# Supplementary material
Source: PubMed Central journal article supplement (PMC5313346)

# Accessing Alternative Reaction Pathways of the Intermolecular Condensation between Homo-Propargyl Alcohols and Terminal Alkynes through Divergent Gold Catalysis

Courtney A. Smith, Stephen E. Motika, Lukasz Wojtas, Xiaodong Shi \*

<xmshi@usf.edu>

*Department of Chemistry, University of South Florida, Tampa, Florida, 33620, USA.*

## Table of Contents:

|                                                            |            |
|------------------------------------------------------------|------------|
| <b>I. Materials and Methods</b>                            | <b>S2</b>  |
| <b>II. <sup>1</sup>H-NMR Monitoring of Ring Expansion</b>  | <b>S6</b>  |
| <b>III. X-Ray Crystallographic Data for 6m, 7b, and 7g</b> | <b>S7</b>  |
| <b>IV. Characterization Data</b>                           | <b>S14</b> |
| <b>V. NMR Spectral Data</b>                                | <b>S35</b> |

## I. Materials and Methods

Unless otherwise noted, all reagents and solvents were obtained from a commercial provider and used without further purification. All reactions were run in oven-dried or flame-dried glassware under an atmosphere of N<sub>2</sub>. Chloroform was dried over 3Å MS prior to use. <sup>1</sup>H- and <sup>13</sup>C-NMR data was recorded on an Agilent 400 or 500 MHz NMR spectrometer. Reaction monitoring was carried out using either <sup>1</sup>H-NMR or analytical thin-layer chromatography. Analytical thin-layer chromatography was performed with pre-coated, glass-baked plates (250μ) and visualized by fluorescence or charring with potassium permanganate stain. Flash column chromatography was performed on 230-430 mesh silica gel. Chemical shifts for starting materials and products were recorded relative to internal TMS (0.00 ppm) for <sup>1</sup>H-NMR and CDCl<sub>3</sub> (77.00 ppm) for <sup>13</sup>C-NMR data. HRMS were recorded on a LTQ-FTUHRA spectrometer.

### 1.1: General coupling procedure for synthesizing compounds **1a-1j**, **1l**.

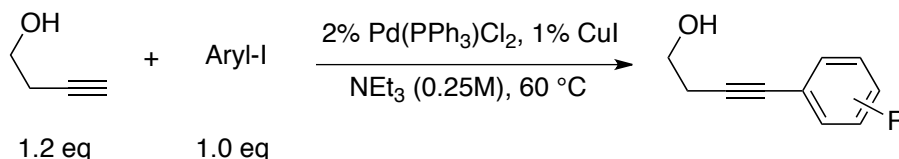

Aryl-substituted homopropargyl alcohols (**1a-1j**; **1l**) were synthesized according to a modified literature procedure.<sup>1</sup> To a flame-dried flask was added aryl-iodide (1.0 eq, 4 mmol), alkynol (1.2 eq, 4.8 mmol), and triethylamine (0.25M). The mixture was placed under inert atmosphere and Pd(PPh<sub>3</sub>)Cl<sub>2</sub> (2 mol %, 0.08 mmol) then CuI (1 mol %, 0.04 mmol) were sequentially added. The reaction was heated to 60 °C and stirred for 2-12 h, monitoring by TLC until completion. The crude was filtered through a short pad of silica, eluting with EtOAc (2 x 50 mL), then concentrated *in vacuo*. The mixture was purified via flash column chromatography on silica gel (eluting with 3:1 hexanes/ethyl acetate) to afford the corresponding aryl-substituted alkynols.

### 1.2: General procedure for synthesizing compounds **1p**, **1q**.

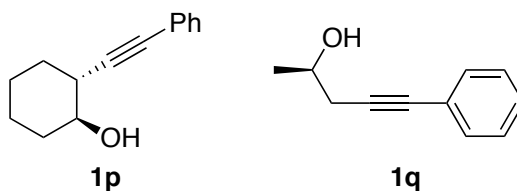

Chiral aryl-substituted homopropargyl alcohols (**1p**, **1q**) were synthesized according to literature procedure.<sup>2</sup>

<sup>1</sup> D. Y. Li, H. J. Chen, and P. N. Liu, *Angew. Chem.* 2016, **128**, 381.

<sup>2</sup> R. D. Grigg, J. W. Rigoli, S. D. Pearce, and J. M. Schomaker, *Org. Lett.* 2012, **14**, 280.

### 1.3: General EDC coupling procedure for synthesizing compounds 2p, 2q, 2s, 2t.

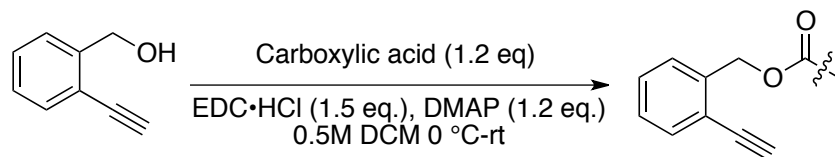

To an oven-dried flask was added the corresponding carboxylic acid (1.2 eq, 4.8 mmol) in dichloromethane (0.5M). DMAP (1.2 eq, 4.8 mmol) then alcohol (1.0 eq, 4.0 mmol) were added sequentially. The mixture was cooled to 0 °C. After cooling, EDC·HCl (1.5 eq, 6.0 mmol) was added slowly and the reaction was stirred at 0 °C for 5 minutes. The mixture was warmed to room temperature and stirred until completion, monitoring by TLC. The reaction was then diluted with water (20 mL), extracted with DCM (3 x 15 mL), and washed with brine (5 mL). The mixture was purified via flash column chromatography on silica gel (eluting with 5:1 hexanes/ethyl acetate) to afford the corresponding alkynes.

### 1.3: General procedure A for synthesizing compounds 6.

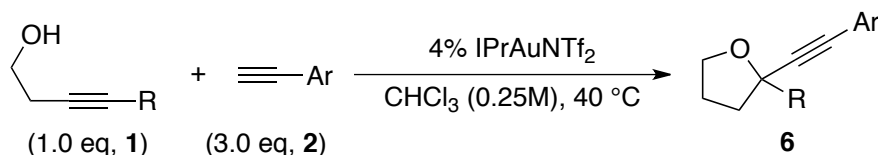

To a 2 mL vial charged with IPrAuNTf<sub>2</sub> (6.9 mg, 0.008 mmol) was sequentially added CHCl<sub>3</sub> (0.8 mL), **1** (1.0 eq, 0.2 mmol), and **2** (3.0 eq, 0.6 mmol). The reaction mixture was purged with argon for at least 1 minute and then stirred at 40 °C. After the reaction is complete (0.25h-7h), the mixture was directly purified via flash column chromatography on silica gel or by preparatory TLC to afford the desired product.

### General procedure B for synthesizing compounds 7.

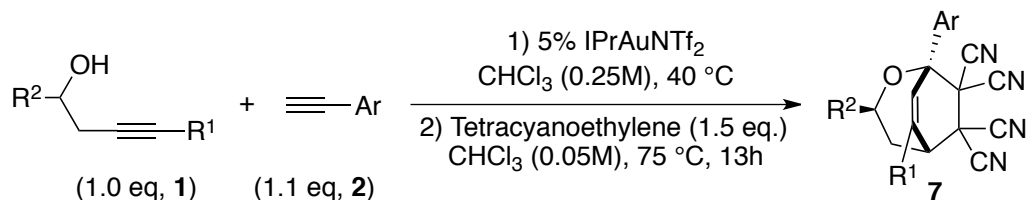

To a 2 mL vial charged with IPrAuNTf<sub>2</sub> (17.33 mg, 0.02 mmol) was sequentially added CHCl<sub>3</sub> (1.6 mL), **1** (1.0 eq, 0.4 mmol), and **2** (1.1 eq, 0.44 mmol). The reaction mixture was purged with argon for at least 1 minute and then stirred at 40 °C. After the reaction is complete (6h-16h), the mixture was passed through a short silica pad and collected in a

new 5mL-vial. The silica pad was rinsed with 2.0 mL CHCl<sub>3</sub>. The dienophile was then added (0.6 mmol), the vial sealed securely with parafilm, and the resulting mixture was stirred for 13h at 75 °C. The reaction was concentrated *in vacuo* and purified via flash column chromatography on silica gel with 3:1 hexanes/ethyl acetate as eluent to afford the desired product.

### Comprehensive screening table of catalytic conditions.

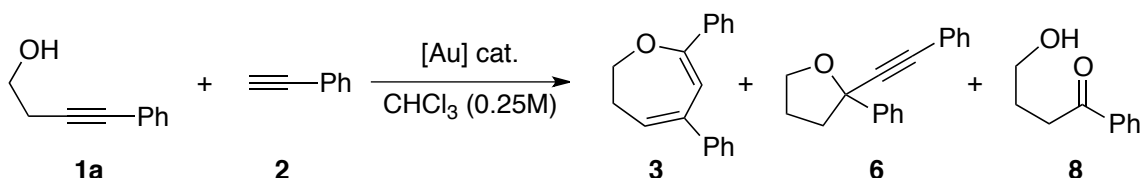

| Entry | Conditions                                                          | T °C | t (h) | eq 2 | convn (%) | yield (%) <sup>a</sup> |      |      |
|-------|---------------------------------------------------------------------|------|-------|------|-----------|------------------------|------|------|
|       |                                                                     |      |       |      |           | 3                      | 6    | 8    |
| 1     | 5% [XPhosAu(TA)]OTf,<br>1% Cu(OTf) <sub>2</sub> , PhCH <sub>3</sub> | rt   | 24h   | 3    | 100       | >5%                    | n.d. | n.d. |
| 2     | 5% RuPhosAuNTf <sub>2</sub>                                         | rt   | 12h   | 3    | 100       | n.d.                   | 47   | n.d. |
| 3     | 5% RuPhosAuNTf <sub>2</sub>                                         | 40   | 4h    | 3    | 100       | n.d.                   | 61   | n.d. |
| 4     | 5% IPrAuNTf <sub>2</sub>                                            | 40   | 4h    | 3    | 100       | n.d.                   | 91   | n.d. |
| 5     | 5% IPrAuNTf <sub>2</sub>                                            | 40   | 4h    | 2    | 100       | 56                     | 36   | n.d. |
| 6     | 5% IPrAuNTTf <sub>2</sub>                                           | 40   | 11h   | 1.1  | 100       | 74                     | n.d. | n.d. |
| 7     | 4% IPrAuNTf <sub>2</sub>                                            | 40   | 4h    | 3    | 100       | n.d.                   | 87   | n.d. |
| 8     | 1% IPrAuNTf <sub>2</sub>                                            | 40   | 4h    | 3    | 100       | n.d.                   | 34   | 53   |
| 9     | 5% PPh <sub>3</sub> AuCl/AgOTf                                      | 40   | 4h    | 3    | 100       | n.d.                   | 32   | 61   |
| 10    | 5% PPh <sub>3</sub> AuCl                                            | 40   | 4h    | 3    | 44        | n.d.                   | n.d. | 44   |
| 11    | 5% PPh <sub>3</sub> AuNTf <sub>2</sub>                              | 40   | 4h    | 3    | 100       | n.d.                   | 28   | 64   |
| 12    | 5% (tBu) <sub>3</sub> PAuNTf <sub>2</sub>                           | 40   | 4h    | 3    | 100       | n.d.                   | 32   | 60   |
| 13    | (OAr) <sub>3</sub> PAuNTf <sub>2</sub> <sup>b</sup>                 | 40   | 4h    | 3    | 100       | n.d.                   | 32   | 58   |
| 14    | 5% JohnPhosAuNTf <sub>2</sub>                                       | 40   | 4h    | 3    | 100       | n.d.                   | 27   | 66   |
| 15    | 5% XPhosAuNTf <sub>2</sub>                                          | 40   | 4h    | 3    | 100       | n.d.                   | 22   | 69   |
| 16    | 5% [RuPhosAu(TA-H)]OTf                                              | 40   | 4h    | 3    | 100       | n.d.                   | 29   | 47   |
| 17    | 5% [RuPhosAu(TA-Me)]OTf                                             | 40   | 4h    | 3    | 100       | n.d.                   | 37   | 32   |
| 18    | 5% AuCl <sub>3</sub>                                                | 40   | 4h    | 3    | 100       | n.d.                   | n.d. | n.d. |
| 19    | 10% AgSbF <sub>6</sub>                                              | 40   | 4h    | 3    | 46        | n.d.                   | n.d. | 23   |
| 20    | 10% AgOTf                                                           | 40   | 4h    | 3    | 16        | n.d.                   | n.d. | 16   |

|    |                          |    |    |   |     |      |      |      |
|----|--------------------------|----|----|---|-----|------|------|------|
| 21 | 10% In(OTf) <sub>3</sub> | 40 | 4h | 3 | 100 | n.d. | <5%  | n.d. |
| 22 | 10% HOTf                 | 40 | 4h | 3 | 100 | n.d. | n.d. | 15   |
| 23 | 10% ZnBr <sub>2</sub>    | 40 | 4h | 3 | 45  | n.d. | n.d. | 38   |
| 24 | 5% CuBr                  | 40 | 4h | 3 | 0   | n.d. | <5%  | n.d. |
| 25 | 5% CuI                   | 40 | 4h | 3 | 0   | n.d. | <5%  | n.d. |
| 26 | 5% Cu(OTf) <sub>2</sub>  | 40 | 4h | 3 | 0   | n.d. | <5%  | n.d. |
| 27 | 5% Pd(OAc) <sub>2</sub>  | 40 | 4h | 3 | 0   | n.d. | <5%  | n.d. |

<sup>a</sup> The yield was determined by <sup>1</sup>H-NMR using 1,3,5-trimethoxybenzene as the internal standard. <sup>b</sup> Ar = 2,4-Di-<sup>13</sup>C-ButylBenzene

## II. $^1\text{H-NMR}$ Monitoring of Ring Expansion

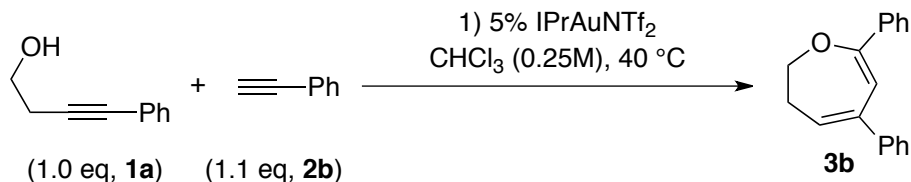

To a 2 mL vial charged with IPrAuNTf<sub>2</sub> (17.33 mg, 0.02 mmol) was sequentially added CHCl<sub>3</sub> (1.6 mL), **1a** (1.0 eq, 0.4 mmol), and **2b** (1.1 eq, 0.44 mmol). The reaction mixture was purged with argon for at least 1 minute and then stirred at 40 °C. The yield of the products was determined via  $^1\text{H-NMR}$  with 1,3,5-trimethoxybenzene as the internal standard.

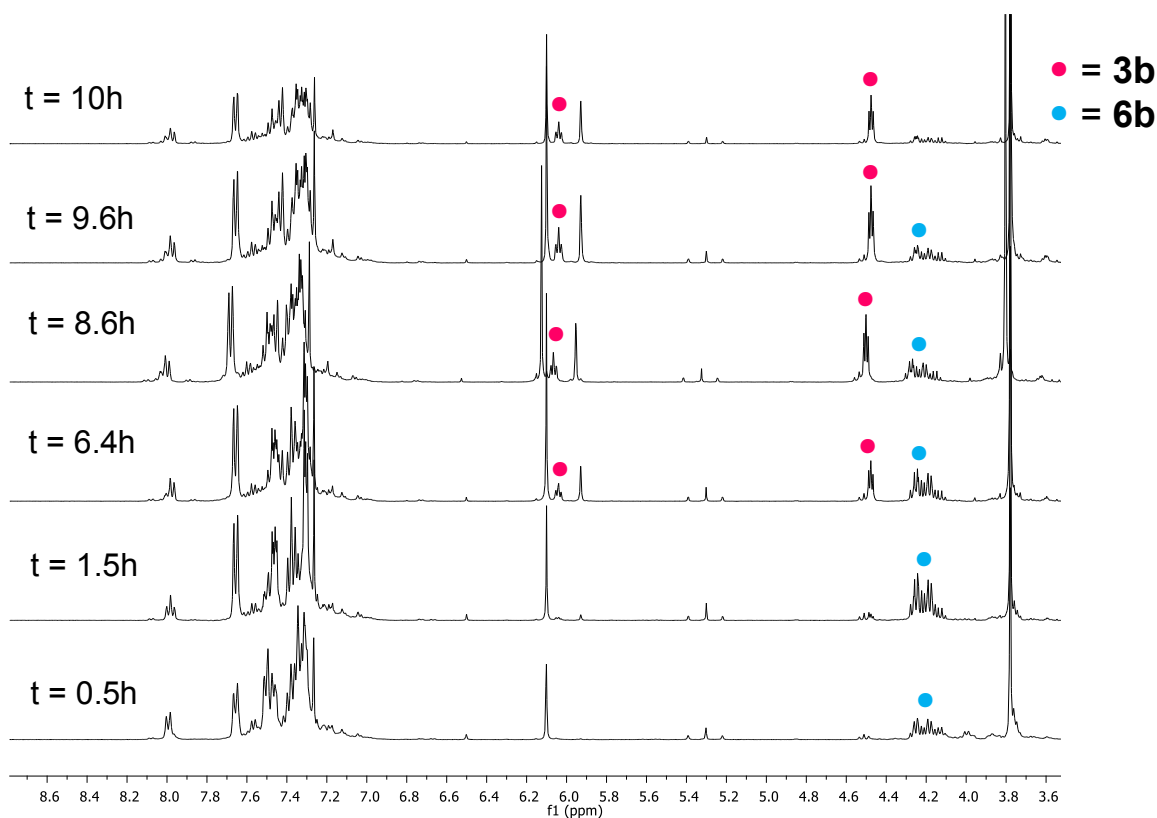

Figure 1.  $^1\text{H-NMR}$  monitoring of ring expansion

### III. X-Ray Crystallographic Data for 6m, 7b, and 7g

The X-ray diffraction data for all compounds were measured on Bruker D8 Venture PHOTON 100 CMOS system equipped with a Cu K $\alpha$  INCOATEC ImuS micro-focus source ( $\lambda = 1.54178 \text{ \AA}$ ). Indexing was performed using *APEX3* [1] (Difference Vectors method). Data integration and reduction were performed using SaintPlus 6.01 [2]. Absorption correction was performed by a multi-scan method implemented in SADABS [3]. Space groups were determined using XPREP implemented in APEX3 [1]. Structures were solved using SHELXS-97 (direct methods) and refined using SHELXL-2014 [4-6] (full-matrix least-squares on  $F^2$ ) through OLEX2 interface program [7]. All non-hydrogen atoms were refined anisotropically. Hydrogen atoms of -CH and -CH<sub>2</sub> groups were placed in geometrically calculated positions and were included in the refinement process using riding model with isotropic thermal parameters: Uiso(H) = 1.2Ueq(-CH,-CH<sub>2</sub>).

**Compound 7b:** Crystal was a twin. The data have been integrated using two orientation matrices (twin law: -1 0 0 0 -1 0 0.4 0 1) and HKLF5 reflection file was used for refinement.

**Compound 7g:** The disordered -CF<sub>3</sub> group has been refined using distance (DFIX), angular (DANG) restraints and ADP restraints (RIGU). EADP constraint has been used for closely overlapping atoms C70A and C70B. Crystal data and refinement conditions are shown in Tables 1-3.

[1] Bruker (2016). *APEX3* (Version 2015.9). Bruker AXS Inc., Madison, Wisconsin, USA.

[2] Bruker (2016) SAINT V8.35A. Data Reduction Software.

[3] Sheldrick, G. M. (1996). *SADABS. Program for Empirical Absorption Correction*. University of Gottingen, Germany.

[4] Sheldrick, G.M. (1997) SHELXL-97. Program for the Refinement of Crystal

[5] Sheldrick, G.M. (1990) Acta Cryst. A46, 467-473

[6] Sheldrick, G. M. (2008). Acta Cryst. A64, 112-122.

[7] Dolomanov, O.V.; Bourhis, L.J.; Gildea, R.J.; Howard, J.A.K.; Puschmann, H., OLEX2: A complete structure solution, refinement and analysis program (2009). J. Appl. Cryst., 42, 339-341

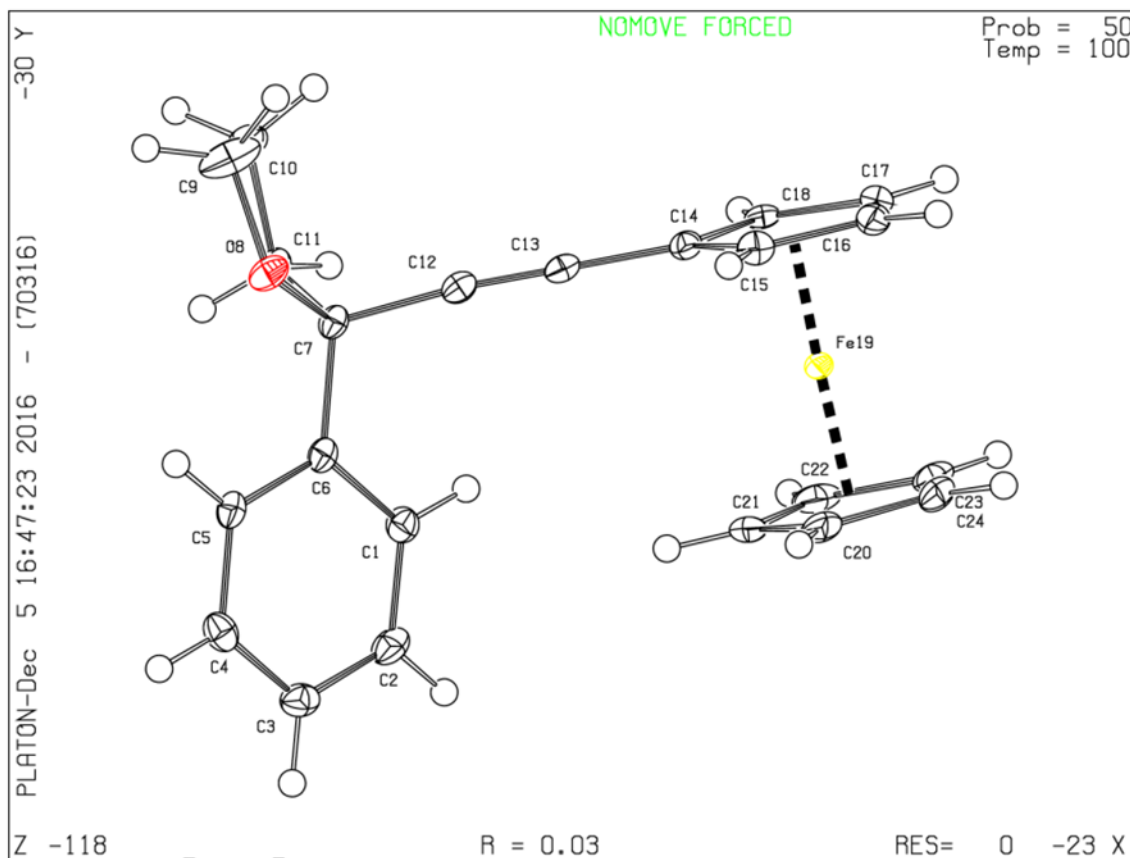

**Figure 2.** Perspective view of molecular structure  $C_{22}H_{20}FeO$  with atom labeling.  
CCDC 1521359



**Table 1. Crystal data and structure refinement for 6m.**

|                                             |                                                               |
|---------------------------------------------|---------------------------------------------------------------|
| Identification code                         | 6m                                                            |
| Empirical formula                           | C <sub>22</sub> H <sub>20</sub> FeO                           |
| Formula weight                              | 356.23                                                        |
| Temperature/K                               | 100.0                                                         |
| Crystal system                              | triclinic                                                     |
| Space group                                 | P-1                                                           |
| a/Å                                         | 7.2823(2)                                                     |
| b/Å                                         | 10.5512(3)                                                    |
| c/Å                                         | 11.3059(3)                                                    |
| α/°                                         | 92.6290(10)                                                   |
| β/°                                         | 100.8210(10)                                                  |
| γ/°                                         | 101.1970(10)                                                  |
| Volume/Å <sup>3</sup>                       | 833.96(4)                                                     |
| Z                                           | 2                                                             |
| ρ <sub>calc</sub> /g/cm <sup>3</sup>        | 1.419                                                         |
| μ/mm <sup>-1</sup>                          | 7.265                                                         |
| F(000)                                      | 372.0                                                         |
| Crystal size/mm <sup>3</sup>                | 0.2 × 0.2 × 0.05                                              |
| Radiation                                   | CuKα (λ = 1.54178)                                            |
| 2Θ range for data collection/°              | 7.99 to 133.044                                               |
| Index ranges                                | -8 ≤ h ≤ 8, -12 ≤ k ≤ 12, -12 ≤ l ≤ 13                        |
| Reflections collected                       | 9825                                                          |
| Independent reflections                     | 2911 [R <sub>int</sub> = 0.0480, R <sub>sigma</sub> = 0.0440] |
| Data/restraints/parameters                  | 2911/0/217                                                    |
| Goodness-of-fit on F <sup>2</sup>           | 1.033                                                         |
| Final R indexes [I ≥ 2σ (I)]                | R <sub>1</sub> = 0.0329, wR <sub>2</sub> = 0.0734             |
| Final R indexes [all data]                  | R <sub>1</sub> = 0.0373, wR <sub>2</sub> = 0.0761             |
| Largest diff. peak/hole / e Å <sup>-3</sup> | 0.30/-0.32                                                    |

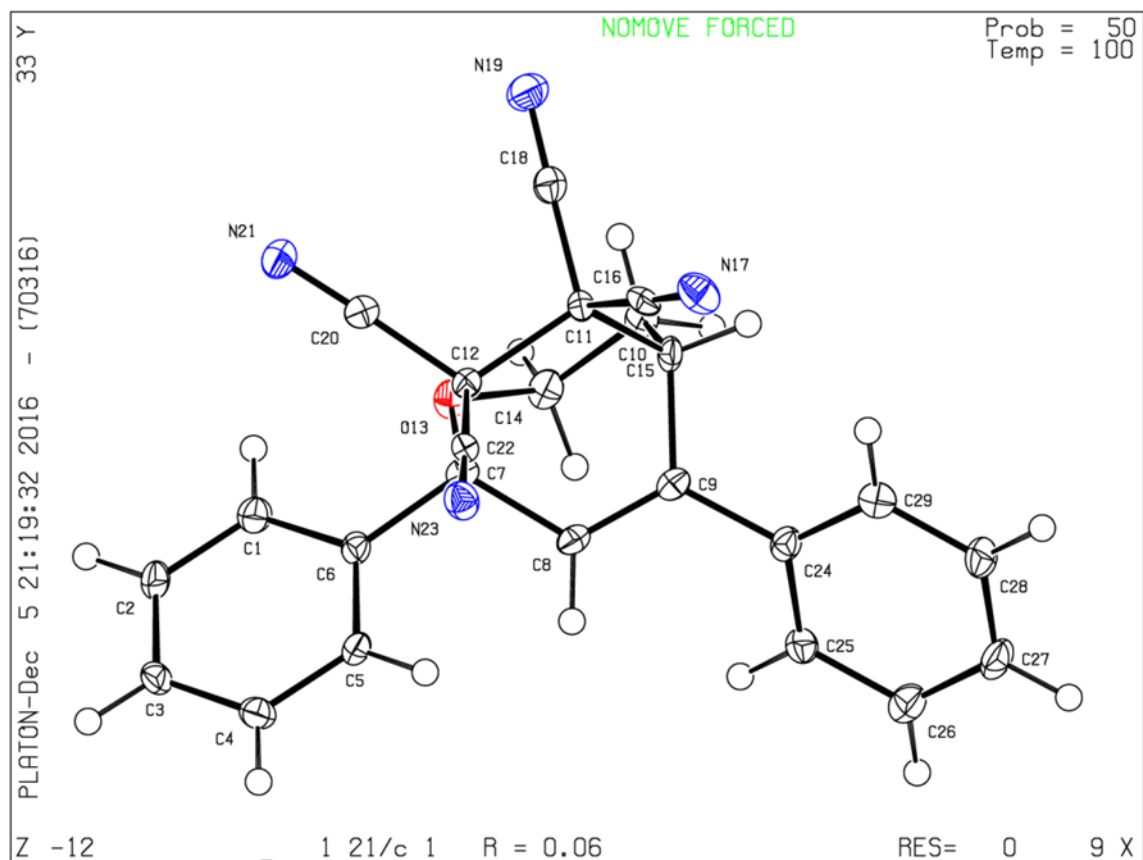

**Figure 3.** Perspective view of molecular structure  $C_{24}H_{16}N_4O$  with atom labeling.  
 CCDC 1521360

**Table 2. Crystal data and structure refinement for 7b.**

|                                             |                                                          |
|---------------------------------------------|----------------------------------------------------------|
| Identification code                         | 7b                                                       |
| Empirical formula                           | C <sub>24</sub> H <sub>16</sub> N <sub>4</sub> O         |
| Formula weight                              | 376.41                                                   |
| Temperature/K                               | 100.03                                                   |
| Crystal system                              | monoclinic                                               |
| Space group                                 | P2 <sub>1</sub> /c                                       |
| a/Å                                         | 14.4429(4)                                               |
| b/Å                                         | 8.4127(2)                                                |
| c/Å                                         | 15.5871(4)                                               |
| α/°                                         | 90                                                       |
| β/°                                         | 100.5300(10)                                             |
| γ/°                                         | 90                                                       |
| Volume/Å <sup>3</sup>                       | 1862.00(8)                                               |
| Z                                           | 4                                                        |
| ρ <sub>calc</sub> /g/cm <sup>3</sup>        | 1.343                                                    |
| μ/mm <sup>-1</sup>                          | 0.680                                                    |
| F(000)                                      | 784.0                                                    |
| Crystal size/mm <sup>3</sup>                | 0.276 × 0.192 × 0.088                                    |
| Radiation                                   | CuKα (λ = 1.54178)                                       |
| 2θ range for data collection/°              | 6.224 to 136.462                                         |
| Index ranges                                | -17 ≤ h ≤ 17, 0 ≤ k ≤ 10, 0 ≤ l ≤ 18                     |
| Reflections collected                       | 3385                                                     |
| Independent reflections                     | 3385 [R <sub>int</sub> = ?, R <sub>sigma</sub> = 0.0493] |
| Data/restraints/parameters                  | 3385/0/263                                               |
| Goodness-of-fit on F <sup>2</sup>           | 1.165                                                    |
| Final R indexes [I >= 2σ (I)]               | R <sub>1</sub> = 0.0649, wR <sub>2</sub> = 0.1210        |
| Final R indexes [all data]                  | R <sub>1</sub> = 0.0819, wR <sub>2</sub> = 0.1291        |
| Largest diff. peak/hole / e Å <sup>-3</sup> | 0.26/-0.26                                               |

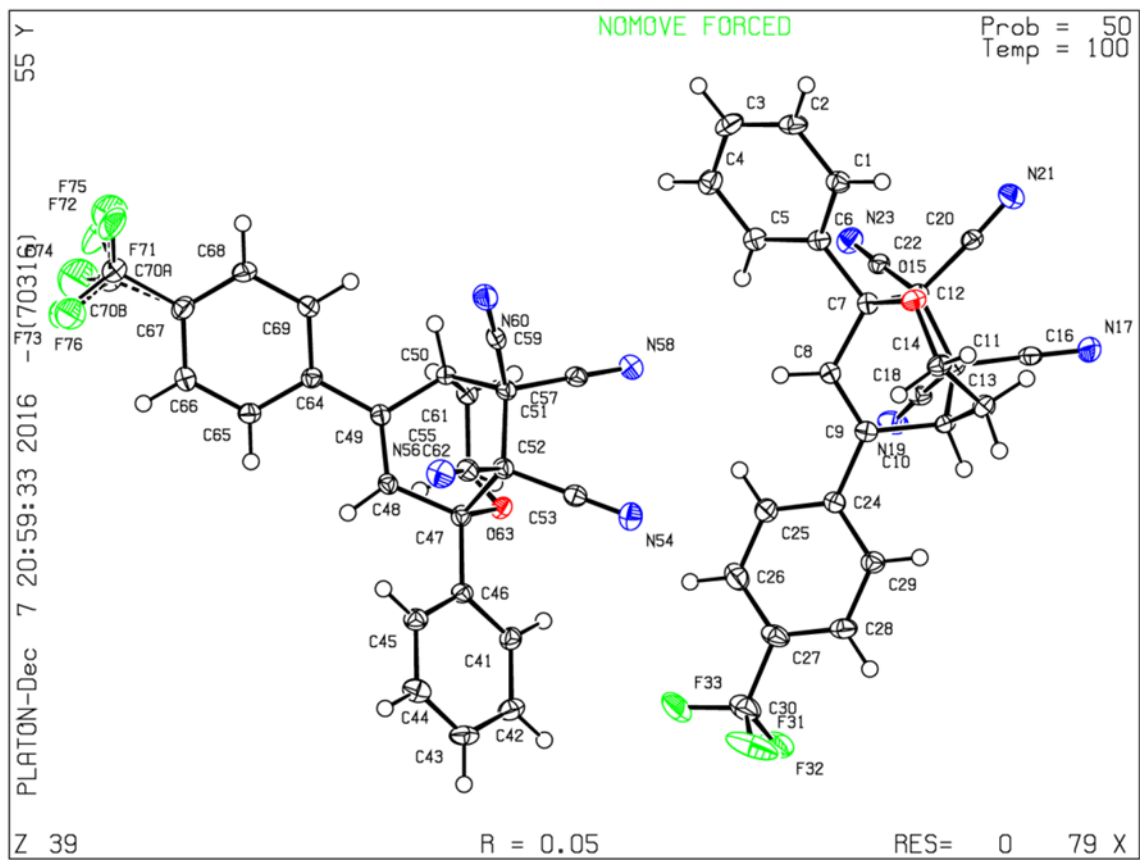

**Figure 4.** Perspective view of molecular structure  $C_{25}H_{15}F_3N_4O$  with atom labeling.  
CCDC 1521361

**Table 3 - Crystal data and structure refinement for 7g.**

|                                             |                                                                 |
|---------------------------------------------|-----------------------------------------------------------------|
| Identification code                         | 7g                                                              |
| Empirical formula                           | C <sub>25</sub> H <sub>15</sub> F <sub>3</sub> N <sub>4</sub> O |
| Formula weight                              | 444.41                                                          |
| Temperature/K                               | 100.04                                                          |
| Crystal system                              | triclinic                                                       |
| Space group                                 | P-1                                                             |
| a/Å                                         | 10.3921(3)                                                      |
| b/Å                                         | 11.9914(3)                                                      |
| c/Å                                         | 17.5331(4)                                                      |
| α/°                                         | 80.3565(12)                                                     |
| β/°                                         | 89.9964(14)                                                     |
| γ/°                                         | 76.6551(13)                                                     |
| Volume/Å <sup>3</sup>                       | 2094.17(9)                                                      |
| Z                                           | 4                                                               |
| ρ <sub>calc</sub> /g/cm <sup>3</sup>        | 1.410                                                           |
| μ/mm <sup>-1</sup>                          | 0.907                                                           |
| F(000)                                      | 912.0                                                           |
| Crystal size/mm <sup>3</sup>                | 0.31 × 0.23 × 0.19                                              |
| Radiation                                   | CuKα (λ = 1.54178)                                              |
| 2θ range for data collection/°              | 5.116 to 154.388                                                |
| Index ranges                                | -12 ≤ h ≤ 13, -15 ≤ k ≤ 15, -21 ≤ l ≤ 22                        |
| Reflections collected                       | 30098                                                           |
| Independent reflections                     | 8427 [R <sub>int</sub> = 0.0517, R <sub>sigma</sub> = 0.0460]   |
| Data/restraints/parameters                  | 8427/34/612                                                     |
| Goodness-of-fit on F <sup>2</sup>           | 1.047                                                           |
| Final R indexes [I ≥ 2σ (I)]                | R <sub>1</sub> = 0.0463, wR <sub>2</sub> = 0.0938               |
| Final R indexes [all data]                  | R <sub>1</sub> = 0.0719, wR <sub>2</sub> = 0.1060               |
| Largest diff. peak/hole / e Å <sup>-3</sup> | 0.31/-0.24                                                      |

## IV. Characterization Data

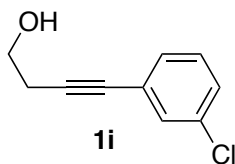

The title compound **1i** was isolated via flash chromatography on silica gel (Elution: hexanes/ethyl acetate = 3/1) as a pale-yellow oil (621 mg, 86% yield).

**<sup>1</sup>H NMR** (500 MHz; CDCl<sub>3</sub>): δ 7.45 – 7.34 (m, 1H), 7.28 – 7.12 (m, 3H), 3.83 – 3.73 (m, 2H), 3.01 (s, 1H), 2.68 – 2.60 (m, 2H).

**<sup>13</sup>C NMR** (126 MHz; CDCl<sub>3</sub>): δ 133.97, 131.52, 129.76, 129.45, 128.14, 125.11, 88.09, 80.88, 60.93, 23.63.

**HRMS** calculated for C<sub>10</sub>H<sub>10</sub>ClO [M+H]<sup>+</sup>: 181.0420, Found: 181.0402

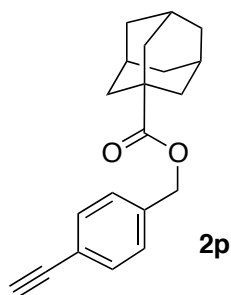

The title compound **2p** was isolated via flash chromatography on silica gel (Elution: hexanes/ethyl acetate = 5/1) as a white solid (754 mg, 64% yield).

**<sup>1</sup>H NMR** (400 MHz; CDCl<sub>3</sub>): δ 7.55 – 7.39 (m, 2H), 7.30 – 7.21 (m, 2H), 5.07 (s, 2H), 3.05 (s, 1H), 2.05 – 1.54 (m, 15H).

**<sup>13</sup>C NMR** (126 MHz; CDCl<sub>3</sub>): δ 177.31, 137.29, 132.23, 127.47, 121.67, 83.31, 77.44, 65.17, 40.76, 38.80, 36.45, 27.89.

**HRMS** calculated for C<sub>20</sub>H<sub>23</sub>O<sub>2</sub> [M+H]<sup>+</sup>: 295.1698, Found: 295.1674

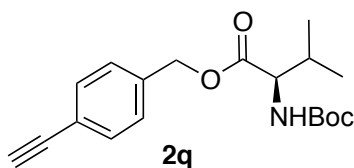

The title compound **2q** was isolated via flash chromatography on silica gel (Elution: hexanes/ethyl acetate = 5/1) as a white solid (716 mg, 54% yield).

**<sup>1</sup>H NMR** (400 MHz; CDCl<sub>3</sub>): δ 7.40 (d, *J* = 8.0 Hz, 2H), 7.24 (d, *J* = 8.0 Hz, 1.4H), 7.16 (d, *J* = 8.2 Hz, 0.6H), 5.16 – 4.97 (m, 3H), 4.25 – 4.16 (m, 1H), 3.05 (s, 1H), 2.24 – 1.96 (m, 1H), 1.37 (s, 9H), 0.87 (d, *J* = 6.8 Hz, 3H), 0.79 (d, *J* = 6.8 Hz, 3H).

**<sup>13</sup>C NMR** (126 MHz; CDCl<sub>3</sub>): δ 172.14, 155.61, 136.11, 134.47, 132.22, 131.65, 129.95, 128.06, 122.35, 122.13, 83.13, 79.68, 77.86, 66.17, 58.55, 31.16, 28.26, 18.99, 17.50.

**HRMS** calculated for C<sub>19</sub>H<sub>26</sub>NO<sub>4</sub> [M+H]<sup>+</sup>: 332.1862, Found: 332.1846

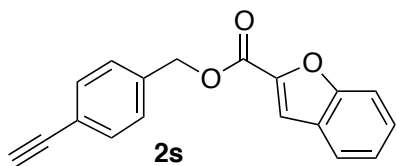

The title compound **2s** was isolated via flash chromatography on silica gel (Elution: hexanes/ethyl acetate = 5/1) as a white solid (906 mg, 82% yield).

**<sup>1</sup>H NMR** (400 MHz; CDCl<sub>3</sub>): δ 7.66 (d, *J* = 7.8 Hz, 1H), 7.59 – 7.47 (m, 4H), 7.47 – 7.36 (m, 3H), 7.29 (t, *J* = 7.5 Hz, 1H), 5.39 (s, 2H), 3.08 (s, 1H).

**<sup>13</sup>C NMR** (126 MHz; CDCl<sub>3</sub>): δ 159.28, 155.81, 145.13, 136.04, 132.39, 128.20, 127.79, 126.86, 123.85, 122.86, 122.30, 114.39, 112.39, 83.17, 77.77, 66.42.

**HRMS** calculated for C<sub>18</sub>H<sub>12</sub>NaO<sub>3</sub> [M+Na]<sup>+</sup>: 299.0684, Found: 299.0670

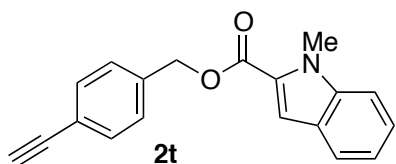

The title compound **2t** was isolated via flash chromatography on silica gel (Elution: hexanes/ethyl acetate = 5/1) as a white solid (706 mg, 61% yield).

**<sup>1</sup>H NMR** (500 MHz; CDCl<sub>3</sub>): δ 7.69 – 7.62 (m, *J* = 8.0 Hz, 1H), 7.50 (d, *J* = 8.2 Hz, 2H), 7.43 – 7.33 (m, 5H), 7.17 – 7.10 (m, 1H), 5.34 (s, 2H), 4.07 (s, 3H), 3.08 (s, 1H).

**<sup>13</sup>C NMR** (126 MHz; CDCl<sub>3</sub>): δ 161.83, 139.78, 136.82, 132.35, 127.80, 127.32, 125.81, 125.19, 122.63, 121.99, 120.64, 110.64, 110.25, 83.265, 77.61, 65.56, 31.63.

**HRMS** calculated for C<sub>19</sub>H<sub>16</sub>NO<sub>2</sub> [M+H]<sup>+</sup>: 290.1181, Found: 290.1168

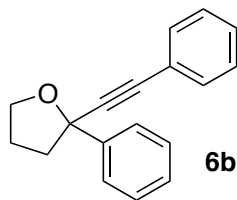

**6b** was synthesized with 4 mol % IPrAuNTf<sub>2</sub>, 3 equiv. alkyne, 40 °C, 24h, in CHCl<sub>3</sub>.

The title compound was isolated via flash chromatography on silica gel (Elution: hexanes/ethyl acetate = 20/1) as a yellow oil (43 mg, 87%).

**<sup>1</sup>H NMR** (500 MHz; CDCl<sub>3</sub>): δ 7.70 – 7.63 (m, 2H), 7.50 – 7.44 (m, 2H), 7.40 – 7.33 (m, 2H), 7.32 – 7.27 (m, 4H), 4.32 – 4.10 (m, 2H), 2.62 (ddd, *J* = 12.2, 7.6, 4.7 Hz, 1H), 2.36 – 2.24 (m, 1H), 2.19 (dt, *J* = 12.0, 8.0 Hz, 1H), 2.13 – 2.02 (m, 1H).

**<sup>13</sup>C NMR** (126 MHz; CDCl<sub>3</sub>): 143.64, 131.74, 128.25, 128.22, 128.18, 127.49, 125.32, 122.87, 91.26, 84.98, 80.92, 68.47, 43.02, 25.87.

**HRMS** calculated for C<sub>18</sub>H<sub>17</sub>O [M+H]<sup>+</sup>: 249.1279, Found: 249.1278

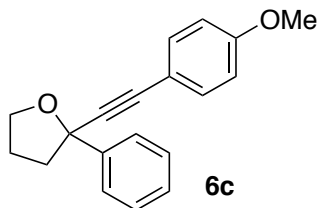

**6c** was synthesized with 4 mol % IPrAuNTf<sub>2</sub>, 3 equiv. alkyne, 40 °C, 4h, in CHCl<sub>3</sub>. The title compound was isolated via flash chromatography on silica gel (Elution: hexanes/ethyl acetate = 20/1) as a pale-yellow oil (40 mg, 72%).  
**<sup>1</sup>H NMR** (500 MHz; CDCl<sub>3</sub>): δ 7.64 (d, *J* = 7.8 Hz, 2H), 7.48 – 7.20 (m, 5H), 6.82 (d, *J* = 8.8 Hz, 2H), 4.20 (m, 2H), 3.81 (s, 3H), 2.65 – 2.49 (m, 1H), 2.33 – 1.98 (m, 3H).  
**<sup>13</sup>C NMR** (126 MHz; CDCl<sub>3</sub>): δ 159.53, 143.85, 133.17, 128.18, 127.40, 125.33, 114.98, 113.78, 89.81, 84.86, 80.95, 68.40, 55.26, 43.02, 25.86.  
**HRMS** calculated for C<sub>19</sub>H<sub>19</sub>O<sub>2</sub> [M+H]<sup>+</sup>: 279.1385, Found: 279.1390

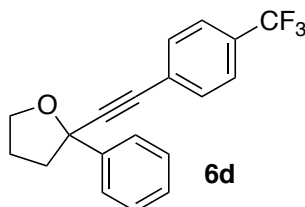

**6d** was synthesized with 4 mol % IPrAuNTf<sub>2</sub>, 3 equiv. alkyne, 40 °C, 4h, in CHCl<sub>3</sub>. The title compound was isolated via preparatory TLC (Elution: hexanes/ethyl acetate = 20/1) as a yellow oil (54 mg, 86%).  
**<sup>1</sup>H NMR**: (500 MHz; CDCl<sub>3</sub>): δ 7.67 – 7.60 (m, 2H), 7.58 – 7.52 (m, 4H), 7.38 (m, 2H), 7.36 – 7.28 (m, 1H), 4.22 (m, 2H), 2.62 (m, 1H), 2.32 – 2.18 (m, 2H), 2.12 – 2.04 (m, 1H).  
**<sup>13</sup>C NMR** (126 MHz; CDCl<sub>3</sub>): δ 143.26, 131.97, 130.00 (q, *J*<sub>C-F</sub> = 32.58 Hz), 128.31, 127.64, 126.66, 125.19, 125.15, 122.79, 93.88, 83.54, 80.79, 68.62, 42.87, 25.86.  
**HRMS** calculated for C<sub>19</sub>H<sub>16</sub>F<sub>3</sub>O [M+H]<sup>+</sup>: 317.1153, Found: 317.1149

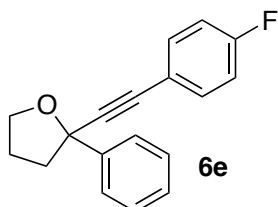

**6e** was synthesized with 4 mol % IPrAuNTf<sub>2</sub>, 3 equiv. alkyne, 40 °C, 4h, in CHCl<sub>3</sub>. The title compound was isolated via flash chromatography on silica gel (Elution: hexanes/ethyl acetate = 20/1) as a yellow oil (44 mg, 82%).  
**<sup>1</sup>H NMR**: (500 MHz; CDCl<sub>3</sub>): δ 7.67 – 7.60 (m, 2H), 7.47 – 7.40 (m, 2H), 7.37 (t, *J* = 7.6 Hz, 2H), 7.30 (t, *J* = 7.3 Hz, 1H), 7.03 – 6.95 (m, 2H), 4.25 – 4.15 (m, 2H), 2.60 (m, 1H), 2.31 – 2.13 (m, 2H), 2.11 – 2.01 (m, 1H).  
**<sup>13</sup>C NMR**: (126 MHz; CDCl<sub>3</sub>): δ 162.29 (d, *J*<sub>C-F</sub> = 249.33 Hz), 143.59, 133.63 (d, *J*<sub>C-F</sub> = 8.35 Hz), 128.24, 127.52, 125.25, 118.92 (d, *J*<sub>C-F</sub> = 3.14 Hz), 115.45 (d, *J*<sub>C-F</sub> = 22.04 Hz), 91.00, 83.85, 80.84, 68.50, 42.94, 25.86.  
**HRMS** calculated for C<sub>18</sub>H<sub>16</sub>FO [M+H]<sup>+</sup>: 267.1185, Found: 267.1180.



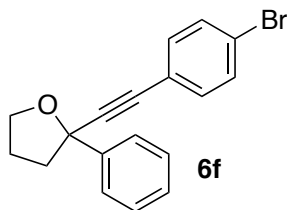

**6f** was synthesized with 4 mol % IPrAuNTf<sub>2</sub>, 3 equiv. alkyne, 40 °C, 4h, in CHCl<sub>3</sub>. The title compound was isolated via flash chromatography on silica gel (Elution: hexanes/ethyl acetate = 30/1) as a yellow oil (44 mg, 68%).

<sup>1</sup>H NMR (400 MHz; CDCl<sub>3</sub>): δ 7.63 – 7.52 (m, 2H), 7.41 (d, *J* = 8.5 Hz, 2H), 7.35 (t, *J* = 7.5 Hz, 2H), 7.30 – 7.27 (m, 3H), 4.34 – 4.08 (m, 2H), 2.62 – 2.53 (m, 1H), 2.29 – 2.14 (m, 2H), 2.09 – 2.01 (m, 1H).

<sup>13</sup>C NMR (101 MHz; CDCl<sub>3</sub>): δ 143.42, 133.16, 131.42, 128.24, 127.54, 125.20, 122.47, 121.79, 92.50, 83.82, 80.82, 68.52, 42.85, 25.83.

HRMS calculated for C<sub>18</sub>H<sub>16</sub>BrO [M+H]<sup>+</sup>: 327.0385, Found: 327.0371

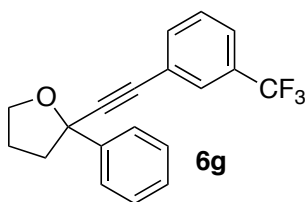

**6g** was synthesized with 4 mol % IPrAuNTf<sub>2</sub>, 3 equiv. alkyne, 40 °C, 4h, in CHCl<sub>3</sub>.

The title compound was isolated via flash chromatography on silica gel (Elution: hexanes/ethyl acetate = 20/1) as a colorless oil (39 mg, 61%).

<sup>1</sup>H NMR (500 MHz; CDCl<sub>3</sub>): δ 7.71 (s, 1H), 7.64 – 7.60 (m, 3H), 7.55 (d, *J* = 7.9 Hz, 1H), 7.45 – 7.36 (m, 3H), 7.31 (m, 1H), 4.21 (m, 2H), 2.62 (ddd, *J* = 12.2, 7.3, 4.7 Hz, 1H), 2.36 – 2.16 (m, 2H), 2.16 – 2.02 (m, 1H).

<sup>13</sup>C NMR (126 MHz; CDCl<sub>3</sub>) δ 143.29, 134.83, 130.81 (q, *J*<sub>C-F</sub> = 32.75 Hz), 128.72, 128.54, 128.31, 127.63, 125.19, 124.82, 123.77, 122.59, 93.01, 83.36, 80.77, 68.60, 42.86, 25.86

HRMS calculated for C<sub>19</sub>H<sub>16</sub>F<sub>3</sub>O [M+H]<sup>+</sup>: 317.1153, Found: 317.1155

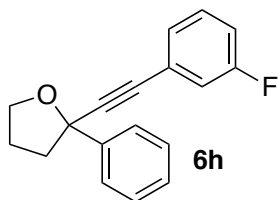

**6h** was synthesized with 4 mol % IPrAuNTf<sub>2</sub>, 3 equiv. alkyne, 40 °C, 4h, in CHCl<sub>3</sub>.

The title compound was isolated via flash chromatography on silica gel (Elution: hexanes/ethyl acetate = 20/1) as a colorless oil (47 mg, 89%).

<sup>1</sup>H NMR (400 MHz; CDCl<sub>3</sub>): δ 7.62 (d, *J* = 7.4 Hz, 2H), 7.37 (t, *J* = 7.5 Hz, 2H), 7.34 – 7.18 (m, 3H), 7.14 (d, *J* = 9.7 Hz, 1H), 7.07 – 6.95 (m, 1H), 4.32 – 4.10 (m, 2H), 2.66 – 2.54 (m, 1H), 2.35 – 1.97 (m, 3H).

<sup>13</sup>C NMR (126 MHz; CDCl<sub>3</sub>): δ 163.24, 161.28, 143.38, 129.74 (d, *J*<sub>C-F</sub> = 8.58 Hz), 128.27, 127.58, 125.23, 124.68 (d, *J*<sub>C-F</sub> = 9.66 Hz) 118.54 (d, *J*<sub>C-F</sub> = 22.82 Hz), 115.60 (d, *J*<sub>C-F</sub> = 21.11 Hz), 92.28, 83.71, 80.80, 68.55, 42.91, 25.85.

HRMS calculated for C<sub>18</sub>H<sub>16</sub>FO [M+H]<sup>+</sup>: 267.1185, Found: 267.1189

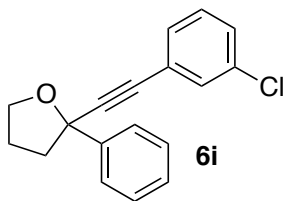

**6i** was synthesized with 4 mol % IPrAuNTf<sub>2</sub>, 3 equiv. alkyne, 40 °C, 1.5h, in CHCl<sub>3</sub>.  
The title compound was isolated via flash chromatography on silica gel (Elution: hexanes/ethyl acetate = 50/1) as a colorless oil (41 mg, 73%).

MW=282.77

**<sup>1</sup>H NMR** (400 MHz; CDCl<sub>3</sub>): δ 7.62 (d, *J* = 7.7 Hz, 2H), 7.44 (s, 1H), 7.40 – 7.15 (m, 6H), 4.41 – 4.02 (m, 2H), 2.73 – 2.43 (m, 1H), 2.48 – 1.92 (m, 3H).

**<sup>13</sup>C NMR** (101 MHz; CDCl<sub>3</sub>): δ 143.33, 133.99, 131.59, 129.82, 129.39, 128.51, 128.25, 127.56, 125.20, 124.53, 92.57, 83.50, 80.78, 68.52, 42.88, 25.82.

**HRMS** calculated for C<sub>18</sub>H<sub>16</sub>ClO [M+H]<sup>+</sup>: 283.0890, Found: 283.0889

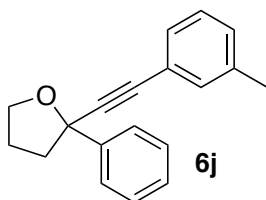

**6j** was synthesized with 4 mol% IPrAuNTf<sub>2</sub>, 3 equiv. alkyne, 40 °C, 4h, in CHCl<sub>3</sub>.  
The title compound was isolated via flash chromatography on silica gel (Elution: hexanes/ethyl acetate = 50/1) as a yellow oil (43 mg, 82%).

**<sup>1</sup>H NMR** (500 MHz; CDCl<sub>3</sub>): δ 7.66 – 7.61 (m, 2H), 7.36 (t, *J* = 7.6 Hz, 2H), 7.28 (t, *J* = 8.3 Hz, 1H), 7.18 (t, *J* = 7.6 Hz, 1H), 7.11 (d, *J* = 7.6 Hz, 1H), 4.27 – 4.13 (m, 2H), 2.59 (ddd, *J* = 12.2, 7.6, 4.6 Hz, 1H), 2.31 – 2.24 (m, 4H), 2.17 (m, 1H), 2.12 – 2.02 (m, 1H).

**<sup>13</sup>C NMR** (126 MHz; CDCl<sub>3</sub>): δ 143.68, 137.85, 132.33, 129.12, 128.79, 128.20, 128.08, 127.46, 125.33, 122.66, 90.87, 85.16, 80.93, 68.43, 43.03, 25.87, 21.18.

**HRMS** calculated for C<sub>19</sub>H<sub>19</sub>O [M+H]<sup>+</sup>: 263.1436, Found: 263.1434

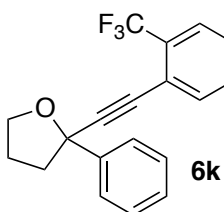

**6k** was synthesized with 4 mol % IPrAuNTf<sub>2</sub>, 3 equiv. alkyne, 40 °C, 4h, in CHCl<sub>3</sub>.  
The title compound was isolated via preparatory TLC (Elution: hexanes/ethyl acetate = 20/1) as a colorless oil (37 mg, 58%).

**<sup>1</sup>H NMR** (500 MHz; CDCl<sub>3</sub>): δ 7.67 – 7.61 (m, 3H), 7.57 (d, *J* = 7.7 Hz, 1H), 7.46 (t, *J* = 7.5 Hz, 1H), 7.38 (m, 3H), 7.29 (m, 1H), 4.28 – 4.14 (m, 2H), 2.64 (ddd, *J* = 11.3, 7.6, 3.7 Hz, 1H), 2.40 – 2.24 (m, 1H), 2.20 – 2.02 (m, 2H).

**<sup>13</sup>C NMR** (126 MHz; CDCl<sub>3</sub>): δ 143.00, 133.96, 131.56 (q, *J*<sub>C-F</sub> = 30.36 Hz), 131.33, 128.24, 128.02, 127.59, 125.72 (q, *J*<sub>C-F</sub> = 4.97 Hz), 125.26, 124.65, 122.47, 121.14, 96.99, 81.00, 68.53, 42.94, 25.71.

**HRMS** calculated for C<sub>19</sub>H<sub>16</sub>F<sub>3</sub>O [M+H]<sup>+</sup>: 317.1153, Found: 317.1148

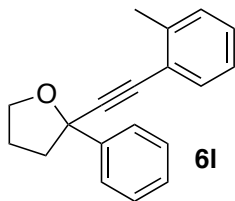

**6l** was synthesized with 4 mol % IPrAuNTf<sub>2</sub>, 3 equiv. alkyne, 40 °C, 15m, in CHCl<sub>3</sub>. The title compound was isolated via flash chromatography on silica gel (Elution: hexanes/ethyl acetate = 50/1) as a pale-yellow oil (49 mg, 94%).

**<sup>1</sup>H NMR** (500 MHz; CDCl<sub>3</sub>): δ 7.67 (d, *J* = 7.5 Hz, 2H), 7.42 (d, *J* = 7.6 Hz, 1H), 7.38 (t, *J* = 7.6 Hz, 2H), 7.30 (t, *J* = 7.3 Hz, 1H), 7.23 – 7.17 (m, 2H), 7.15 – 7.09 (m, 1H), 4.29 – 4.16 (m, 2H), 2.61 (ddd, *J* = 12.3, 7.8, 4.5 Hz, 1H), 2.44 (s, 3H), 2.39 – 2.25 (m, 1H), 2.24 – 2.14 (m, 1H), 2.14 – 2.03 (m, 1H).

**<sup>13</sup>C NMR** (126 MHz; CDCl<sub>3</sub>): δ 143.59, 140.23, 131.96, 129.33, 128.27, 128.20, 127.48, 125.44, 125.34, 122.63, 95.21, 84.07, 81.12, 68.35, 43.16, 25.87, 20.73.

**HRMS** calculated for C<sub>19</sub>H<sub>19</sub>O [M+H]<sup>+</sup>: 263.1436, Found: 263.1434.

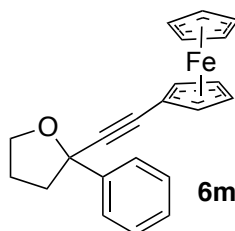

**6m** was synthesized with 4 mol % IPrAuNTf<sub>2</sub>, 3 equiv. alkyne, 40 °C, 5h, in CHCl<sub>3</sub>. The title compound was isolated via flash chromatography on silica gel (Elution: hexanes/ethyl acetate = 20/1) as an orange solid (59 mg, 83%) and crystallized by slow evaporation of a DCM/Hexanes solution at room temperature.

**<sup>1</sup>H NMR** (500 MHz; CDCl<sub>3</sub>): δ 7.69 – 7.61 (m, 2H), 7.37 (t, *J* = 7.6 Hz, 2H), 7.29 (t, *J* = 7.3 Hz, 1H), 4.43 (t, *J* = 1.8 Hz, 2H), 4.27 – 4.13 (m, 9H), 2.55 (ddd, *J* = 12.1, 7.7, 4.6 Hz, 1H), 2.33 – 2.22 (m, 1H), 2.20 – 2.10 (m, 1H), 2.10 – 2.02 (m, 1H).

**<sup>13</sup>C NMR** (126 MHz; CDCl<sub>3</sub>): δ 143.91, 128.15, 127.40, 125.36, 87.40, 83.64, 81.11, 71.57, 71.43, 69.80, 68.57, 68.26, 64.90, 43.04, 25.86.

**HRMS** calculated for C<sub>22</sub>H<sub>21</sub>FeO [M+H]<sup>+</sup>: 357.0942, Found: 357.0924

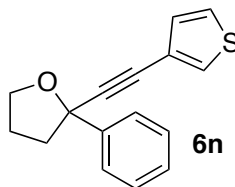

**6n** was synthesized with 4 mol % IPrAuNTf<sub>2</sub>, 3 equiv. alkyne, 40 °C, 4h, in CHCl<sub>3</sub>. The title compound was isolated via flash chromatography on silica gel (Elution: hexanes/ethyl acetate = 20/1) as a yellow oil (47 mg, 93%).

**<sup>1</sup>H NMR** (400 MHz; CDCl<sub>3</sub>): δ 7.68 – 7.56 (m, 2H), 7.47 – 7.43 (m, 1H), 7.36 (t, *J* = 7.5 Hz, 2H), 7.30 – 7.23 (m, 2H), 7.11 (d, *J* = 5.0 Hz, 1H), 4.31 – 3.98 (m, 2H), 2.59 (ddd, *J* = 12.1, 7.2, 4.8 Hz, 1H), 2.43 – 1.93 (m, 3H).

**<sup>13</sup>C NMR** (101 MHz; CDCl<sub>3</sub>): δ 143.62, 129.97, 128.77, 128.19, 127.45, 125.27, 125.09, 121.85, 90.81, 80.89, 80.03, 68.44, 42.89, 25.83.

**HRMS** calculated for C<sub>16</sub>H<sub>15</sub>OS [M+H]<sup>+</sup>: 255.0844, Found: 255.0840.

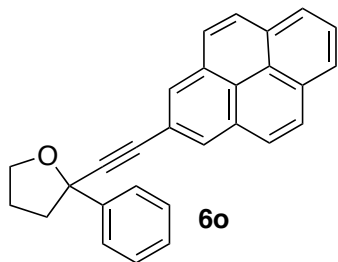

**6o** was synthesized with 4 mol% IPrAuNTf<sub>2</sub>, 3 equiv. alkyne, 40 °C, 4h, in CHCl<sub>3</sub>.

The title compound was isolated via flash chromatography on silica gel (Elution: hexanes/ethyl acetate = 20/1) as a pale-yellow oil (42 mg, 56%).

**<sup>1</sup>H NMR** (400 MHz; CDCl<sub>3</sub>): δ 8.49 (d, *J* = 9.1 Hz, 1H), 8.18 (t, *J* = 6.86, 2H), 8.14 – 7.97 (m, 7H), 7.82 – 7.74 (m, 1H), 7.42 (t, *J* = 7.6 Hz, 2H), 7.32 (t, *J* = 7.3 Hz, 1H), 4.38 (td, *J* = 8.1, 6.0 Hz, 1H), 4.29 – 4.24 (m, 1H), 2.79 (ddd, *J* = 12.2, 7.5, 4.6 Hz, 1H), 2.53 – 2.35 (m, 1H), 2.35 – 2.25 (m, 1H), 2.25 – 2.08 (m, 1H).

**<sup>13</sup>C NMR** (101 MHz; CDCl<sub>3</sub>): δ 143.69, 132.01, 131.20, 131.18, 130.99, 129.76, 128.32, 128.08, 127.58, 127.19, 126.16, 125.53, 125.50, 125.41, 124.34, 124.24, 117.37, 96.97, 84.13, 81.34, 68.57, 43.22, 26.02.

**HRMS** calculated for C<sub>28</sub>H<sub>21</sub>O [M+H]<sup>+</sup>: 373.1592, Found: 373.1587

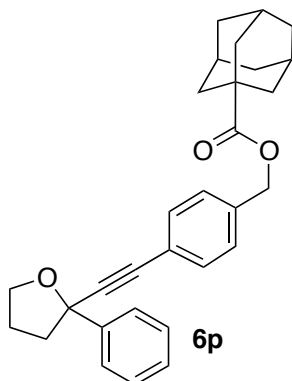

**6p** was synthesized with 4 mol % IPrAuNTf<sub>2</sub>, 3 equiv. alkyne, 40 °C, 1.5h, in CHCl<sub>3</sub>.

The title compound was isolated via flash chromatography on silica gel (Elution: hexanes/ethyl acetate = 15/1) as a colorless oil (58 mg, 66%).

**<sup>1</sup>H NMR** (500 MHz; CDCl<sub>3</sub>): δ 7.67 – 7.60 (m, 2H), 7.44 (d, *J* = 8.2 Hz, 2H), 7.41 – 7.33 (m, 2H), 7.32 – 7.24 (m, 3H), 5.07 (s, 2H), 4.29 – 4.10 (m, 2H), 2.60 (ddd, *J* = 12.2, 7.5, 4.7 Hz, 1H), 2.28 (ddd, *J* = 11.7, 7.8, 6.1 Hz, 1H), 2.23 – 2.15 (m, 1H), 2.12 – 1.97 (m, 4H), 1.93 – 1.86 (m, 6H), 1.75 – 1.67 (m, 6H).

**<sup>13</sup>C NMR** (101 MHz; CDCl<sub>3</sub>): δ 177.31, 143.56, 136.69, 131.83, 128.21, 127.47, 125.28, 122.48, 91.59, 84.64, 80.89, 68.46, 65.25, 42.98, 40.75, 38.79, 36.45, 27.89, 25.84.

**HRMS** calculated for C<sub>30</sub>H<sub>33</sub>O<sub>3</sub> [M+H]<sup>+</sup>: 441.2430, Found: 441.2412

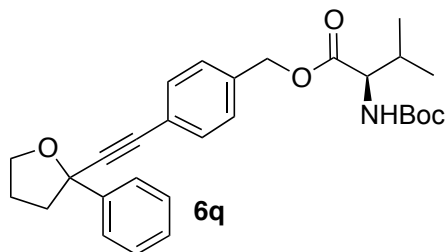

**6q** was synthesized with 4 mol % IPrAuNTf<sub>2</sub>, 3 equiv. alkyne, 40 °C, 7h, in CHCl<sub>3</sub>.  
The title compound was isolated via flash chromatography on silica gel (Elution: hexanes/ethyl acetate = 19/1) as a colorless oil (82 mg, 86%).

MW=477.60

<sup>1</sup>H NMR (500 MHz; CDCl<sub>3</sub>): δ 7.63 (d, *J* = 7.4 Hz, 2H), 7.44 (d, *J* = 8.1 Hz, 2H), 7.37 (t, *J* = 7.6 Hz, 2H), 7.33 – 7.27 (m, 3H), 5.19 (d, *J* = 12.5 Hz, 1H), 5.09 (d, *J* = 12.5 Hz, 1H), 4.99 (d, *J* = 8.8 Hz, 1H), 4.30 – 4.12 (m, 3H), 2.60 (ddd, *J* = 12.23, 7.46, 4.81 Hz, 1H), 2.36 – 2.00 (m, 4H), 1.44 (s, 9H), 0.93 (d, *J* = 6.8 Hz, 3H), 0.84 (d, *J* = 6.8 Hz, 3H).

<sup>13</sup>C NMR (126 MHz; CDCl<sub>3</sub>): δ 172.21, 155.65, 143.54, 135.51, 131.91, 128.23, 128.09, 127.51, 125.27, 122.96, 91.88, 84.47, 80.87, 79.81, 68.51, 66.36, 58.53, 42.96, 31.25, 28.30, 25.86, 19.00, 17.49.

HRMS calculated for C<sub>29</sub>H<sub>36</sub>NO<sub>5</sub> [M+H]<sup>+</sup>: 478.2594, Found: 478.2582

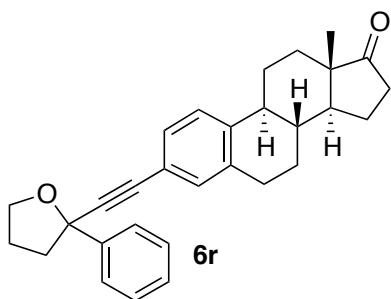

**6r** was synthesized with 4 mol % IPrAuNTf<sub>2</sub>, 3 equiv. alkyne, 40 °C, 4h, in CHCl<sub>3</sub>.  
The title compound was isolated via flash chromatography on silica gel (Elution: hexanes/ethyl acetate = 19/1) as a colorless oil (59 mg, 69%).

<sup>1</sup>H NMR (500 MHz; CDCl<sub>3</sub>): δ 7.69 – 7.61 (m, 2H), 7.40 – 7.34 (m, 2H), 7.32 – 7.19 (m, 4H), 4.27 – 4.13 (m, 2H), 2.87 (dd, *J* = 8.7, 3.9 Hz, 2H), 2.59 (ddd, *J* = 12.2, 7.6, 4.7 Hz, 1H), 2.51 (dd, *J* = 19.0, 8.7 Hz, 1H), 2.44 – 2.38 (m, 1H), 2.34 – 2.23 (m, 2H), 2.23 – 1.92 (m, 6H), 1.74 – 1.35 (m, 6H), 0.91 (s, 3H).

<sup>13</sup>C NMR (126 MHz; CDCl<sub>3</sub>): δ 220.71, 143.71, 140.19, 136.45, 132.21, 129.03, 128.18, 127.43, 125.33, 125.23, 120.17, 90.57, 85.03, 80.95, 68.41, 50.48, 47.93, 44.41, 43.05, 37.96, 35.82, 31.53, 29.05, 26.32, 25.86, 25.58, 21.56, 13.82.

HRMS calculated for C<sub>30</sub>H<sub>33</sub>O<sub>2</sub> [M+H]<sup>+</sup>: 425.2481, Found: 425.2480

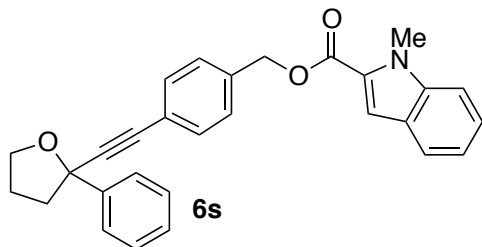

**6s** was synthesized with 4 mol % IPrAuNTf<sub>2</sub>, 3 equiv. alkyne, 40 °C, 1.5h, in CHCl<sub>3</sub>.

The title compound was isolated via flash chromatography on silica gel (Elution: hexanes/ethyl acetate = 15/1) as a white solid (69 mg, 79%).

MW= 435.52

**<sup>1</sup>H NMR** (500 MHz; CDCl<sub>3</sub>): δ 7.69 – 7.61 (m, 3H), 7.47 (d, *J* = 8.2 Hz, 2H), 7.42 – 7.33 (m, 7H), 7.30 – 7.27 (m, 1H), 7.16 – 7.13 (m, 1H), 5.34 (s, 2H), 4.30 – 4.12 (m, 2H), 4.07 (s, 3H), 2.61 (ddd, *J* = 12.2, 7.5, 4.8 Hz, 1H), 2.34 – 2.21 (m, 1H), 2.21 – 2.13 (m, 1H), 2.13 – 2.01 (m, 1H).

**<sup>13</sup>C NMR** (126 MHz; CDCl<sub>3</sub>): δ 178.32, 161.85, 143.57, 139.77, 136.20, 131.97, 128.24, 127.79, 127.52, 125.82, 125.30, 125.15, 122.80, 122.62, 120.62, 110.61, 110.25, 91.78, 84.59, 80.91, 68.51, 65.68, 43.00, 31.63, 25.87.

**HRMS** calculated for C<sub>29</sub>H<sub>26</sub>NO<sub>3</sub> [M+H]<sup>+</sup>: 436.1913, Found: 436.1897

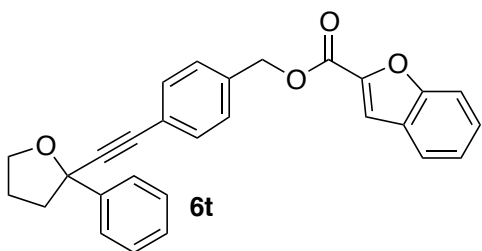

**6t** was synthesized with 4 mol % IPrAuNTf<sub>2</sub>, 3 equiv. alkyne, 40 °C, 6h, in CHCl<sub>3</sub>.

The title compound was isolated via flash chromatography on silica gel (Elution: hexanes/ethyl acetate = 15/1) as a colorless oil (80 mg, 95%).

**<sup>1</sup>H NMR** (500 MHz; CDCl<sub>3</sub>): δ 7.68 (d, *J* = 7.8 Hz, 1H), 7.66 – 7.62 (m, 2H), 7.62 – 7.55 (m, 2H), 7.52 – 7.35 (m, 7H), 7.35 – 7.27 (m, 2H), 5.40 (s, 2H), 4.32 – 4.10 (m, 2H), 2.61 (ddd, *J* = 12.2, 7.5, 4.8 Hz, 1H), 2.36 – 1.97 (m, 3H).

**<sup>13</sup>C NMR** (126 MHz; CDCl<sub>3</sub>): 159.30, 155.81, 145.19, 143.53, 135.43, 132.00, 128.24, 128.17, 127.76, 127.52, 126.87, 125.28, 123.83, 123.12, 122.85, 114.34, 112.39, 91.94, 84.49, 80.89, 68.51, 66.53, 42.98, 25.86.

**HRMS** calculated for C<sub>28</sub>H<sub>23</sub>O<sub>4</sub> [M+H]<sup>+</sup>: 423.1596, Found: 423.1586

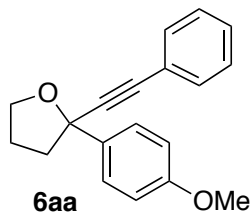

**6aa** was synthesized with 4 mol % IPrAuNTf<sub>2</sub>, 3 equiv. alkyne, 40 °C, 4h, in CHCl<sub>3</sub>.  
The title compound was isolated via flash chromatography on silica gel (Elution: hexanes/ethyl acetate = 20/1) as a yellow oil (37 mg, 67%).

**<sup>1</sup>H NMR** (500 MHz; CDCl<sub>3</sub>): δ 7.57 (d, *J* = 8.8 Hz, 2H), 7.47 – 7.43 (m, 2H), 7.33 – 7.26 (m, 3H), 6.90 (d, *J* = 8.8 Hz, 2H), 4.27 – 4.11 (m, 2H), 3.81 (s, 3H), 2.57 (ddd, *J* = 11.9, 7.5, 4.5 Hz, 1H), 2.37 – 2.01 (m, 3H).

**<sup>13</sup>C NMR** (126 MHz; CDCl<sub>3</sub>): δ 158.99, 135.65, 131.72, 128.19, 128.17, 126.62, 122.90, 113.53, 91.34, 84.93, 80.65, 68.27, 55.29, 42.82, 25.85.

**HRMS** calculated for C<sub>19</sub>H<sub>19</sub>O<sub>2</sub> [M+H]<sup>+</sup>: 279.1385, Found: 279.1393

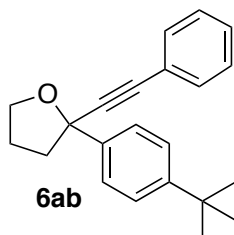

**6ab** was synthesized with 4 mol % IPrAuNTf<sub>2</sub>, 3 equiv. alkyne, 40 °C, 4h, in CHCl<sub>3</sub>.

The title compound was isolated via flash chromatography on silica gel (Elution: hexanes/ethyl acetate = 50/1) as a yellow oil (51 mg, 83%).

**<sup>1</sup>H NMR** (500 MHz; CDCl<sub>3</sub>): δ 7.57 (d, *J* = 8.5 Hz, 2H), 7.47 – 7.44 (m, 2H), 7.39 (d, *J* = 8.5 Hz, 2H), 7.31 – 7.28 (m, 3H), 4.26 – 4.13 (m, 2H), 2.59 (ddd, *J* = 12.2, 7.3, 4.6 Hz, 1H), 2.33 – 2.16 (m, 2H), 2.12 – 2.04 (m, 1H), 1.33 (s, 9H).

**<sup>13</sup>C NMR** (126 MHz; CDCl<sub>3</sub>): δ 150.35, 140.50, 131.73, 128.15, 126.10, 125.13, 125.04, 122.97, 91.47, 84.82, 80.77, 77.25, 77.00, 76.74, 68.38, 42.74, 34.48, 31.35, 31.25, 25.90.

**HRMS** calculated for C<sub>22</sub>H<sub>25</sub>O [M+H]<sup>+</sup>: 305.1905, Found: 305.1903

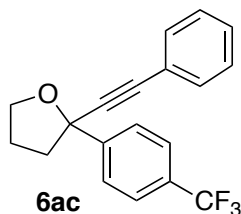

**6ac** was synthesized with 4 mol % IPrAuNTf<sub>2</sub>, 3 equiv. alkyne, 40 °C, 2.5h, in CHCl<sub>3</sub>.

The title compound was isolated via flash chromatography on silica gel (Elution: hexanes/ethyl acetate = 20/1) as a yellow oil (47 mg, 74%).

**<sup>1</sup>H NMR** (400 MHz; CDCl<sub>3</sub>): δ 7.74 (d, *J* = 8.2 Hz, 2H), 7.61 (d, *J* = 8.3 Hz, 2H), 7.45 – 7.41 (m, 2H), 7.32 – 7.27 (m, 3H), 4.33 – 4.10 (m, 2H), 2.62 (ddd, *J* = 11.4, 7.5, 4.3 Hz, 1H), 2.37 – 2.20 (m, 1H), 2.20 – 1.99 (m, 2H).

**<sup>13</sup>C NMR** (101 MHz; CDCl<sub>3</sub>): δ 147.75, 131.72, 129.69 (q, *J*<sub>C-F</sub> = 32.26 Hz), 128.47, 128.22, 125.66, 125.48, 125.21 (q, *J*<sub>C-F</sub> = 3.31 Hz), 122.44, 90.42, 85.41, 80.50, 68.65, 43.10, 25.81.

**HRMS** calculated for C<sub>19</sub>H<sub>16</sub>F<sub>3</sub>O [M+H]<sup>+</sup>: 317.1153, Found: 317.1152

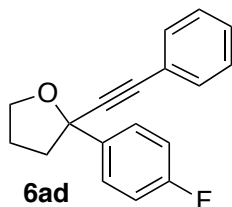

**6ad** was synthesized with 4 mol % IPrAuNTf<sub>2</sub>, 3 equiv. alkyne, 40 °C, 4h, in CHCl<sub>3</sub>.  
The title compound was isolated via flash chromatography on silica gel (Elution: hexanes/ethyl acetate = 50/1) as a pale-yellow oil (42 mg, 78%).

<sup>1</sup>H NMR (400 MHz; CDCl<sub>3</sub>): δ 7.64 – 7.55 (m, 2H), 7.47 – 7.39 (m, 2H), 7.31 – 7.26 (m, 3H), 7.03 (t, *J* = 8.7 Hz, 2H), 4.31 – 4.07 (m, 2H), 2.64 – 2.50 (m, 1H), 2.37 – 2.20 (m, 1H), 2.20 – 2.00 (m, 2H).

<sup>13</sup>C NMR (101 MHz; CDCl<sub>3</sub>): δ 162.18 (d, *J*<sub>C-F</sub> = 245.67 Hz), 139.39, 131.70, 128.33, 128.19, 127.09 (d, *J*<sub>C-F</sub> = 8.07 Hz), 122.66, 114.95 (d, *J*<sub>C-F</sub> = 21.47 Hz), 90.88, 85.18, 80.50, 68.40, 43.07, 25.82.

HRMS calculated for C<sub>18</sub>H<sub>16</sub>FO [M+H]<sup>+</sup>: 267.1185, Found: 267.1145

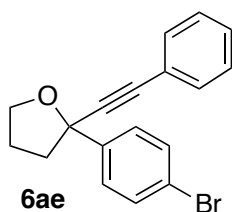

**6ae** was synthesized with 4 mol % IPrAuNTf<sub>2</sub>, 3 equiv. alkyne, 40 °C, 2.5h, in CHCl<sub>3</sub>.  
The title compound was isolated via flash chromatography on silica gel (Elution: hexanes/ethyl acetate = 20/1) as a pale-yellow oil (58 mg, 88%).

MW=327.22

<sup>1</sup>H NMR (400 MHz; CDCl<sub>3</sub>): δ 7.55 – 7.39 (m, 6H), 7.32 – 7.26 (m, 3H), 4.27 – 4.07 (m, 2H), 2.57 (ddd, *J* = 11.2, 7.5, 4.0 Hz, 1H), 2.33 – 2.18 (m, 1H), 2.18 – 1.97 (m, 2H).

<sup>13</sup>C NMR (101 MHz; CDCl<sub>3</sub>): δ 142.82, 131.71, 131.27, 128.38, 128.20, 127.14, 122.57, 121.41, 90.61, 85.23, 80.47, 68.50, 43.00, 25.80.

HRMS calculated for C<sub>18</sub>H<sub>16</sub>BrO [M+H]<sup>+</sup>: 327.0385, Found: 327.0366

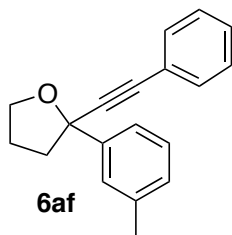

**6af** was synthesized with 4 mol % IPrAuNTf<sub>2</sub>, 3 equiv. alkyne, 40 °C, 4h, in CHCl<sub>3</sub>.  
The title compound was isolated via flash chromatography on silica gel (Elution: hexanes/ethyl acetate = 50/1) as a pale-yellow oil (40 mg, 76%).

<sup>1</sup>H NMR (500 MHz; CDCl<sub>3</sub>): δ 7.49 – 7.41 (m, 4H), 7.36 – 7.23 (m, 4H), 7.11 (d, *J* = 7.6 Hz, 1H), 4.27 – 4.14 (m, 2H), 2.60 (ddd, *J* = 12.2, 7.6, 4.6 Hz, 1H), 2.39 (s, 3H), 2.36 – 2.15 (m, 2H), 2.12 – 2.01 (m, 1H).

<sup>13</sup>C NMR (126 MHz; CDCl<sub>3</sub>): δ 143.53, 137.85, 131.75, 128.24, 128.20, 128.16, 128.13, 125.89, 122.93, 122.44, 91.38, 84.84, 80.88, 68.39, 42.91, 25.84, 21.58.

HRMS calculated for C<sub>19</sub>H<sub>19</sub>O [M+H]<sup>+</sup>: 263.1436, Found: 263.1433



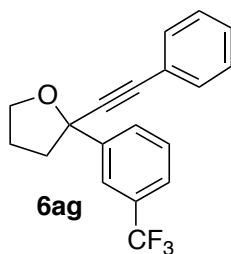

**6ag** was synthesized with 4 mol% IPrAuNTf<sub>2</sub>, 3 equiv. alkyne, 60 °C, 3h, in CHCl<sub>3</sub>. The title compound was isolated via flash chromatography on silica gel (Elution: hexanes/ethyl acetate = 20/1) as a yellow oil (51 mg, 81%).

**<sup>1</sup>H NMR** (500 MHz; CDCl<sub>3</sub>): δ 7.91 (s, 1H), 7.84 (d, *J* = 7.8 Hz, 1H), 7.56 (d, *J* = 7.8 Hz, 1H), 7.53 – 7.42 (m, 3H), 7.36 – 7.27 (m, 3H), 4.33 – 4.16 (m, 2H), 2.71 – 2.58 (m, 1H), 2.40 – 2.24 (m, 1H), 2.21 – 1.99 (m, 2H).

**<sup>13</sup>C NMR** (126 MHz; CDCl<sub>3</sub>): δ 144.83, 131.75, 130.72 (q, *J*<sub>C-F</sub> = 32.24 Hz), 128.88, 128.72, 128.49, 128.25, 124.38 (q, *J*<sub>C-F</sub> = 3.41 Hz), 124.16 (q, *J*<sub>C-F</sub> = 272.15 Hz), 122.47, 122.14 (q, *J*<sub>C-F</sub> = 3.58 Hz), 90.40, 85.50, 80.51, 68.63, 43.16, 25.84.

**HRMS** calculated for C<sub>19</sub>H<sub>16</sub>F<sub>3</sub>O [M+H]<sup>+</sup>: 317.1153, Found: 317.1151

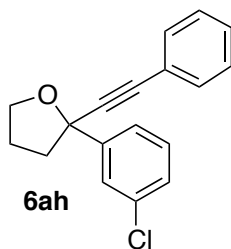

**6ah** was synthesized with 4 mol % IPrAuNTf<sub>2</sub>, 3 equiv. alkyne, 40 °C, 4h, in CHCl<sub>3</sub>.

The title compound was isolated via flash chromatography on silica gel (Elution: hexanes/ethyl acetate = 50/1) as a pale-yellow oil (48 mg, 84%).

**<sup>1</sup>H NMR** (400 MHz; CDCl<sub>3</sub>): δ 7.61 (s, 1H), 7.55 – 7.47 (m, 1H), 7.46 – 7.41 (m, 2H), 7.32 – 7.22 (m, 5H), 4.29 – 4.08 (m, 2H), 2.58 (ddd, *J* = 11.7, 7.5, 4.5 Hz, 1H), 2.35 – 2.19 (m, 1H), 2.19 – 1.96 (m, 2H).

**<sup>13</sup>C NMR** (101 MHz; CDCl<sub>3</sub>): δ 145.82, 134.14, 131.73, 129.50, 128.39, 128.19, 127.62, 125.55, 123.58, 122.55, 90.54, 85.26, 80.39, 68.58, 43.08, 25.80.

**HRMS** calculated for C<sub>18</sub>H<sub>16</sub>ClO [M+H]<sup>+</sup>: 283.0890, Found: 283.0891

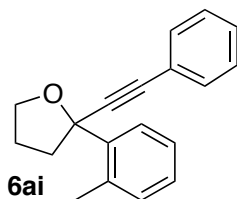

**6ai** was synthesized with 4 mol % IPrAuNTf<sub>2</sub>, 3 equiv. alkyne, 40 °C, 4h, in CHCl<sub>3</sub>.

The title compound was isolated via flash chromatography on silica gel (Elution: hexanes/ethyl acetate = 50/1) as a colorless oil (49 mg, 93%).

**<sup>1</sup>H NMR** (400 MHz; CDCl<sub>3</sub>): δ 7.67 (dd, *J* = 6.1, 2.9 Hz, 1H), 7.41 – 7.33 (m, 2H), 7.28 – 7.22 (m, 3H), 7.18 (d, *J* = 2.9 Hz, 3H), 4.30 – 4.17 (m, 1H), 4.13 – 3.97 (m, 1H), 2.79 – 2.69 (m, 1H), 2.61 (s, 3H), 2.30 – 2.15 (m, 2H), 2.07 – 1.94 (m, 1H).

**<sup>13</sup>C NMR** (101 MHz; CDCl<sub>3</sub>): δ 141.45, 135.17, 131.70, 131.59, 128.11, 127.80, 127.40, 125.61, 124.51, 122.95, 91.09, 84.05, 79.78, 67.49, 40.36, 25.70, 21.08.

**HRMS** calculated for C<sub>19</sub>H<sub>19</sub>O [M+H]<sup>+</sup>: 263.1436, Found: 263.1438

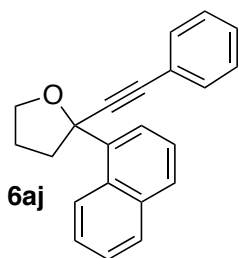

**6aj** was synthesized with 4 mol % IPrAuNTf<sub>2</sub>, 3 equiv. alkyne, 40 °C, 4h, in CHCl<sub>3</sub>.  
The title compound was isolated via flash chromatography on silica gel (Elution: hexanes/ethyl acetate = 50/1) as a pale-yellow oil (48 mg, 81%).

<sup>1</sup>H NMR (400 MHz; CDCl<sub>3</sub>): δ 7.63 (d, *J* = 8.5 Hz, 1H), 7.86 (dd, *J* = 7.3, 3.2 Hz, 2H), 7.80 (d, *J* = 8.2 Hz, 1H), 7.58 – 7.42 (m, 3H), 7.40 – 7.32 (m, *J* = 6.6, 3.0 Hz, 2H), 7.26 – 7.19 (m, 3H), 4.37 – 4.09 (m, 2H), 3.00 – 2.87 (m, 1H), 2.56 – 2.42 (m, 1H), 2.42 – 2.20 (m, 1H), 2.08 – 1.93 (m, 1H).

<sup>13</sup>C NMR (101 MHz; CDCl<sub>3</sub>): δ 138.97, 134.50, 131.64, 130.09, 128.76, 128.59, 128.13, 128.08, 126.10, 125.42, 125.29, 125.04, 122.88, 122.19, 91.95, 84.93, 79.66, 67.76, 41.31, 25.83.

HRMS calculated for C<sub>22</sub>H<sub>19</sub>O [M+H]<sup>+</sup>: 299.1436, Found: 299.1433

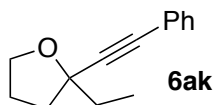

**6ak** was synthesized with 4 mol % IPrAuNTf<sub>2</sub>, 3 equiv. alkyne, 40 °C, 1.5h, in CHCl<sub>3</sub>.  
The title compound was isolated via flash chromatography on silica gel (Elution: hexanes/ethyl acetate = 20/1) as a colorless oil (36 mg, 91%).

<sup>1</sup>H NMR (400 MHz; CDCl<sub>3</sub>): δ 7.42 – 7.38 (m, 2H), 7.30 – 7.24 (m, 3H), 4.08 – 3.86 (m, 2H), 2.28 – 2.08 (m, 2H), 1.99 – 1.70 (m, 4H), 1.11 (t, *J* = 7.4 Hz, 3H).

<sup>13</sup>C NMR (101 MHz; CDCl<sub>3</sub>): δ 131.48, 127.93, 127.79, 122.91, 91.17, 83.68, 80.41, 67.37, 38.17, 33.60, 25.30, 9.48.

HRMS calculated for C<sub>14</sub>H<sub>17</sub>O [M+H]<sup>+</sup>: 201.1279, Found: 201.1274

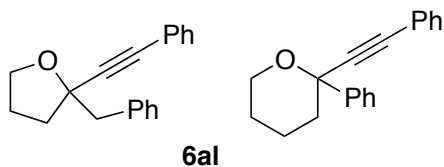

**6al** was synthesized with 4 mol % IPrAuNTf<sub>2</sub>, 3 equiv. alkyne, 40 °C, 1.5h, in CHCl<sub>3</sub>.  
The title compound was isolated as a mixture of isomers via flash chromatography on silica gel (Elution: hexanes/ethyl acetate = 33/1) as a yellow oil (46 mg, 87%, 10:3 *exo:endo* mixture).

<sup>1</sup>H NMR (400 MHz; CDCl<sub>3</sub>): 7.50 – 7.08 (m, 10H), 4.37 – 4.06 (m, 0.26H, *endo*), 4.06 – 3.80 (m, 1.74H), 3.18 – 3.03 (m, 1H), 2.24 – 1.78 (m, 5H).

<sup>13</sup>C NMR (126 MHz; CDCl<sub>3</sub>): δ 149.63, 145.10, 143.48, 136.99, 135.86, 134.95, 131.58, 130.60, 129.45, 128.14, 128.06, 127.89, 127.17, 126.60, 126.15, 122.99, 121.18, 119.11, 93.44, 91.49, 84.80, 79.92, 69.76, 67.84, 46.50, 38.05, 33.88, 27.02, 25.51, 11.27.

HRMS calculated for C<sub>19</sub>H<sub>19</sub>O [M+H]<sup>+</sup>: 263.14359, Found: 263.1431

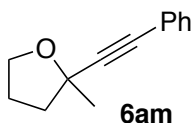

**6am** was synthesized with 4 mol % IPrAuNTf<sub>2</sub>, 3 equiv. alkyne, 40 °C, 2.5h, in CHCl<sub>3</sub>. The title compound was isolated via flash chromatography on silica gel (Elution: hexanes/ethyl acetate = 25/1) as a colorless oil (31 mg, 84%).

<sup>1</sup>H NMR (500 MHz; CDCl<sub>3</sub>): δ 7.44 – 7.40 (m, 2H), 7.30 – 7.27 (m, 3H), 4.06 – 3.91 (m, 2H), 2.30 (ddd, *J* = 12.2, 8.2, 4.4 Hz, 1H), 2.22 – 2.09 (m, 1H), 2.05 – 1.95 (m, 1H), 1.92 – 1.81 (m, 1H), 1.64 (s, 3H).

<sup>13</sup>C NMR (126 MHz; CDCl<sub>3</sub>): δ 131.66, 128.14, 128.04, 122.98, 92.33, 82.70, 76.39, 67.64, 40.16, 27.70, 25.70.

HRMS calculated for C<sub>13</sub>H<sub>15</sub>O [M+H]<sup>+</sup>: 187.1123, Found: 187.1117

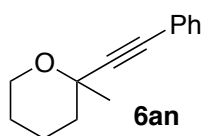

**6an** was synthesized with 4 mol % IPrAuNTf<sub>2</sub>, 3 equiv. alkyne, 40 °C, 4h, in CHCl<sub>3</sub>.

The title compound was isolated via flash chromatography on silica gel (Elution: hexanes/ethyl acetate = 30/1) as a pale-yellow oil (37 mg, 93%).

<sup>1</sup>H NMR (500 MHz; CDCl<sub>3</sub>): δ 7.48 – 7.42 (m, 2H), 7.33 – 7.28 (m, 3H), 4.02 (td, *J* = 11.5, 3.6 Hz, 1H), 3.85 – 3.78 (m, 1H), 1.96 – 1.83 (m, 2H), 1.76 – 1.69 (m, 1H), 1.61 – 1.53 (m, 6H).

<sup>13</sup>C NMR (126 MHz; CDCl<sub>3</sub>): δ 131.70, 128.22, 128.13, 122.97, 90.28, 85.66, 70.71, 64.20, 38.09, 30.05, 25.47, 20.76.

HRMS calculated for C<sub>14</sub>H<sub>17</sub>O [M+H]<sup>+</sup>: 201.1279, Found: 201.1273

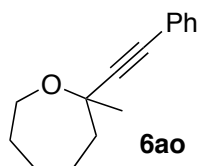

**6ao** was synthesized with 4 mol % IPrAuNTf<sub>2</sub>, 3 equiv. alkyne, 40 °C, 4h, in CHCl<sub>3</sub>.

The title compound was isolated via flash chromatography on silica gel (Elution: hexanes/ethyl acetate = 40/1) as a pale-yellow oil (34 mg, 79%).

<sup>1</sup>H NMR (500 MHz; CDCl<sub>3</sub>): δ 7.46 – 7.40 (m, 2H), 7.32 – 7.28 (m, 3H), 3.87 (ddd, *J* = 11.9, 8.6, 3.1 Hz, 1H), 3.75 (dt, *J* = 12.7, 4.0 Hz, 1H), 2.09 (dd, *J* = 14.7, 9.4 Hz, 1H), 1.96 (dd, *J* = 14.7, 8.2 Hz, 1H), 1.77 – 1.57 (m, 5H), 1.57 – 1.40 (m, 4H).

<sup>13</sup>C NMR (126 MHz; CDCl<sub>3</sub>): δ 131.70, 128.17, 128.02, 123.09, 93.08, 83.07, 73.27, 64.88, 42.51, 30.86, 29.29, 28.47, 23.01.

HRMS calculated for C<sub>15</sub>H<sub>19</sub>O [M+H]<sup>+</sup>: 215.1436, Found: 215.1425

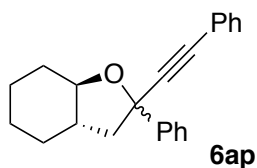

**6ap** was synthesized with 4 mol % IPrAuNTf<sub>2</sub>, 3 equiv. alkyne, 40 °C, 4h, in CHCl<sub>3</sub>.

The title compound was isolated as a mixture of isomers via flash chromatography on silica gel (Elution: hexanes/ethyl acetate = 25/1) as a colorless oil (40 mg, 66%, 1:1 dr).

<sup>1</sup>H NMR (500 MHz; CDCl<sub>3</sub>): δ 7.69 – 7.60 (m, 2H), 7.50 – 7.43 (m, 2H), 7.37 (td, *J* = 7.7, 3.1 Hz, 2H), 7.32 – 7.27 (m, 4H), 3.64 (td, *J* = 10.7, 3.8 Hz, 0.5H), 3.51 – 3.39 (m, 0.5H), 2.77 (dd, *J* = 11.4, 5.2 Hz, 0.5H), 2.51 – 2.35 (m, 1H), 2.33 – 2.22 (m, 1H), 2.13 – 1.85 (m, 3.5H), 1.76 (dd, *J* = 6.4, 3.1 Hz, 1H), 1.63 – 1.50 (m, 1H), 1.44 – 1.08 (m, 3H).

<sup>13</sup>C NMR (126 MHz; CDCl<sub>3</sub>): δ 145.65, 145.30, 131.77, 131.73, 128.32, 128.15, 128.11, 128.05, 127.25, 127.19, 125.48, 124.92, 123.04, 123.01, 93.33, 92.92, 85.17, 84.16, 84.00, 79.81, 78.99, 49.91, 49.76, 46.31, 44.25, 31.83, 31.12, 28.65, 25.70, 25.54, 24.33, 24.26.

HRMS calculated for C<sub>22</sub>H<sub>23</sub>O [M+H]<sup>+</sup>: 303.1749, Found: 303.1761

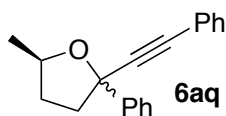

**6aq** was synthesized with 4 mol % IPrAuNTf<sub>2</sub>, 3 equiv. alkyne, 40 °C, 4h, in CHCl<sub>3</sub>.

The title compound was isolated as a mixture of isomers via flash chromatography on silica gel (Elution: hexanes/ethyl acetate = 30/1) as a colorless oil (50 mg, 95%, 3:2 dr).

<sup>1</sup>H NMR (400 MHz; CDCl<sub>3</sub>): δ 7.71 – 7.59 (m, 2H), 7.49 – 7.18 (m, 8H), 4.59 – 4.47 (m, 0.6H), 4.46 – 4.34 (m, 0.4H), 2.70 – 2.53 (m, 1H), 2.40 – 2.14 (m, 2H), 2.08 – 1.95 (m, 0.4H), 1.72 – 1.56 (m, 0.6H), 1.46 (d, *J* = 6.1 Hz, 1.2H), 1.40 (d, *J* = 6.1 Hz, 1.8H).

<sup>13</sup>C NMR (101 MHz; CDCl<sub>3</sub>): δ 144.22, 143.96, 131.72, 131.62, 128.14, 127.39, 127.34, 125.37, 125.19, 123.05, 122.93, 92.56, 91.78, 84.80, 84.63, 81.04, 80.74, 75.70, 44.02, 43.27, 34.28, 32.89, 22.39, 21.04.

HRMS calculated for C<sub>19</sub>H<sub>19</sub>O [M+H]<sup>+</sup>: 263.1436, Found: 263.1430

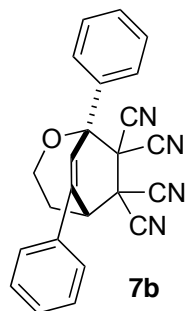

**7b** was synthesized using general procedure B.

The title compound was isolated via flash chromatography on silica gel (Elution: hexanes/ethyl acetate = 3/1) as a yellow oil (107 mg, 71% yield) and crystallized by slow evaporation of a CHCl<sub>3</sub>/DCM/Hexanes solution at room temperature.

<sup>1</sup>H NMR (400 MHz; CDCl<sub>3</sub>): δ 7.83 – 7.76 (m, 2H), 7.61 – 7.45 (m, 8H), 6.75 (s, 1H), 4.19 – 4.10 (m, 2H), 3.80 (td, *J* = 12.3, 4.0 Hz, 1H), 2.93 – 2.81 (m, 1H), 2.08 – 1.97 (m, 1H).

<sup>13</sup>C NMR (126 MHz; CDCl<sub>3</sub>): δ 144.83, 136.45, 135.11, 130.78, 130.36, 129.61, 128.72, 127.18, 125.89, 122.74, 112.92, 111.35, 111.22, 110.28, 81.89, 62.09, 47.12, 45.49, 29.70, 29.09.

HRMS calculated for C<sub>24</sub>H<sub>17</sub>N<sub>4</sub>O [M+H]<sup>+</sup>: 377.1402, Found: 377.1394

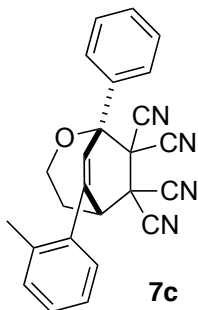

**7c** was synthesized using general procedure B.

The title compound was isolated via flash chromatography on silica gel (Elution: hexanes/ethyl acetate = 3/1) as a yellow oil (114 mg, 73% yield).

**<sup>1</sup>H NMR** (400 MHz; CDCl<sub>3</sub>): δ 7.79 – 7.71 (m, 2H), 7.56 – 7.47 (m, 3H), 7.39 – 7.19 (m, 4H), 6.56 (s, 1H), 4.24 (dd, *J* = 12.8, 6.8 Hz, 1H), 3.95 (td, *J* = 12.2, 4.3 Hz, 1H), 3.88 – 3.82 (m, 1H), 3.01 – 2.86 (m, 1H), 2.55 (s, 3H), 2.21 – 2.01 (m, 1H).

**<sup>13</sup>C NMR** (126 MHz; CDCl<sub>3</sub>): δ 144.81, 136.32, 136.03, 135.40, 131.73, 130.36, 129.78, 128.77, 127.80, 127.07, 126.85, 126.72, 113.04, 111.55, 111.25, 110.22, 81.97, 62.50, 56.15, 48.52, 45.11, 29.60, 20.89.

**HRMS** calculated for C<sub>25</sub>H<sub>19</sub>N<sub>4</sub>O [M+H]<sup>+</sup>: 391.1559, Found: 391.1563

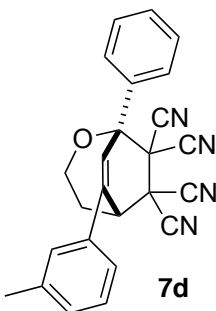

**7d** was synthesized using general procedure B.

The title compound was isolated via flash chromatography on silica gel (Elution: hexanes/ethyl acetate = 3/1) as a yellow oil (95 mg, 61% yield).

**<sup>1</sup>H NMR** (500 MHz; CDCl<sub>3</sub>): δ 7.83 – 7.71 (m, 2H), 7.57 – 7.45 (m, 3H), 7.45 – 7.27 (m, 4H), 6.72 (s, 1H), 4.18 – 4.07 (m, 2H), 3.79 (td, *J* = 12.3, 4.0 Hz, 1H), 2.95 – 2.80 (m, 1H), 2.42 (s, 3H), 2.08 – 1.99 (m, 1H).

**<sup>13</sup>C NMR** (126 MHz; CDCl<sub>3</sub>): δ 144.89, 139.48, 136.47, 135.09, 131.54, 130.32, 129.46, 128.70, 127.17, 126.46, 122.96, 122.43, 112.87, 111.31, 111.20, 110.23, 81.86, 62.03, 47.13, 45.45, 35.85, 29.10, 21.47.

**HRMS** calculated for C<sub>25</sub>H<sub>19</sub>N<sub>4</sub>O [M+H]<sup>+</sup>: 391.1559, Found: 391.1547

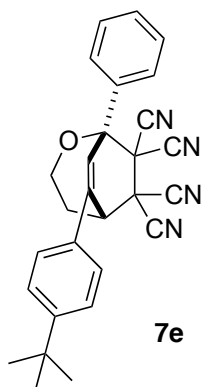

**7e** was synthesized using general procedure B.

The title compound was isolated via flash chromatography on silica gel (Elution: hexanes/ethyl acetate = 3/1) as a yellow oil (112 mg, 65% yield).

**<sup>1</sup>H NMR** (400 MHz; CDCl<sub>3</sub>): δ 7.89 – 7.68 (m, 2H), 7.68 – 7.44 (m, 7H), 6.72 (s, 1H), 4.28 – 4.01 (m, 2H), 3.90 – 3.64 (m, 1H), 2.99 – 2.73 (m, 1H), 2.15 – 1.89 (m, 1H), 1.45 – 1.27 (m, 9H).

**<sup>13</sup>C NMR** (101 MHz; CDCl<sub>3</sub>): 154.43, 144.53, 136.54, 132.06, 130.28, 128.67, 127.16, 126.54, 125.58, 121.66, 112.89, 111.33, 111.24, 110.27, 81.91, 62.04, 61.99, 46.95, 45.46, 34.96, 34.92, 31.39, 31.10, 29.06.

**HRMS** calculated for C<sub>28</sub>H<sub>25</sub>N<sub>4</sub>O [M+H]<sup>+</sup>: 433.2028, Found: 433.2012

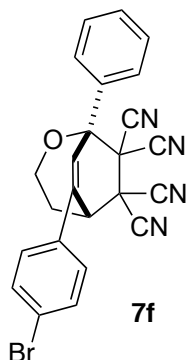

**7f** was synthesized using general procedure B.

The title compound was isolated via flash chromatography on silica gel (Elution: hexanes/ethyl acetate = 3/1) as a yellow solid (122 mg, 67% yield).

**<sup>1</sup>H NMR** (500 MHz; CDCl<sub>3</sub>): δ 7.81 – 7.77 (m, 2H), 7.65 (d, *J* = 8.3 Hz, 2H), 7.56 – 7.51 (m, 3H), 7.43 (d, *J* = 8.3 Hz, 2H), 6.78 (s, 1H), 4.22 – 4.08 (m, 2H), 3.78 (td, *J* = 12.3, 3.8 Hz, 1H), 2.95 – 2.78 (m, 1H), 2.08 – 1.99 (m, 1H).

**<sup>13</sup>C NMR** (126 MHz; CDCl<sub>3</sub>): δ 143.83, 136.24, 133.94, 132.85, 130.45, 128.77, 127.40, 127.13, 125.32, 123.32, 112.87, 111.28, 111.07, 110.15, 81.85, 77.32, 77.07, 76.82, 62.09, 56.23, 46.98, 45.47, 29.03.

**HRMS** calculated for C<sub>24</sub>H<sub>16</sub>BrN<sub>4</sub>O [M+H]<sup>+</sup>: 455.0508, Found: 455.0490

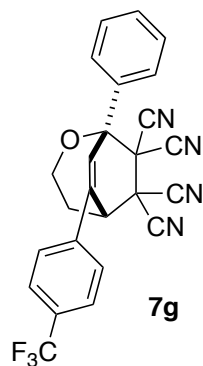

**7g** was synthesized using general procedure B.

The title compound was isolated via flash chromatography on silica gel (Elution: hexanes/ethyl acetate = 3/1) as a colorless oil (105 mg, 59% yield) and crystallized by slow evaporation of a  $\text{CDCl}_3$  solution at room temperature.

**$^1\text{H NMR}$**  (500 MHz;  $\text{CDCl}_3$ ):  $\delta$  7.82 – 7.73 (m, 4H), 7.66 (d,  $J = 8.2$  Hz, 2H), 7.55 – 7.49 (m, 3H), 6.84 (s, 1H), 4.24 – 4.08 (m, 2H), 3.79 (td,  $J = 12.3, 4.0$  Hz, 1H), 3.01 – 2.84 (m, 1H), 2.12 – 1.98 (m, 1H).

**$^{13}\text{C NMR}$**  (126 MHz;  $\text{CDCl}_3$ ):  $\delta$  138.50, 136.01, 132.63 (q,  $J_{\text{C-F}} = 33.08$  Hz), 130.54, 128.82, 127.89, 127.09, 126.66 (q,  $J_{\text{C-F}} = 3.22$  Hz), 126.40, 125.17, 123.49 (q,  $J_{\text{C-F}} = 272.64$  Hz), 112.83, 111.17, 110.92, 109.99, 81.77, 62.11, 56.23, 47.22, 45.46, 29.01.

**HRMS** calculated for  $\text{C}_{25}\text{H}_{16}\text{F}_3\text{N}_4\text{O}$   $[\text{M}+\text{H}]^+$ : 445.1276, Found: 445.1246

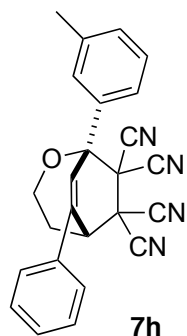

**7h** was synthesized using general procedure B.

The title compound was isolated via flash chromatography on silica gel (Elution: hexanes/ethyl acetate = 3/1) as a yellow solid (95 mg, 61% yield).

**$^1\text{H NMR}$**  (400 MHz;  $\text{CDCl}_3$ ): 7.64 – 7.27 (m, 9H), 6.74 (s, 1H), 4.18 – 4.08 (m, 2H), 3.79 (td,  $J = 12.2, 4.1$  Hz, 1H), 2.96 – 2.78 (m, 1H), 2.43 (s, 3H), 2.10 – 1.97 (m, 1H).

**$^{13}\text{C NMR}$**  (126 MHz;  $\text{CDCl}_3$ ):  $\delta$  144.68, 138.60, 136.38, 135.16, 131.08, 130.73, 129.59, 128.58, 127.70, 125.88, 124.24, 122.91, 112.92, 111.33, 111.23, 110.29, 81.86, 62.02, 56.33, 47.15, 45.53, 29.05, 21.68.

**HRMS** calculated for  $\text{C}_{25}\text{H}_{19}\text{N}_4\text{O}$   $[\text{M}+\text{H}]^+$ : 391.1559, Found: 391.2515

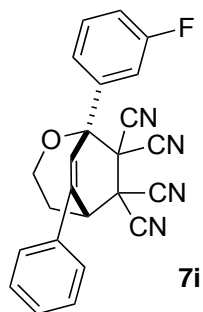

**7i** was synthesized using general procedure B.

The title compound was isolated via flash chromatography on silica gel (Elution: hexanes/ethyl acetate = 3/1) as a pale-yellow foam (107 mg, 68% yield).

**<sup>1</sup>H NMR** (500 MHz; CDCl<sub>3</sub>): δ 7.65 – 7.50 (m, 7H), 7.25 – 7.20 (m, 2H), 6.70 (d, *J* = 1.1 Hz, 1H), 4.30 – 4.09 (m, 2H), 3.82 (td, *J* = 12.3, 4.1 Hz, 1H), 3.01 – 2.60 (m, 1H), 2.16 – 1.99 (m, 1H).

**<sup>13</sup>C NMR** (126 MHz; CDCl<sub>3</sub>): δ 162.65 (d, *J*<sub>C-F</sub> = 248.16 Hz), 145.22, 138.95 (d, *J*<sub>C-F</sub> = 7.09 Hz), 134.89, 130.93, 130.39 (d, *J*<sub>C-F</sub> = 8.02 Hz), 129.65, 127.51 (d, *J*<sub>C-F</sub> = 199.51 Hz), 125.88, 122.88 (d, *J*<sub>C-F</sub> = 2.20 Hz), 122.13, 117.48 (d, *J*<sub>C-F</sub> = 21.04 Hz), 114.84 (d, *J*<sub>C-F</sub> = 24.33 Hz), 112.76, 111.11 (d, *J*<sub>C-F</sub> = 17.34 Hz), 110.01, 81.47, 62.23, 56.07, 47.14, 45.40, 29.03.

**HRMS** calculated for C<sub>24</sub>H<sub>16</sub>FN<sub>4</sub>O [M+H]<sup>+</sup>: 395.1308, Found: 395.1290

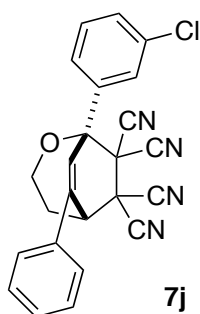

**7j** was synthesized using general procedure B.

The title compound was isolated via flash chromatography on silica gel (Elution: hexanes/ethyl acetate = 3/1) as a yellow oil (97 mg, 59% yield).

**<sup>1</sup>H NMR** (500 MHz; CDCl<sub>3</sub>): δ 7.81 (t, *J* = 1.7 Hz, 1H), 7.69 – 7.64 (m, 1H), 7.59 – 7.44 (m, 7H), 6.68 (s, 1H), 4.22 – 4.13 (m, 2H), 3.81 (td, *J* = 12.2, 4.1 Hz, 1H), 2.96 – 2.84 (m, 1H), 2.10 – 2.03 (m, 1H).

**<sup>13</sup>C NMR** (126 MHz; CDCl<sub>3</sub>): δ 145.30, 138.40, 135.04, 134.88, 130.94, 130.61, 129.96, 129.64, 127.53, 125.87, 125.35, 122.01, 112.72, 111.13, 111.00, 109.93, 81.43, 62.21, 47.18, 45.38, 29.69, 29.01.

**HRMS** calculated for C<sub>24</sub>H<sub>16</sub>ClN<sub>4</sub>O [M+H]<sup>+</sup>: 411.1013, Found: 411.0985



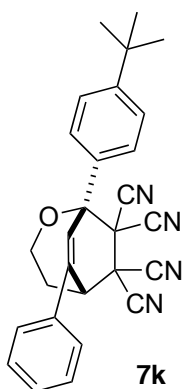

**7k** was synthesized using general procedure B.

The title compound was isolated via flash chromatography on silica gel (Elution: hexanes/ethyl acetate = 5/1) as a white solid (111 mg, 64% yield).

**<sup>1</sup>H NMR** (500 MHz; CDCl<sub>3</sub>): δ 7.80 – 7.69 (m, 2H), 7.61 – 7.48 (m, 7H), 6.78 (d, *J* = 1.1 Hz, 1H), 4.20 – 4.11 (m, 2H), 3.80 (td, *J* = 12.3, 4.0 Hz, 1H), 2.95 – 2.85 (m, 1H), 2.09 – 1.98 (m, 1H), 1.38 (s, 9H).

**<sup>13</sup>C NMR** (126 MHz; CDCl<sub>3</sub>): δ 153.54, 144.55, 135.16, 133.47, 130.74, 129.60, 126.96, 125.89, 125.69, 123.07, 113.03, 111.44, 111.28, 110.41, 81.90, 62.03, 56.34, 47.17, 45.53, 34.80, 31.22, 29.16.

**HRMS** calculated for C<sub>28</sub>H<sub>25</sub>N<sub>4</sub>O [M+H]<sup>+</sup>: 433.2028, Found: 433.2014

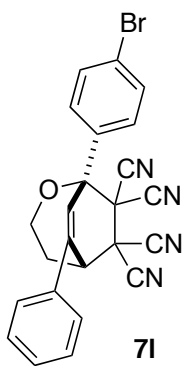

**7l** was synthesized using general procedure B.

The title compound was isolated via flash chromatography on silica gel (Elution: hexanes/ethyl acetate = 3/1) as a yellow solid (98 mg, 54% yield).

**<sup>1</sup>H NMR** (500 MHz; CDCl<sub>3</sub>): δ 7.65 (d, *J* = 9.2 Hz, 4H), 7.59 – 7.48 (m, 5H), 6.68 (s, 1H), 4.24 – 4.11 (m, 2H), 3.81 (td, *J* = 12.1, 4.0 Hz, 1H), 2.95 – 2.83 (m, 1H), 2.09 – 2.00 (m, 1H).

**<sup>13</sup>C NMR** (126 MHz; CDCl<sub>3</sub>): δ 145.26, 135.43, 134.92, 131.94, 130.92, 129.64, 128.87, 125.86, 125.19, 122.04, 112.74, 111.22, 111.01, 110.03, 81.69, 62.16, 47.17, 45.31, 29.69, 29.01.

**HRMS** calculated for C<sub>24</sub>H<sub>16</sub>BrN<sub>4</sub>O [M+H]<sup>+</sup>: 455.0508, Found: 455.0471

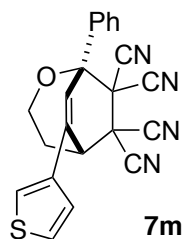

**7m** was synthesized using general procedure B.

The title compound was isolated via flash chromatography on silica gel (Elution: hexanes/ethyl acetate = 3/1) as a yellow solid (124 mg, 81% yield).

**<sup>1</sup>H NMR** (500 MHz; CDCl<sub>3</sub>): δ 7.71 (d, *J* = 2.0 Hz, 1H), 7.61 – 7.35 (m, 7H), 6.69 (s, 1H), 4.16 – 4.02 (m, 2H), 3.81 (td, *J* = 12.2, 4.0 Hz, 1H), 2.93 – 2.76 (m, 1H), 2.07 – 1.90 (m, 1H).

**<sup>13</sup>C NMR** (126 MHz; CDCl<sub>3</sub>): δ 144.67, 138.45, 134.92, 130.84, 129.61, 127.13, 126.23, 125.91, 122.89, 112.90, 111.39, 111.13, 110.35, 81.30, 62.12, 55.87, 47.12, 45.34, 29.14.

**HRMS** calculated for C<sub>22</sub>H<sub>15</sub>N<sub>4</sub>OS [M+H]<sup>+</sup>: 383.0967, Found: 383.0951

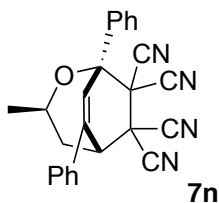

**7n** was synthesized using general procedure B.

The title compound was isolated via flash chromatography on silica gel (Elution: hexanes/ethyl acetate = 3/1) as a pale-yellow oil (116 mg, 74% yield).

**<sup>1</sup>H NMR** (500 MHz; CDCl<sub>3</sub>): δ 7.90 – 7.77 (m, 2H), 7.63 – 7.43 (m, 8H), 6.78 (s, 1H), 4.11 (d, *J* = 6.4 Hz, 1H), 4.06 – 3.97 (m, 1H), 2.55 (dd, *J* = 15.4, 10.7 Hz, 1H), 2.27 – 2.10 (m, 1H), 1.43 (d, *J* = 6.2 Hz, 3H).

**<sup>13</sup>C NMR** (126 MHz; CDCl<sub>3</sub>): δ 145.03, 136.70, 135.11, 130.70, 130.30, 129.58, 128.75, 127.14, 125.85, 123.55, 112.95, 111.39, 111.21, 110.26, 81.39, 77.30, 77.04, 76.79, 69.75, 56.34, 46.76, 45.32, 36.37, 20.27.

**HRMS** calculated for C<sub>25</sub>H<sub>19</sub>N<sub>4</sub>O [M+H]<sup>+</sup>: 391.1559, Found: 391.1542

## V. NMR Spectral Data

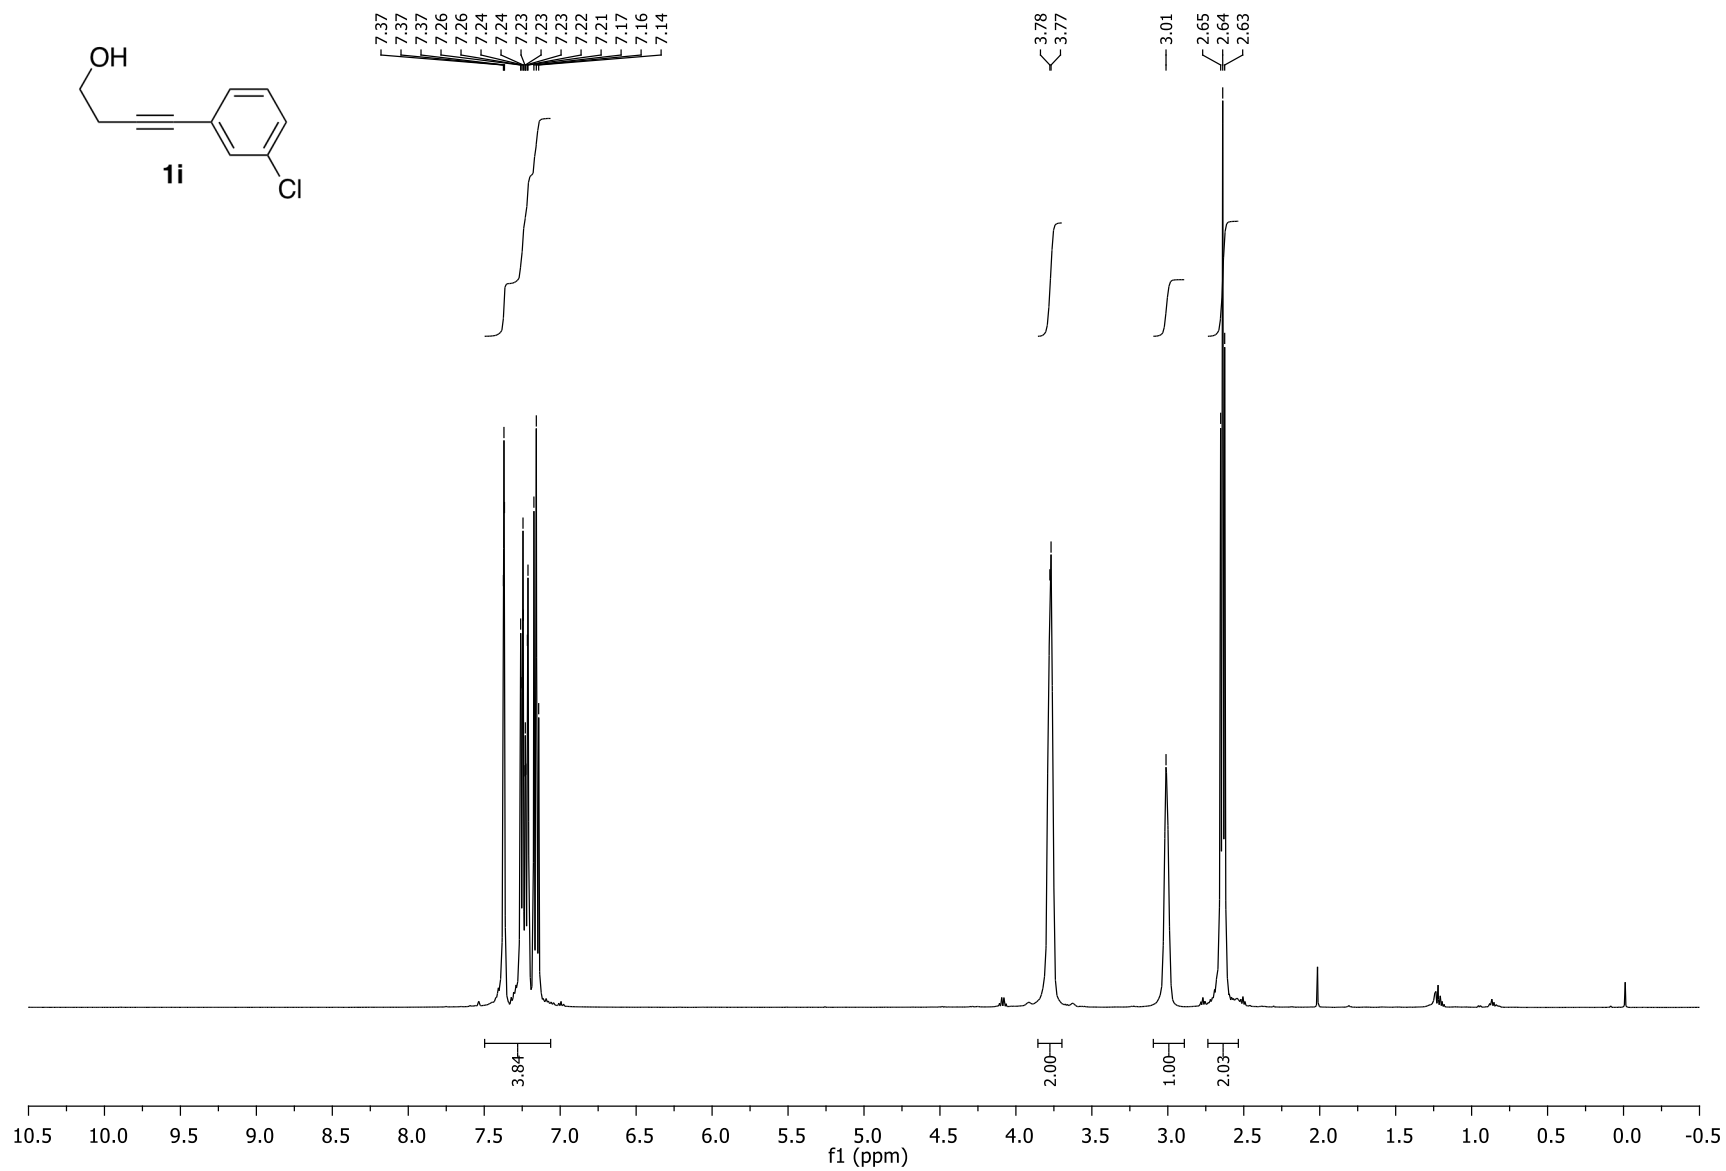

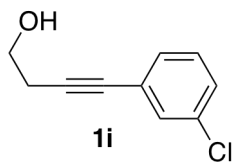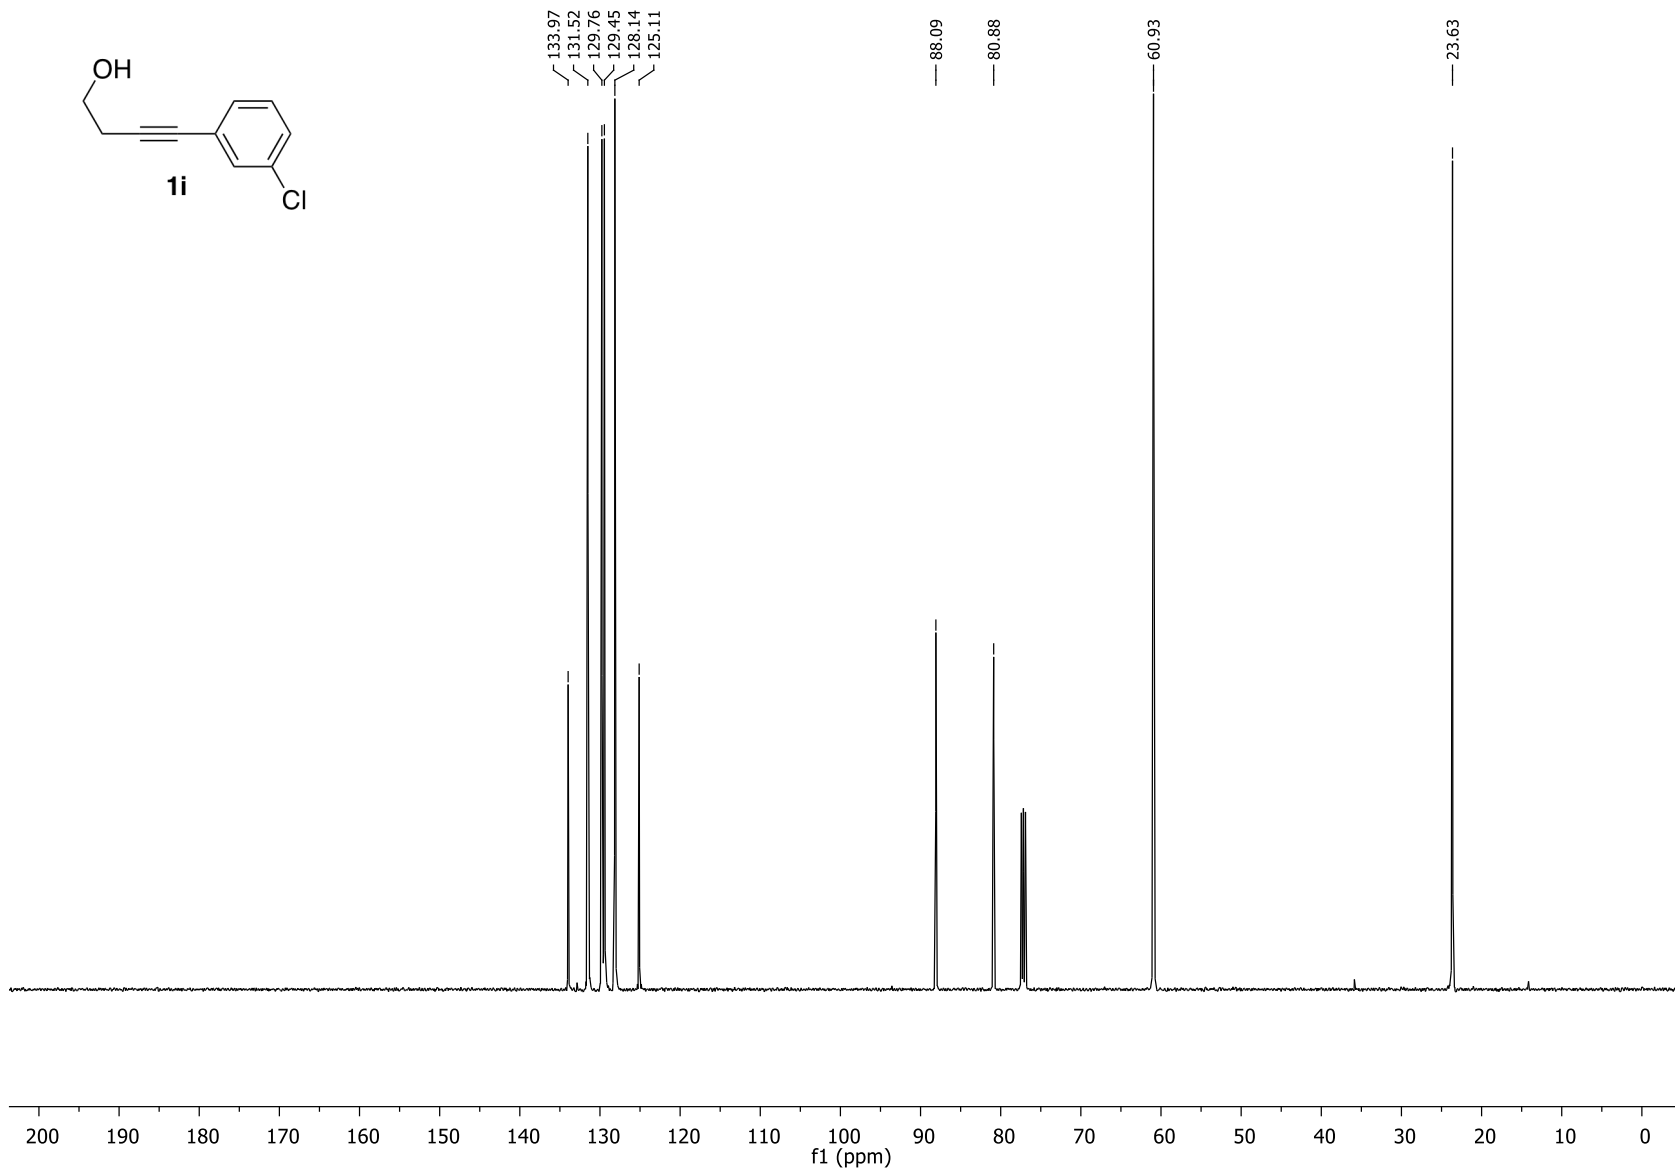

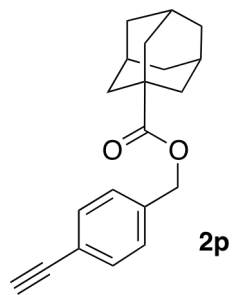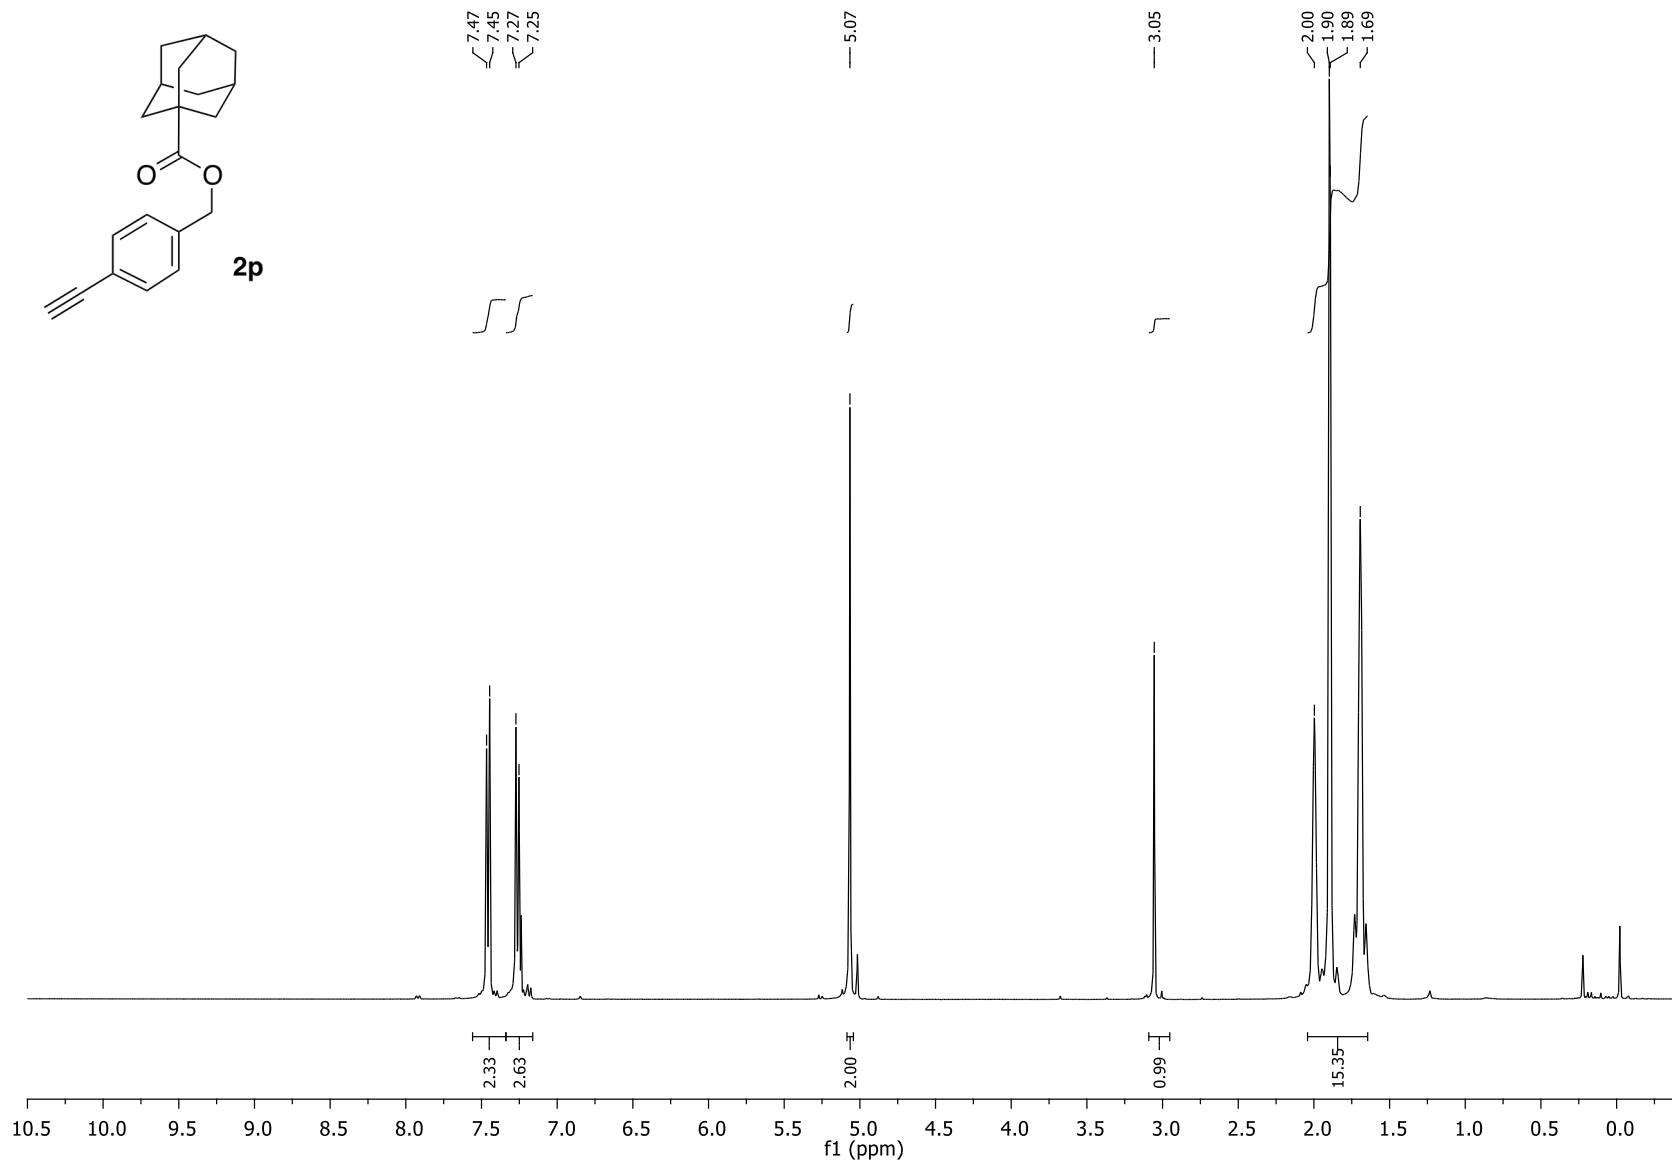

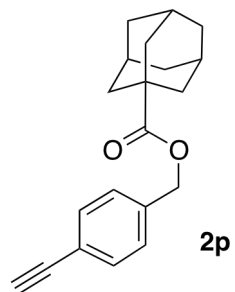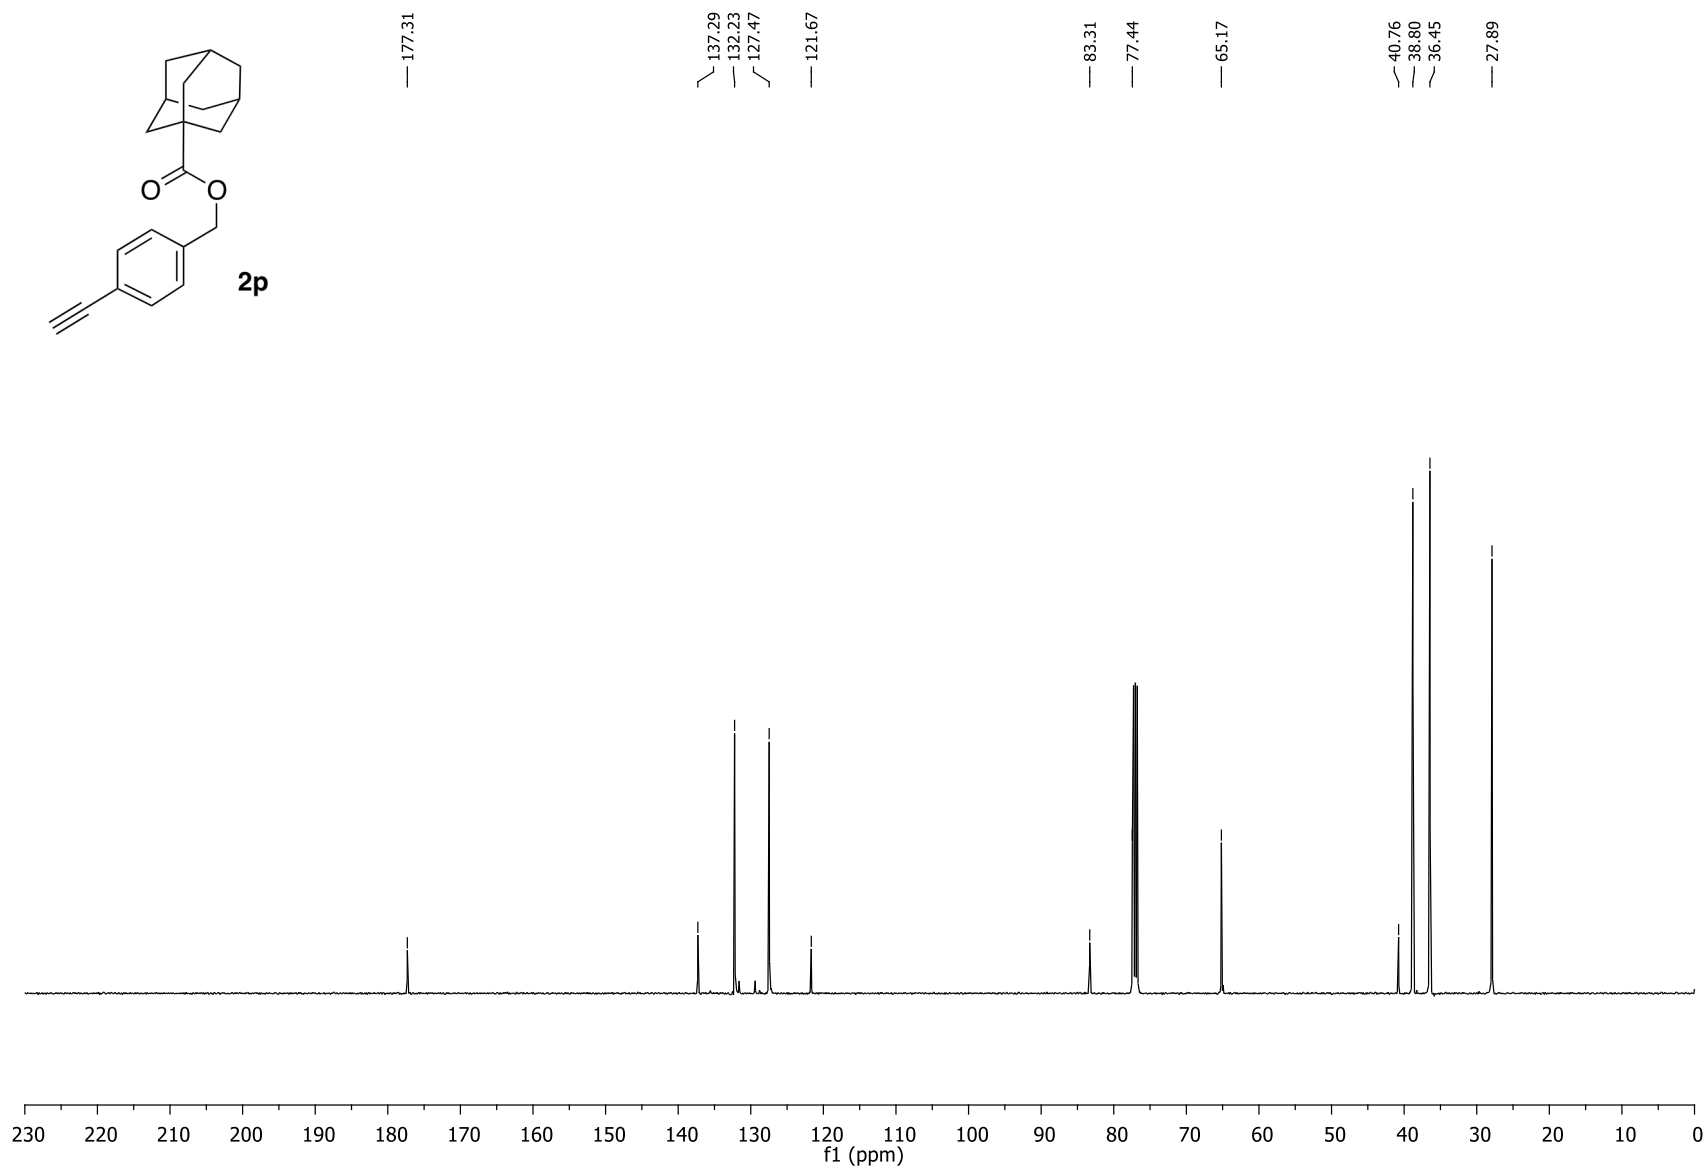

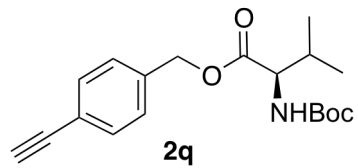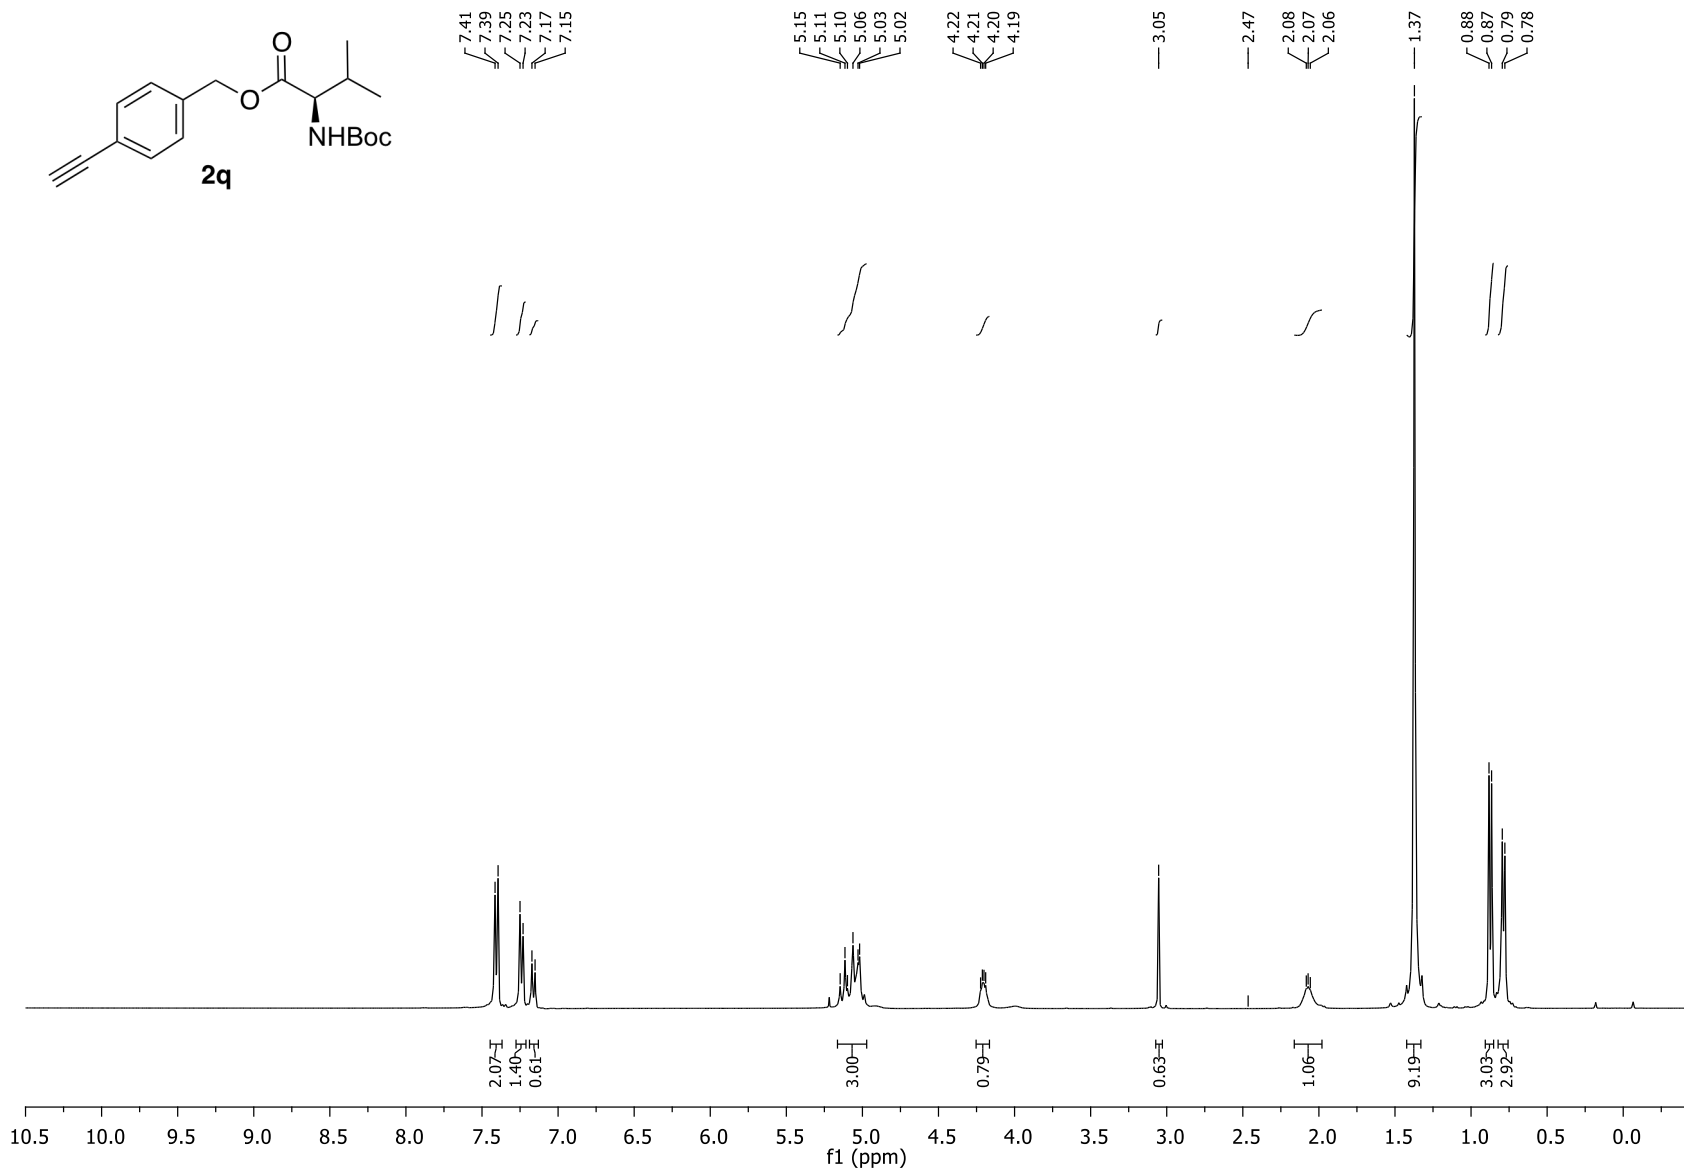

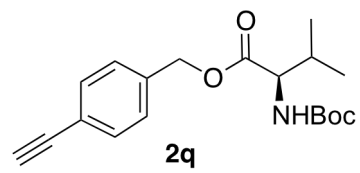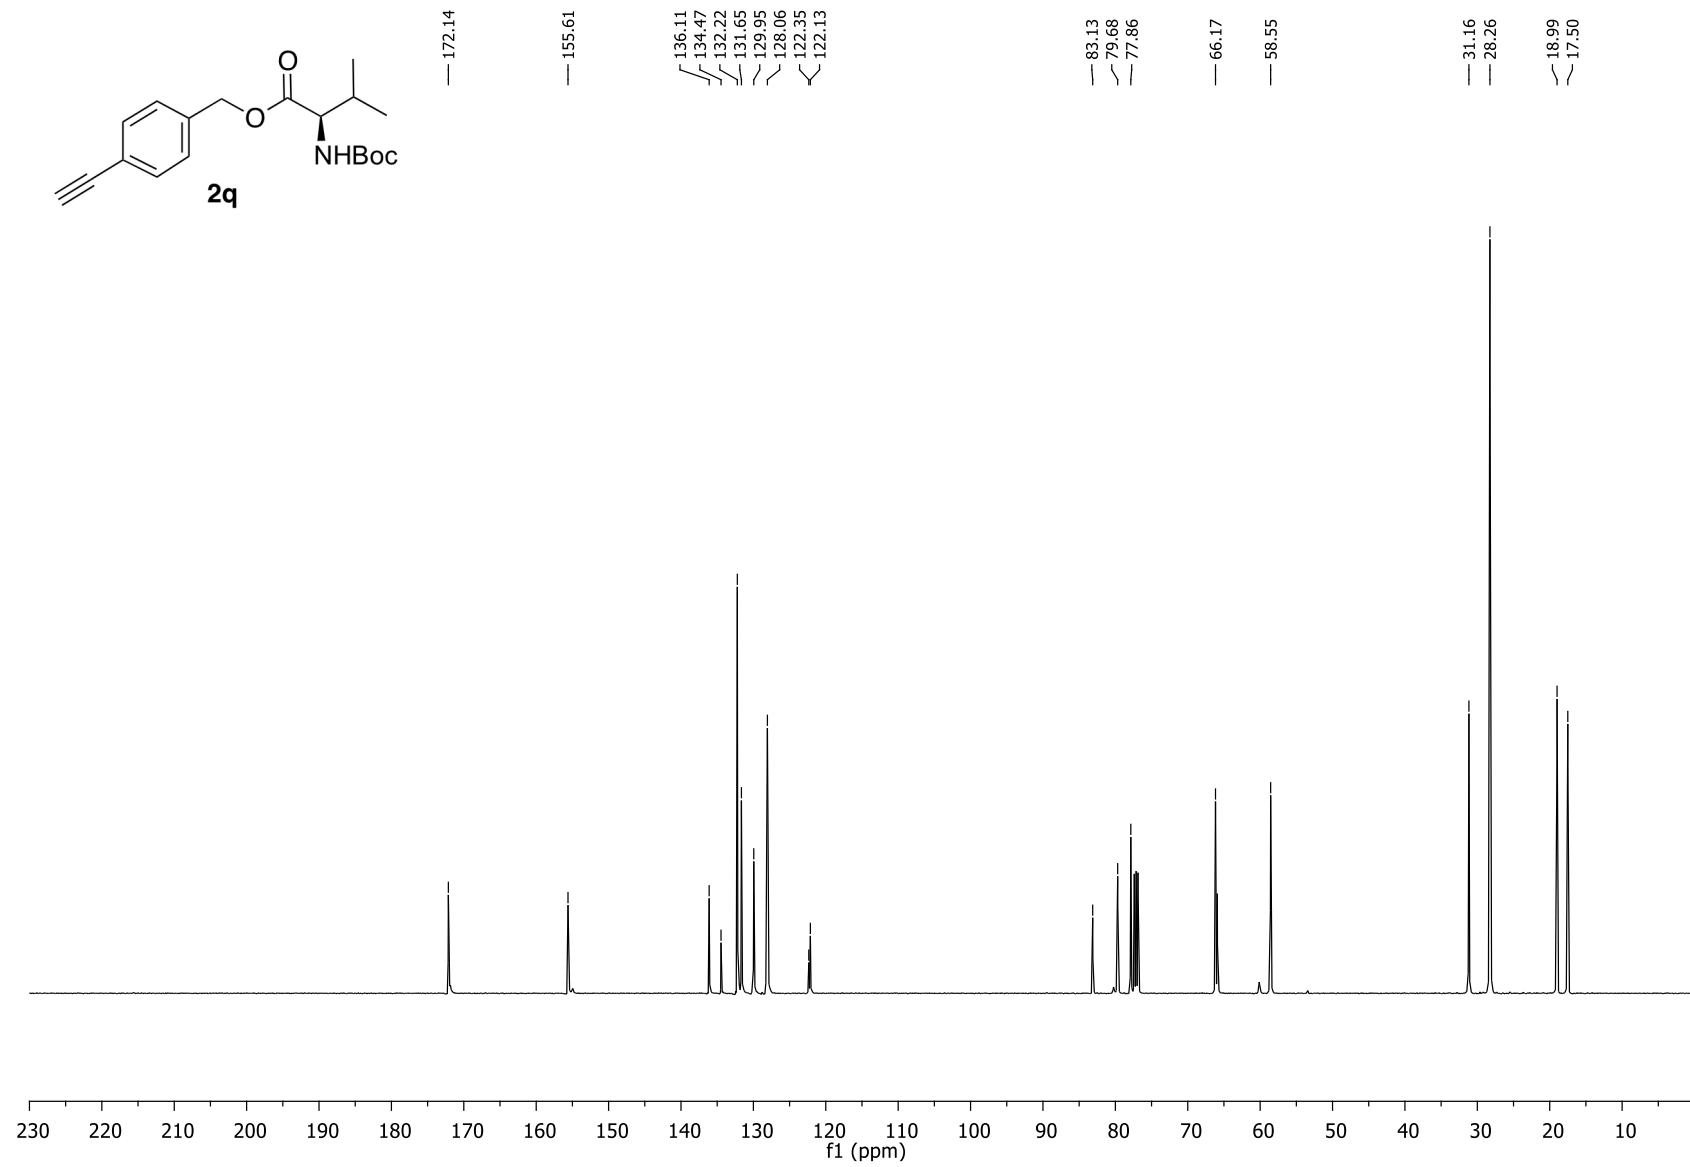



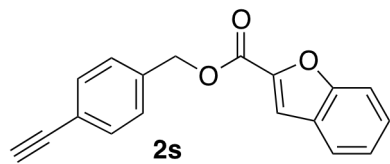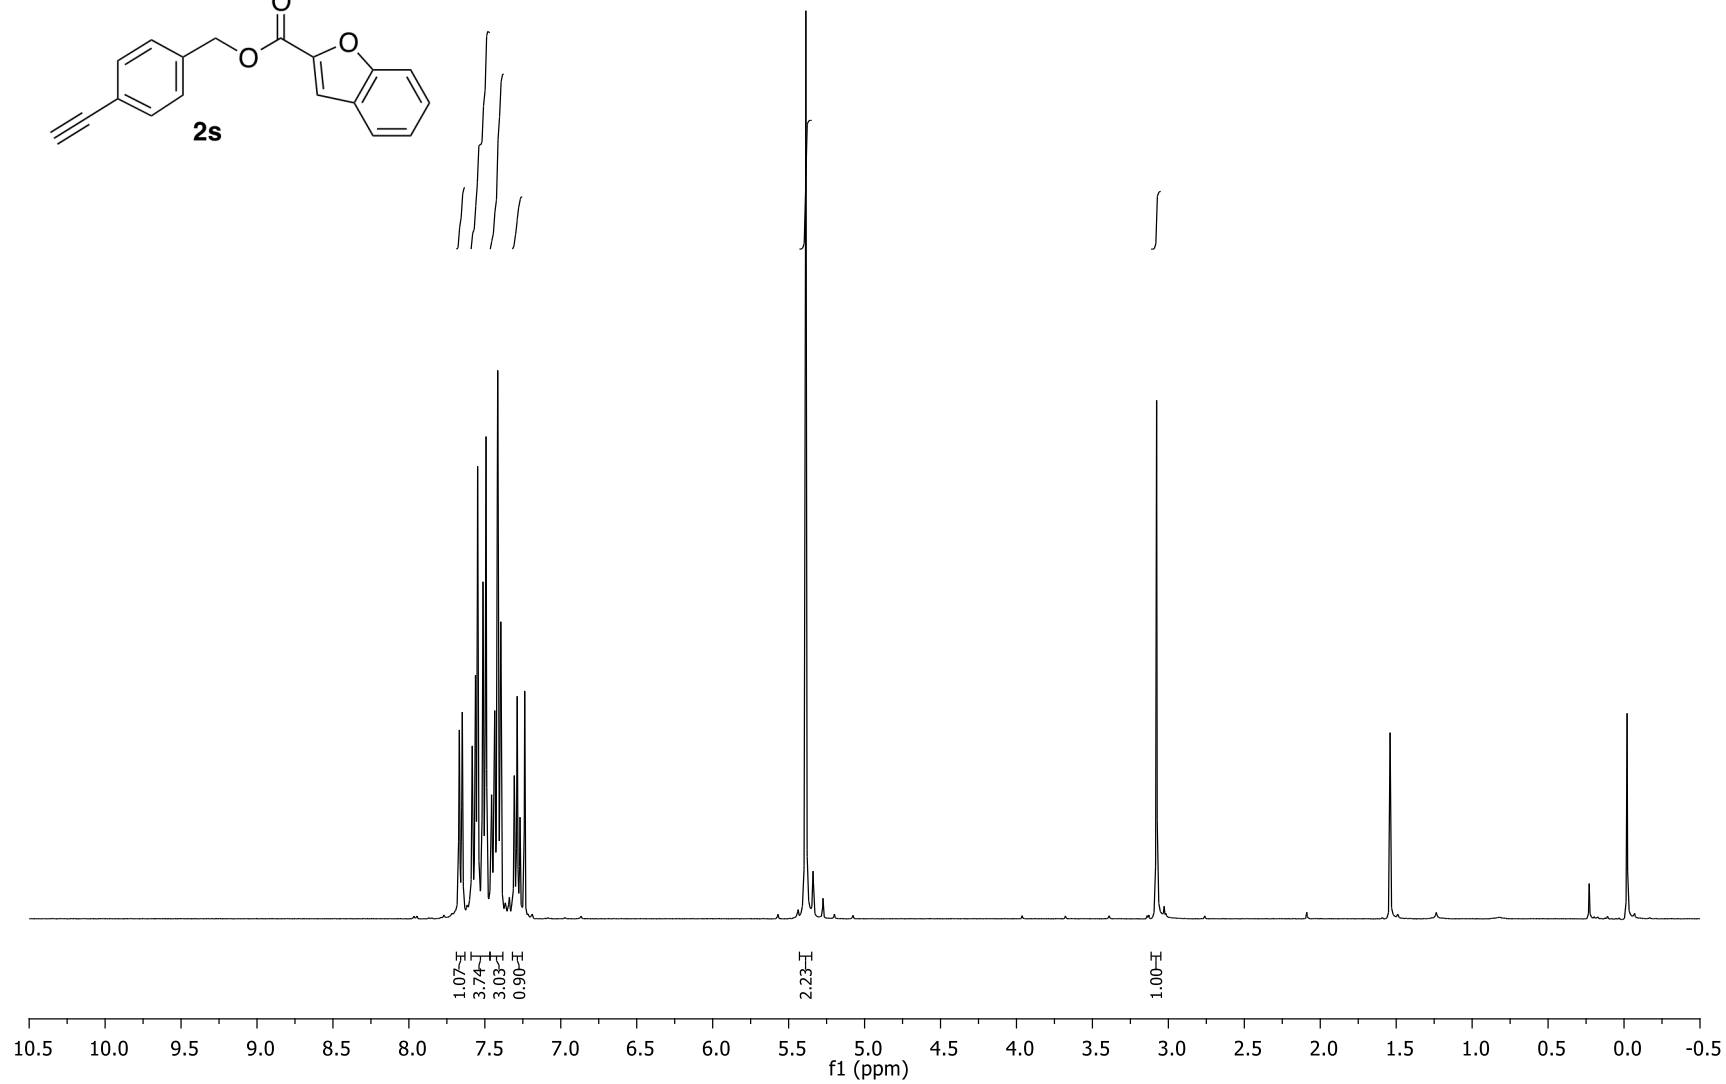

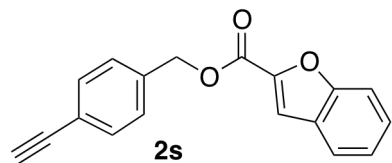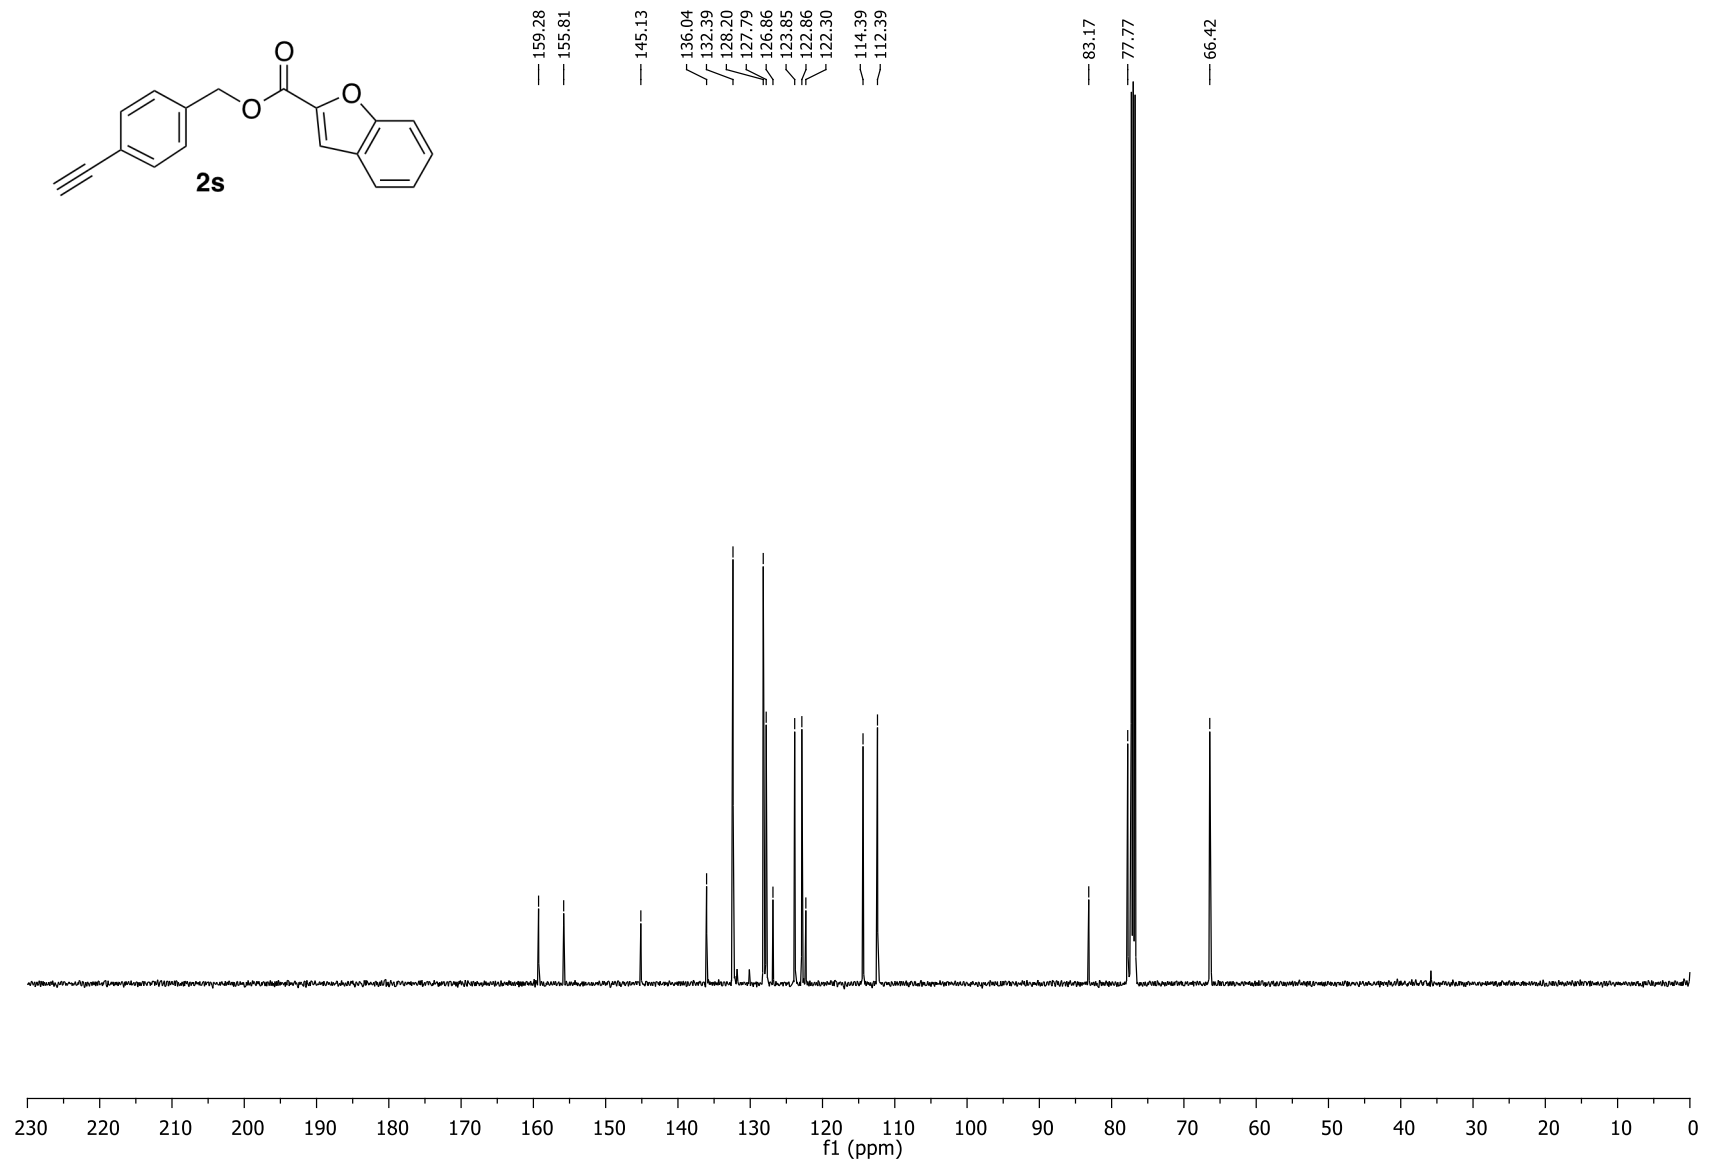

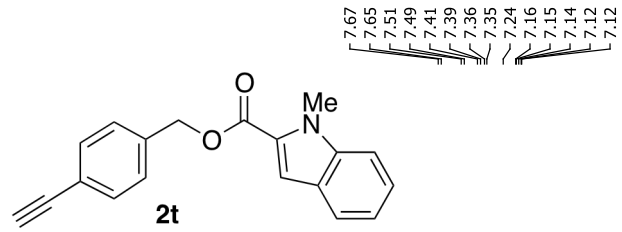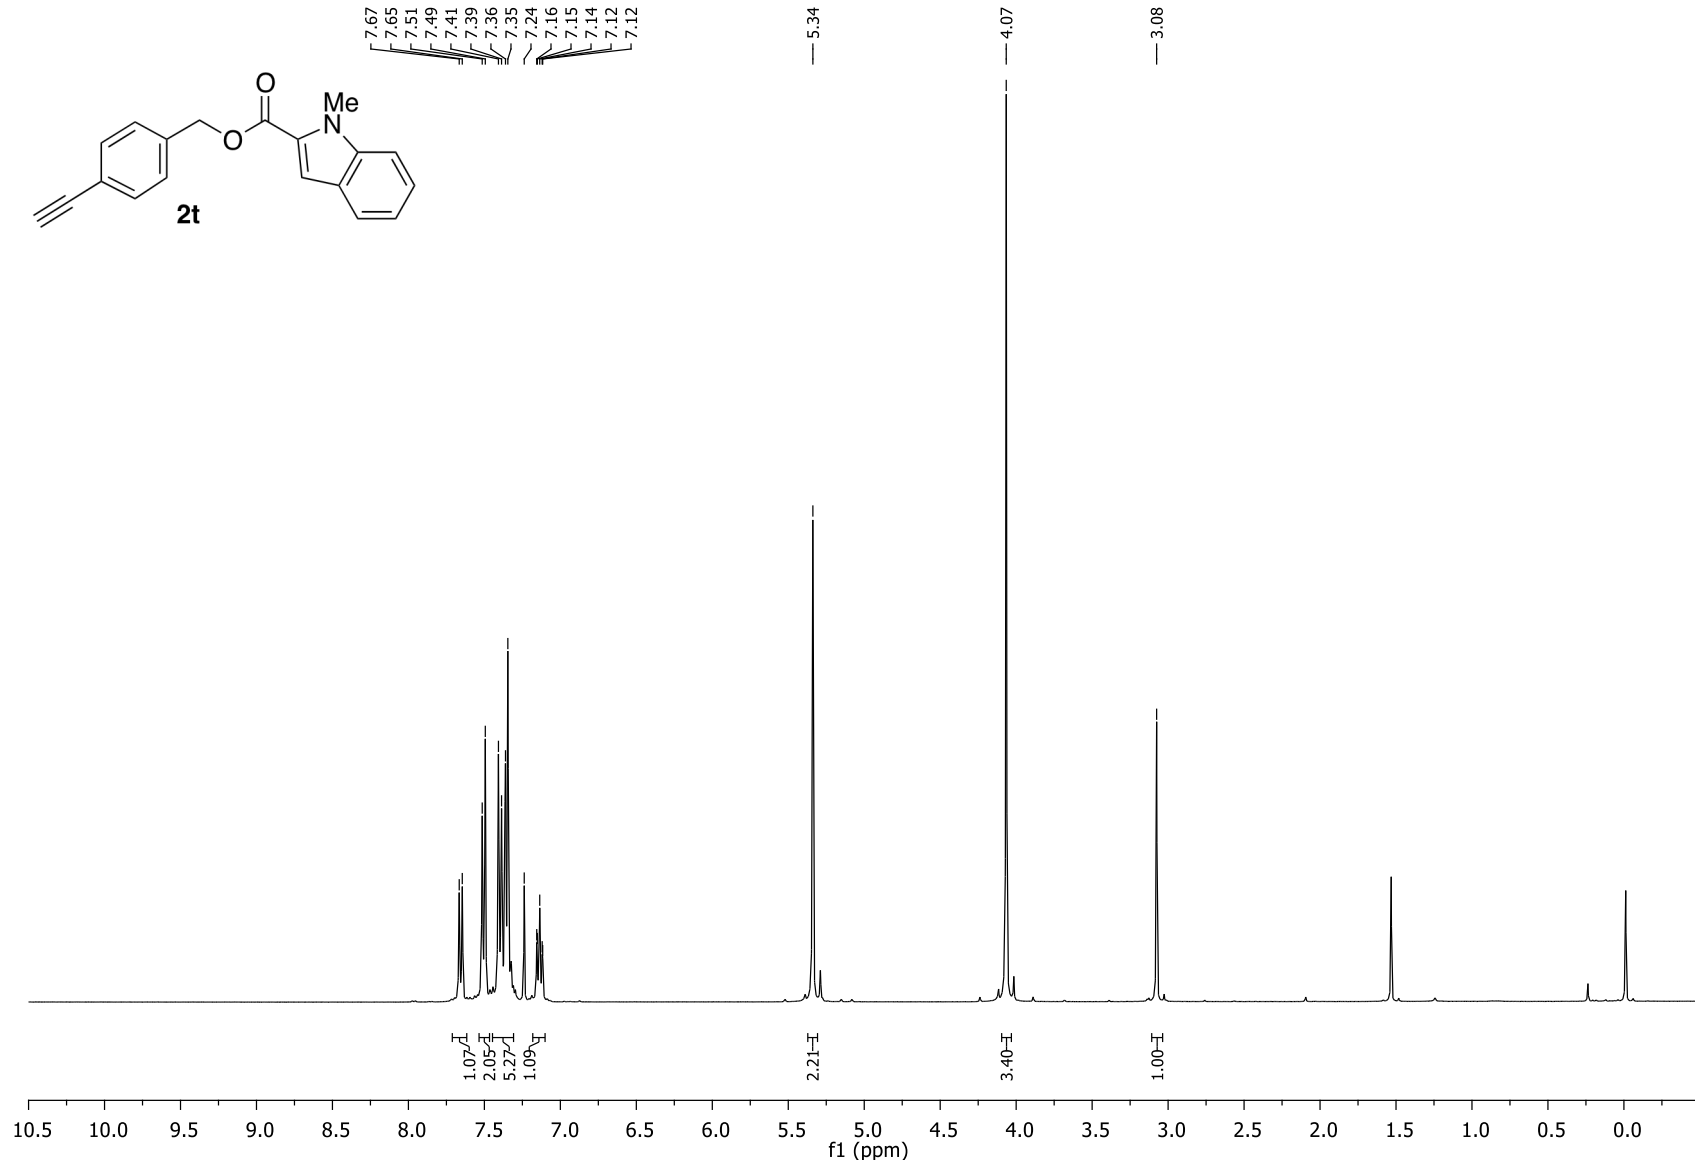

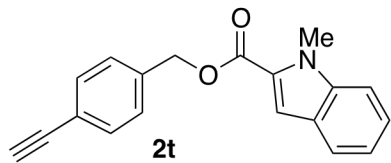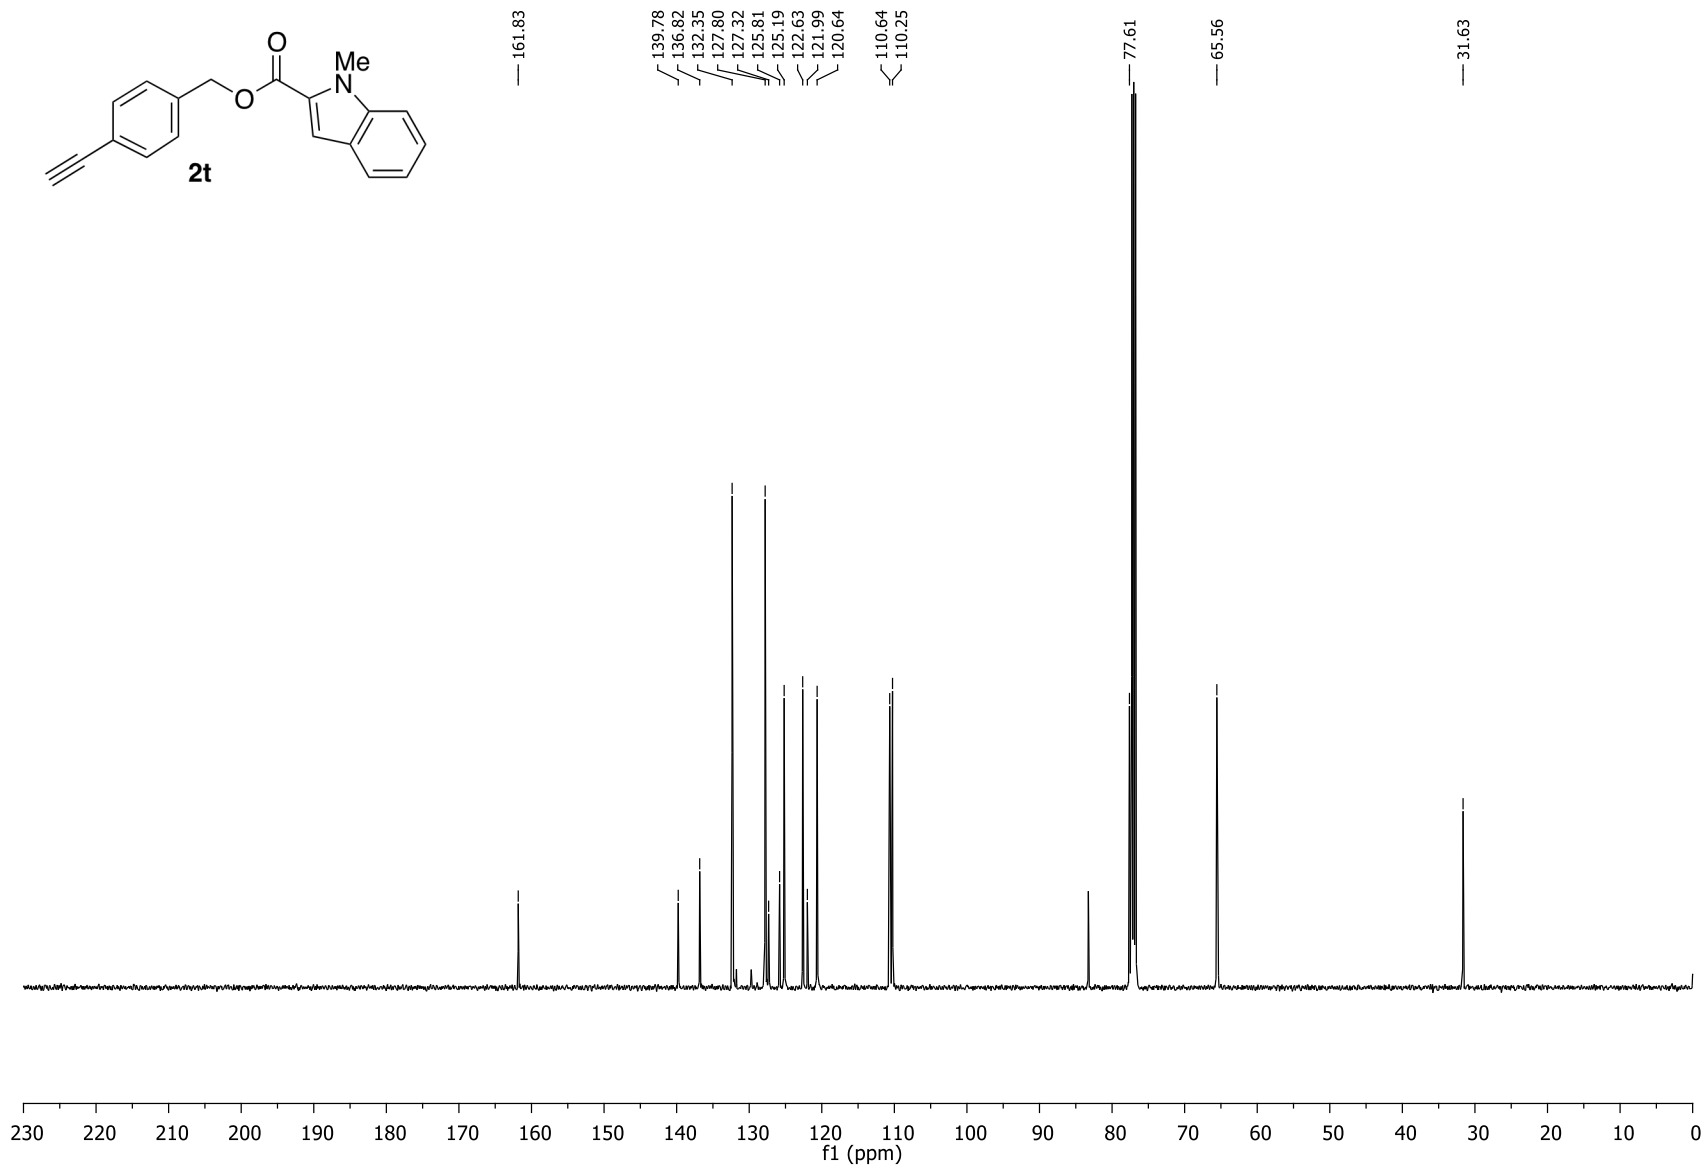

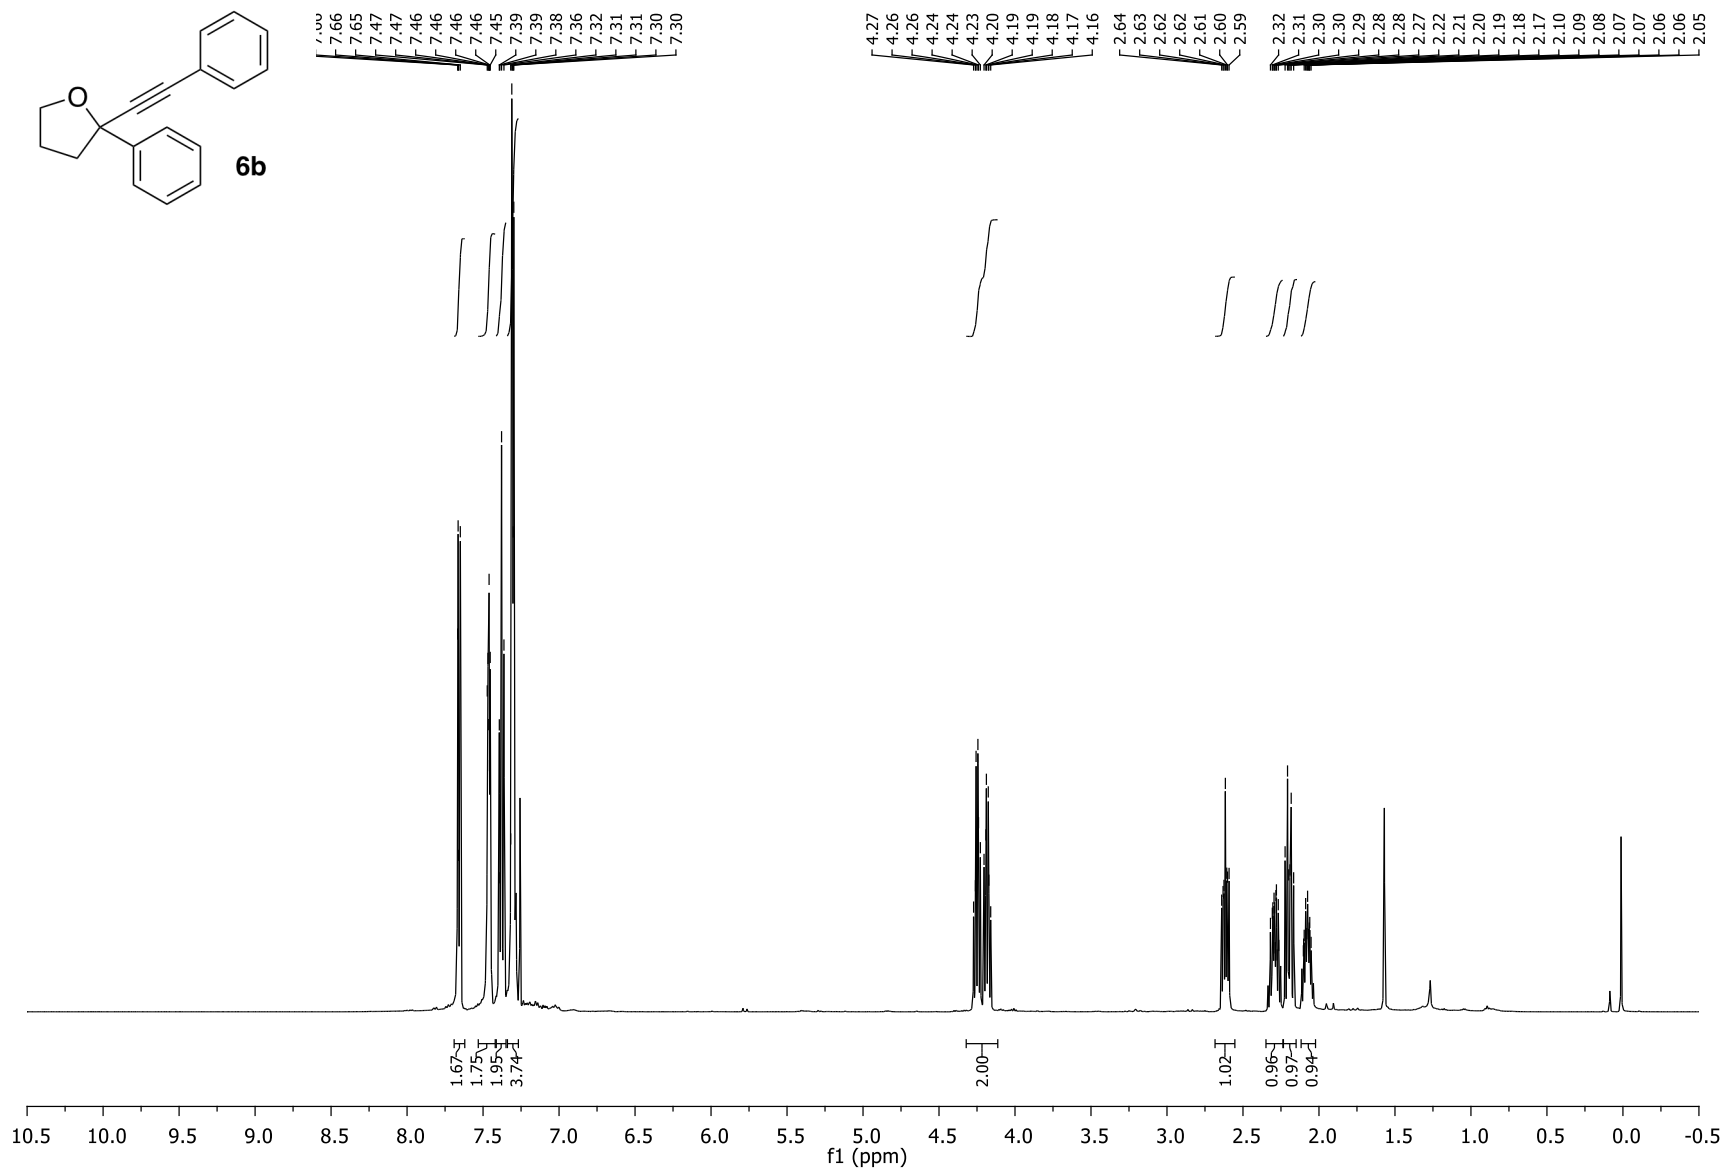

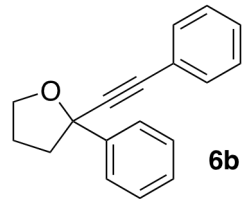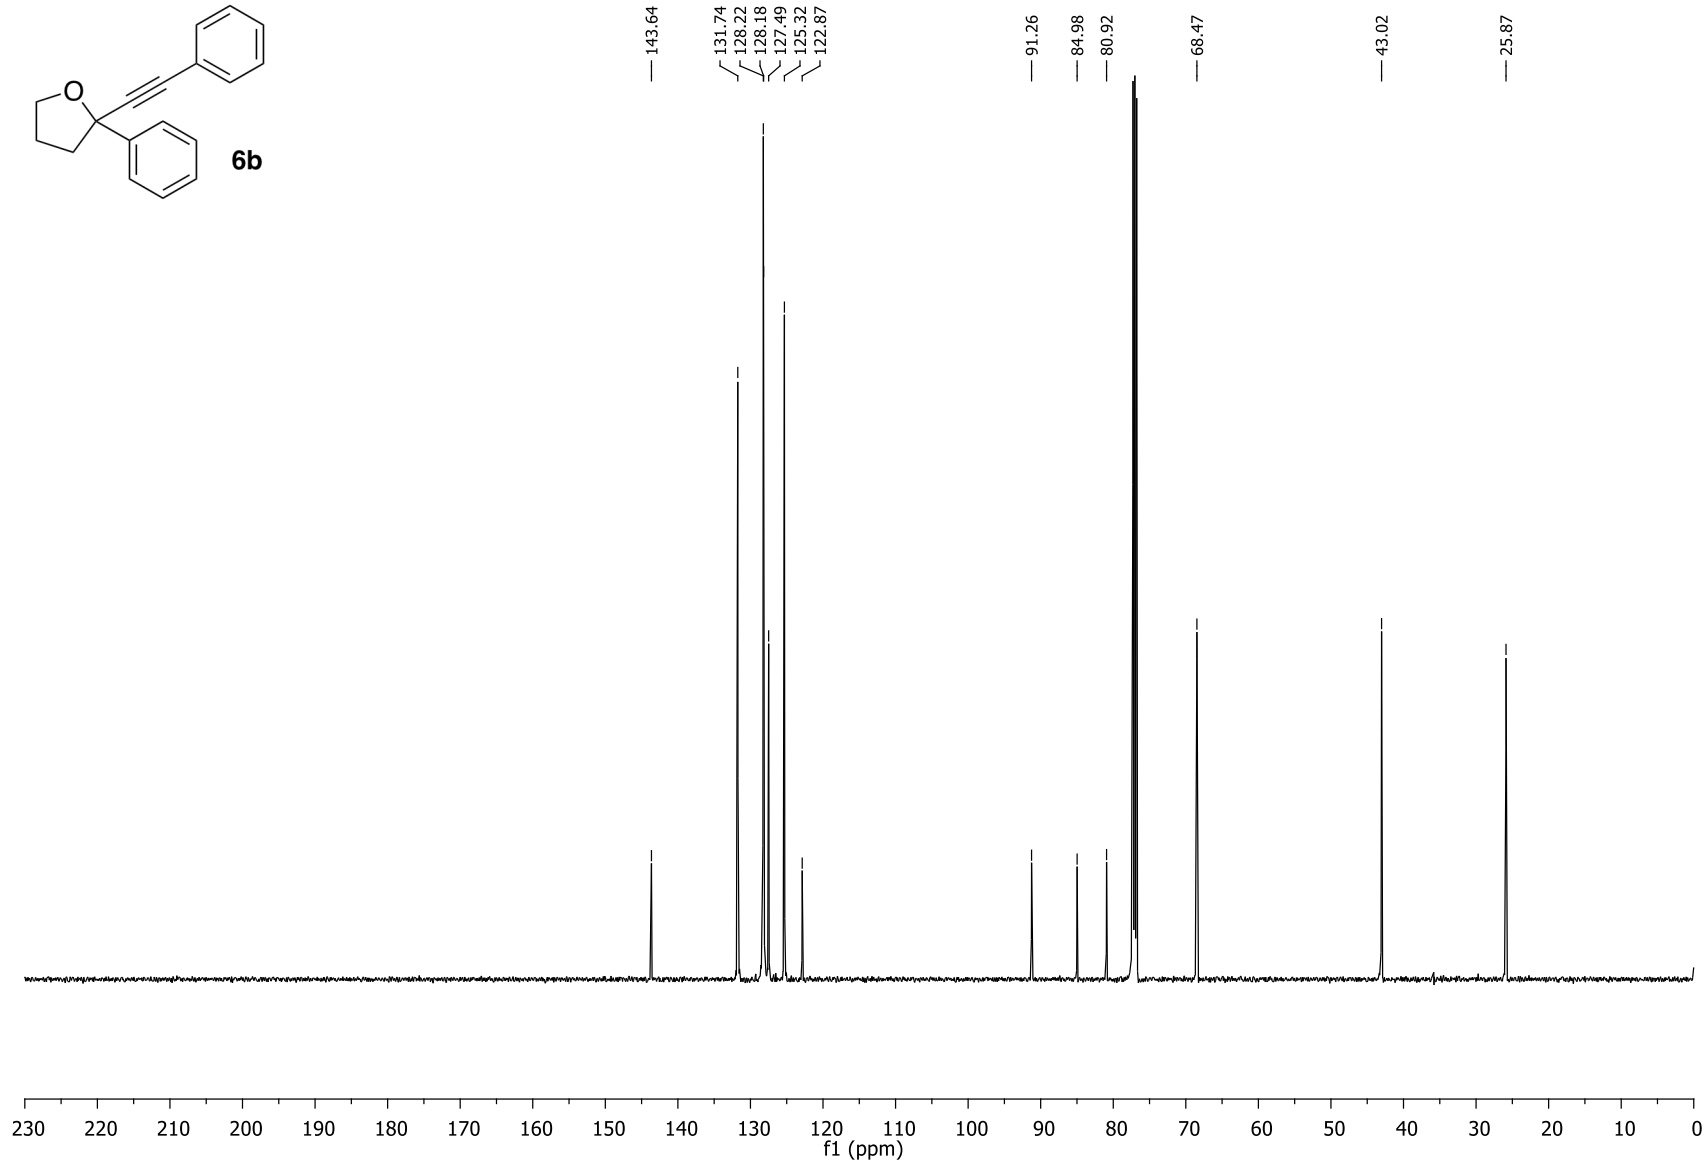

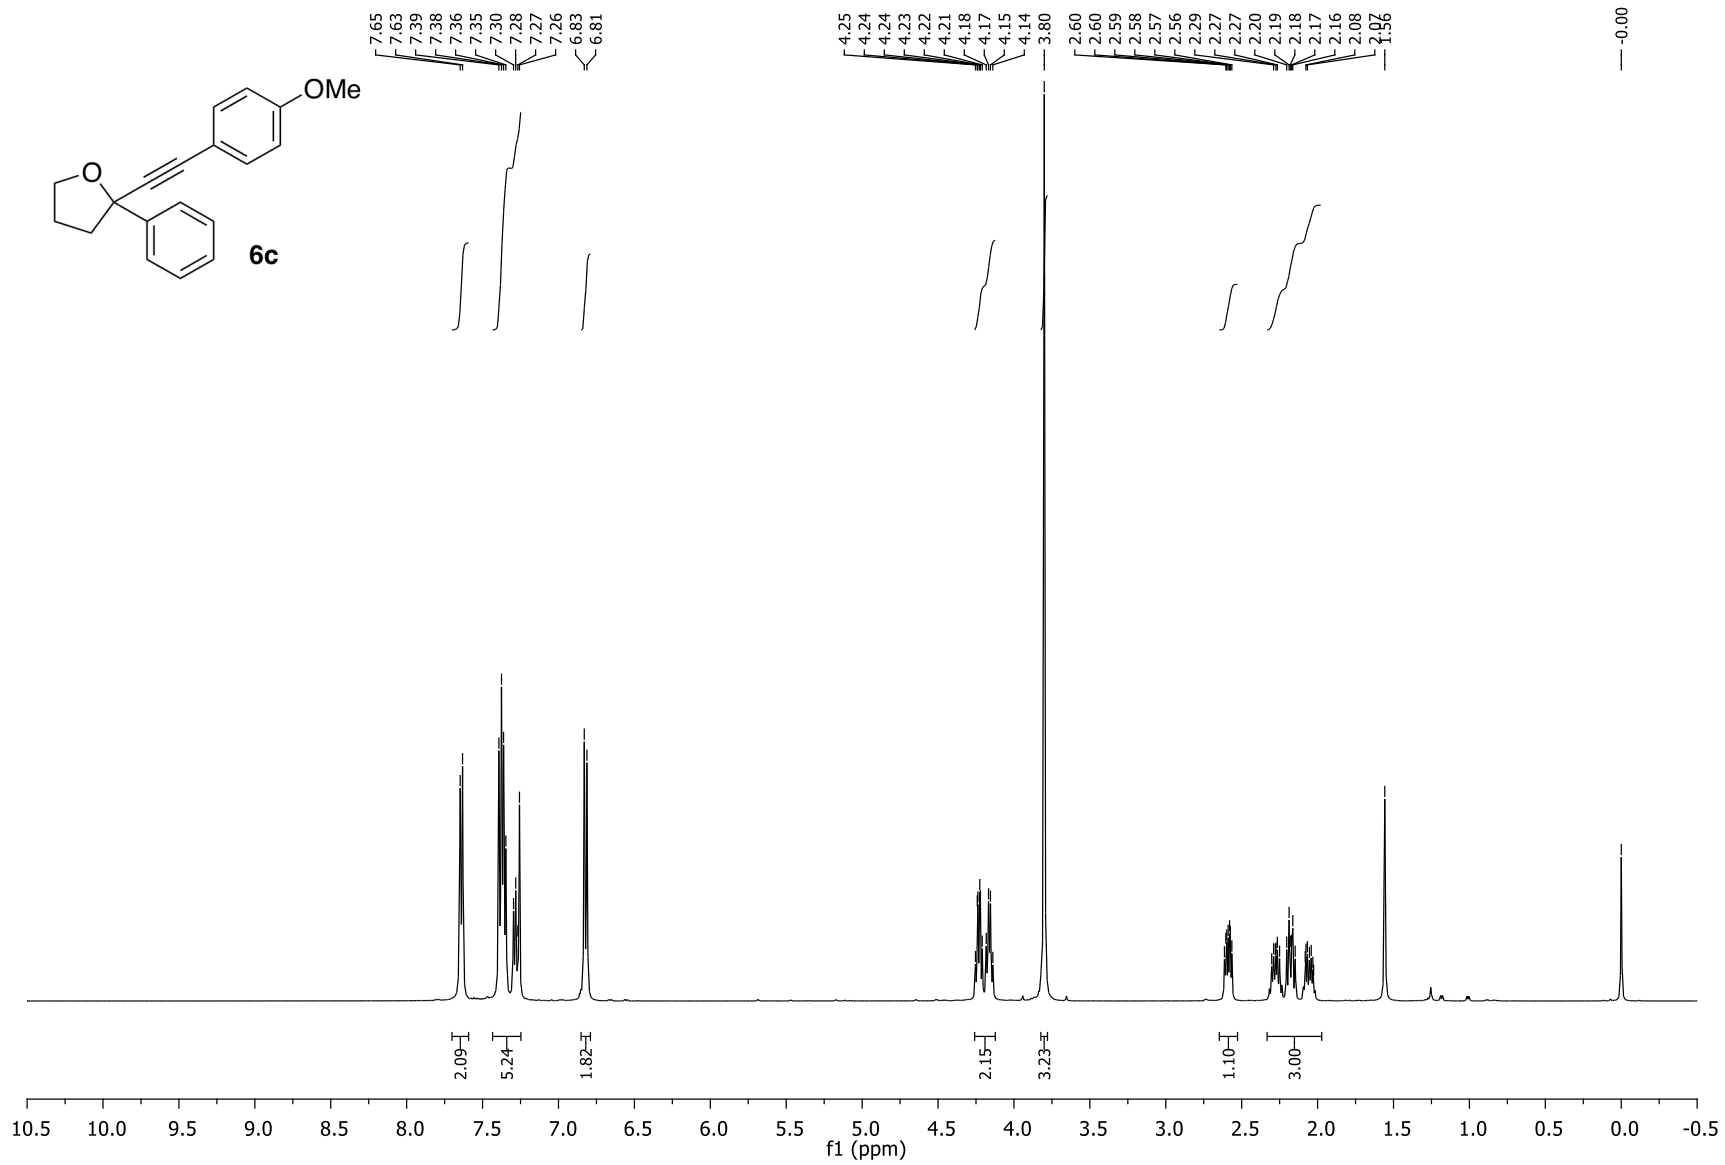

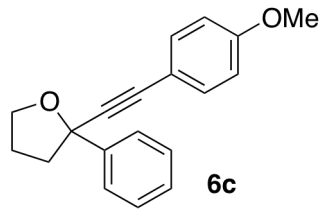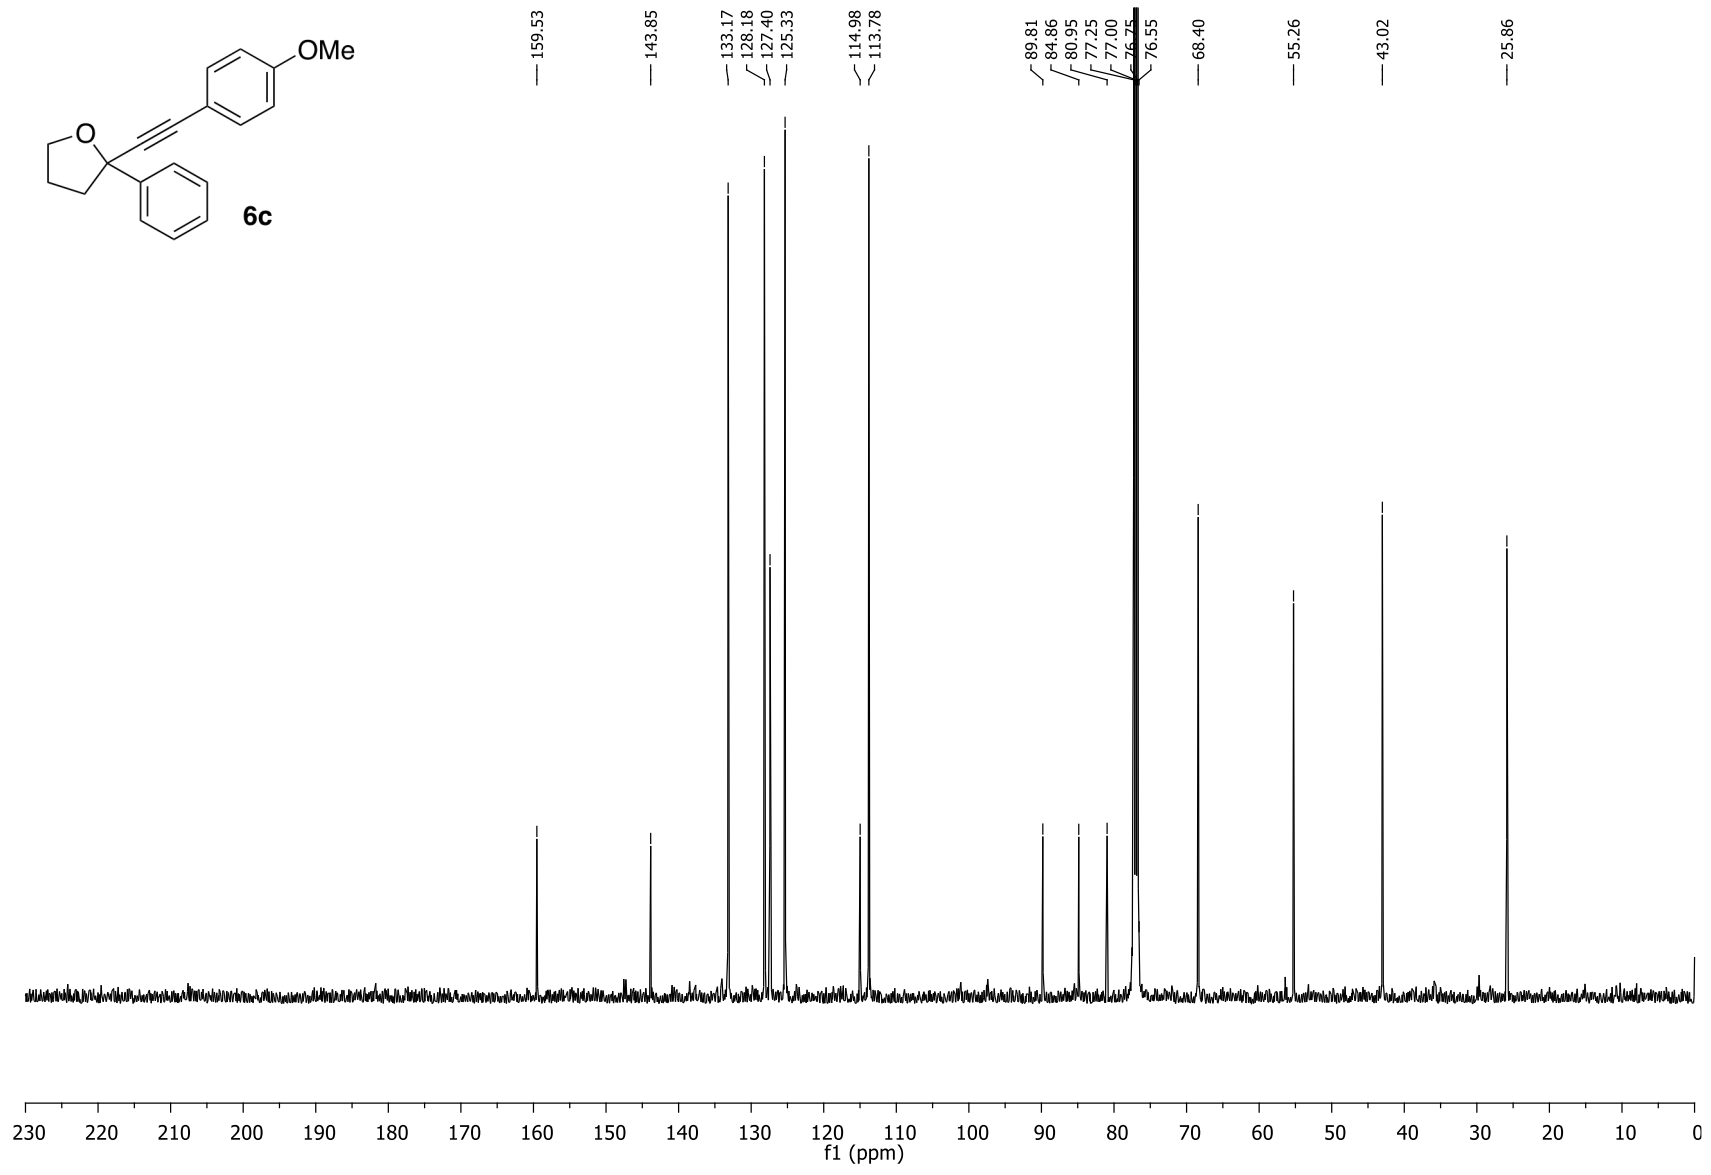



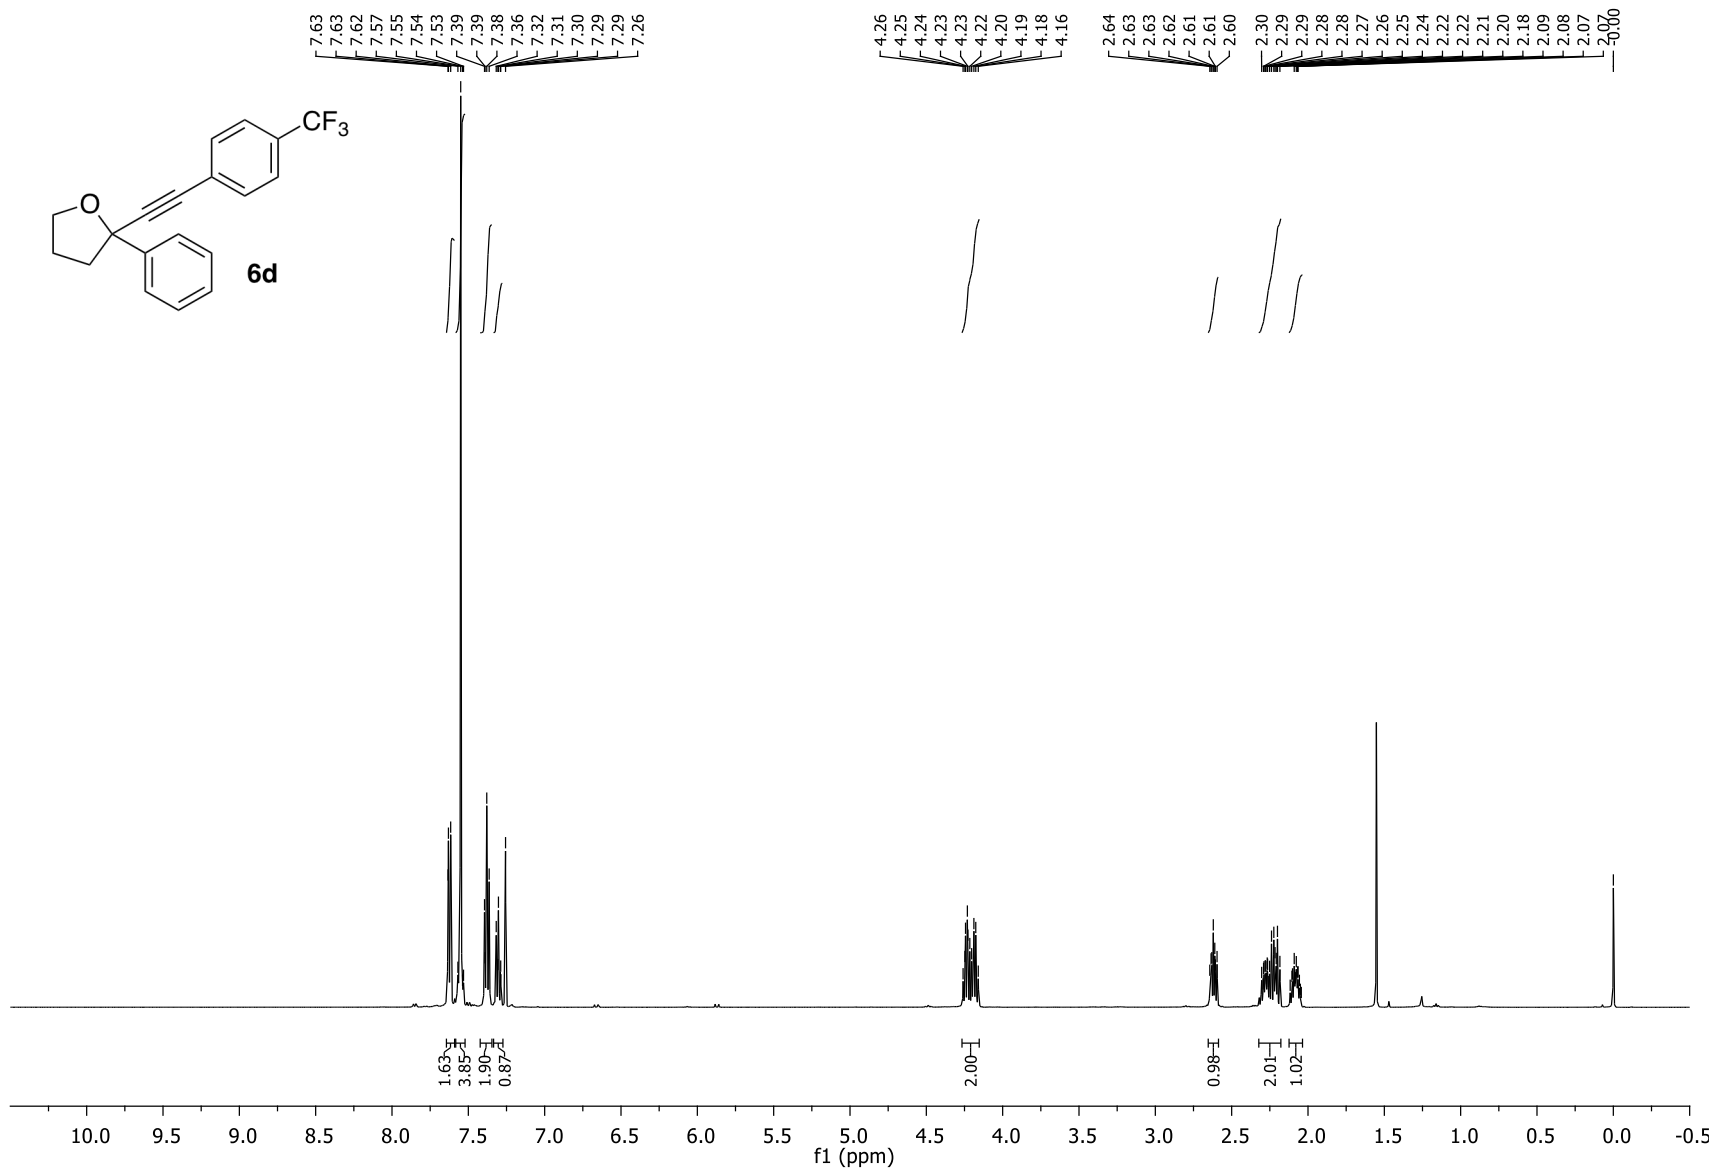

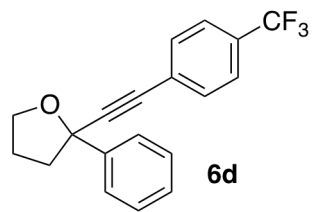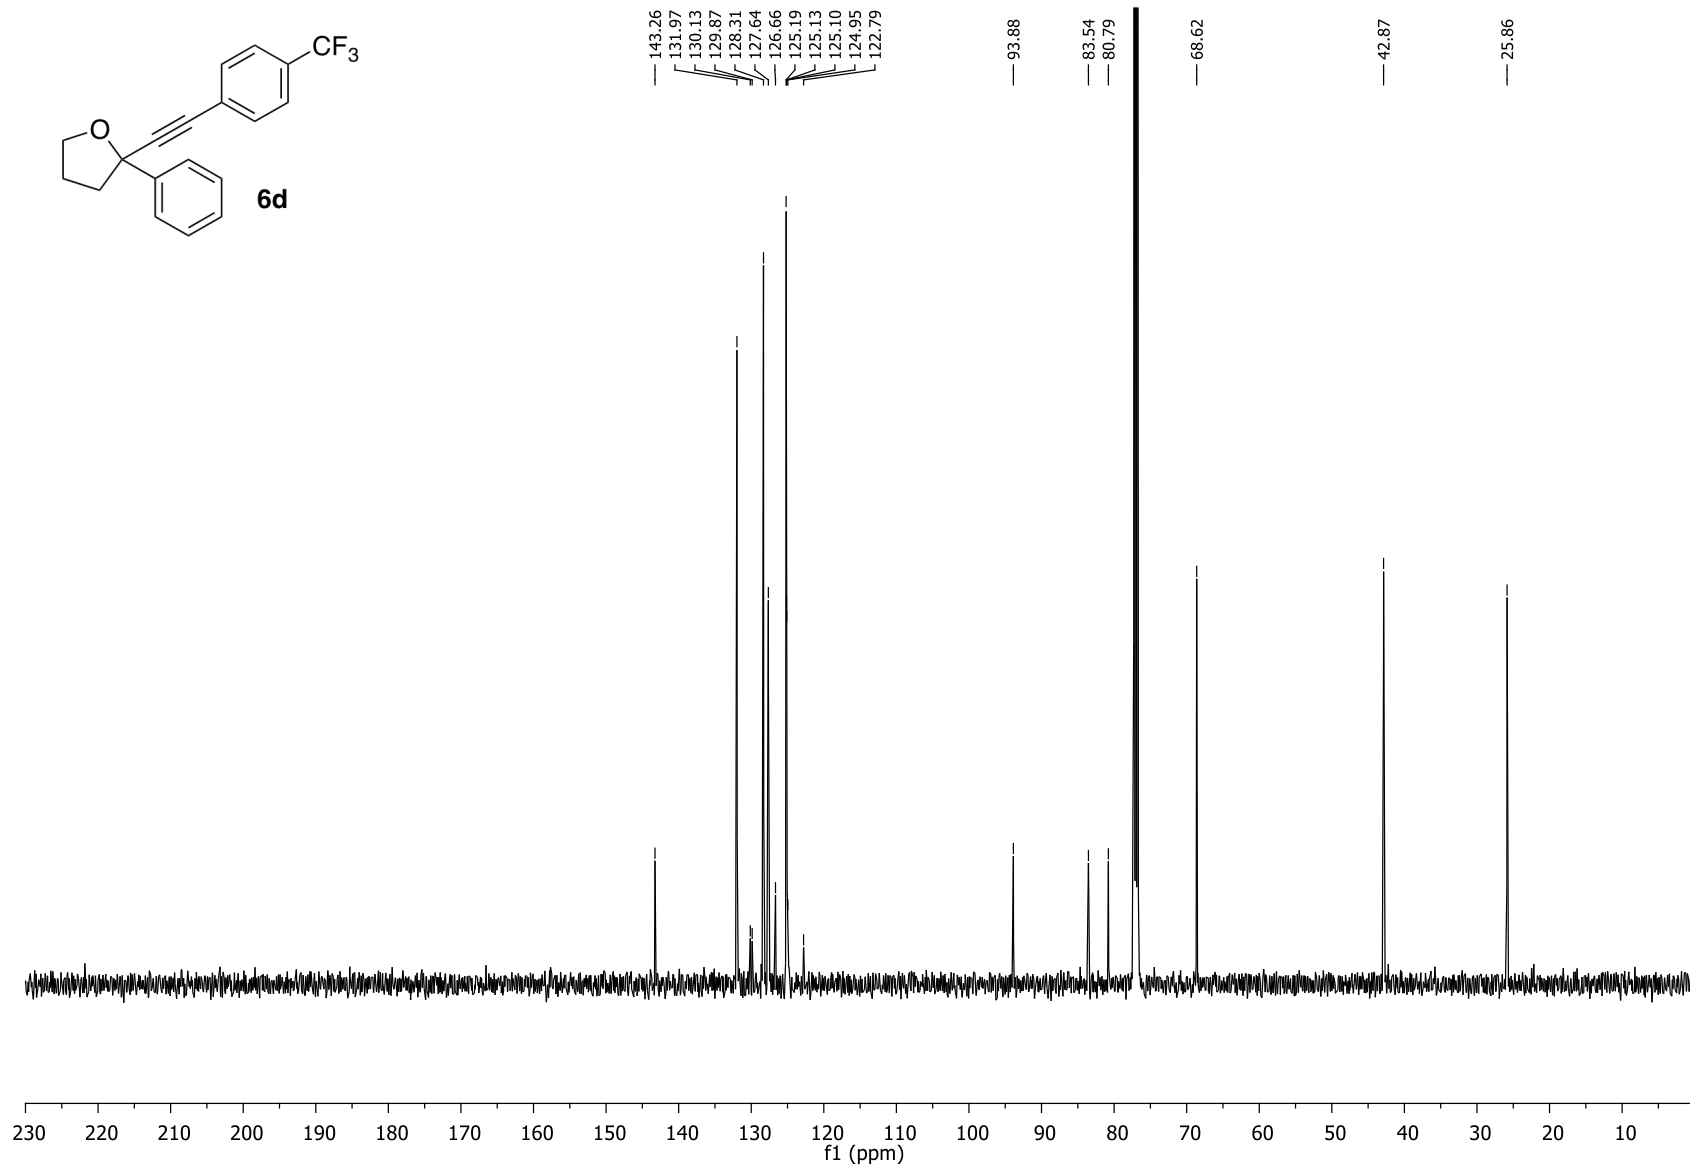

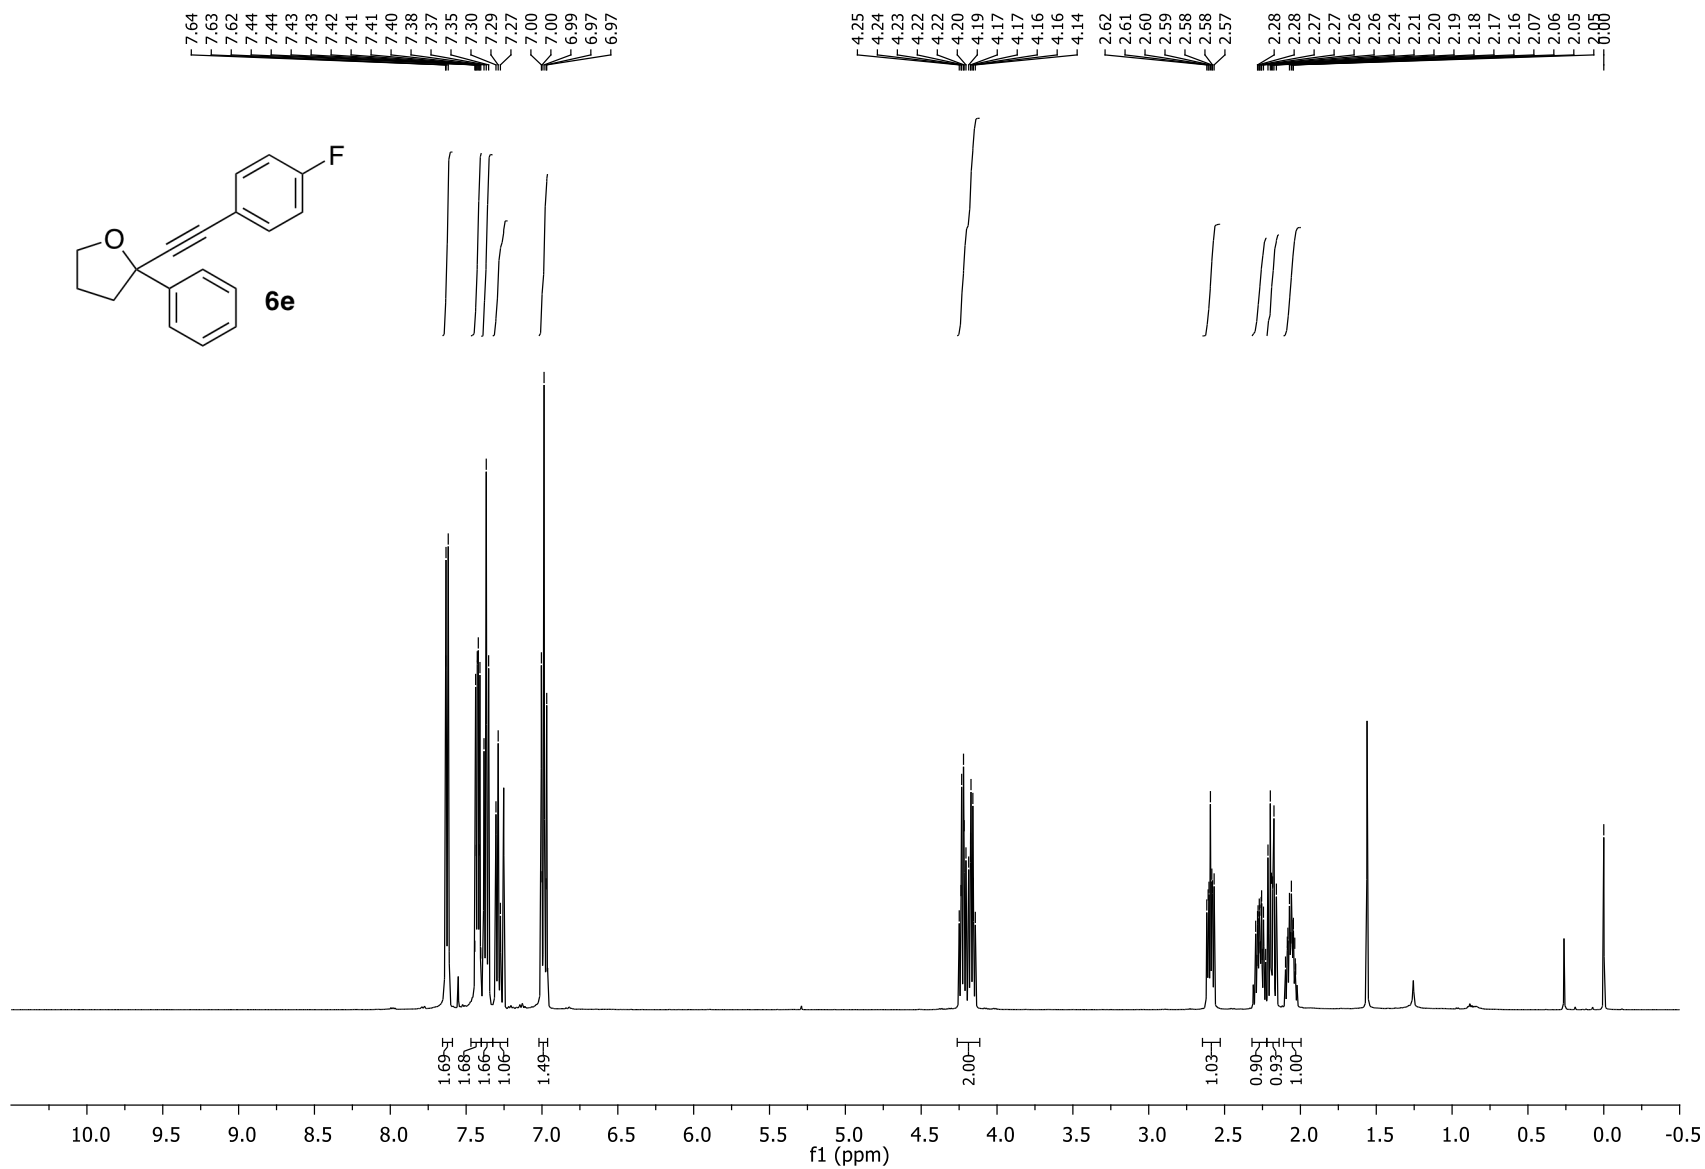

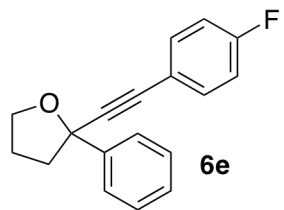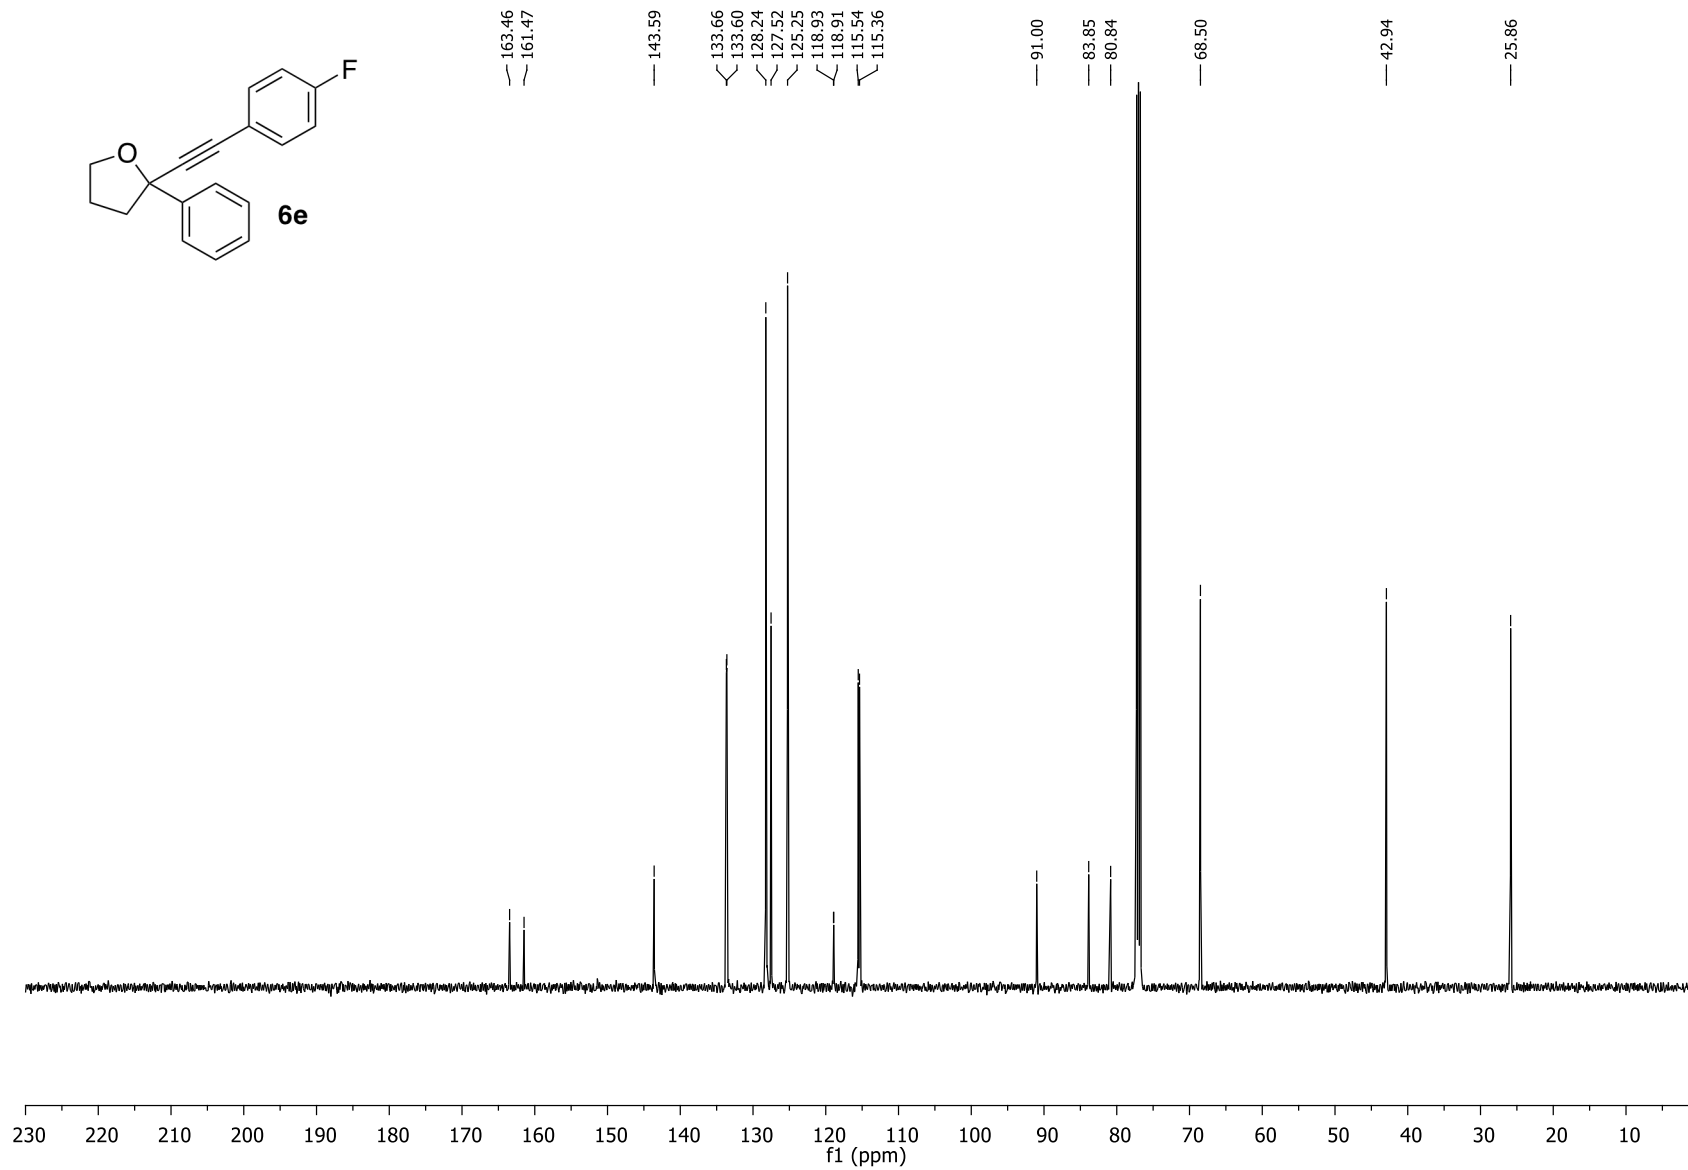

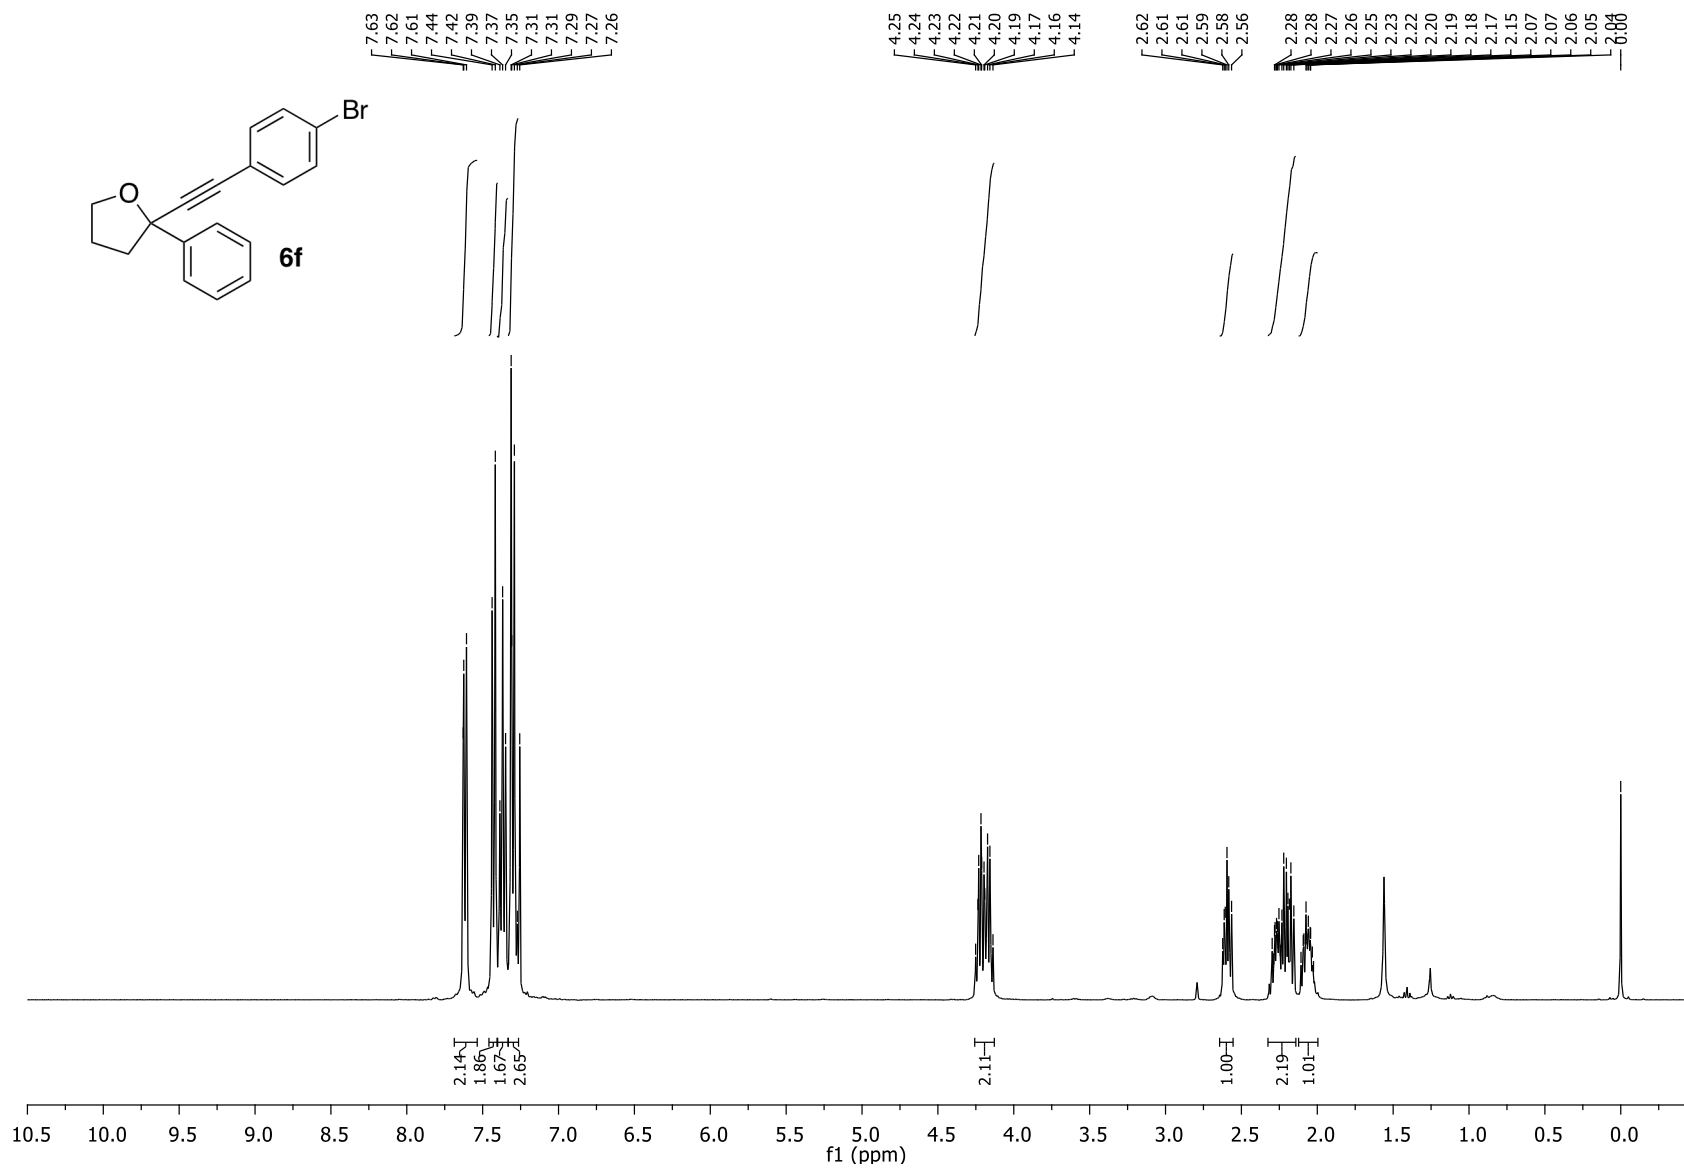

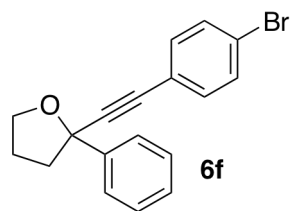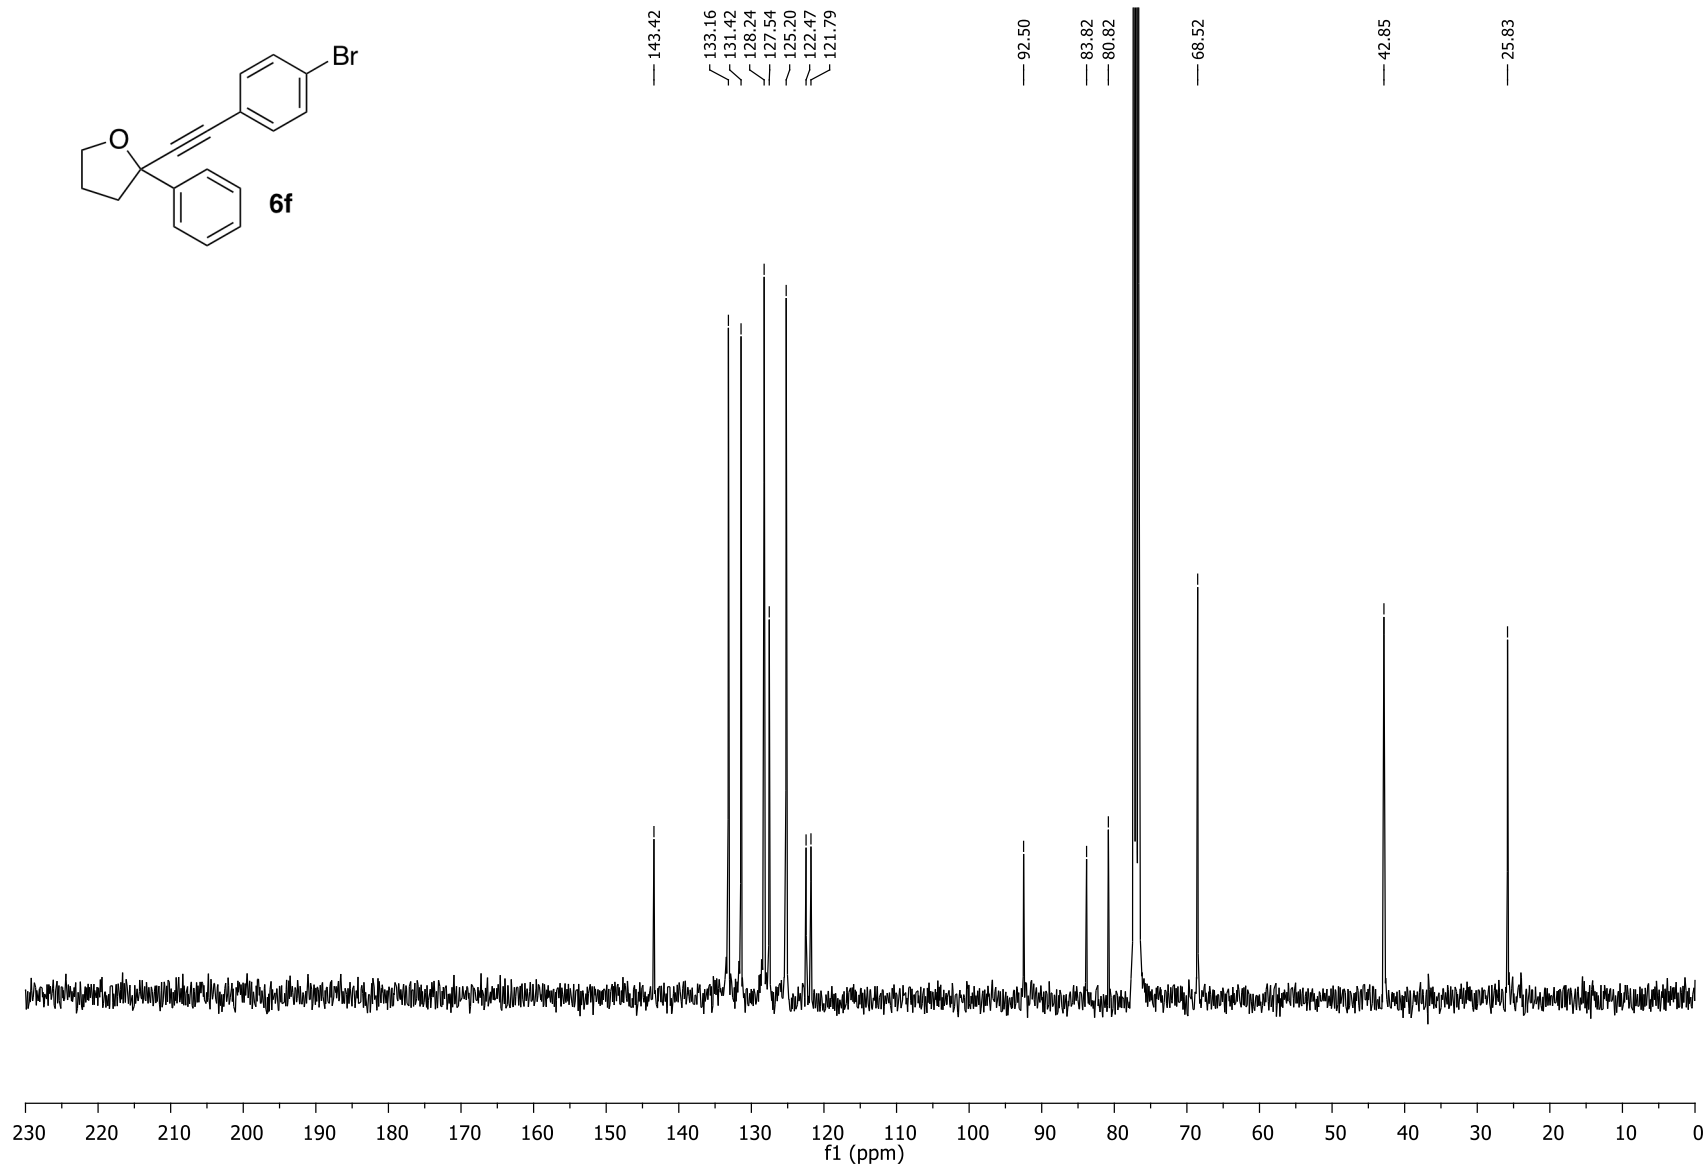

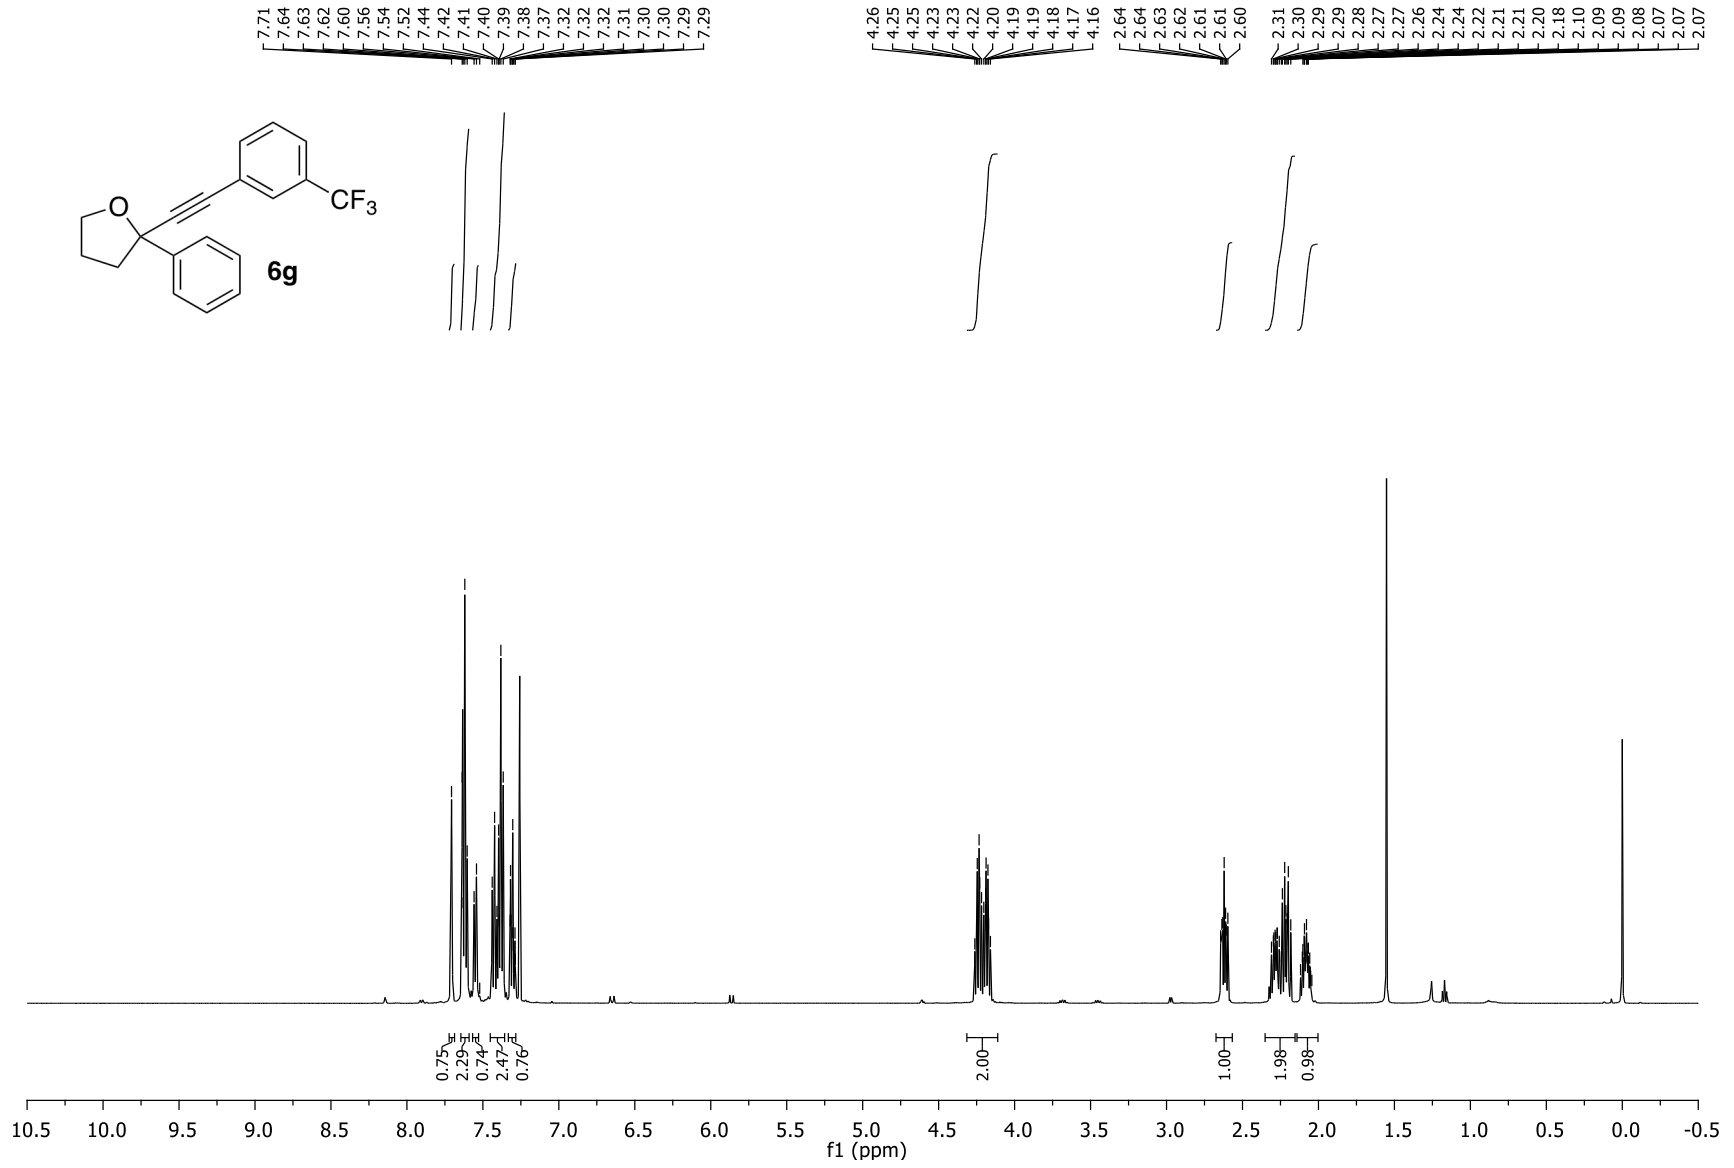

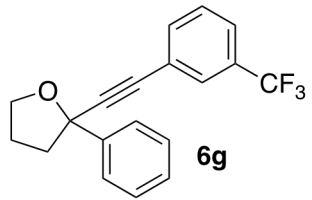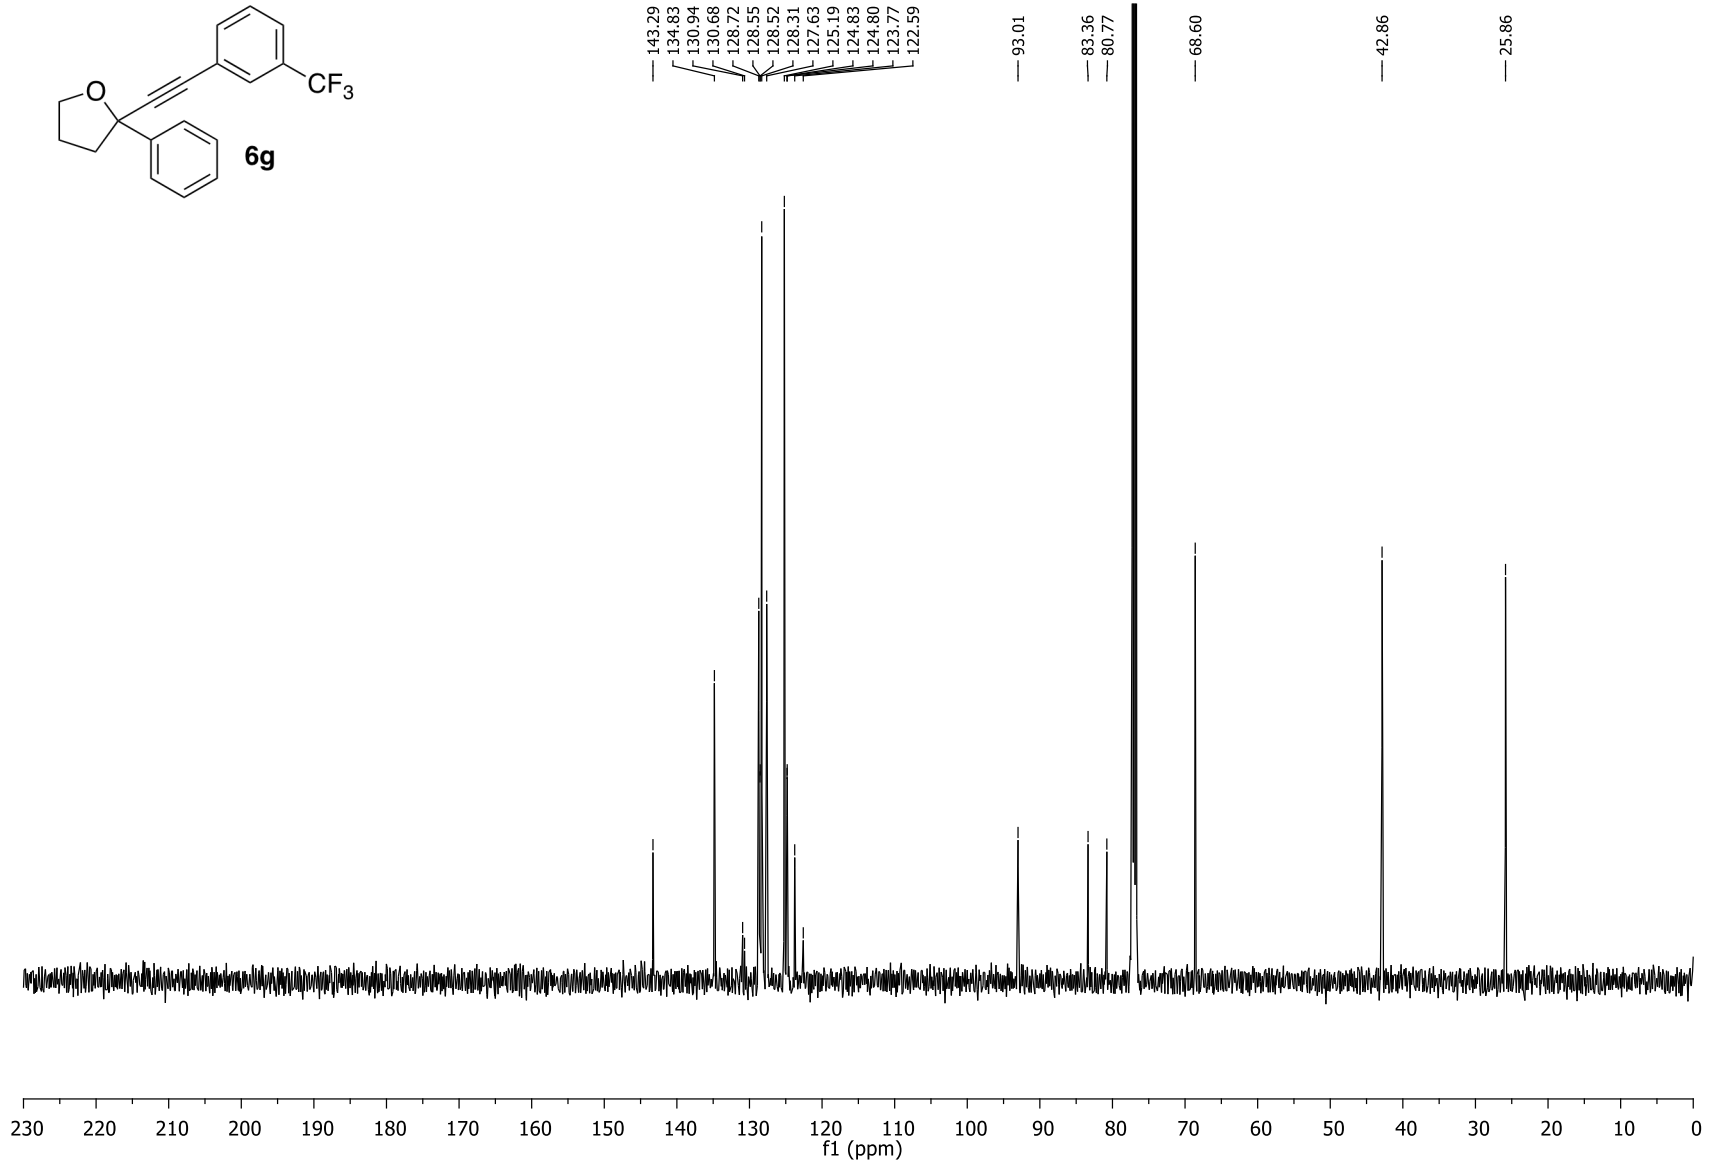



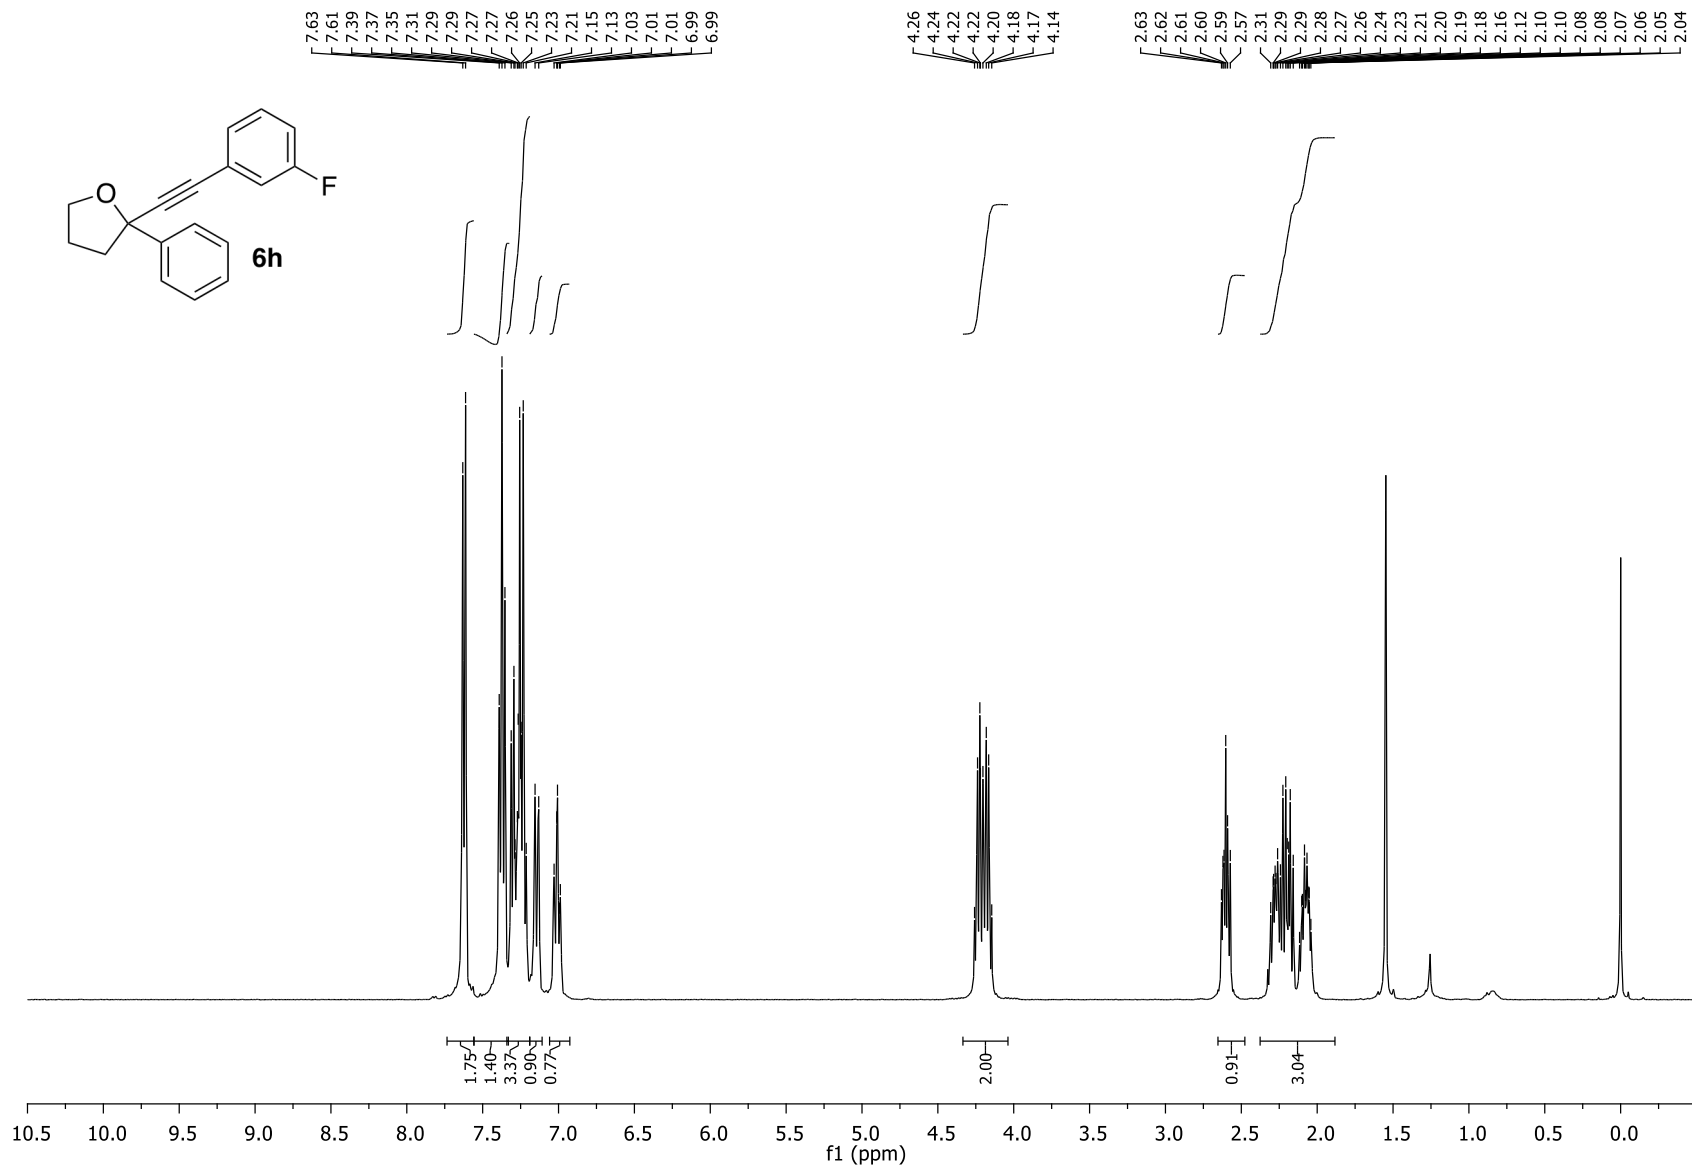

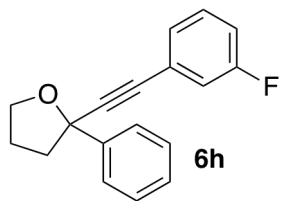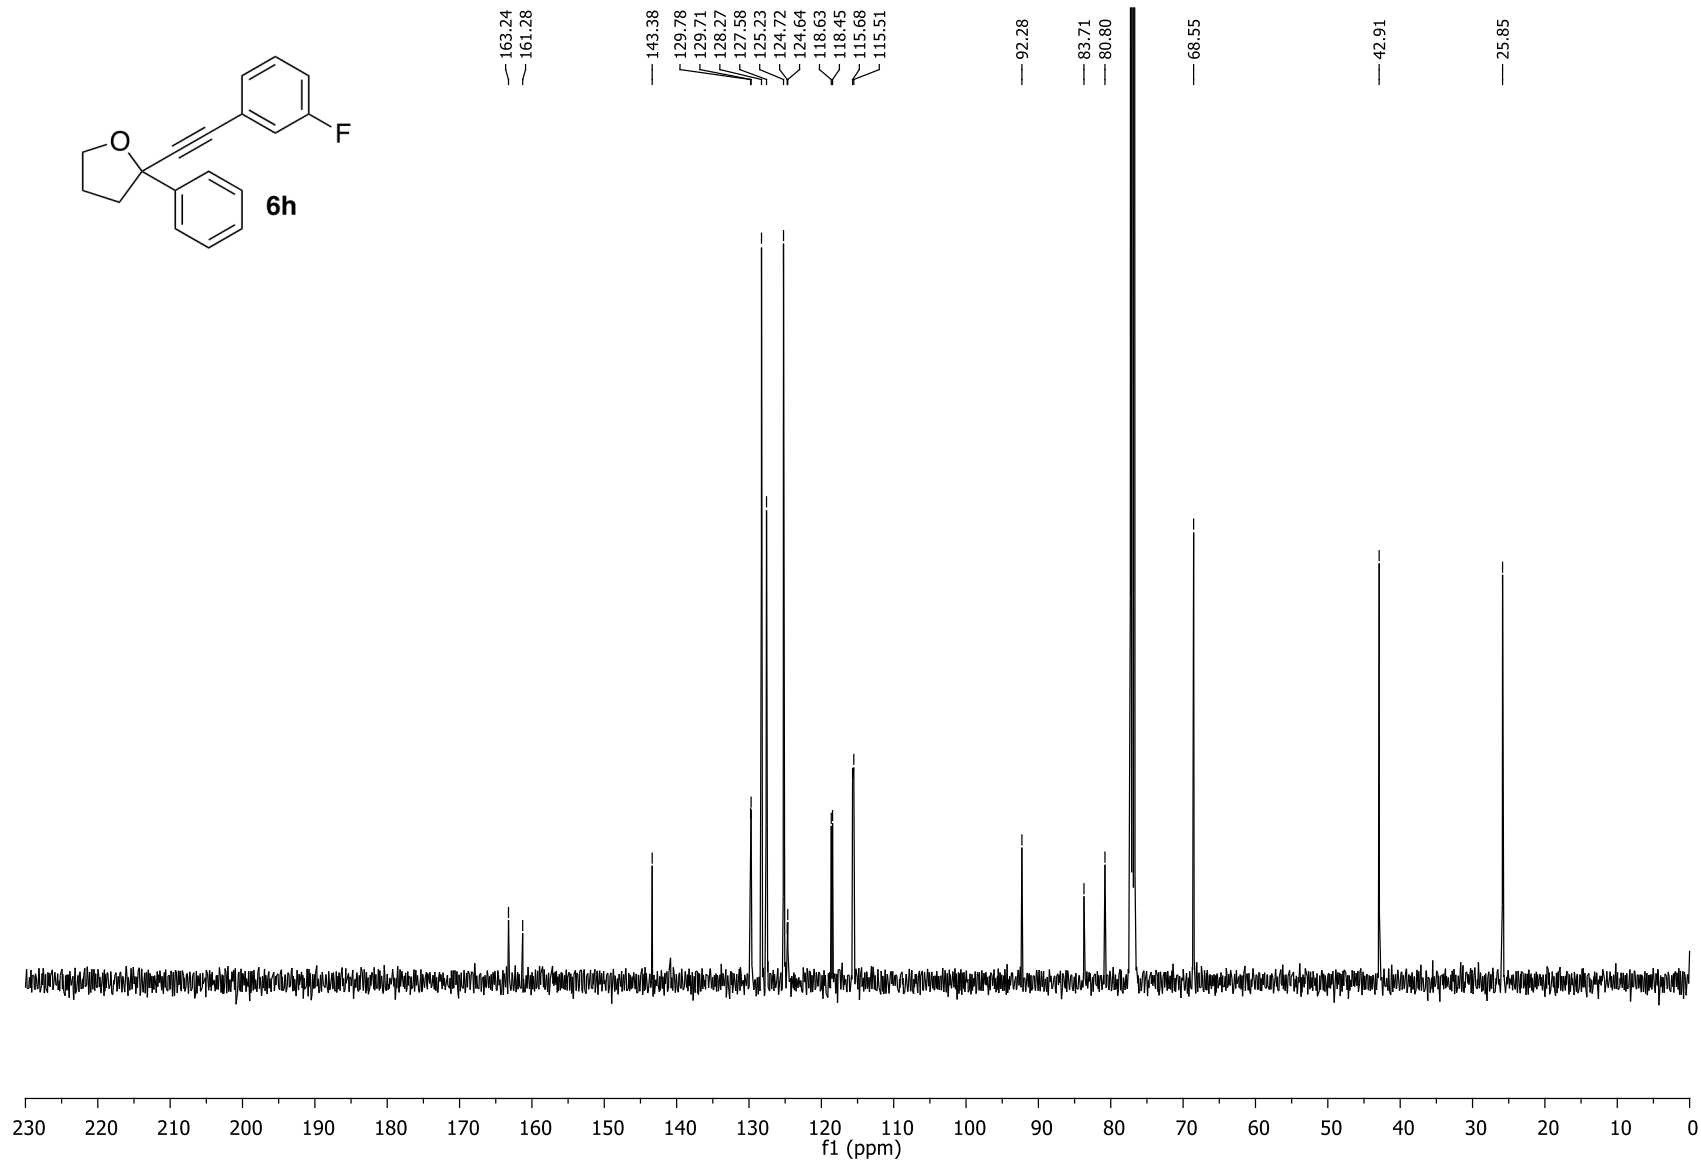

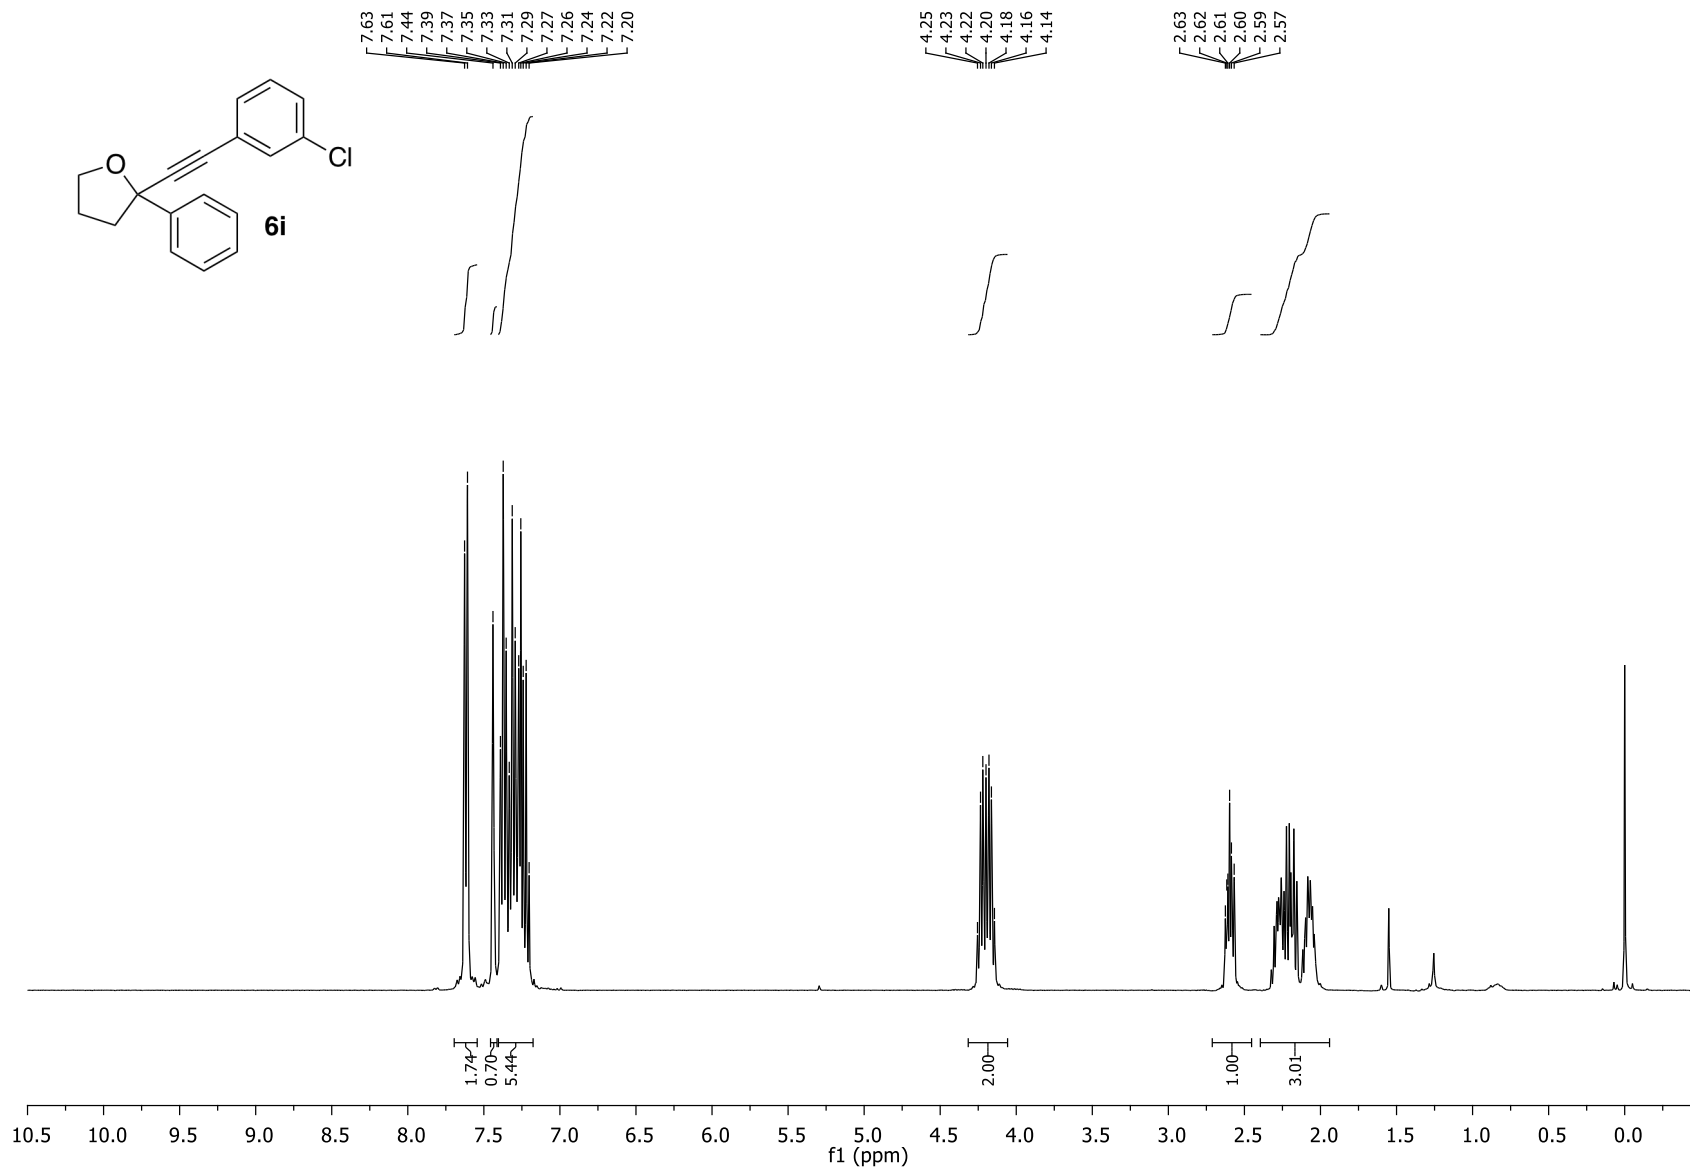

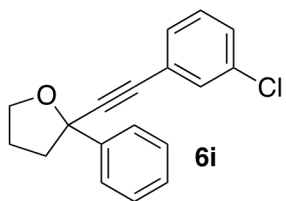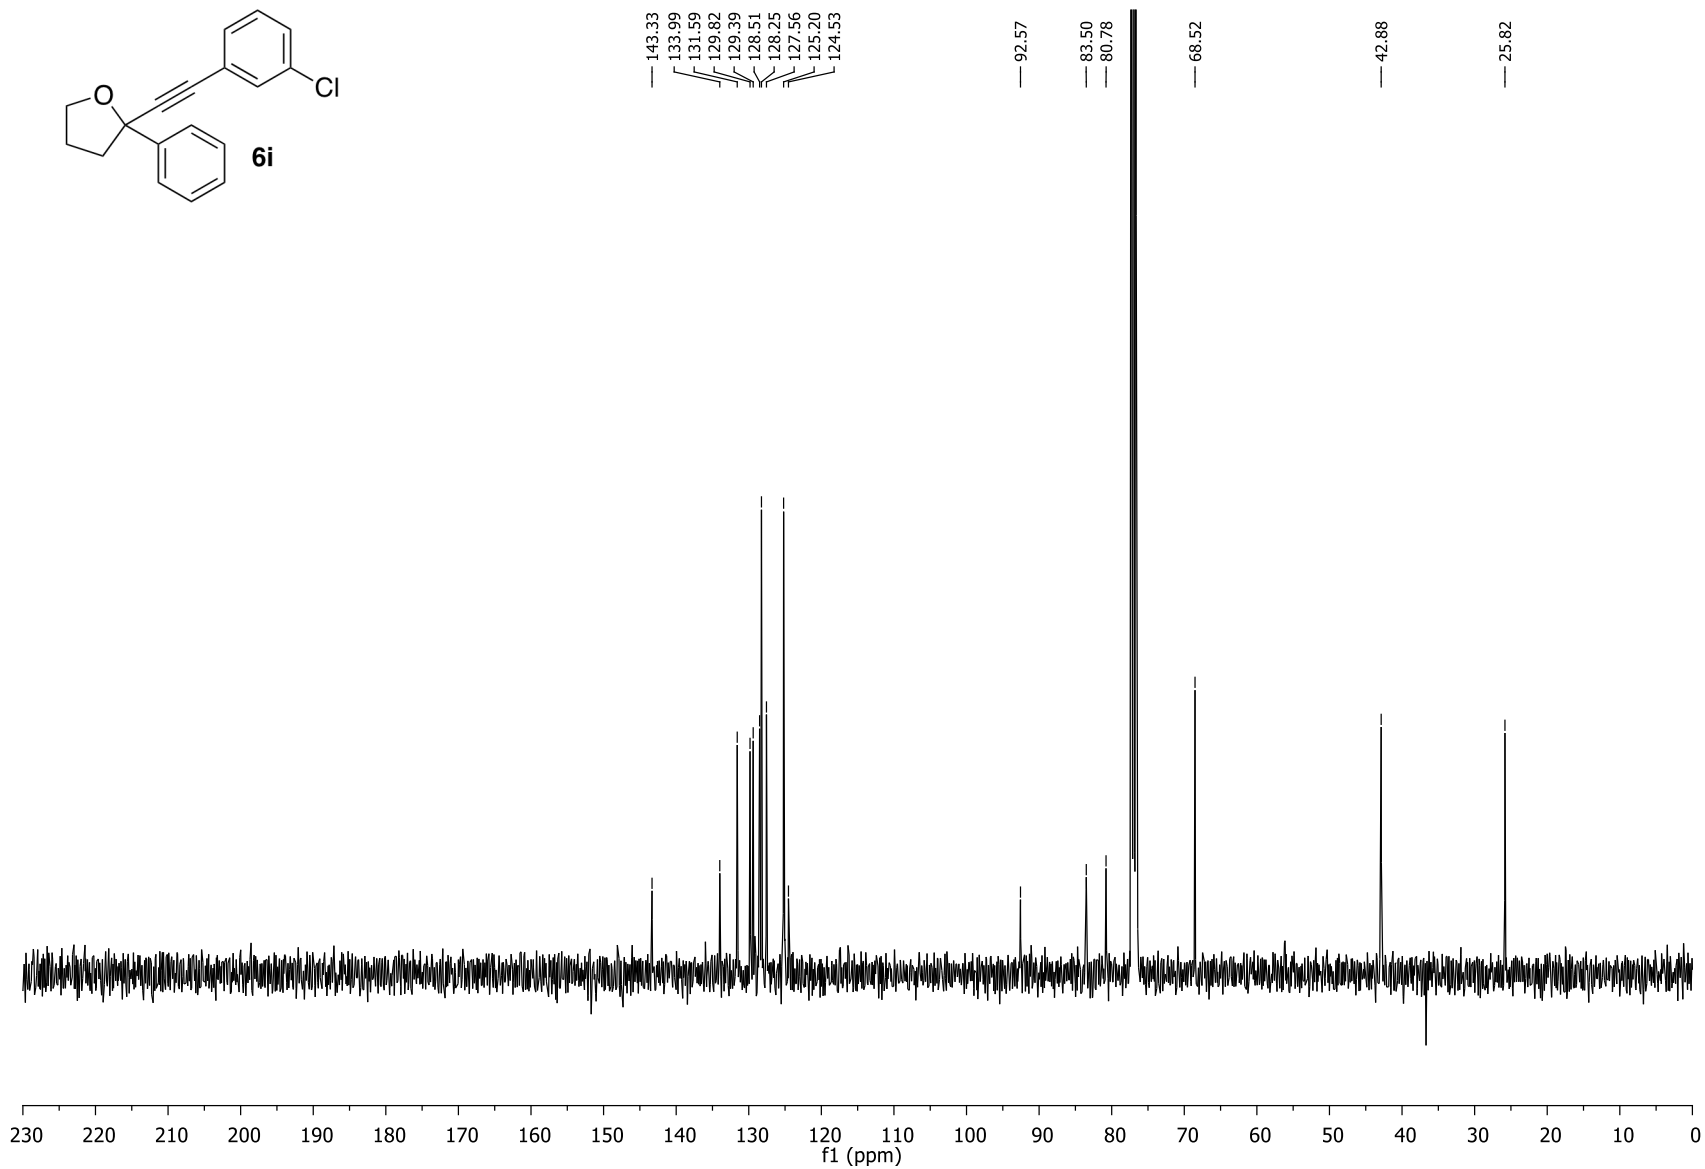

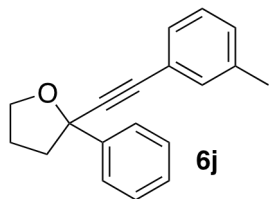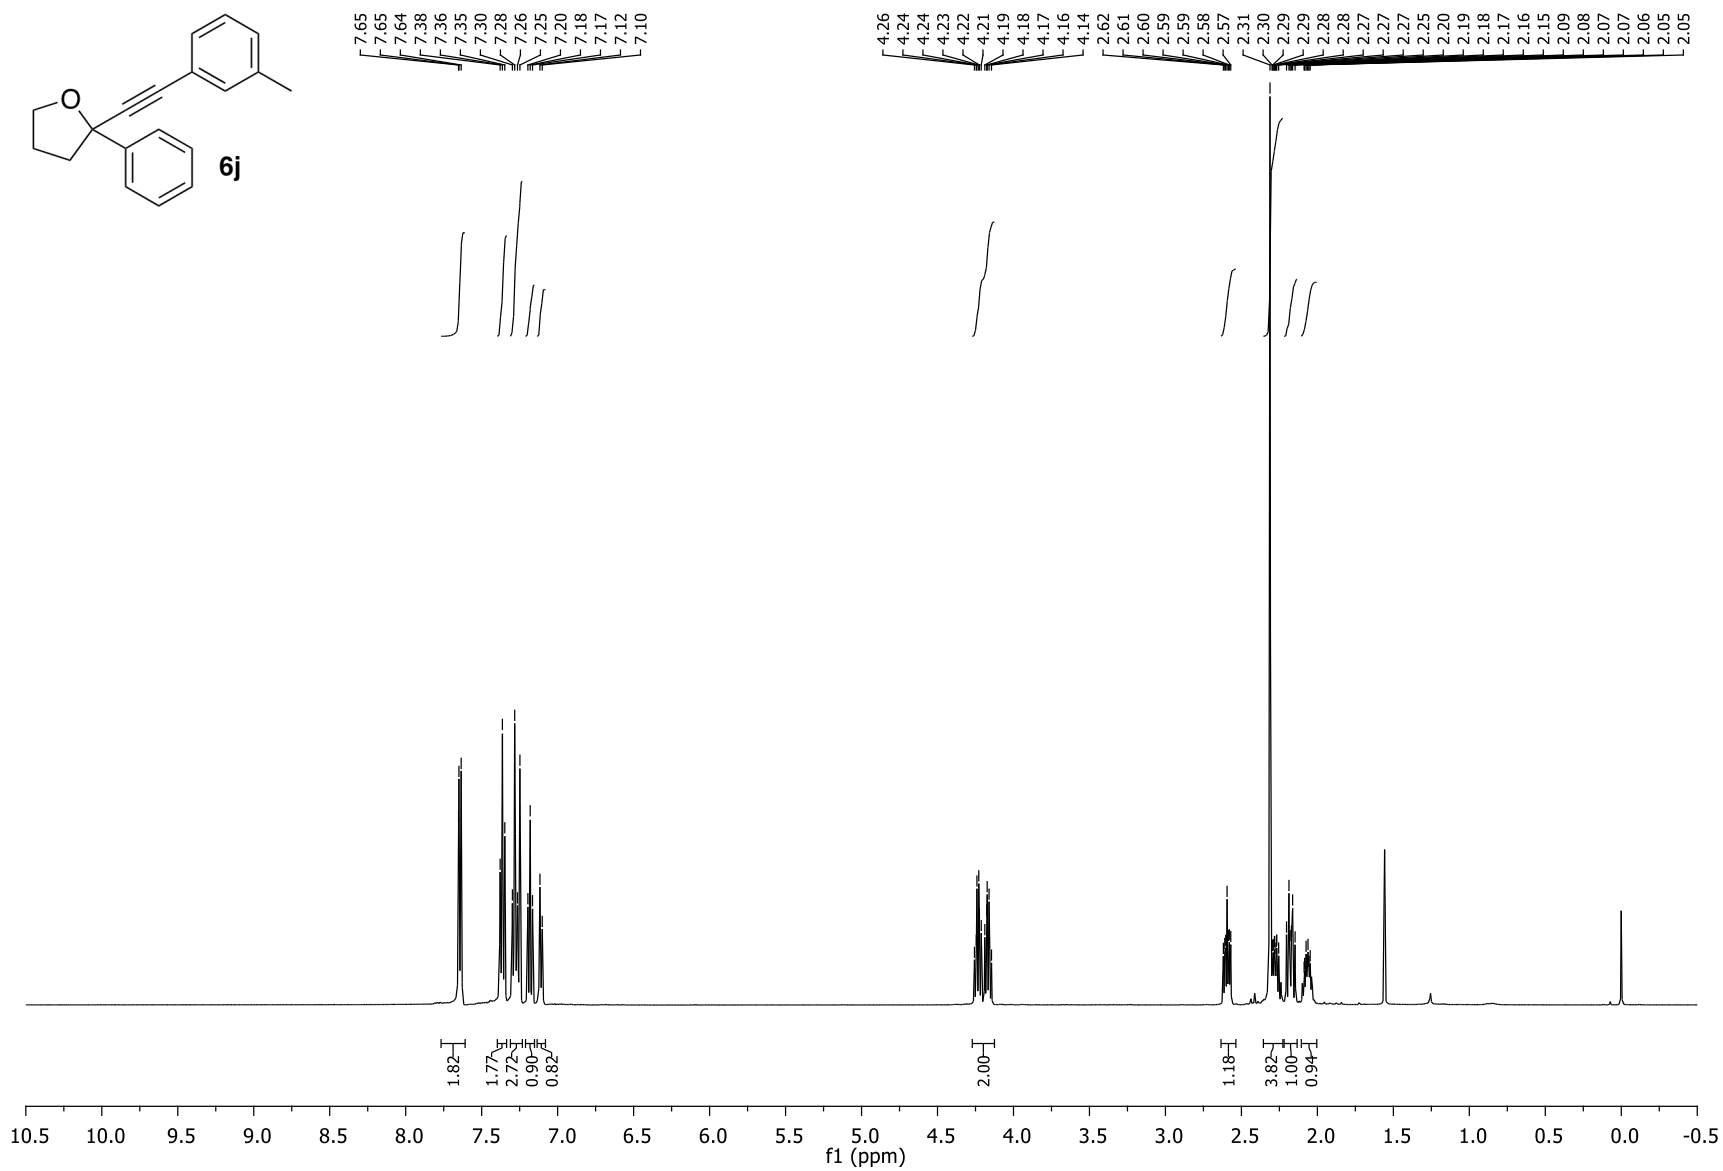

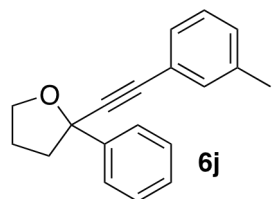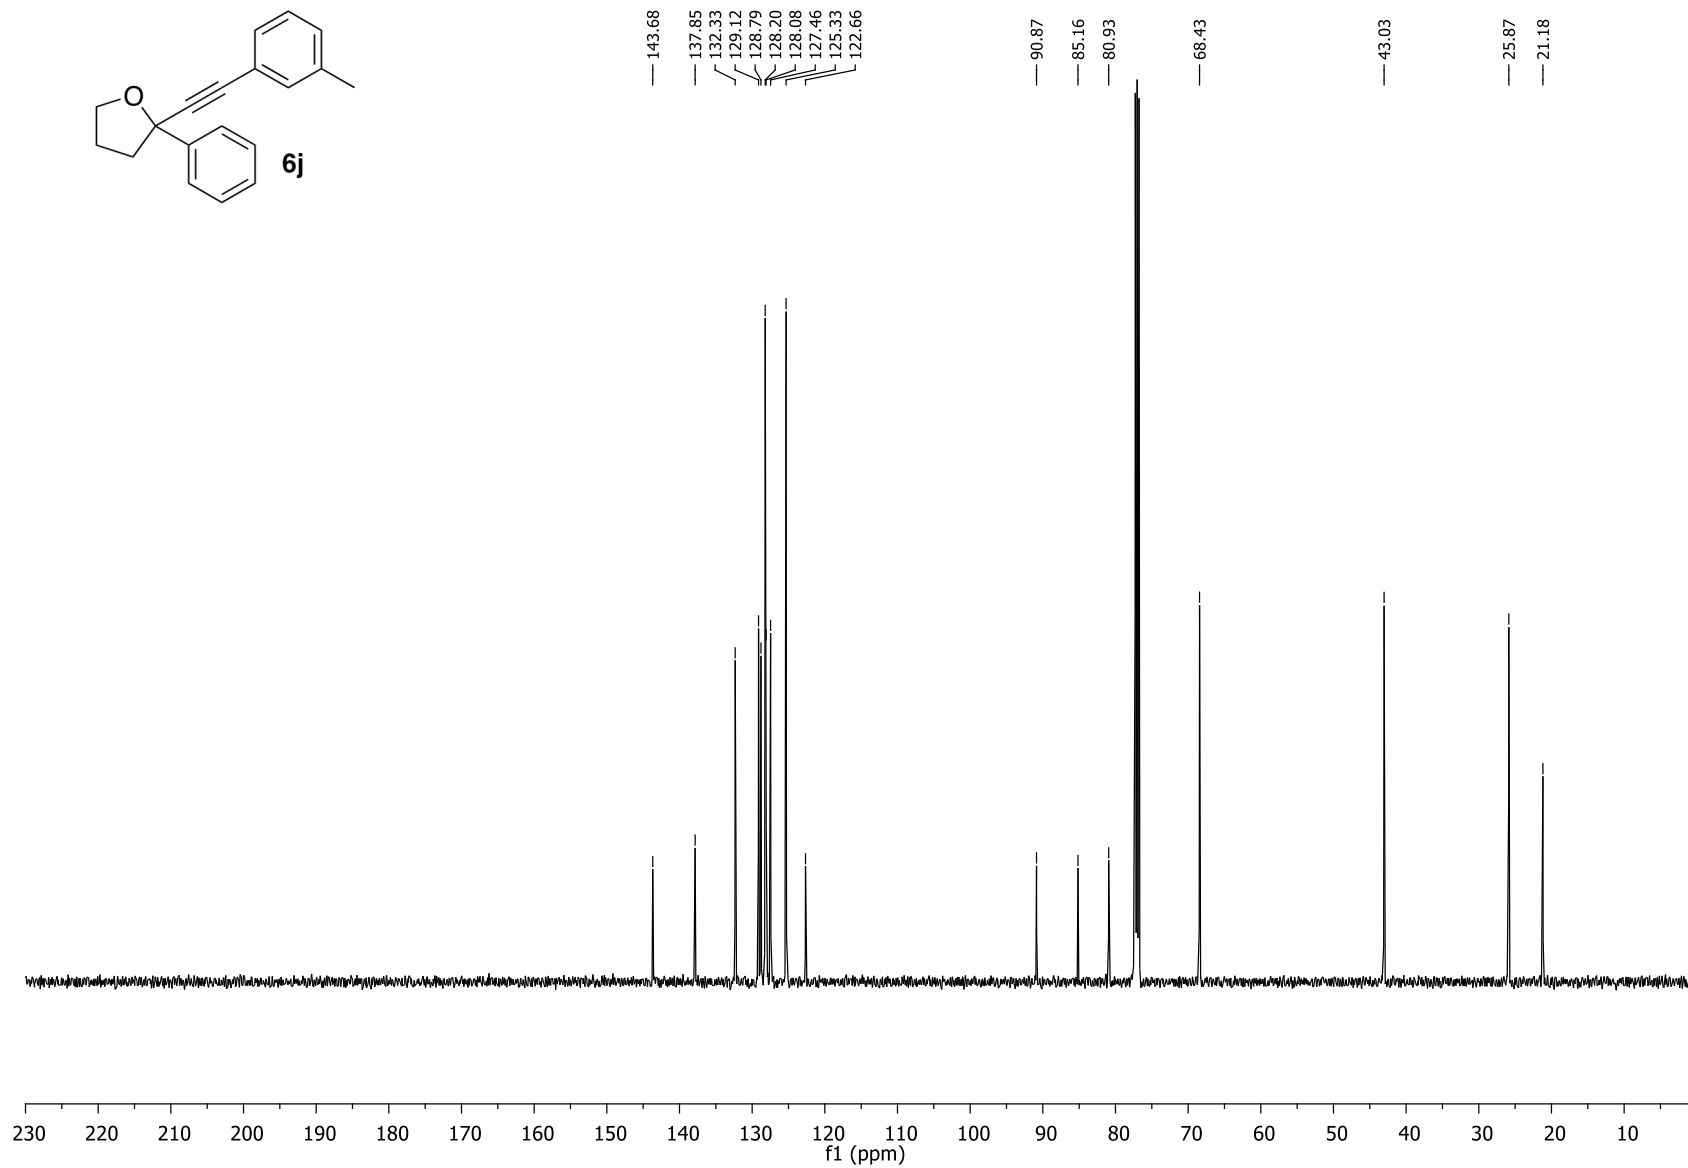

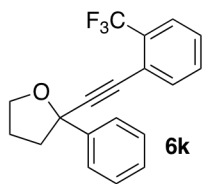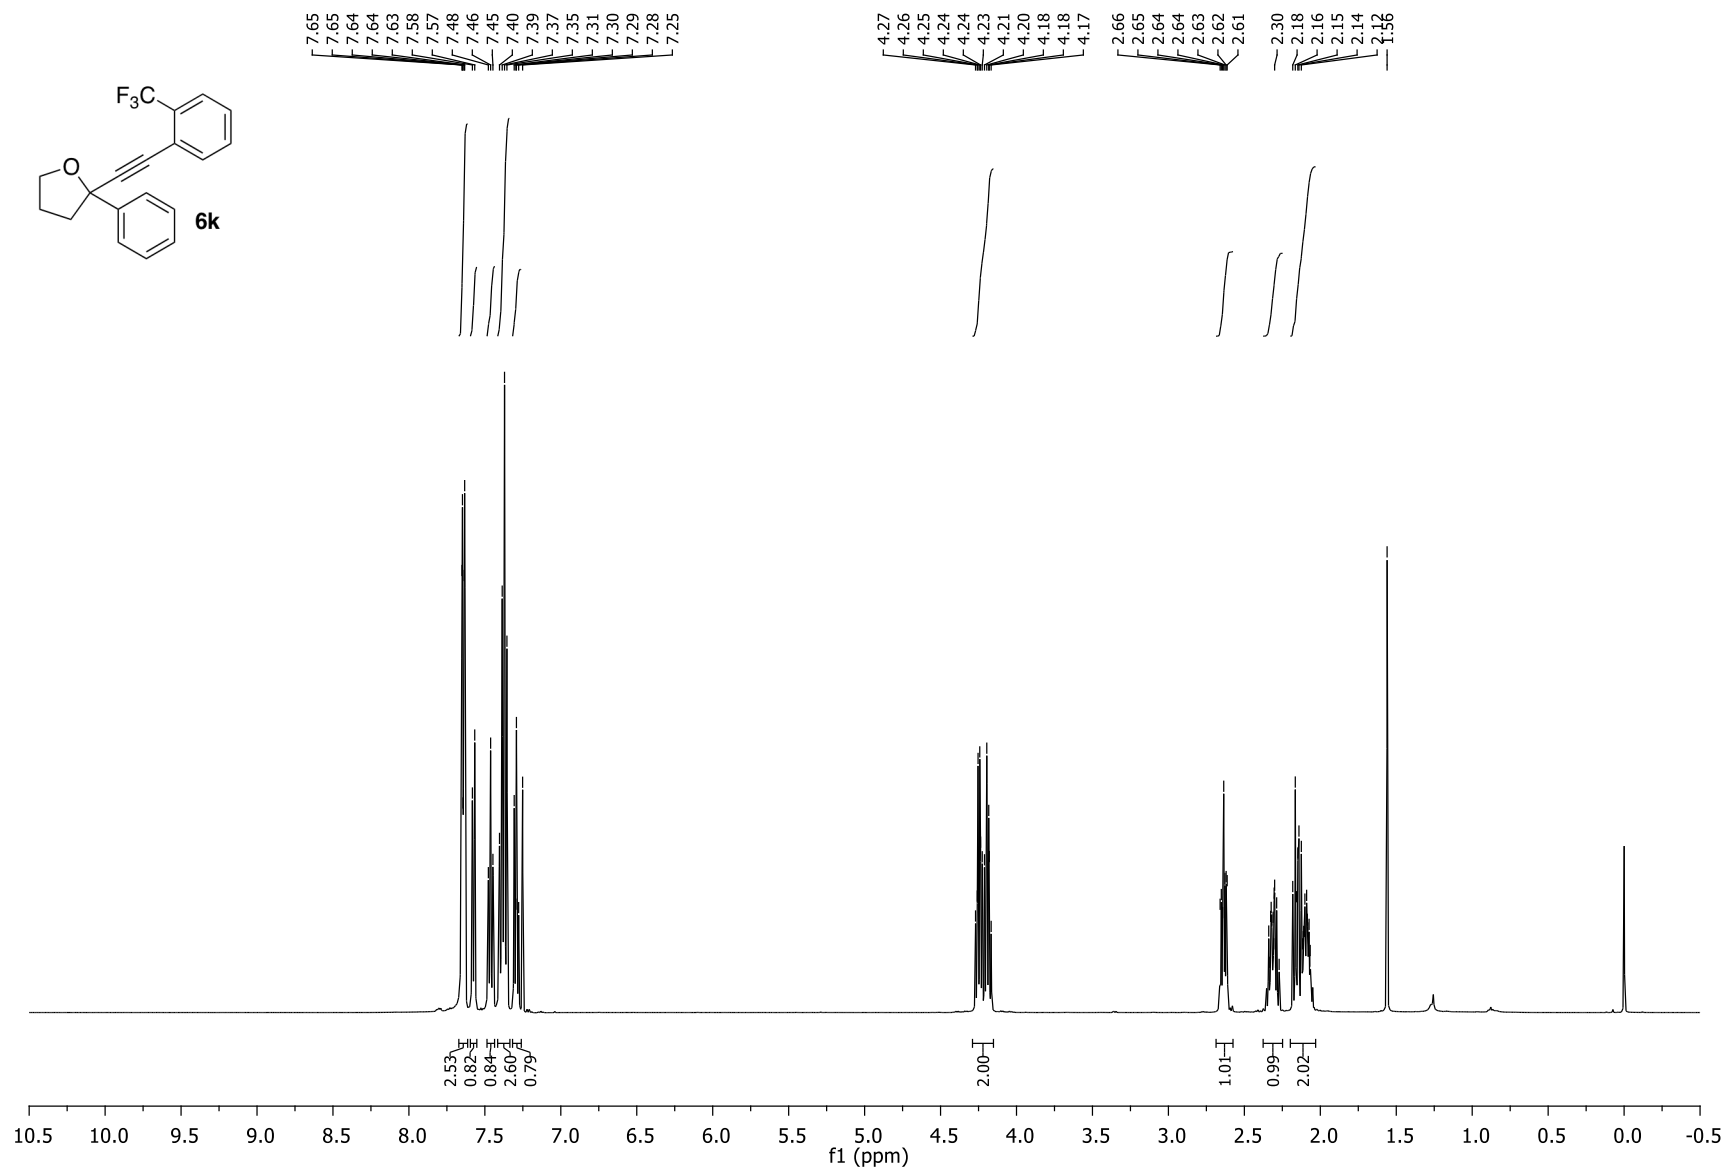

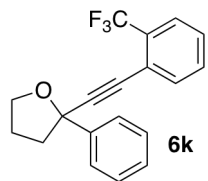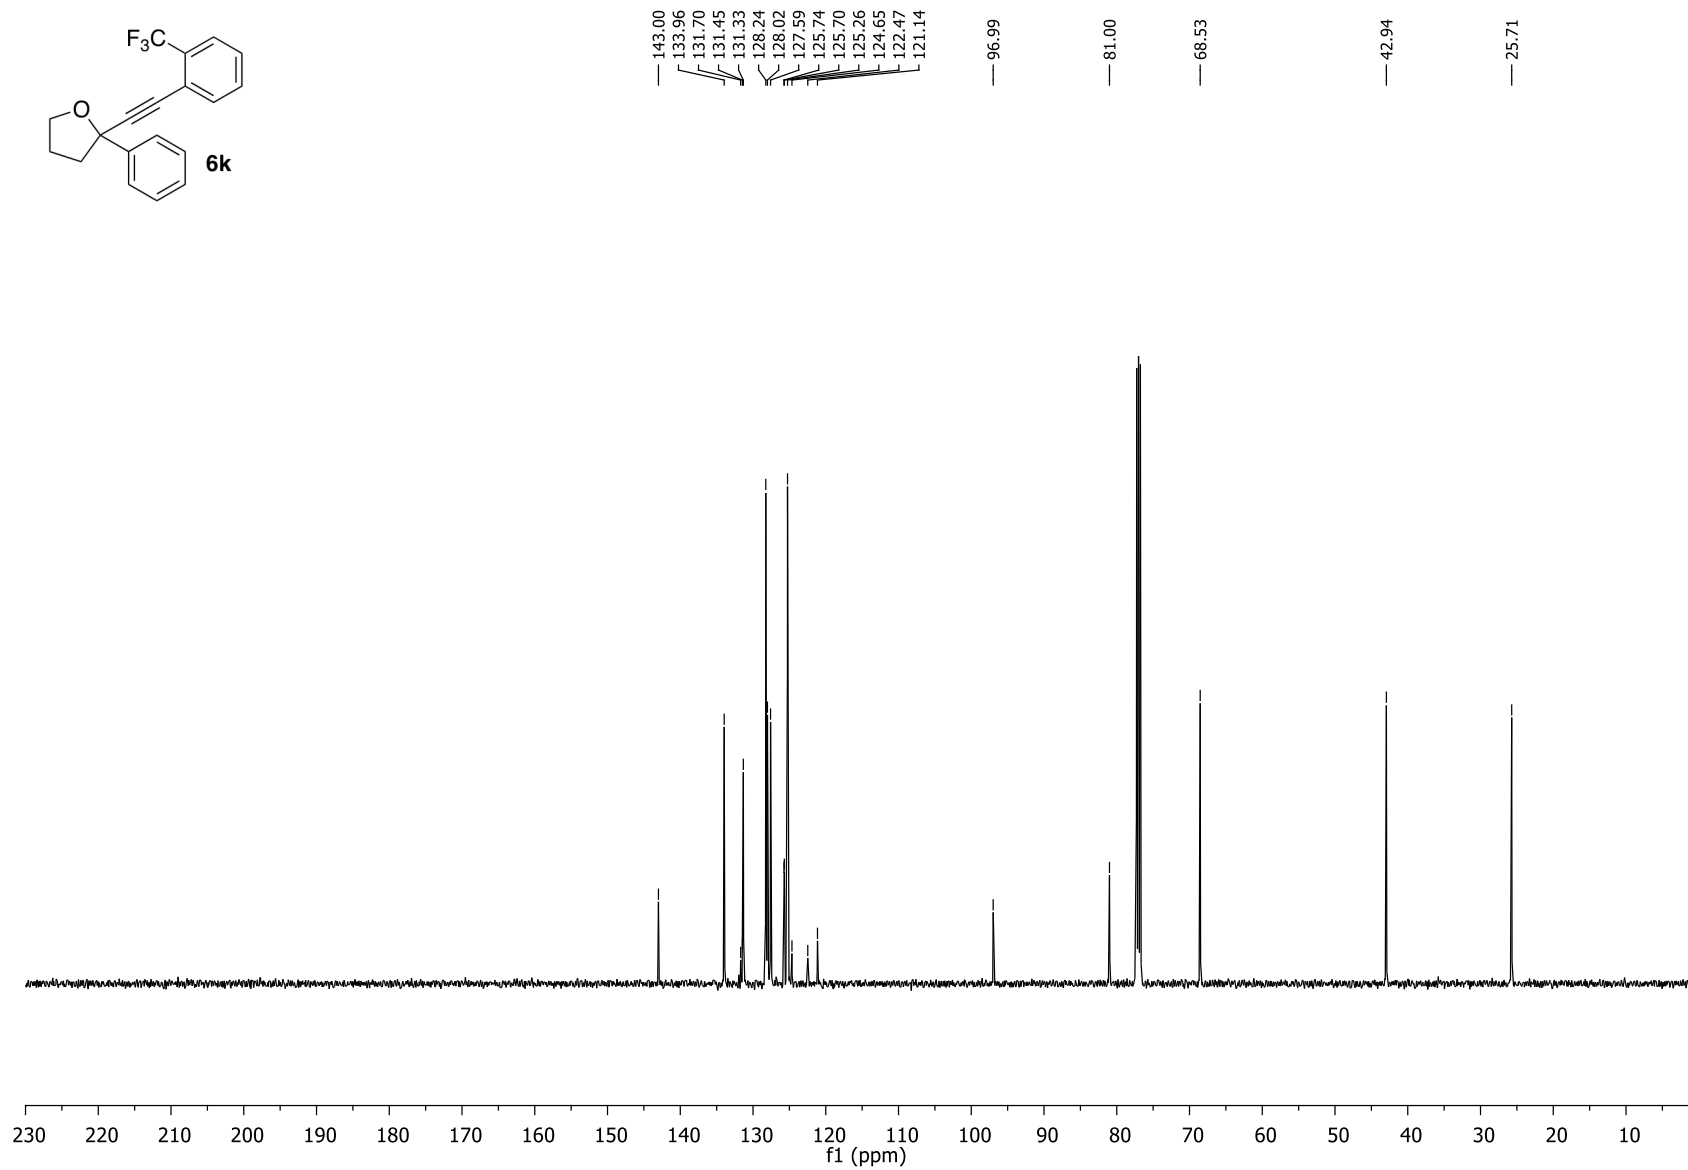



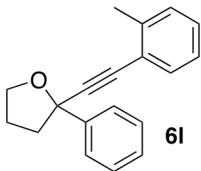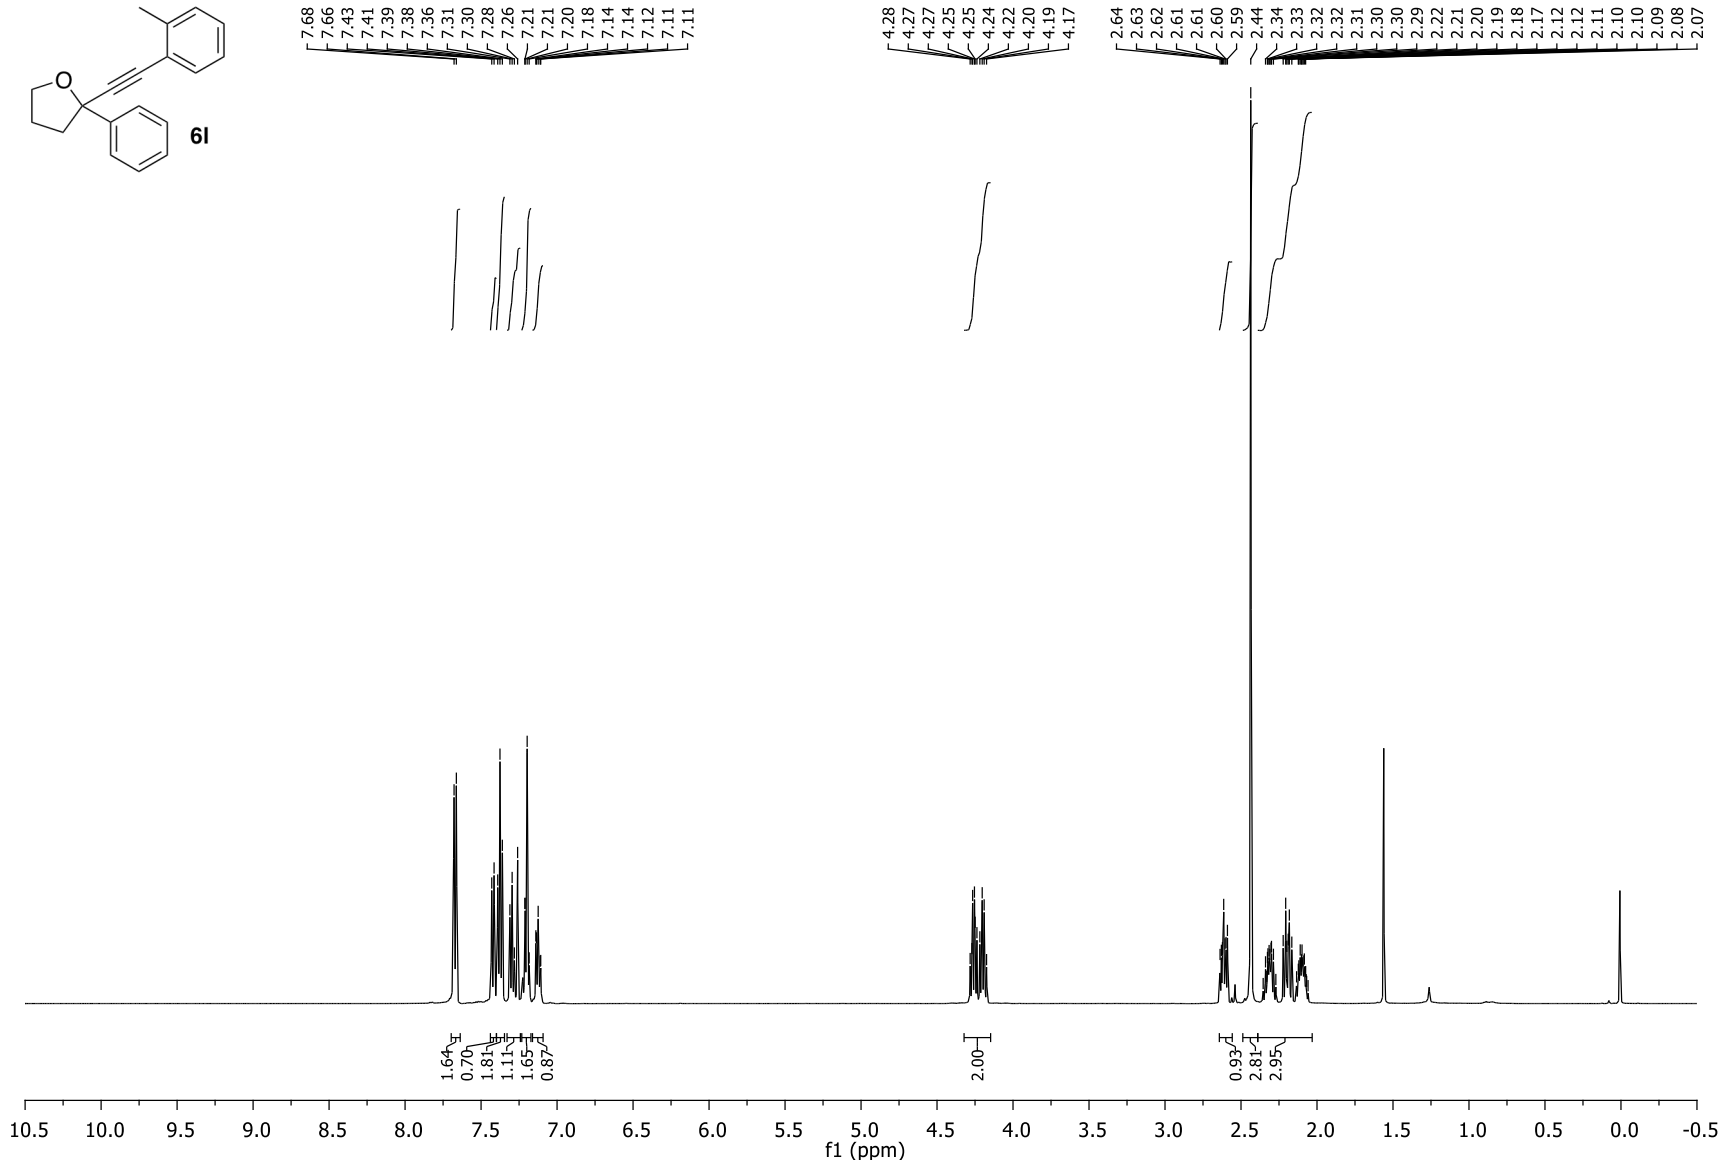

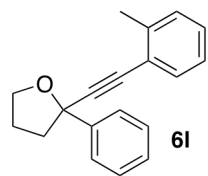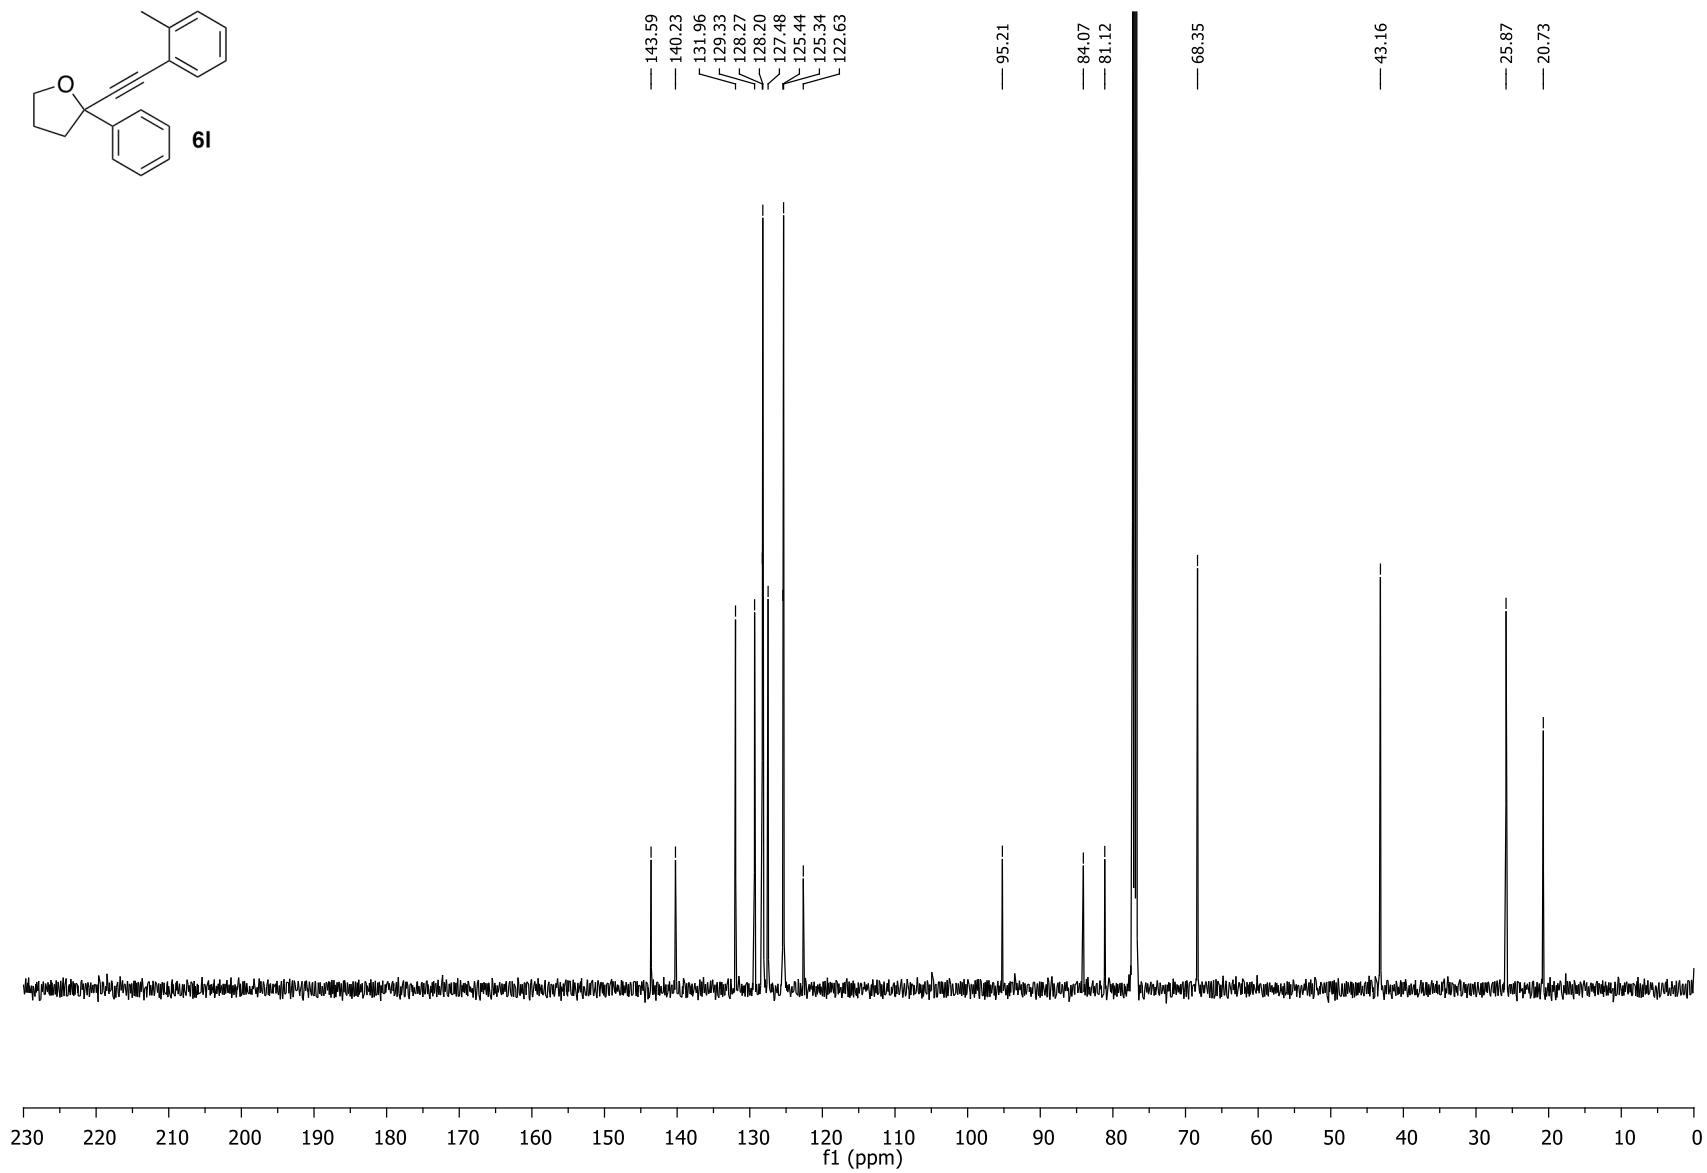

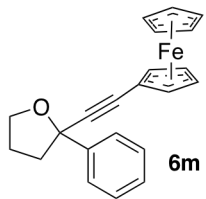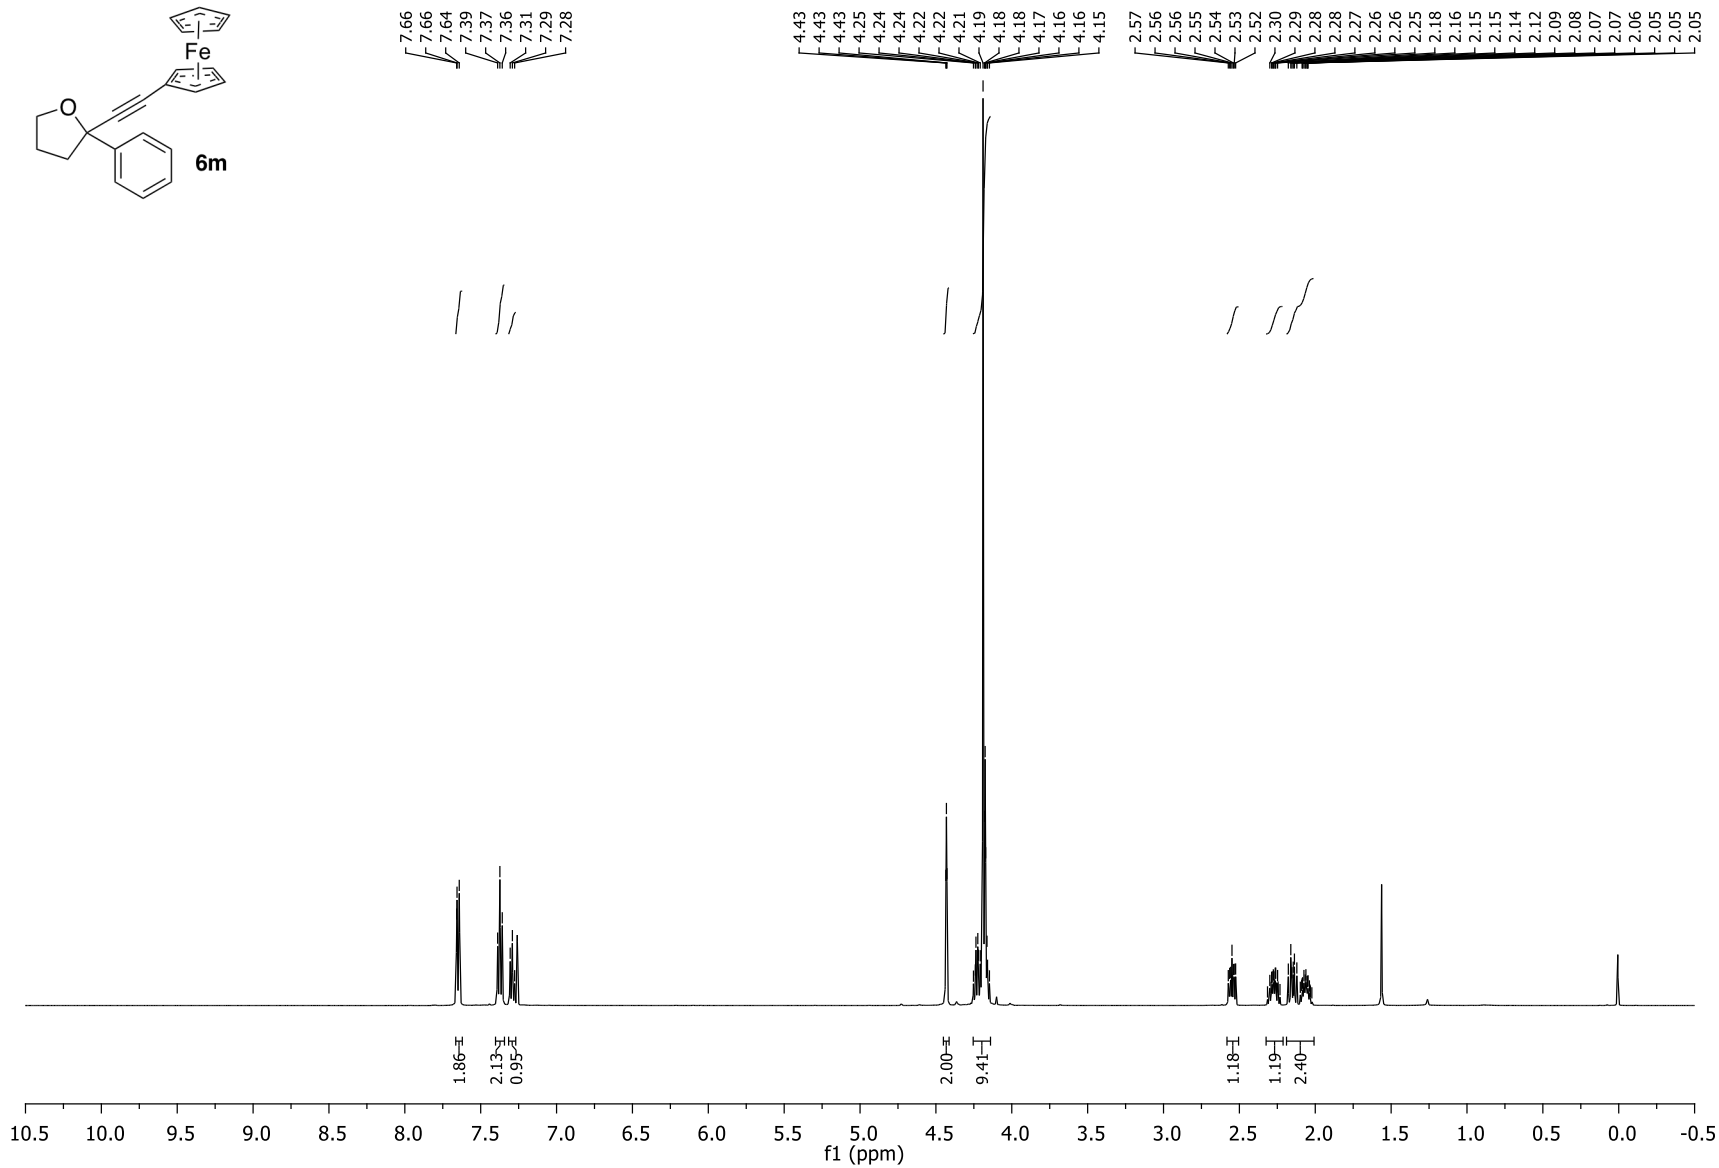

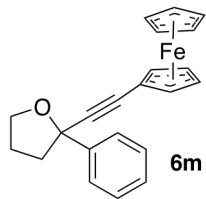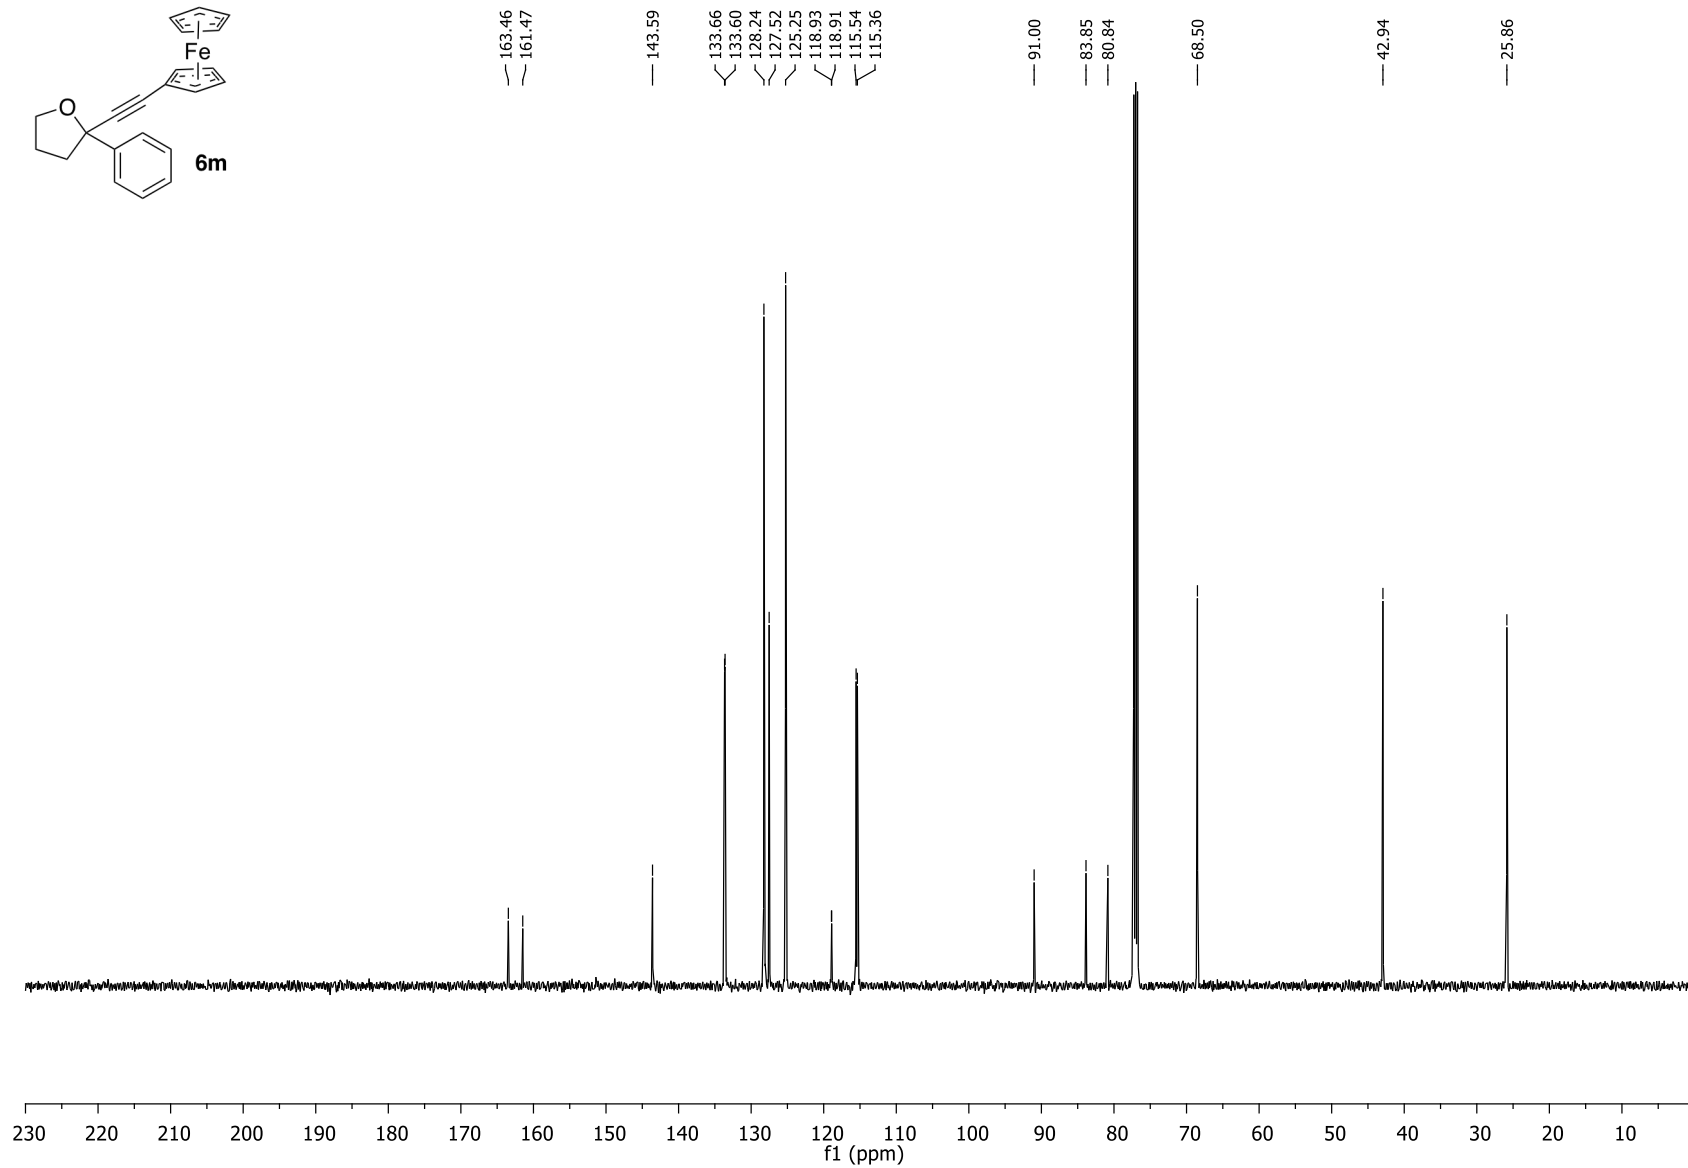

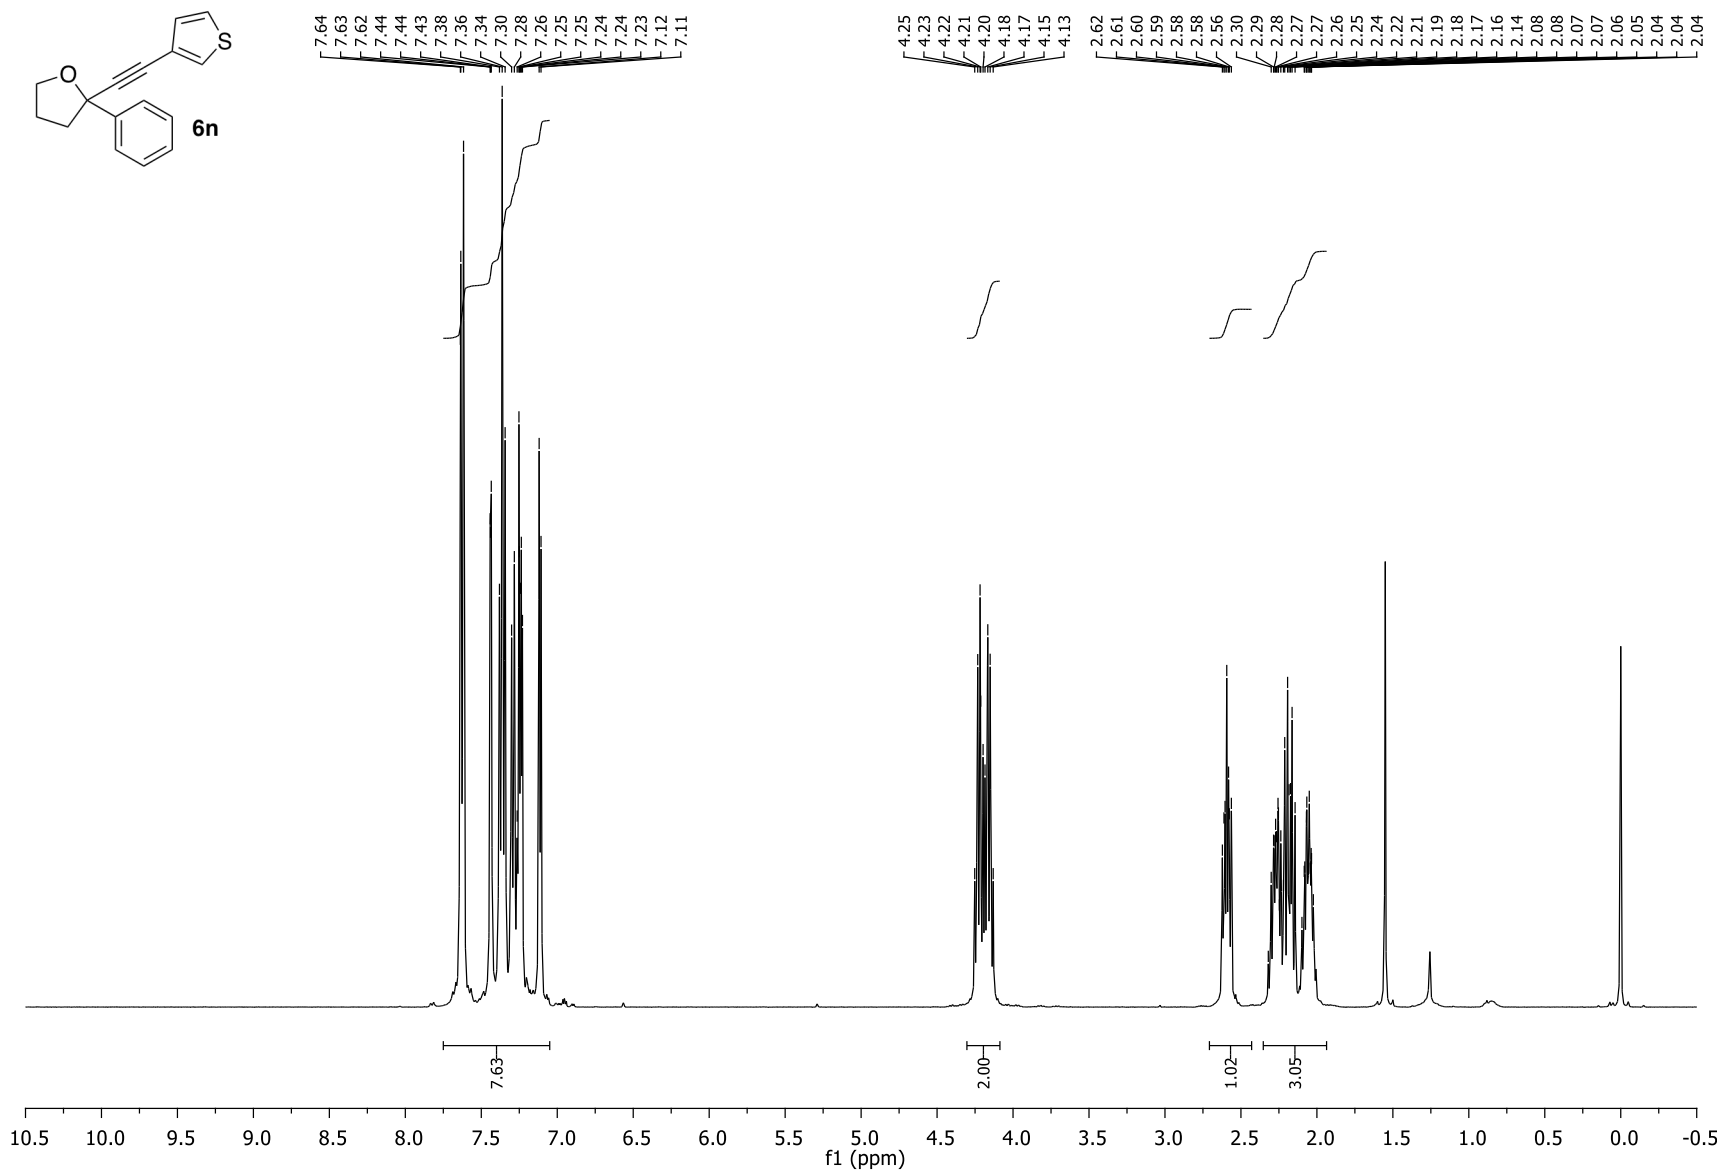

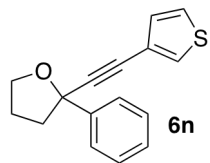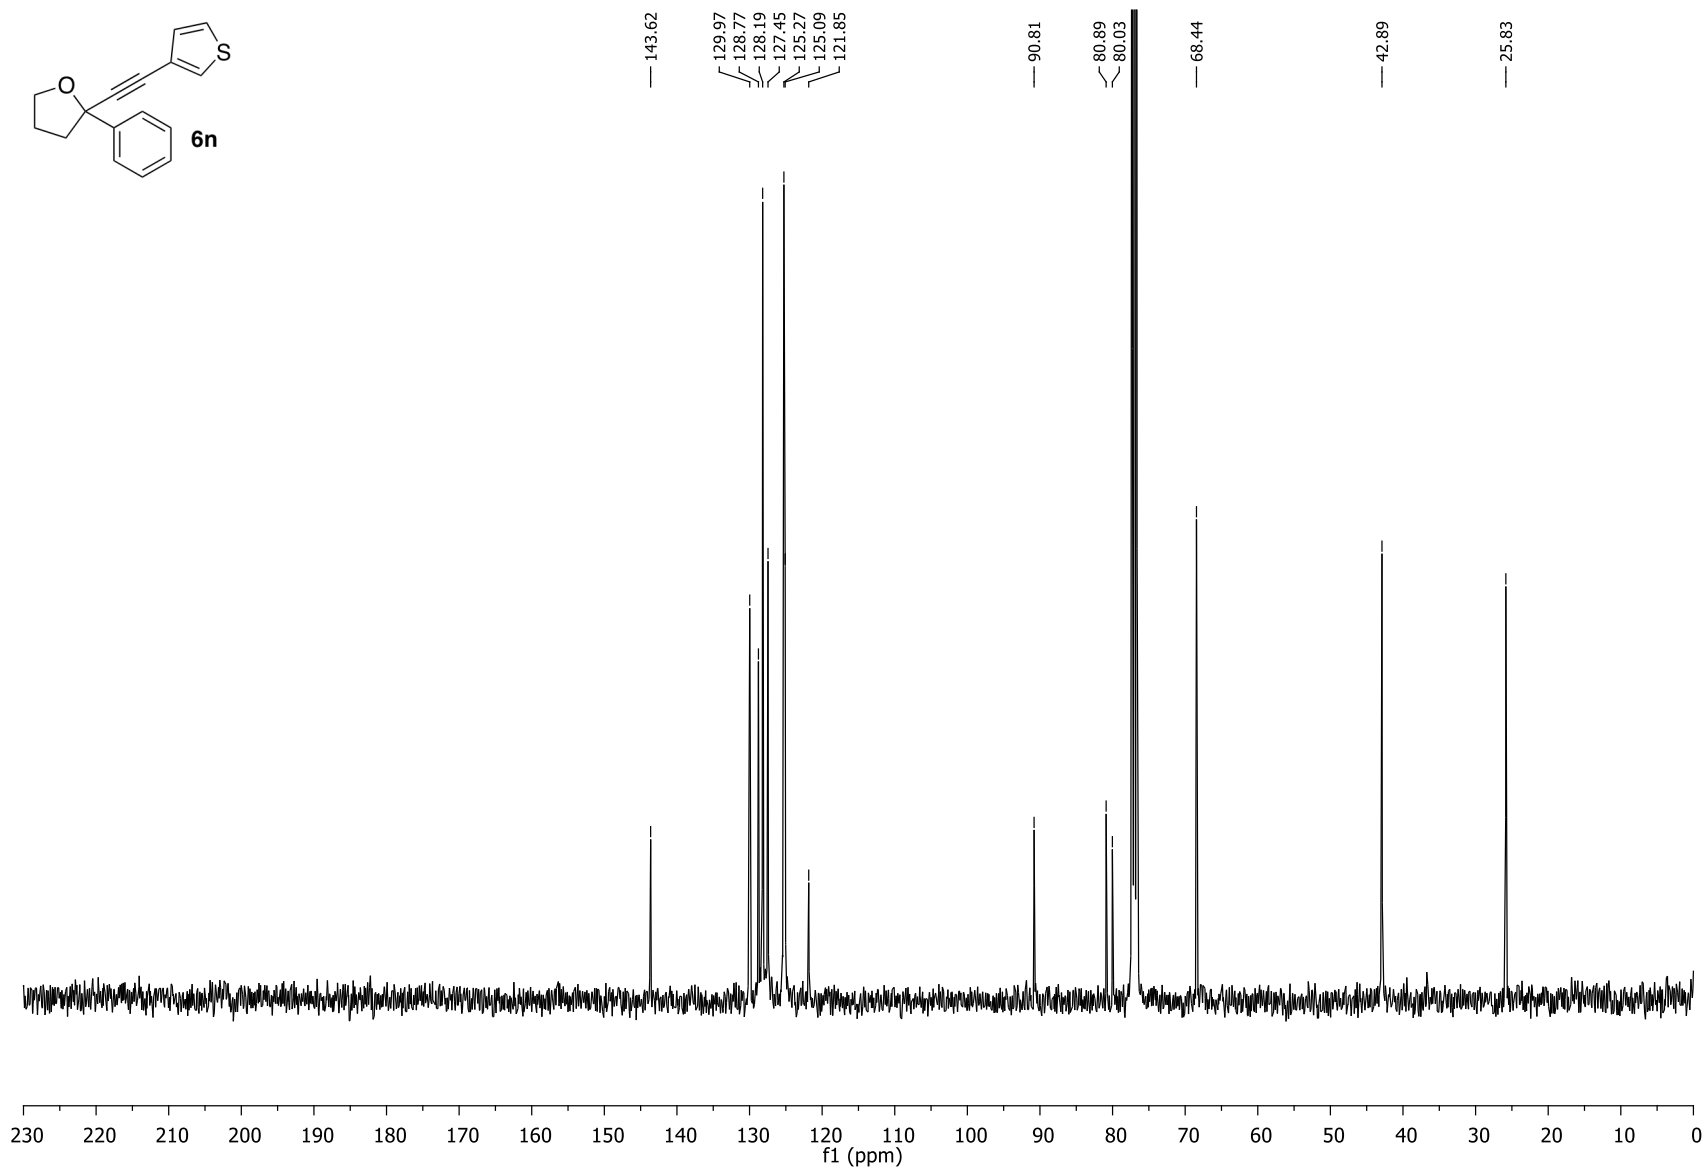

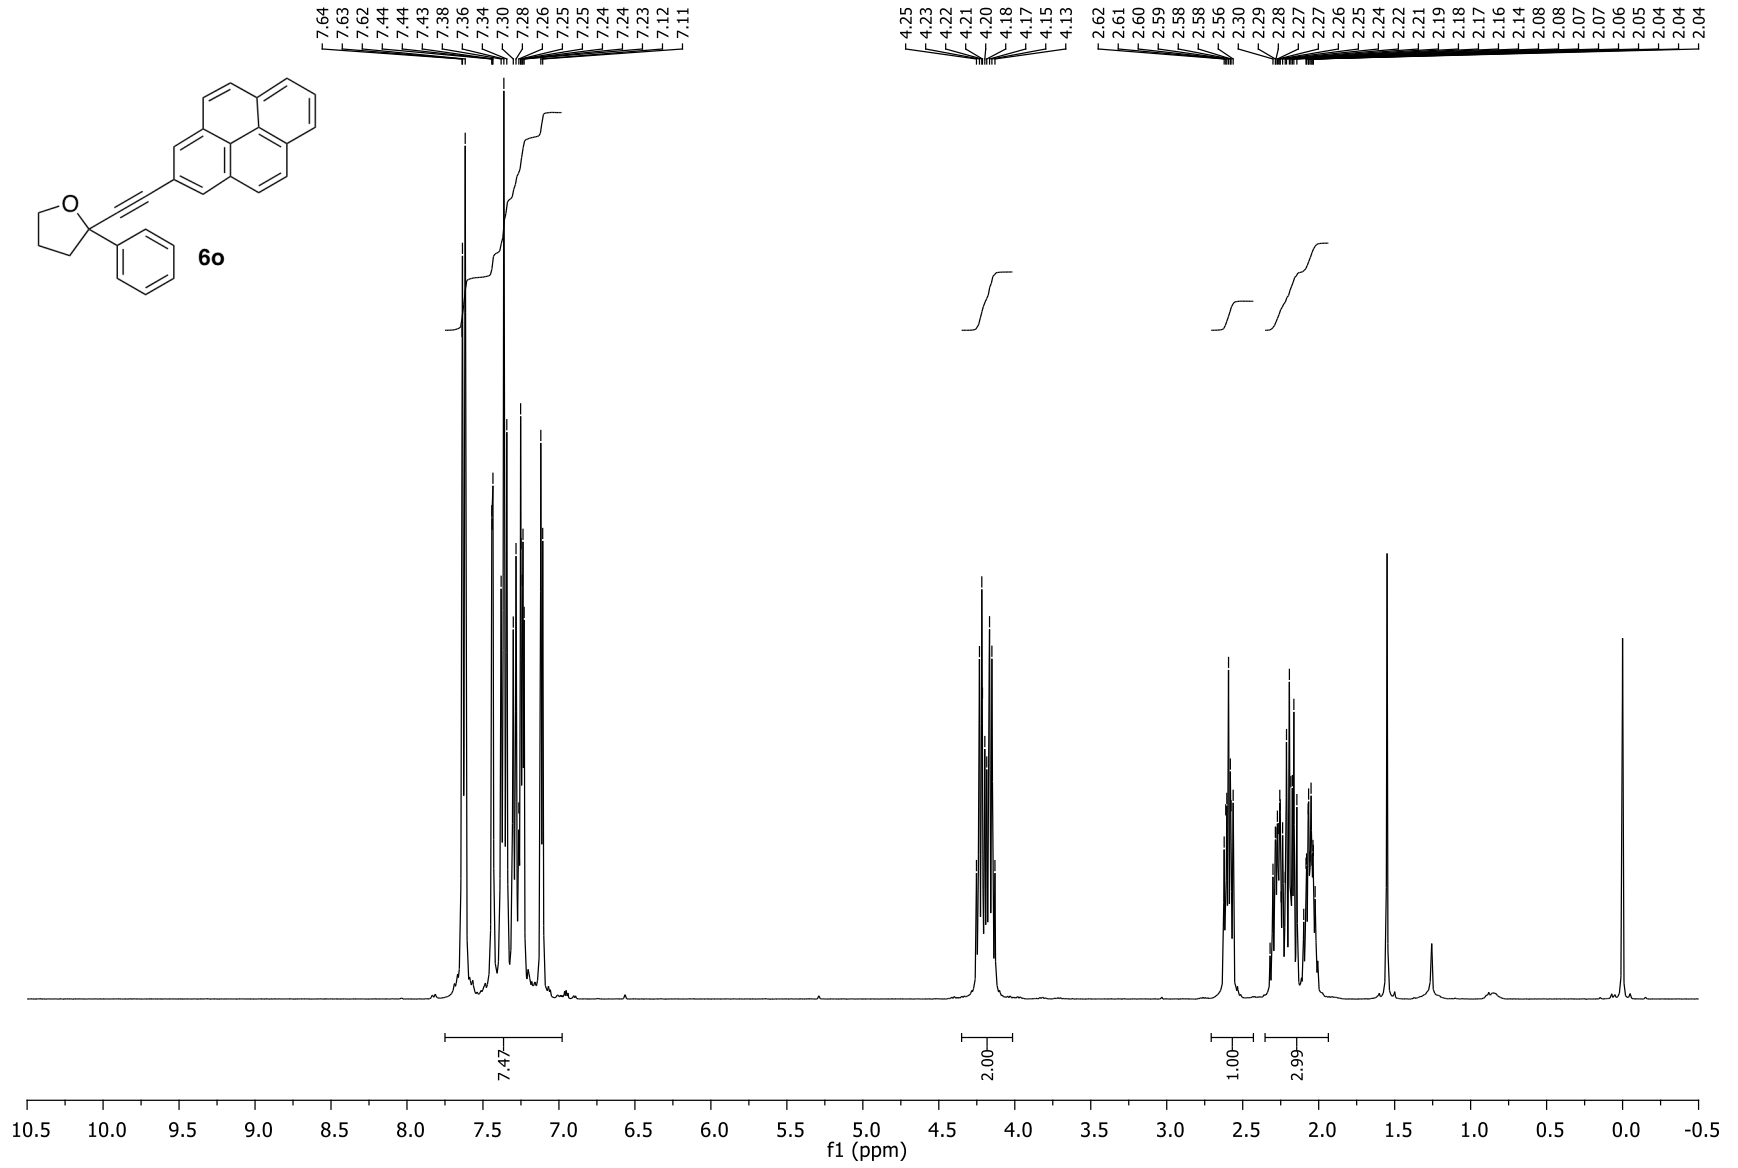

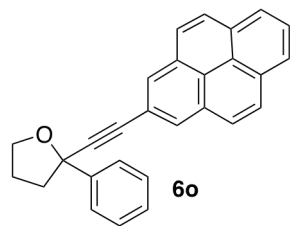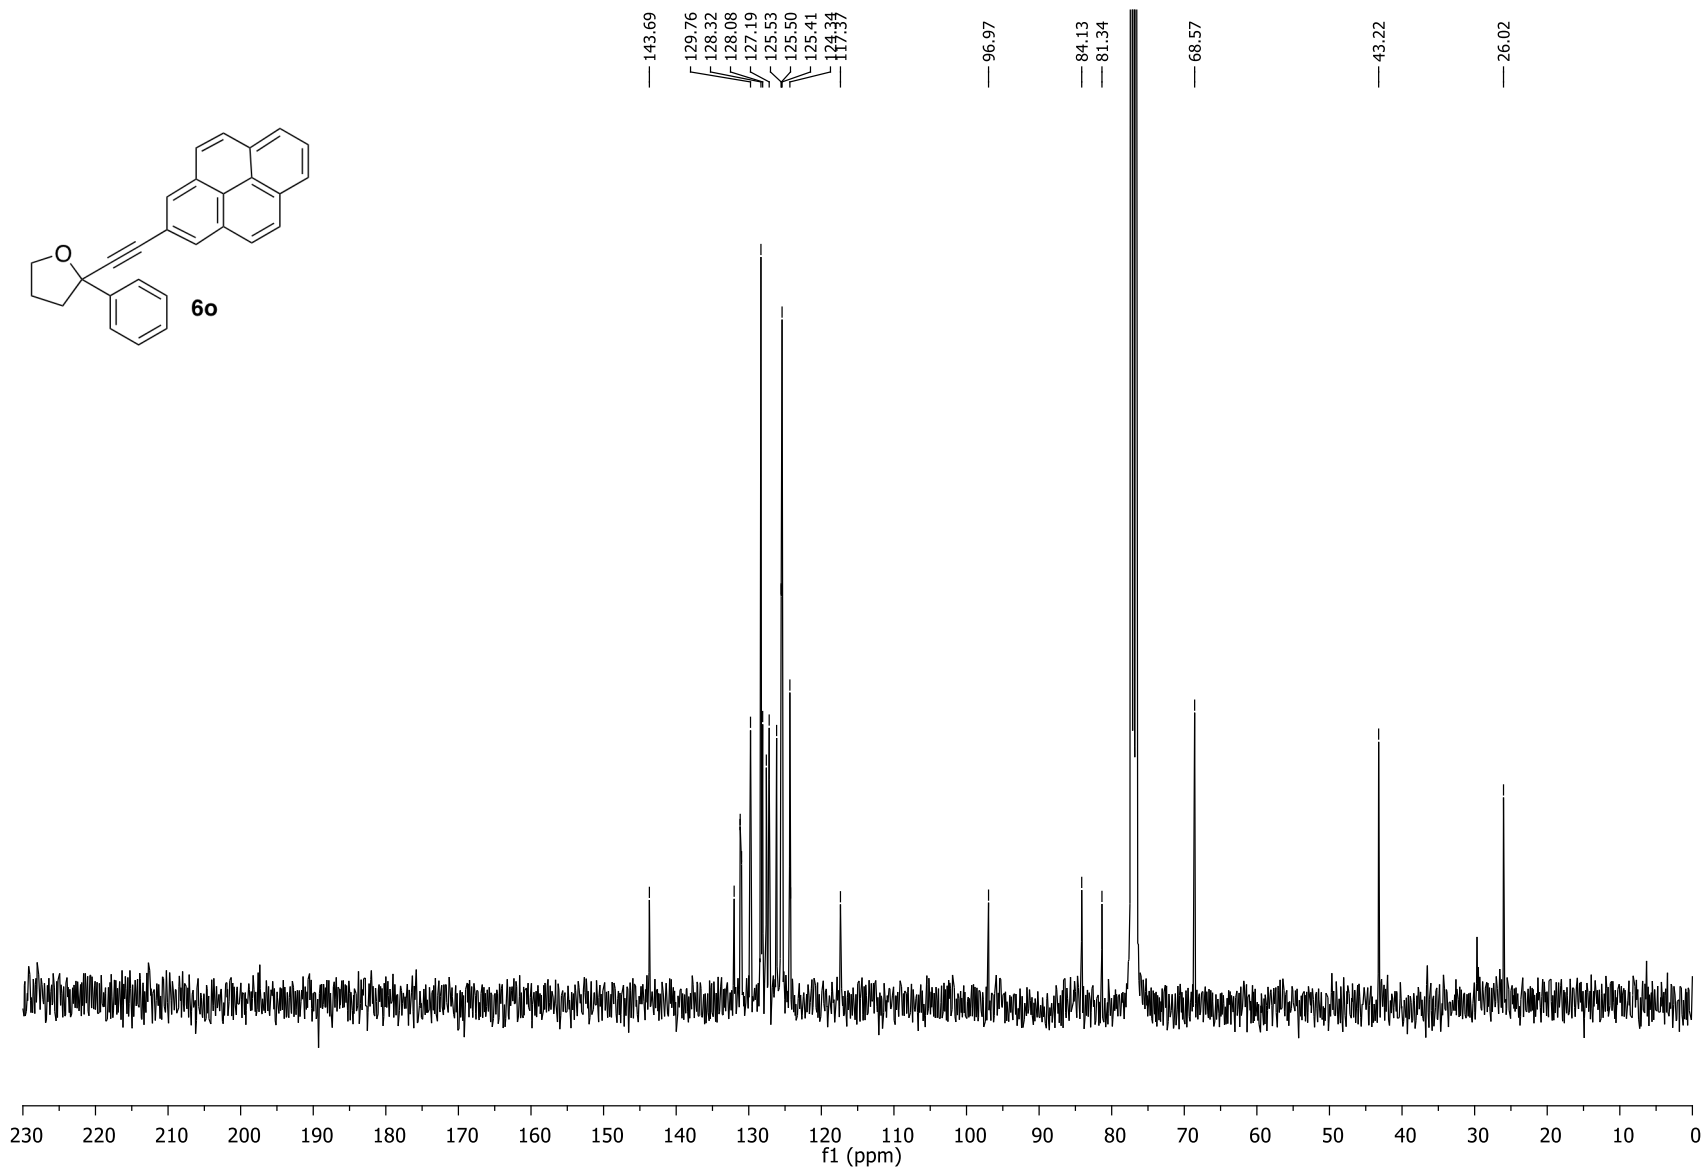



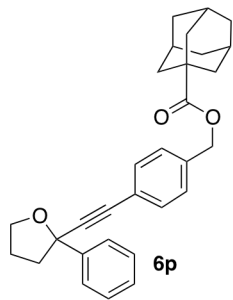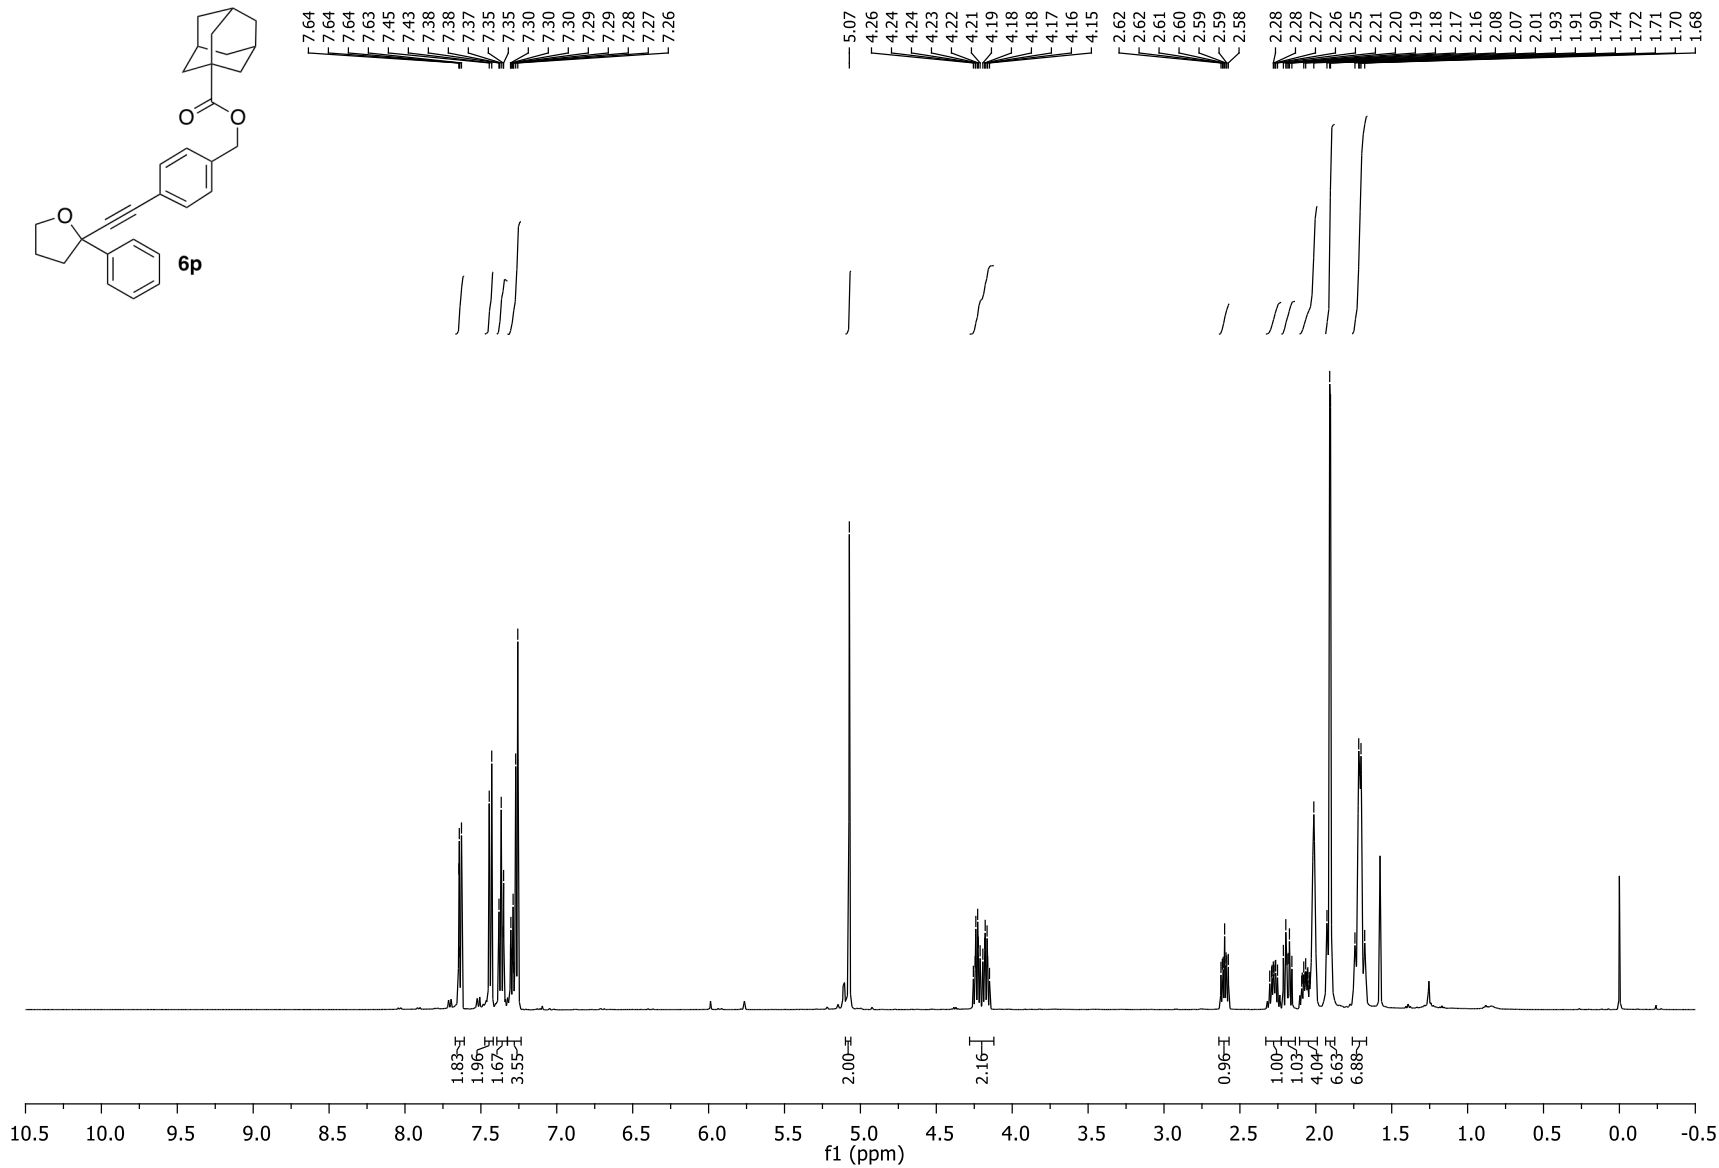

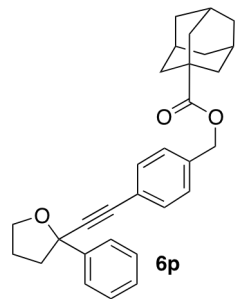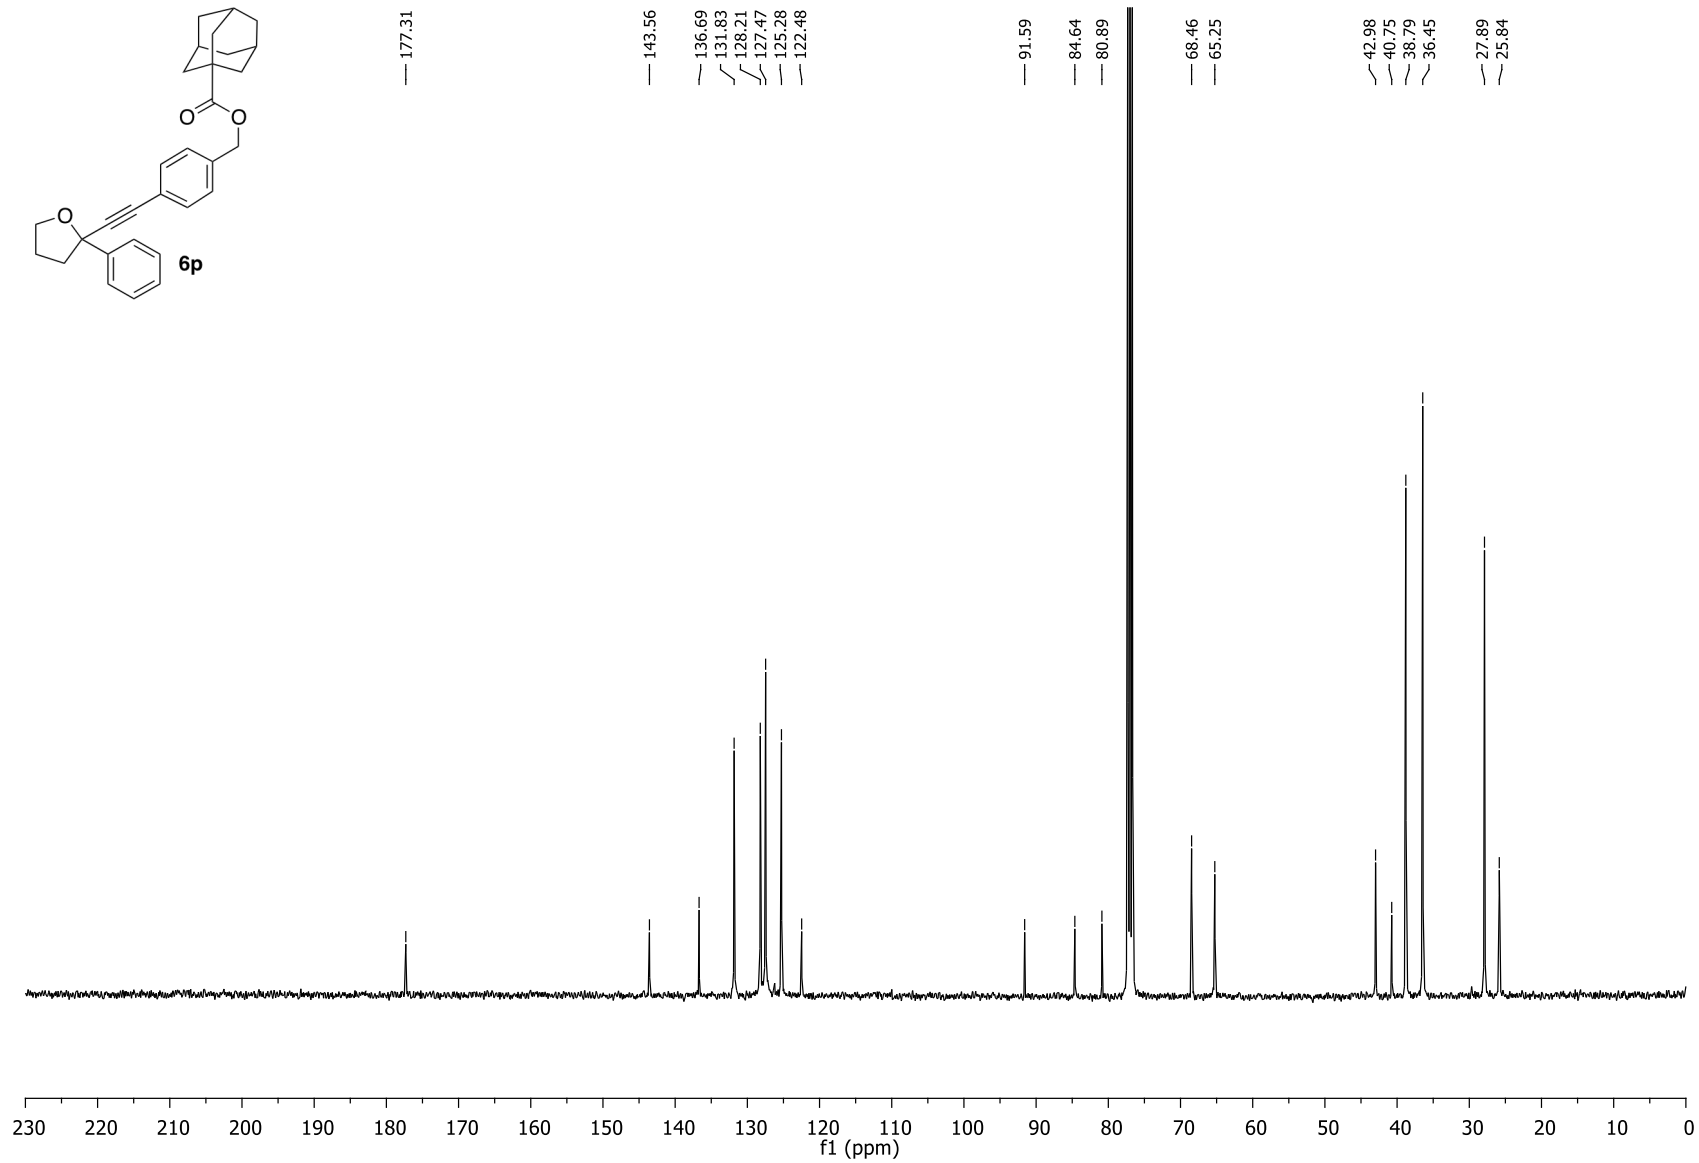

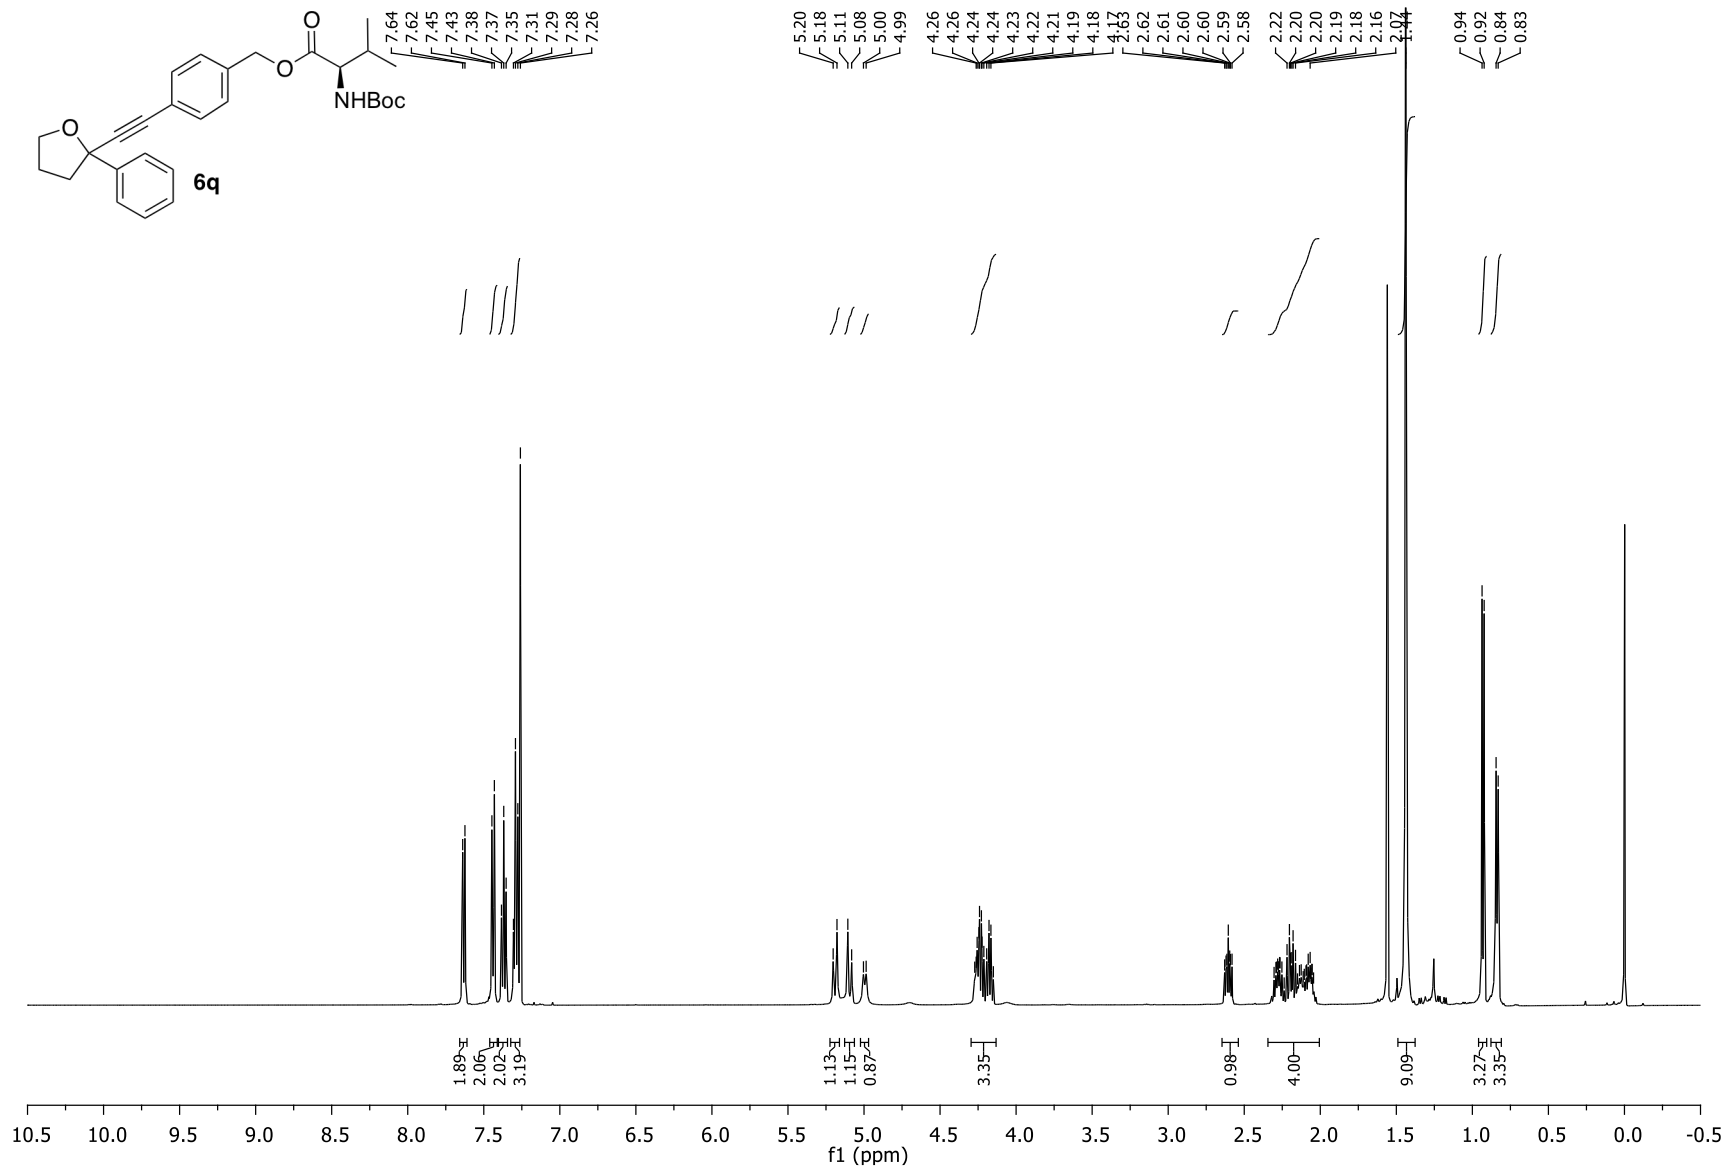

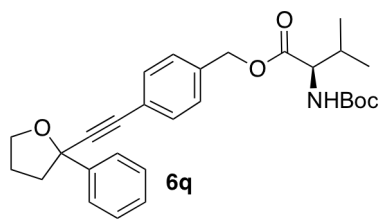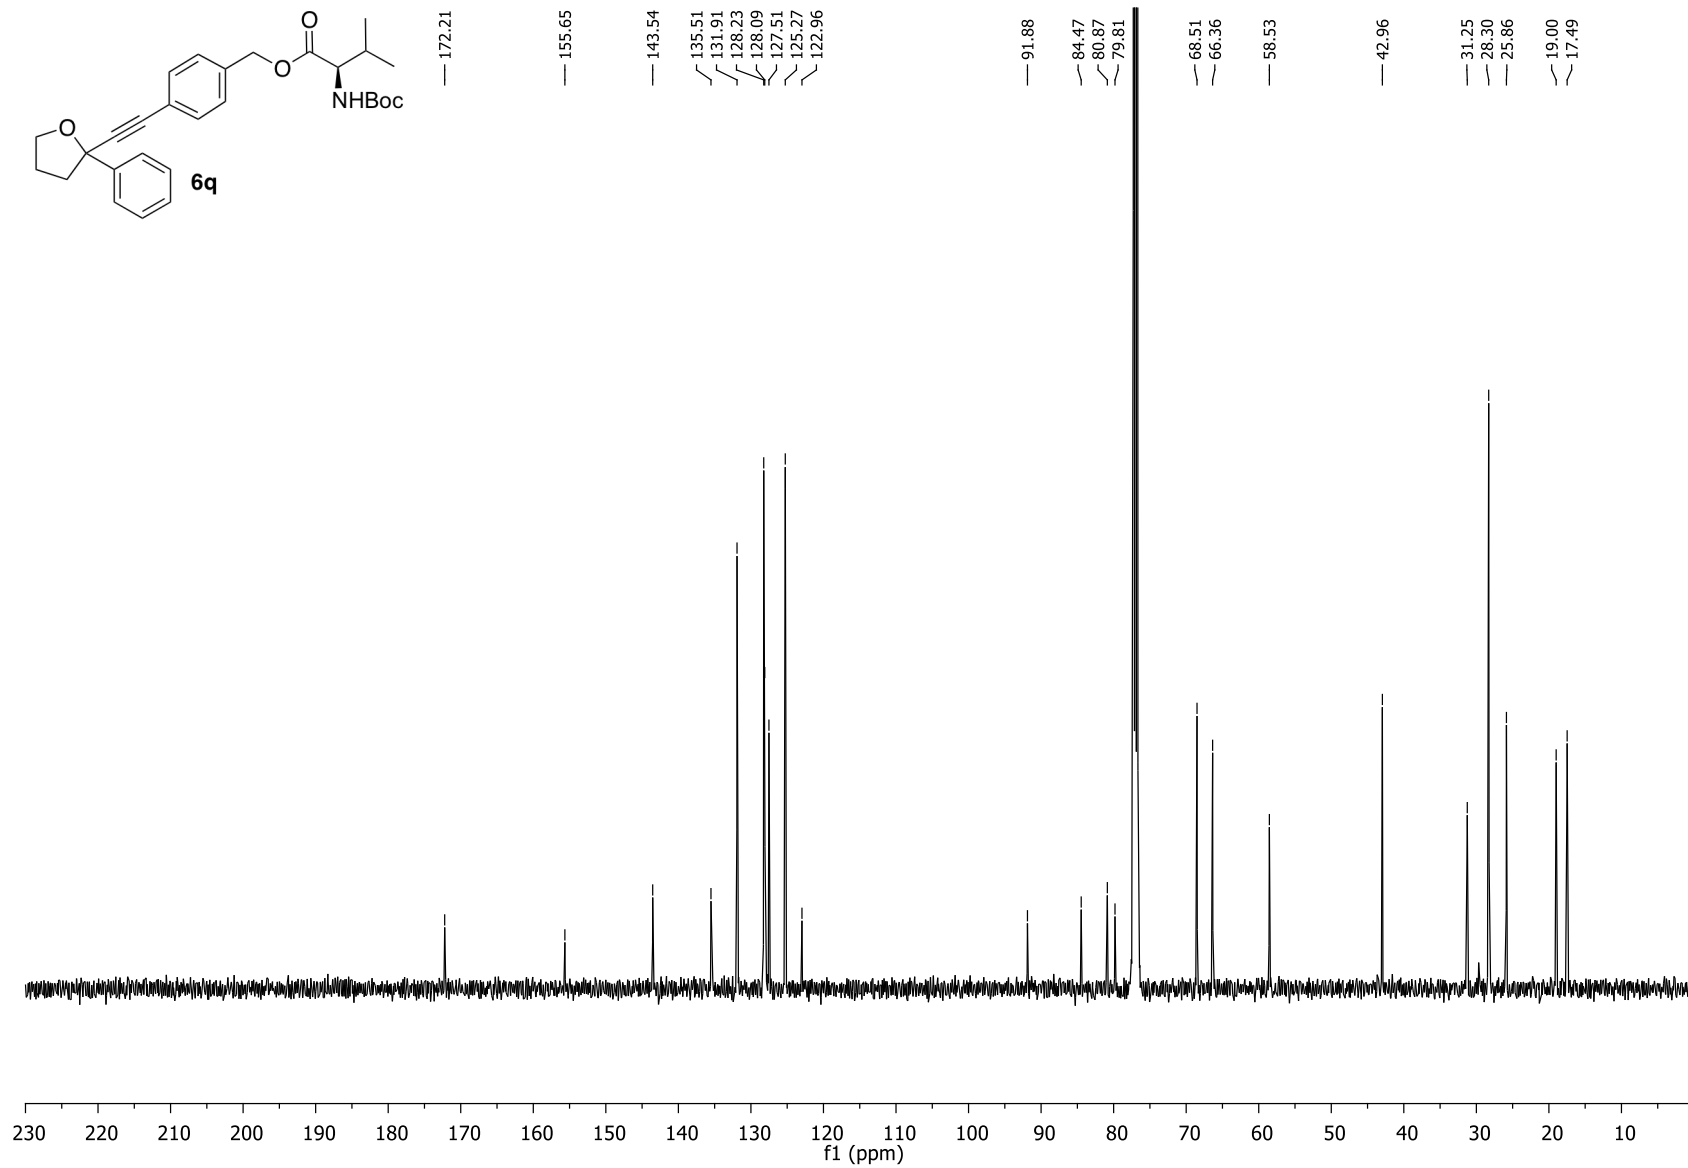

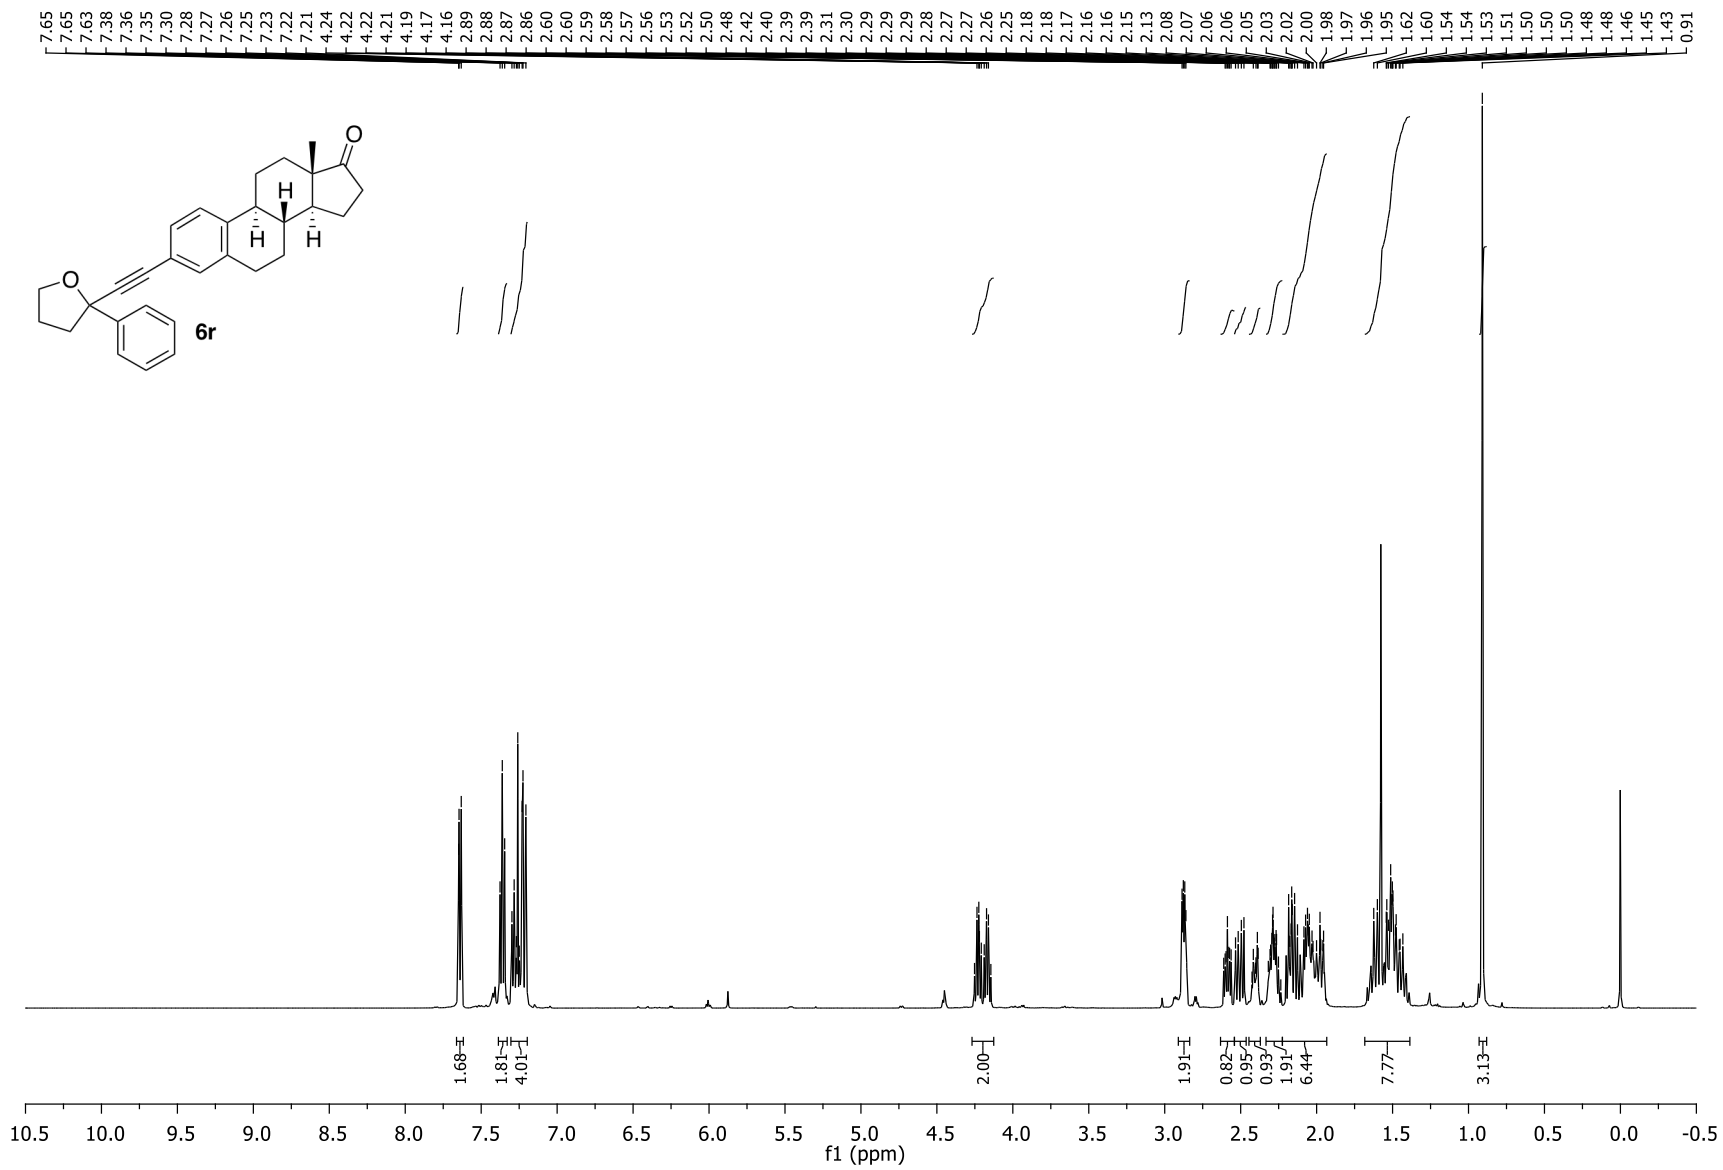

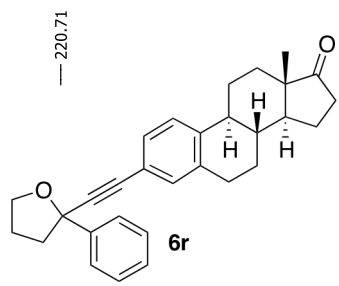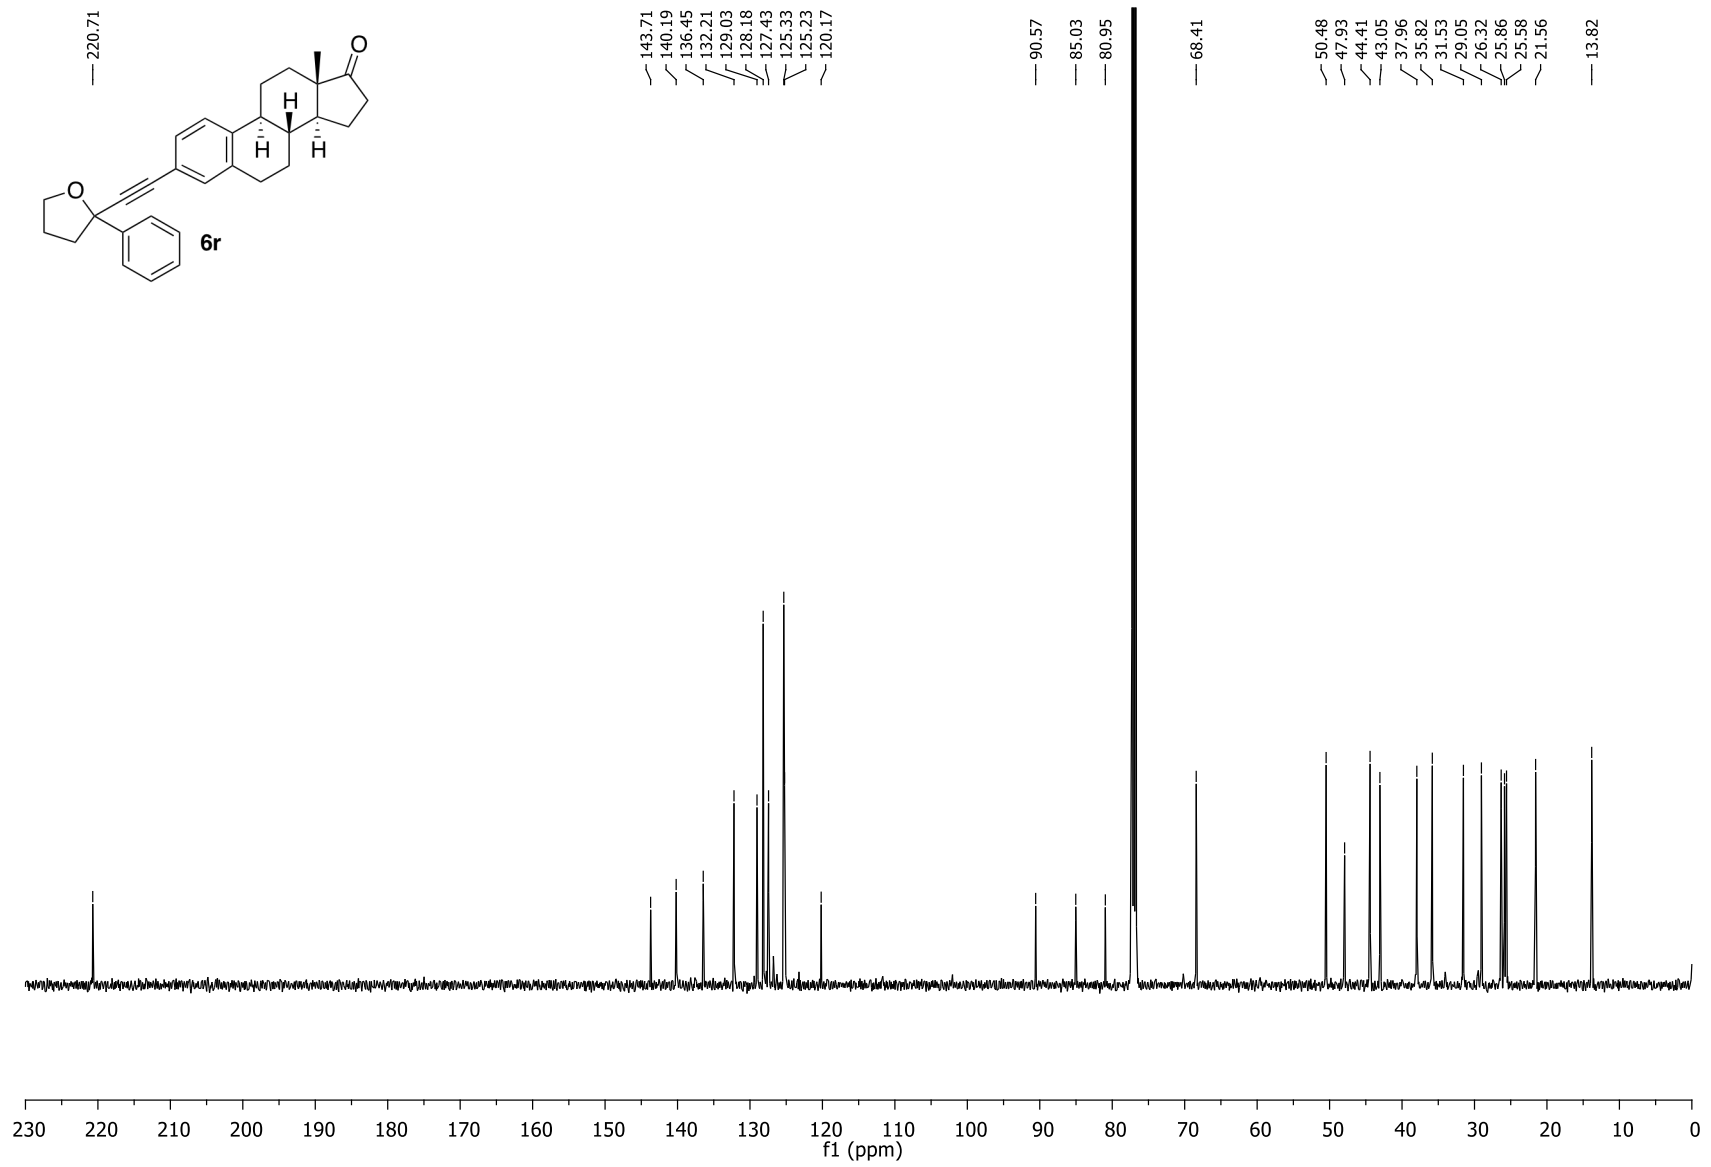

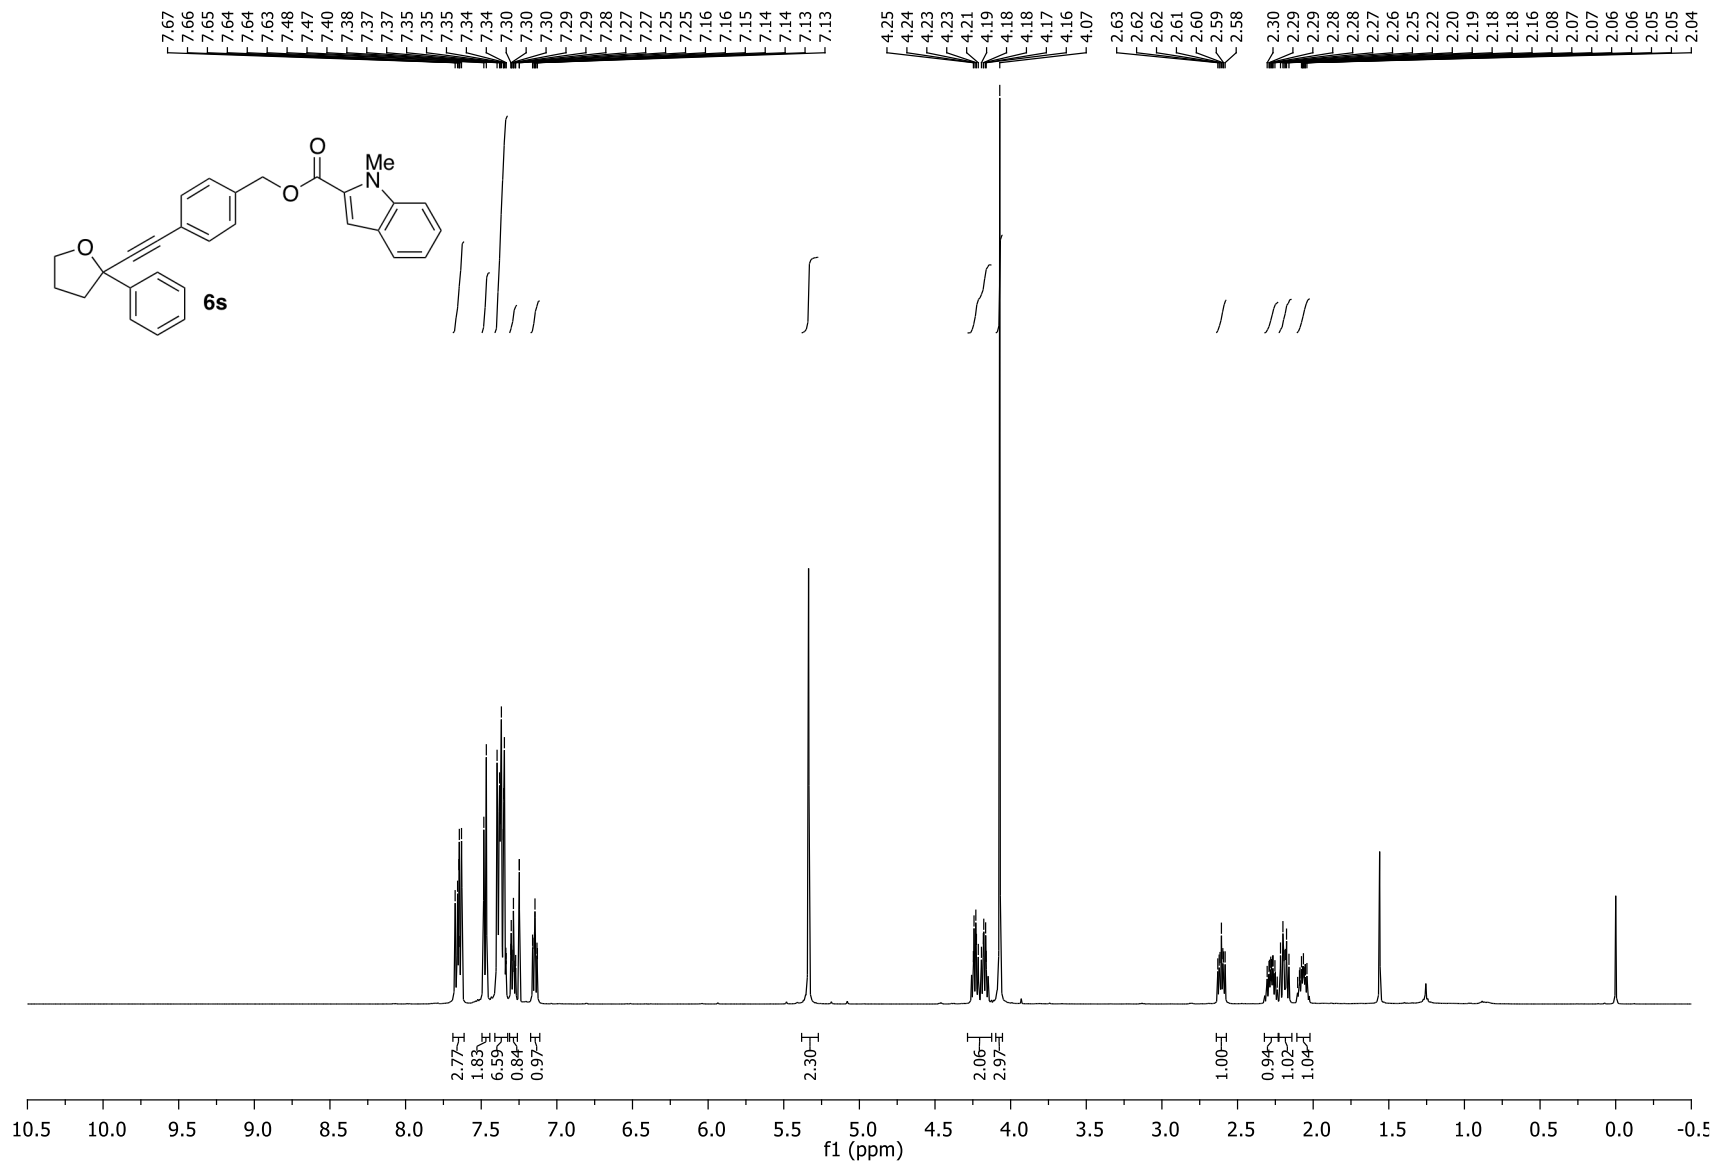

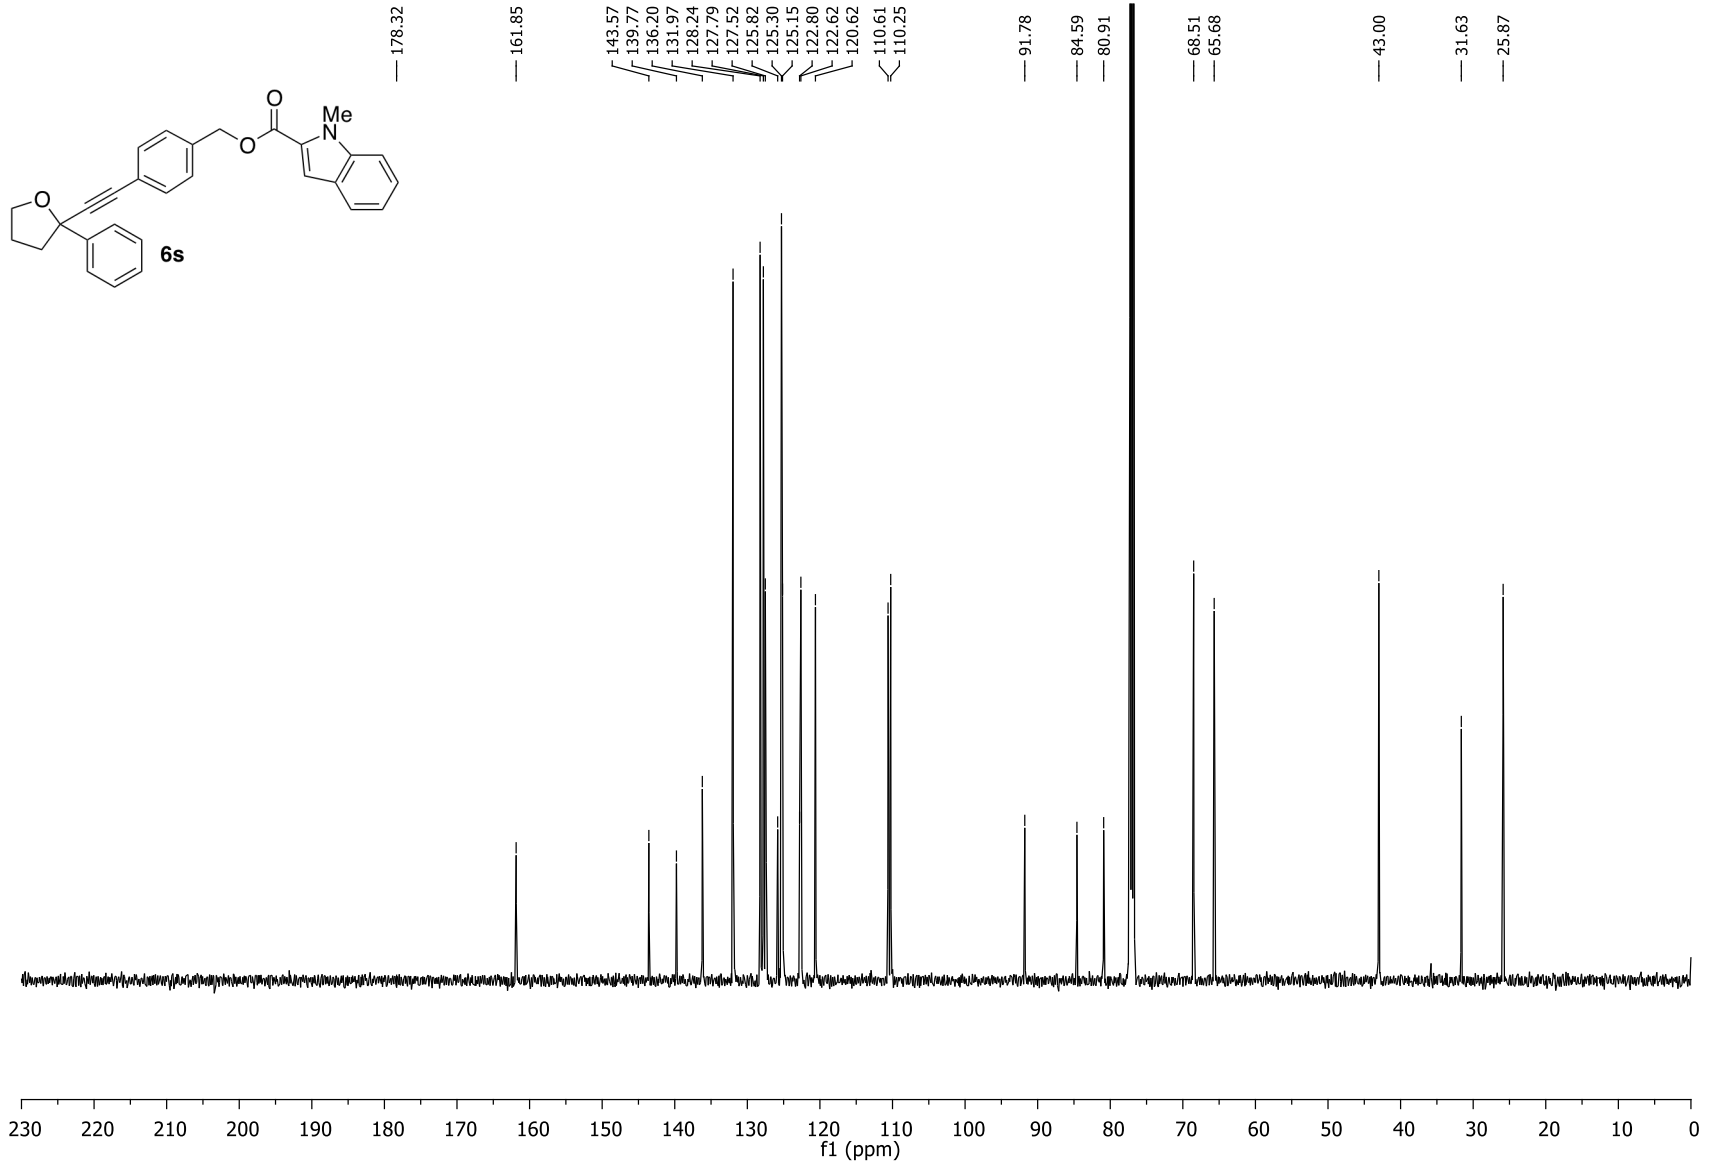



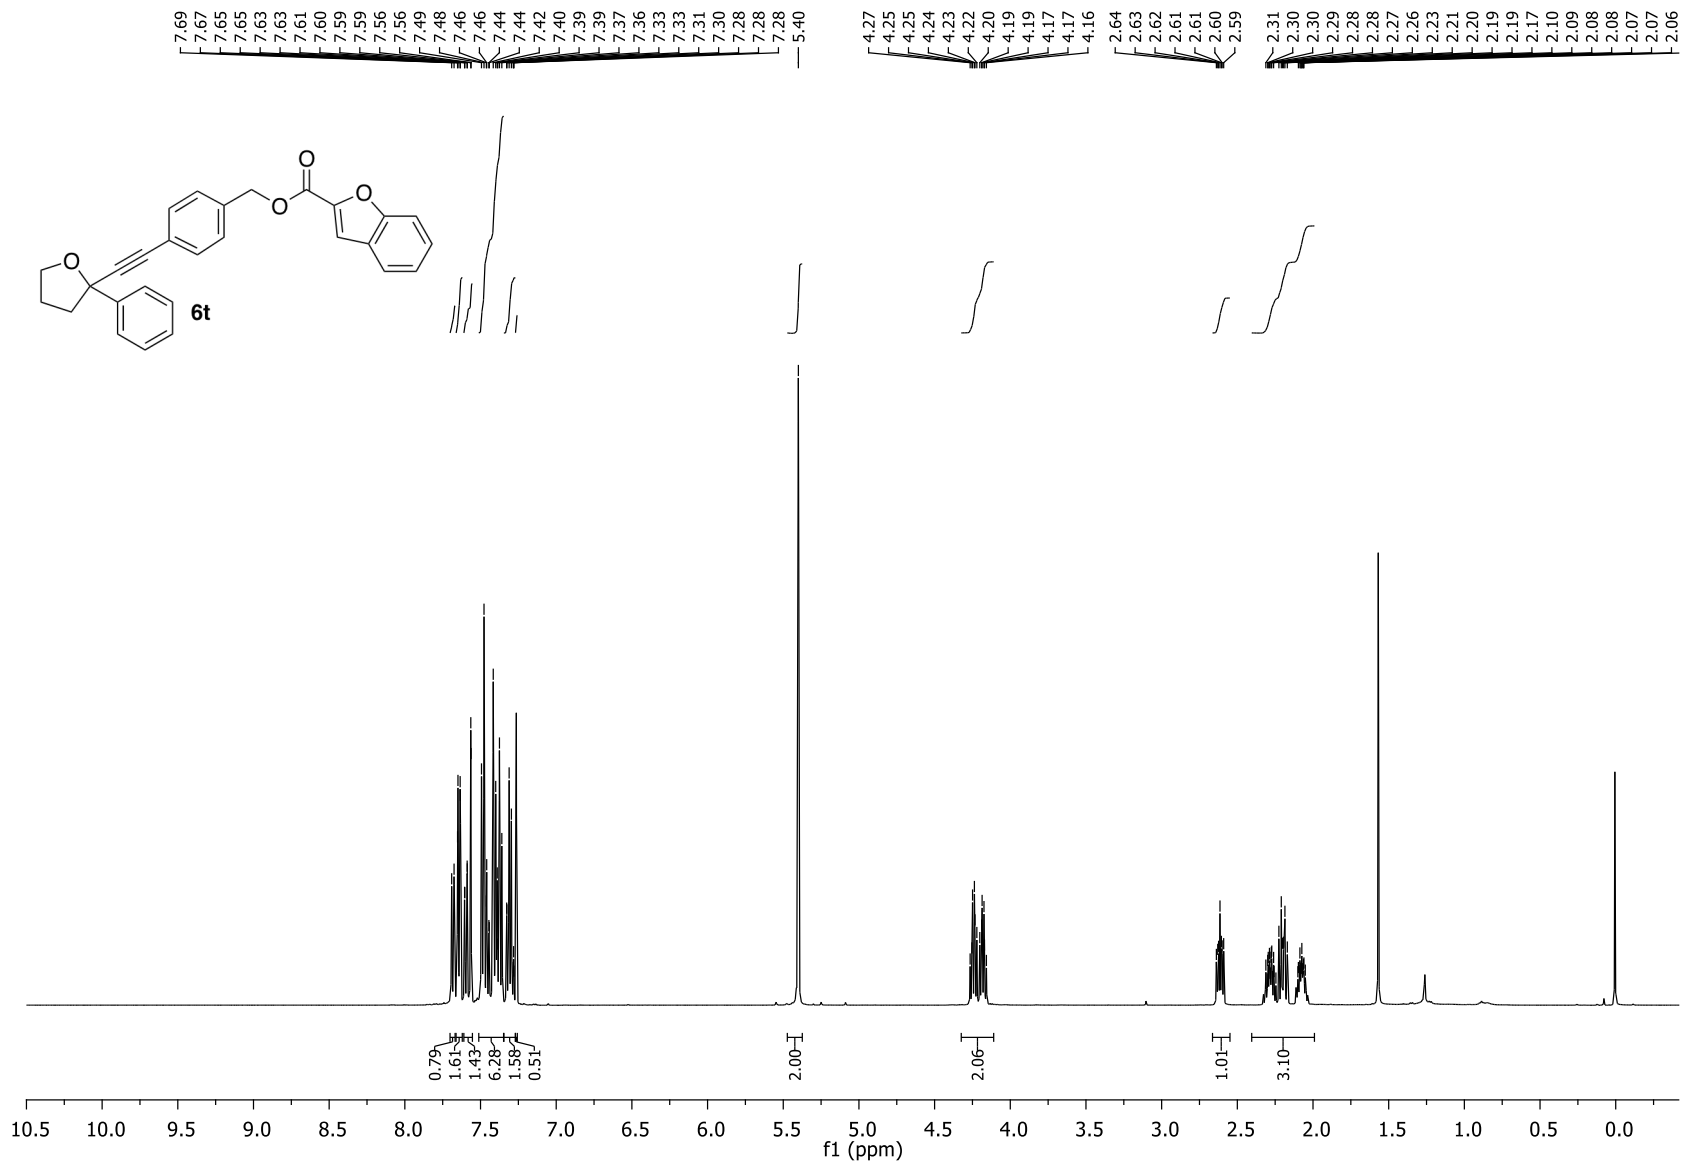

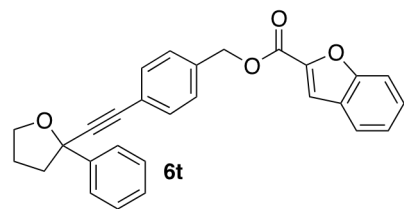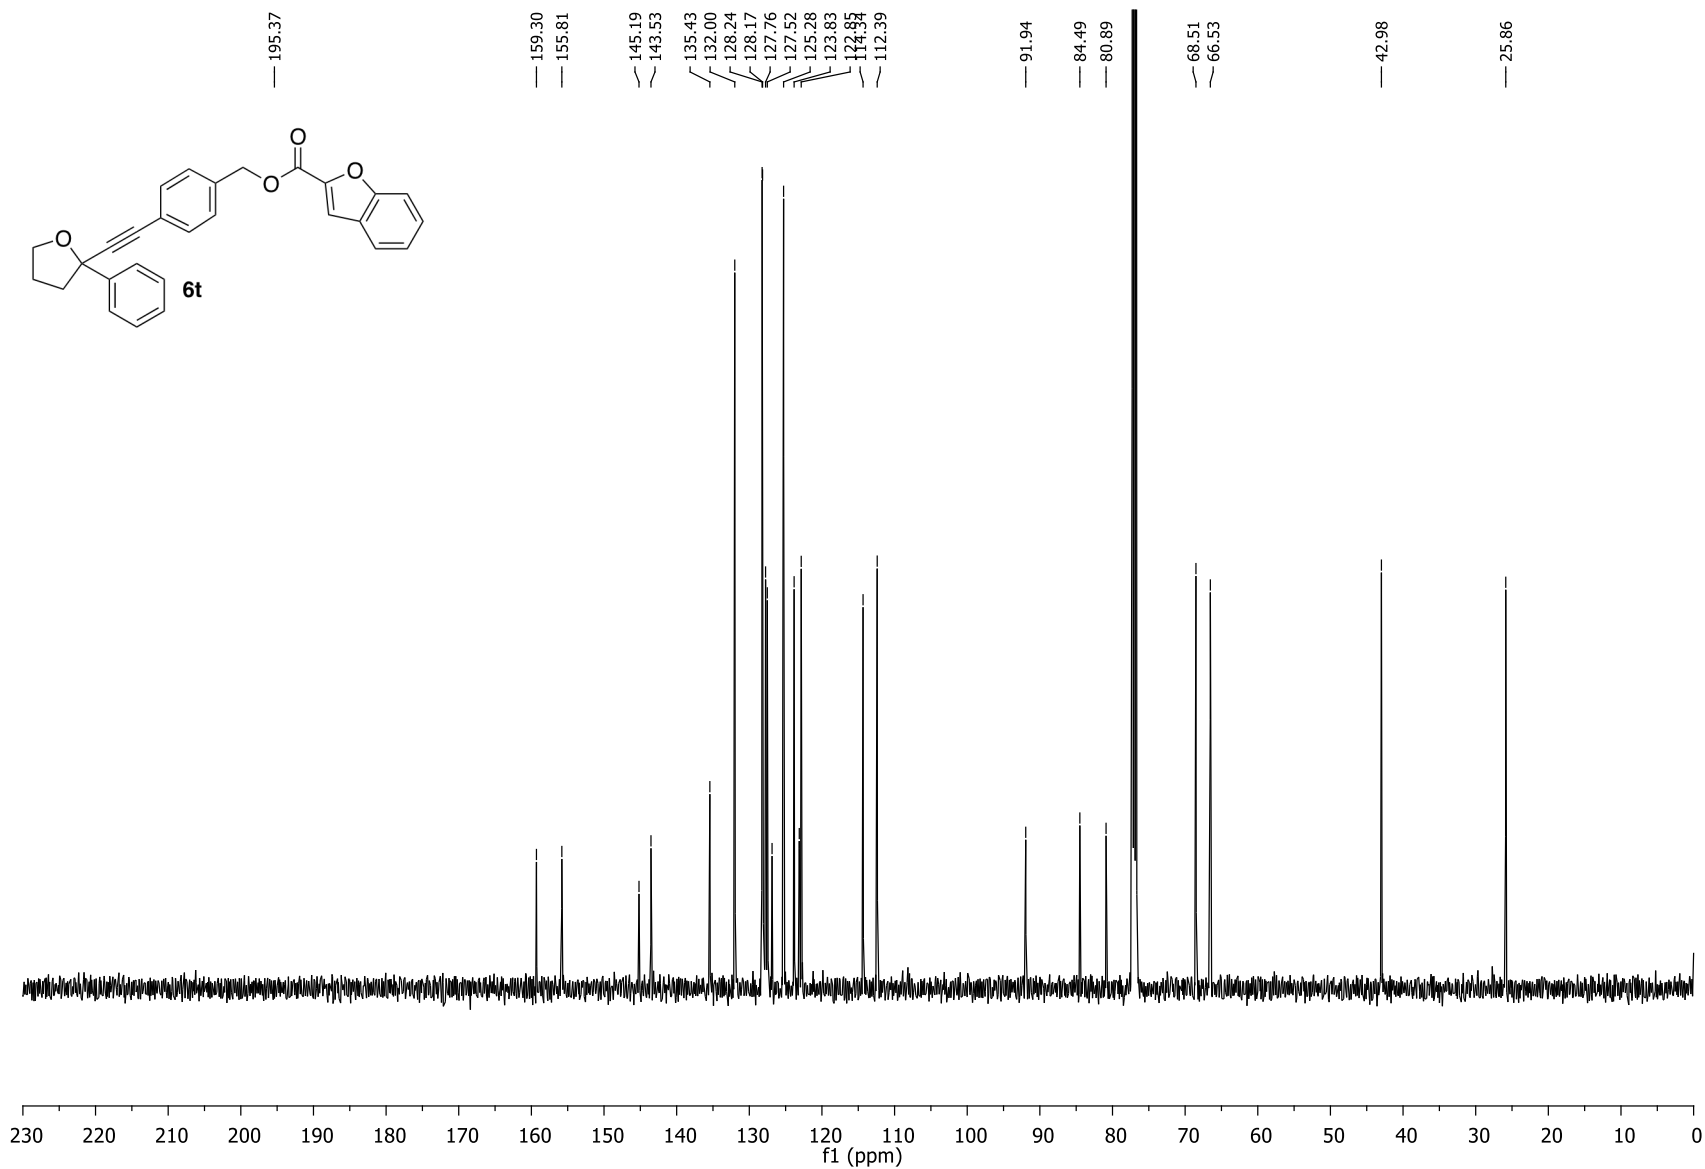

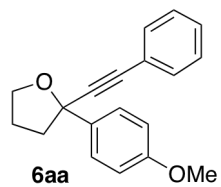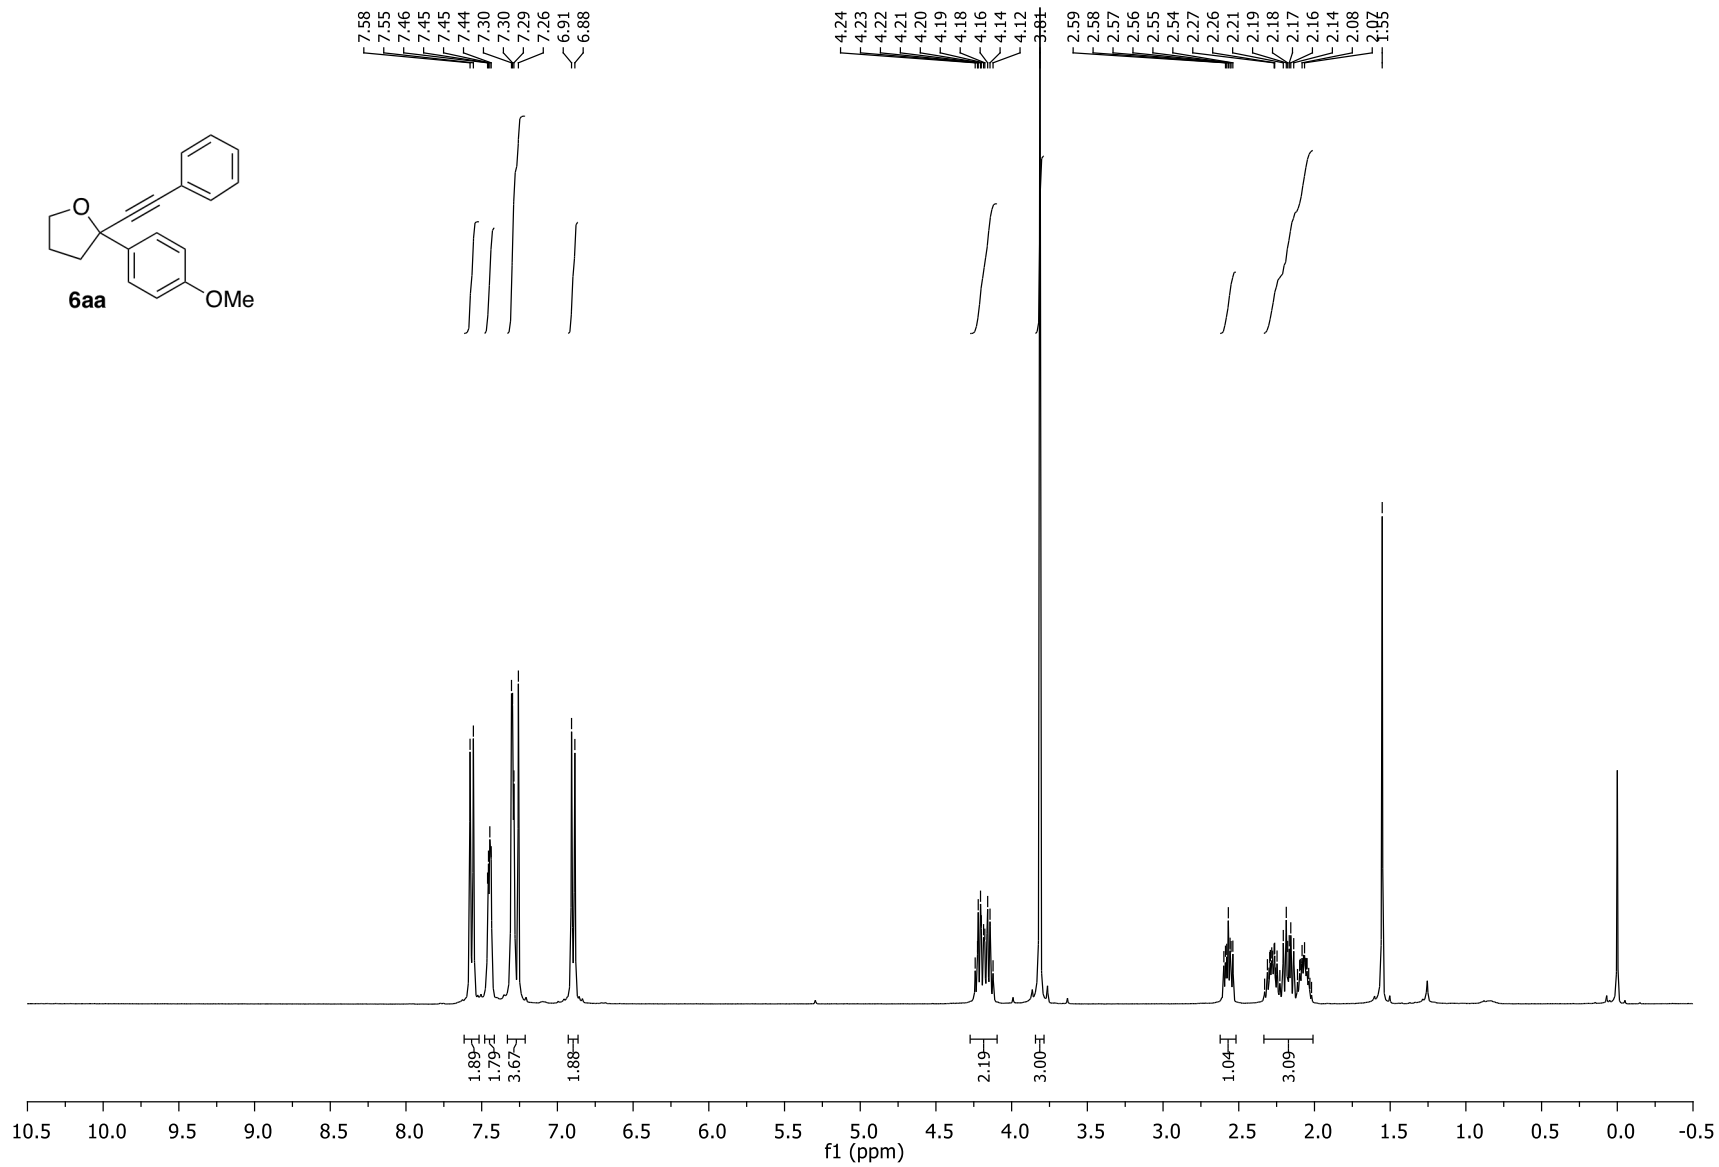

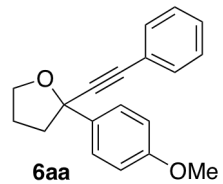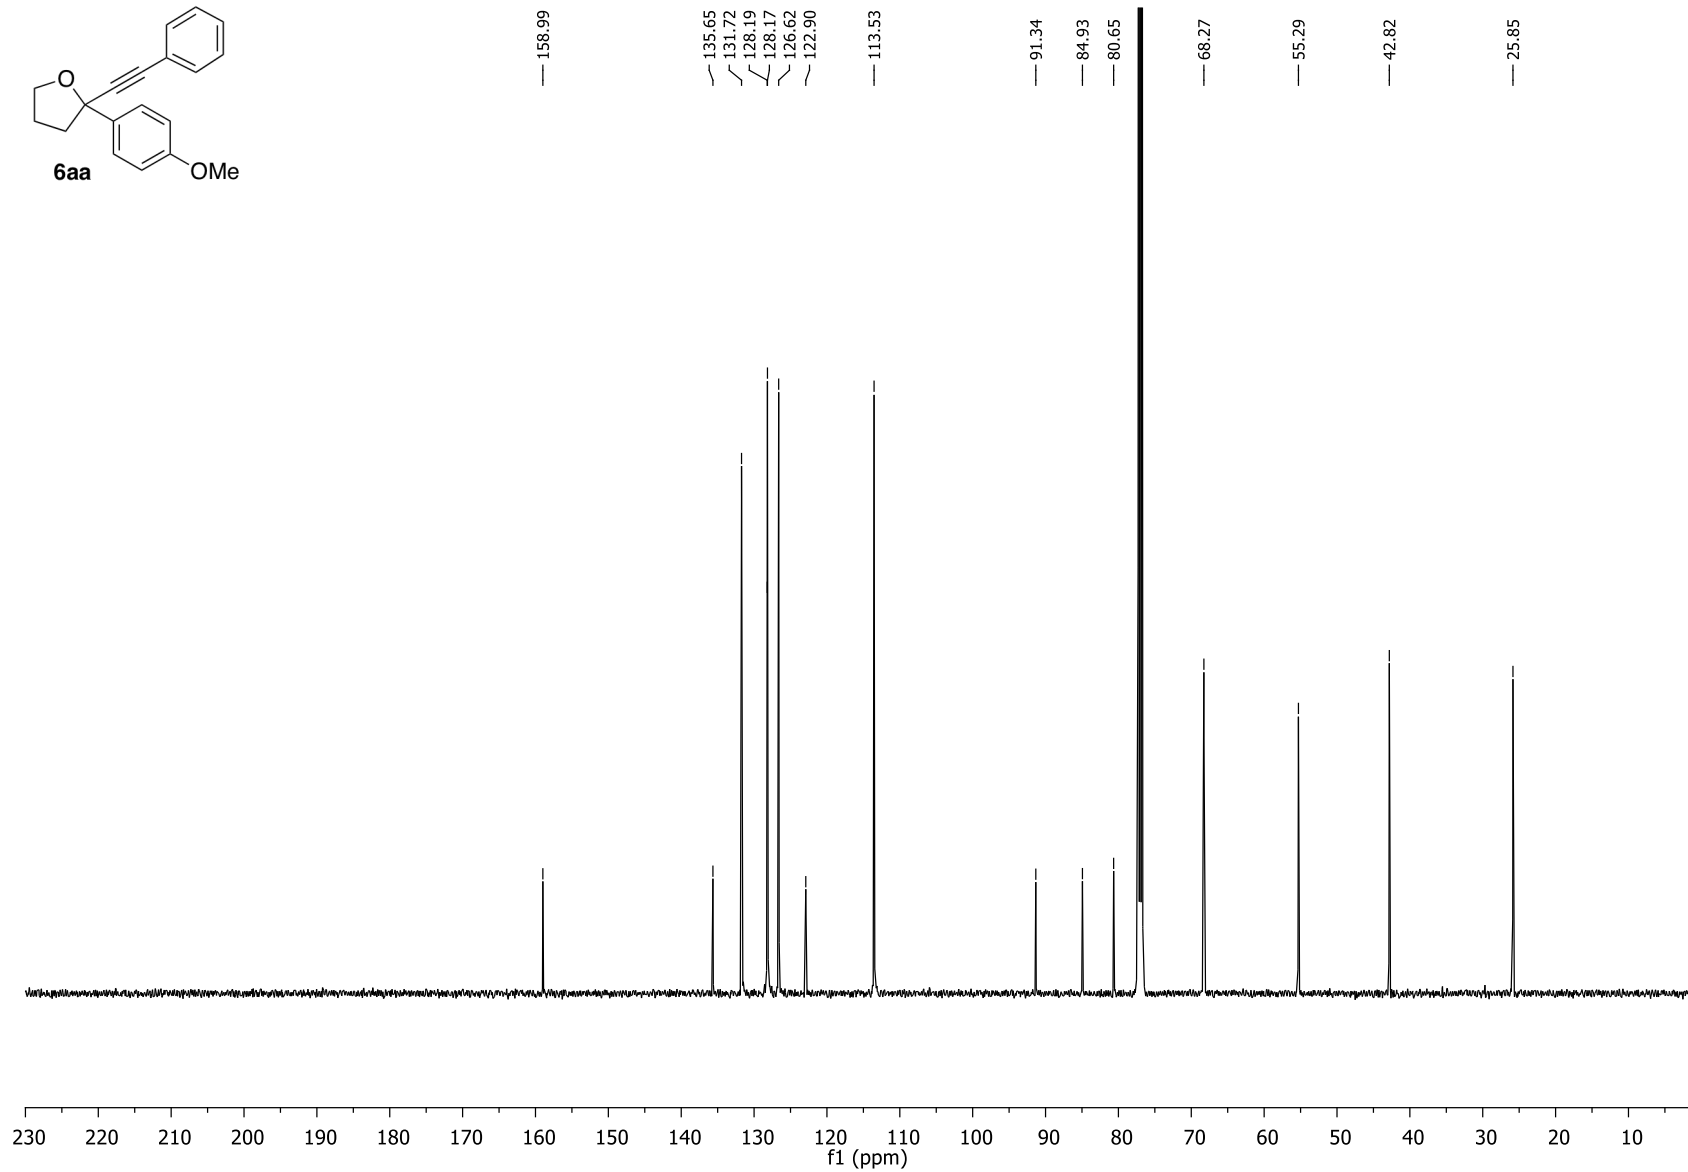

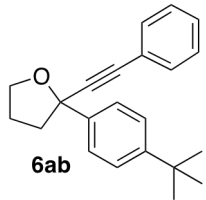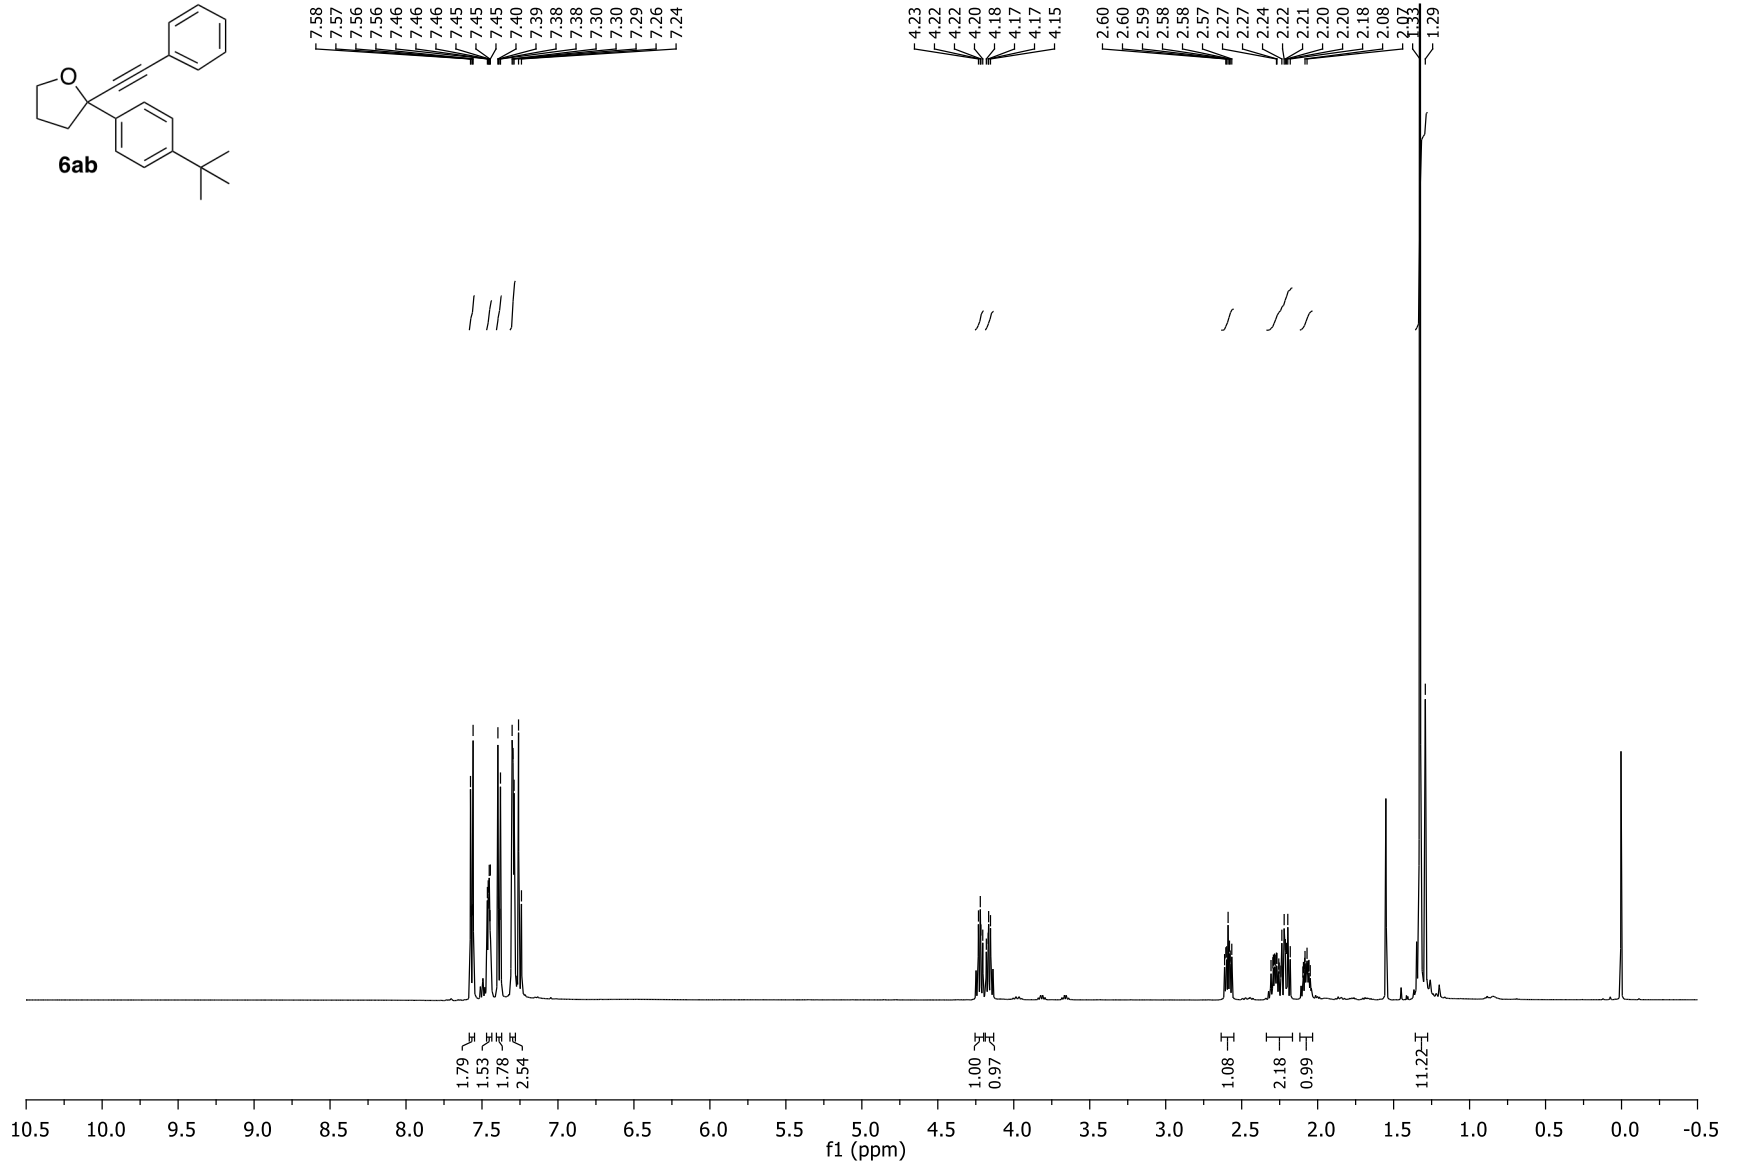

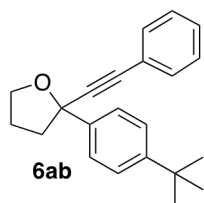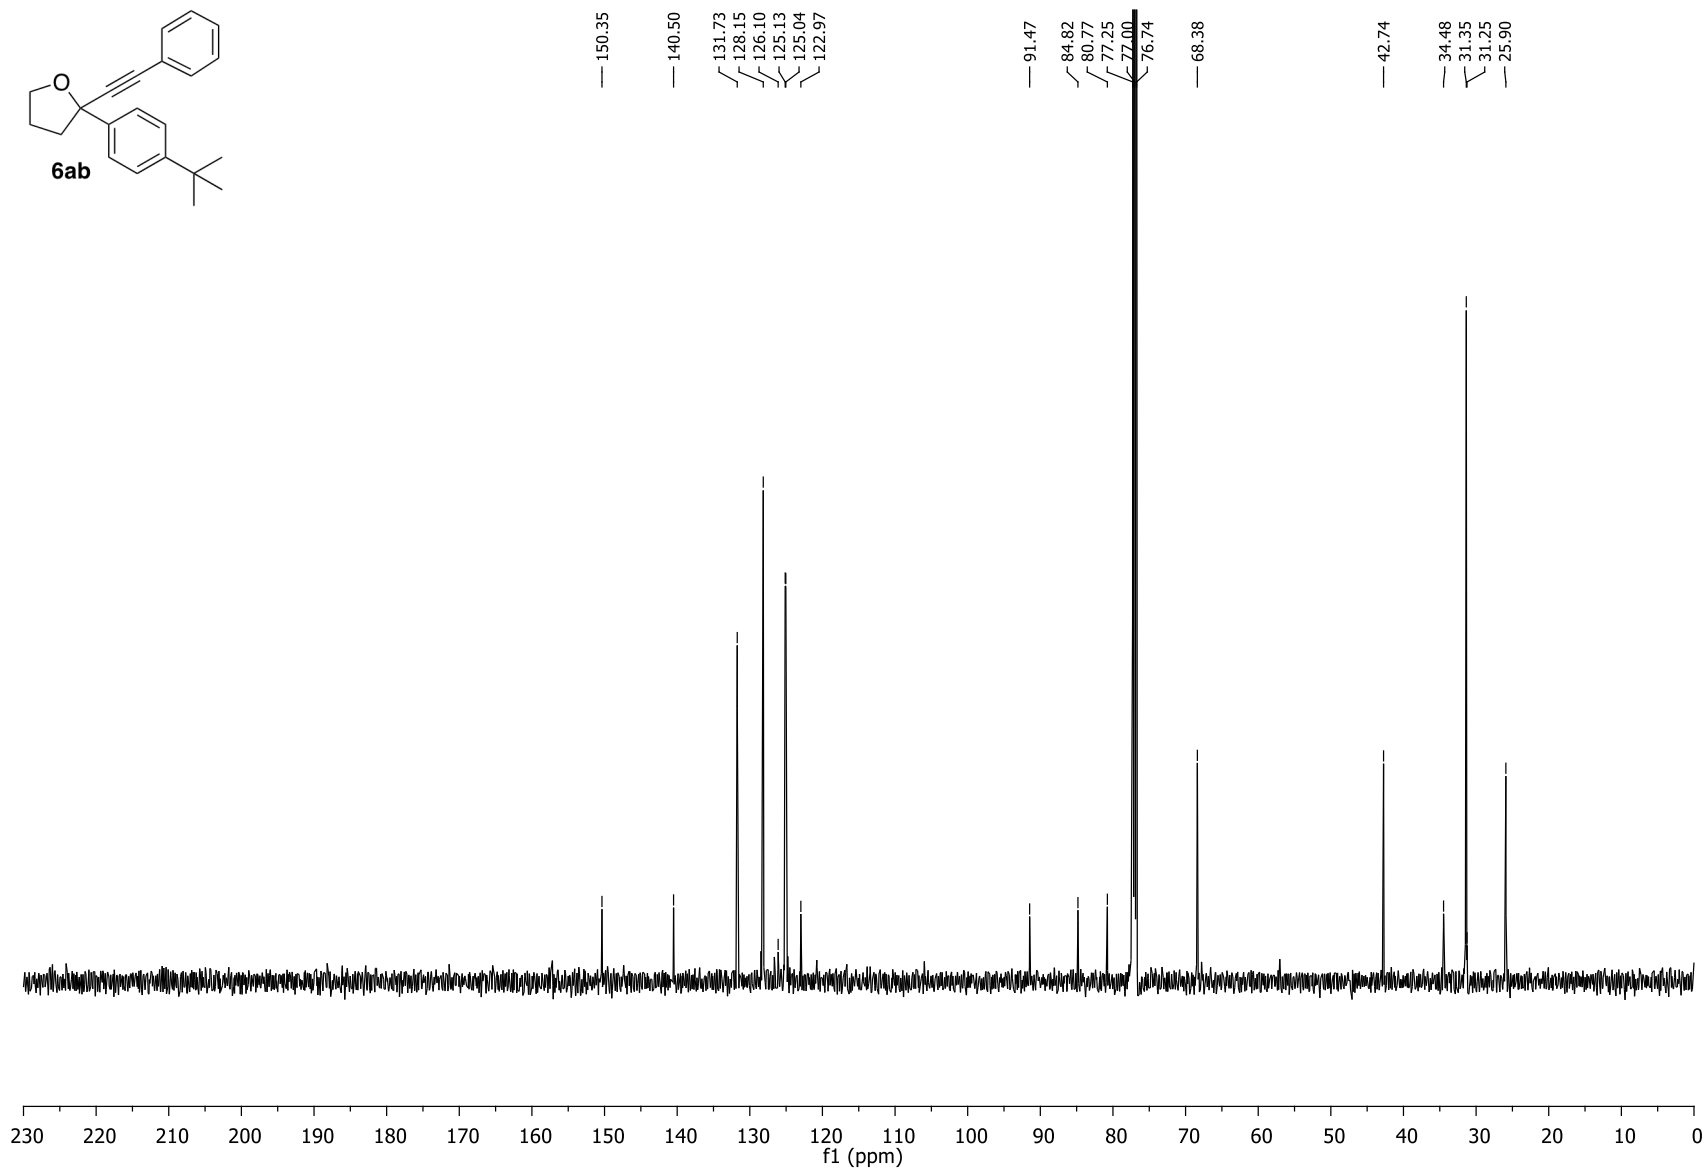

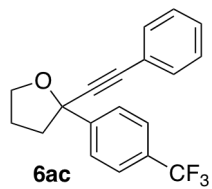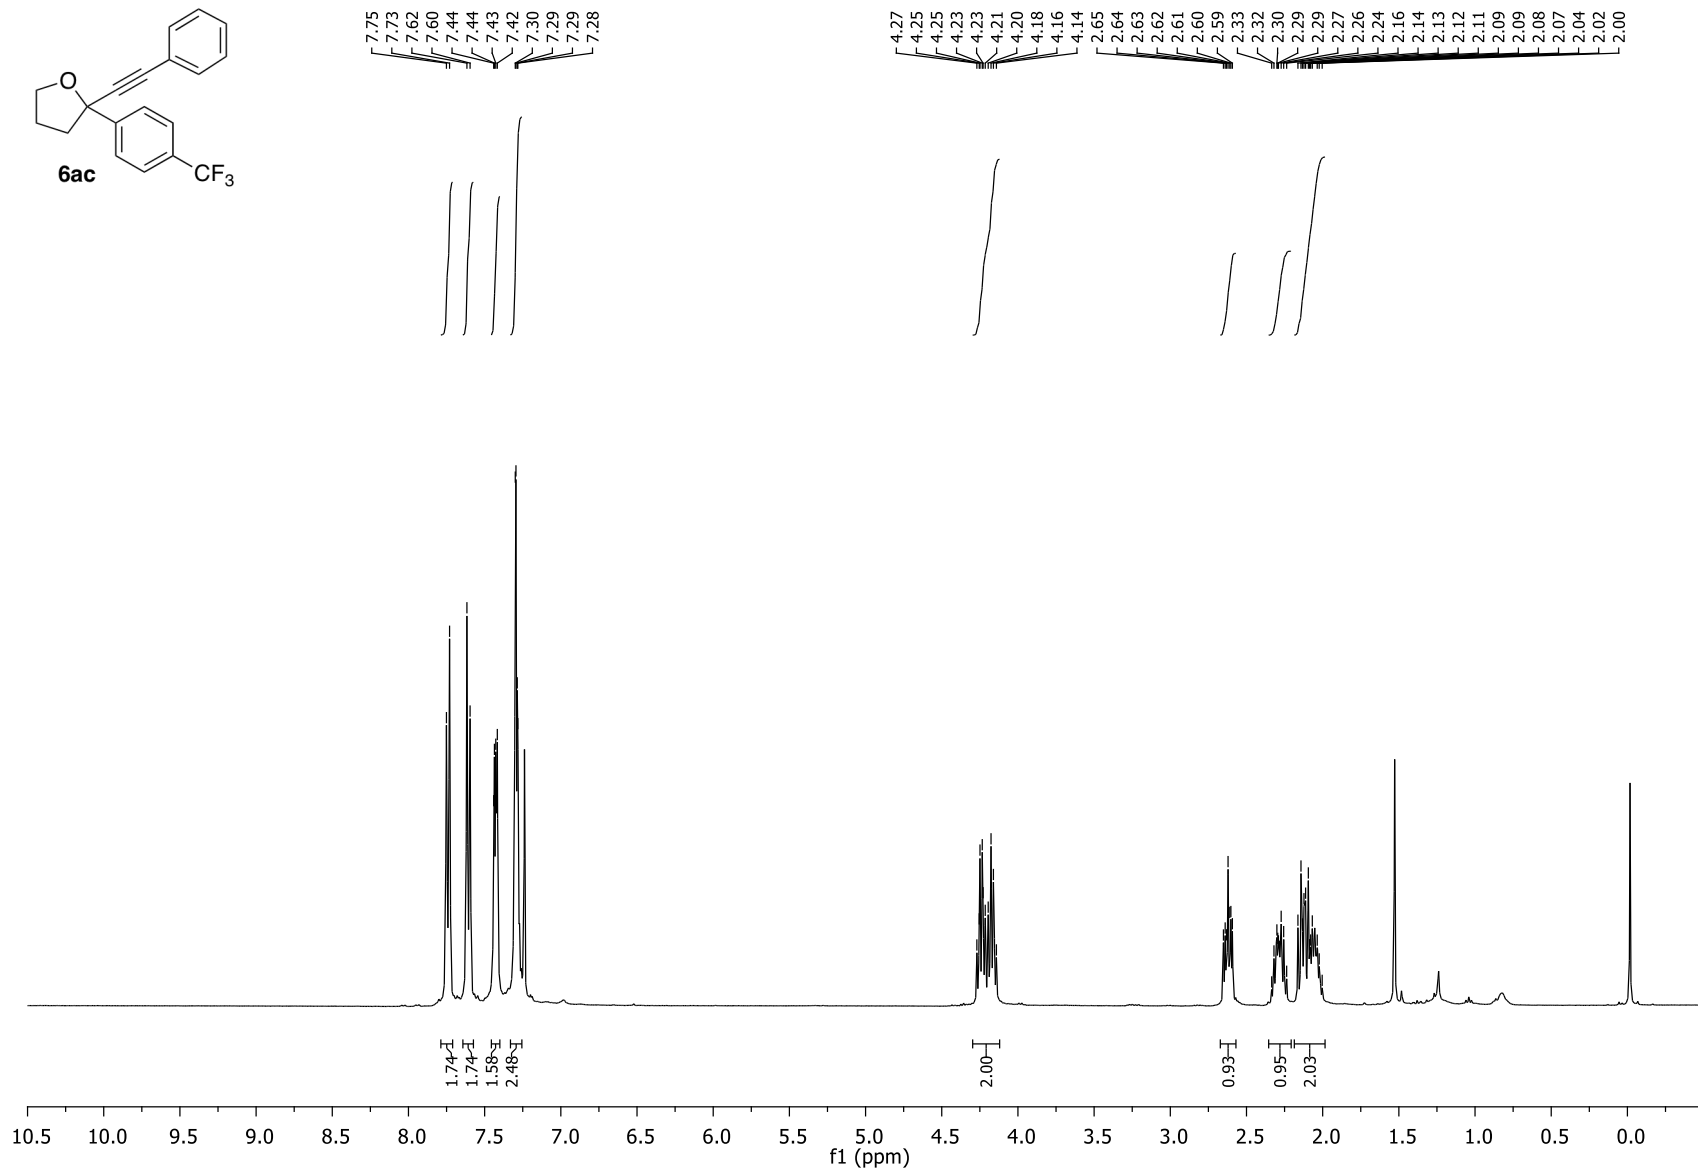

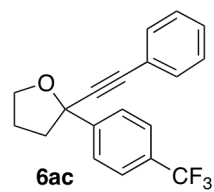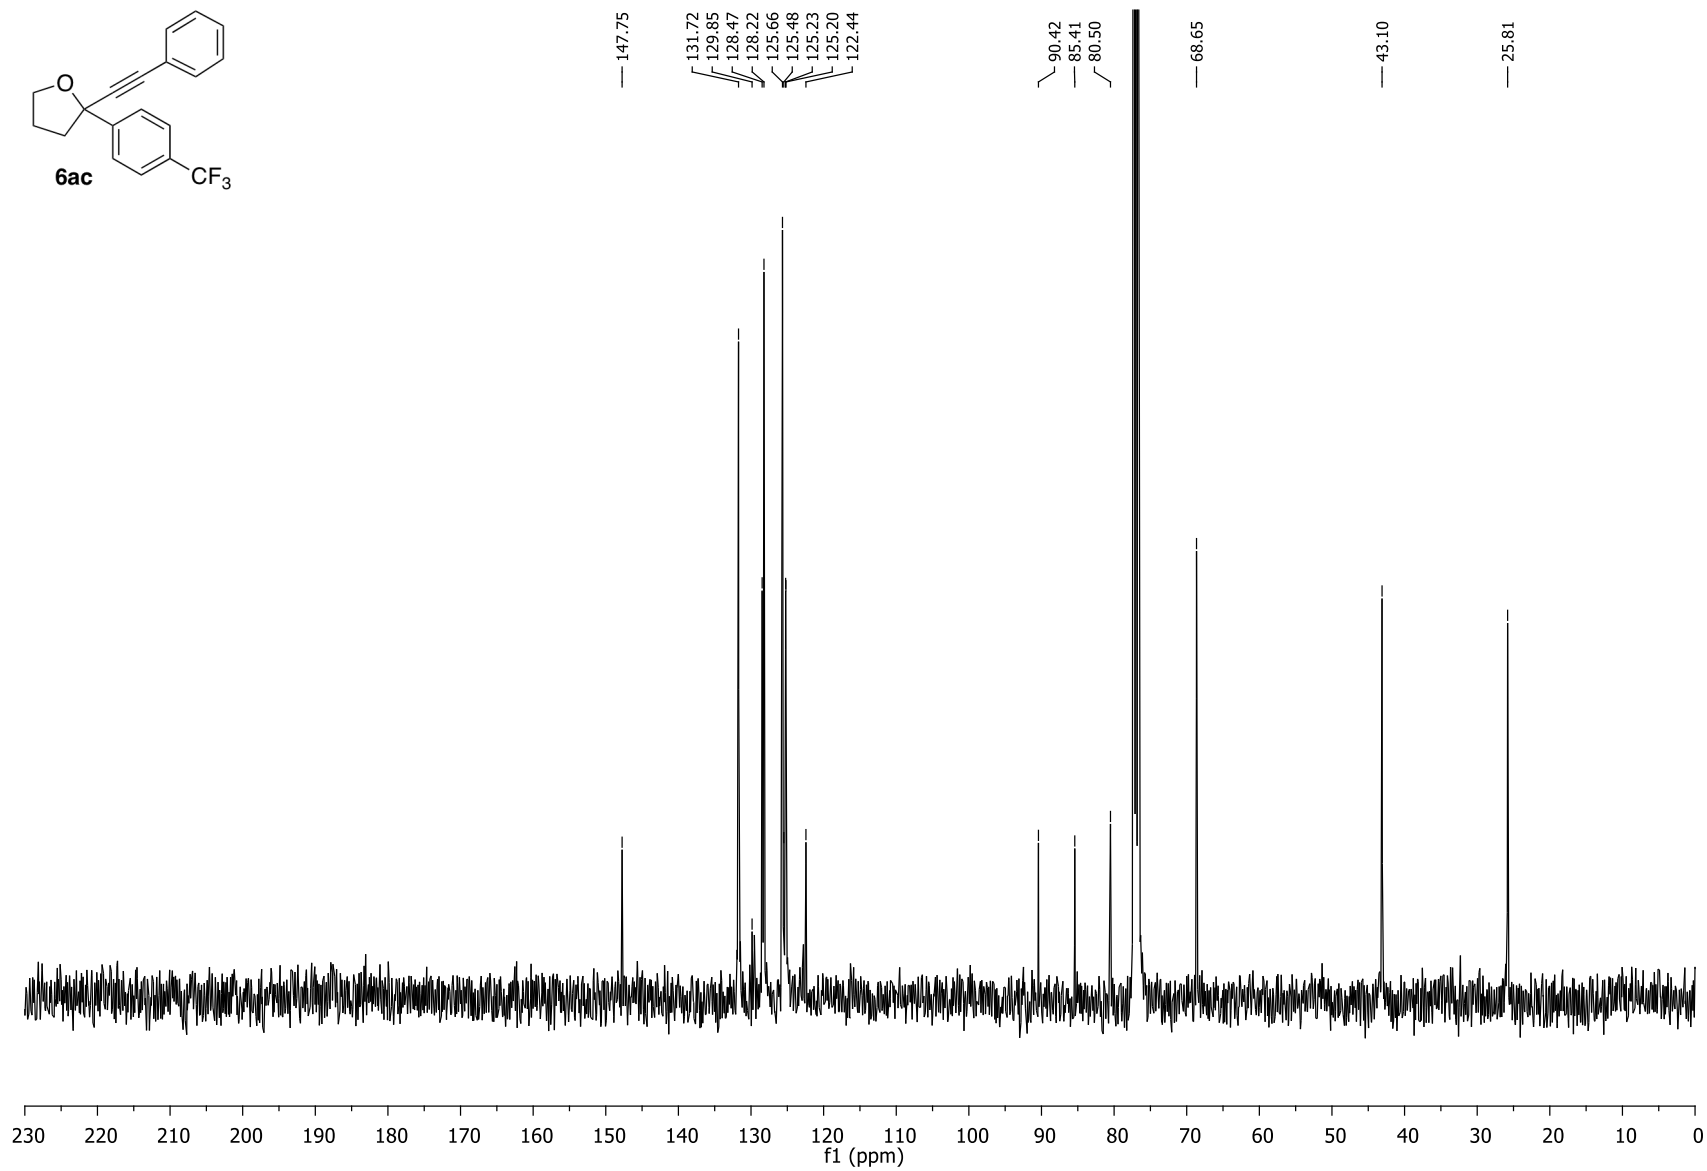



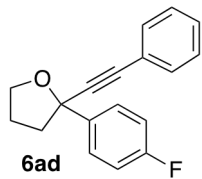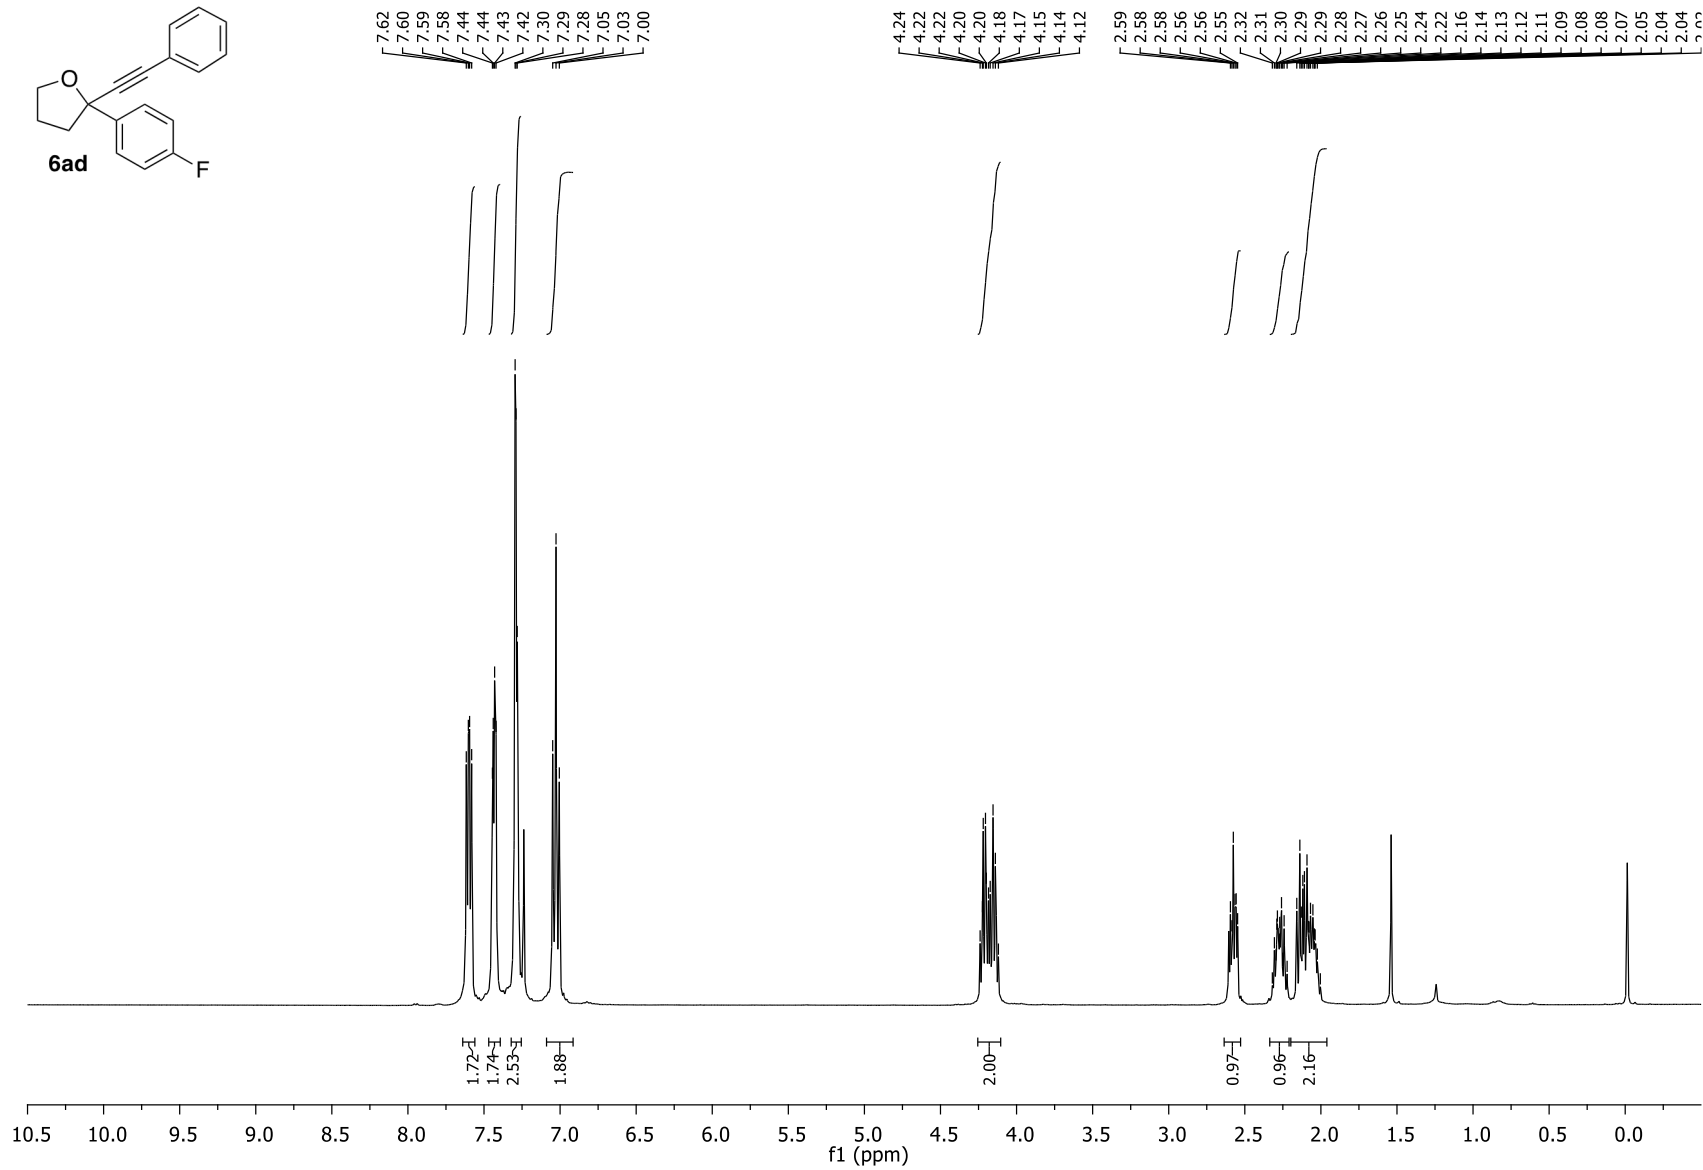

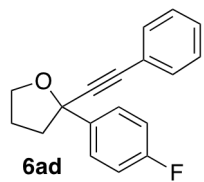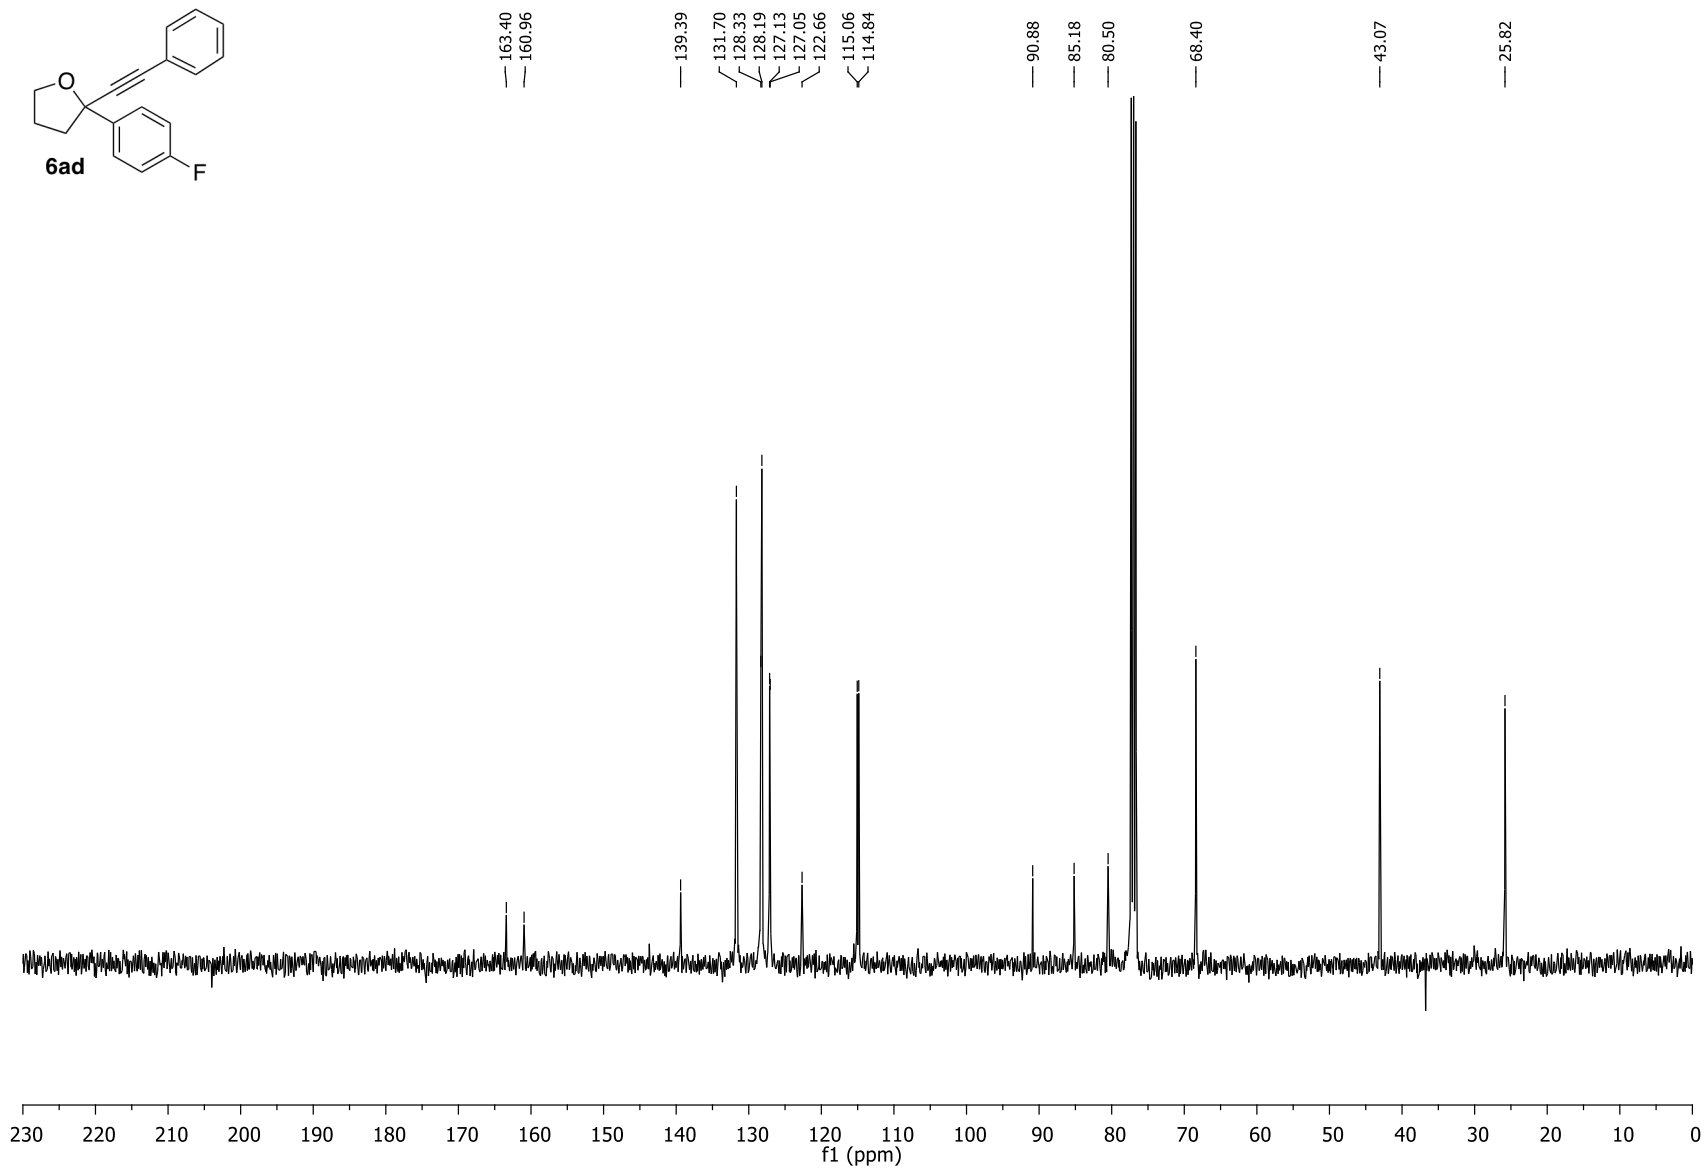

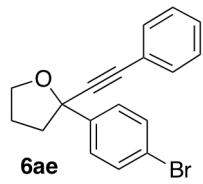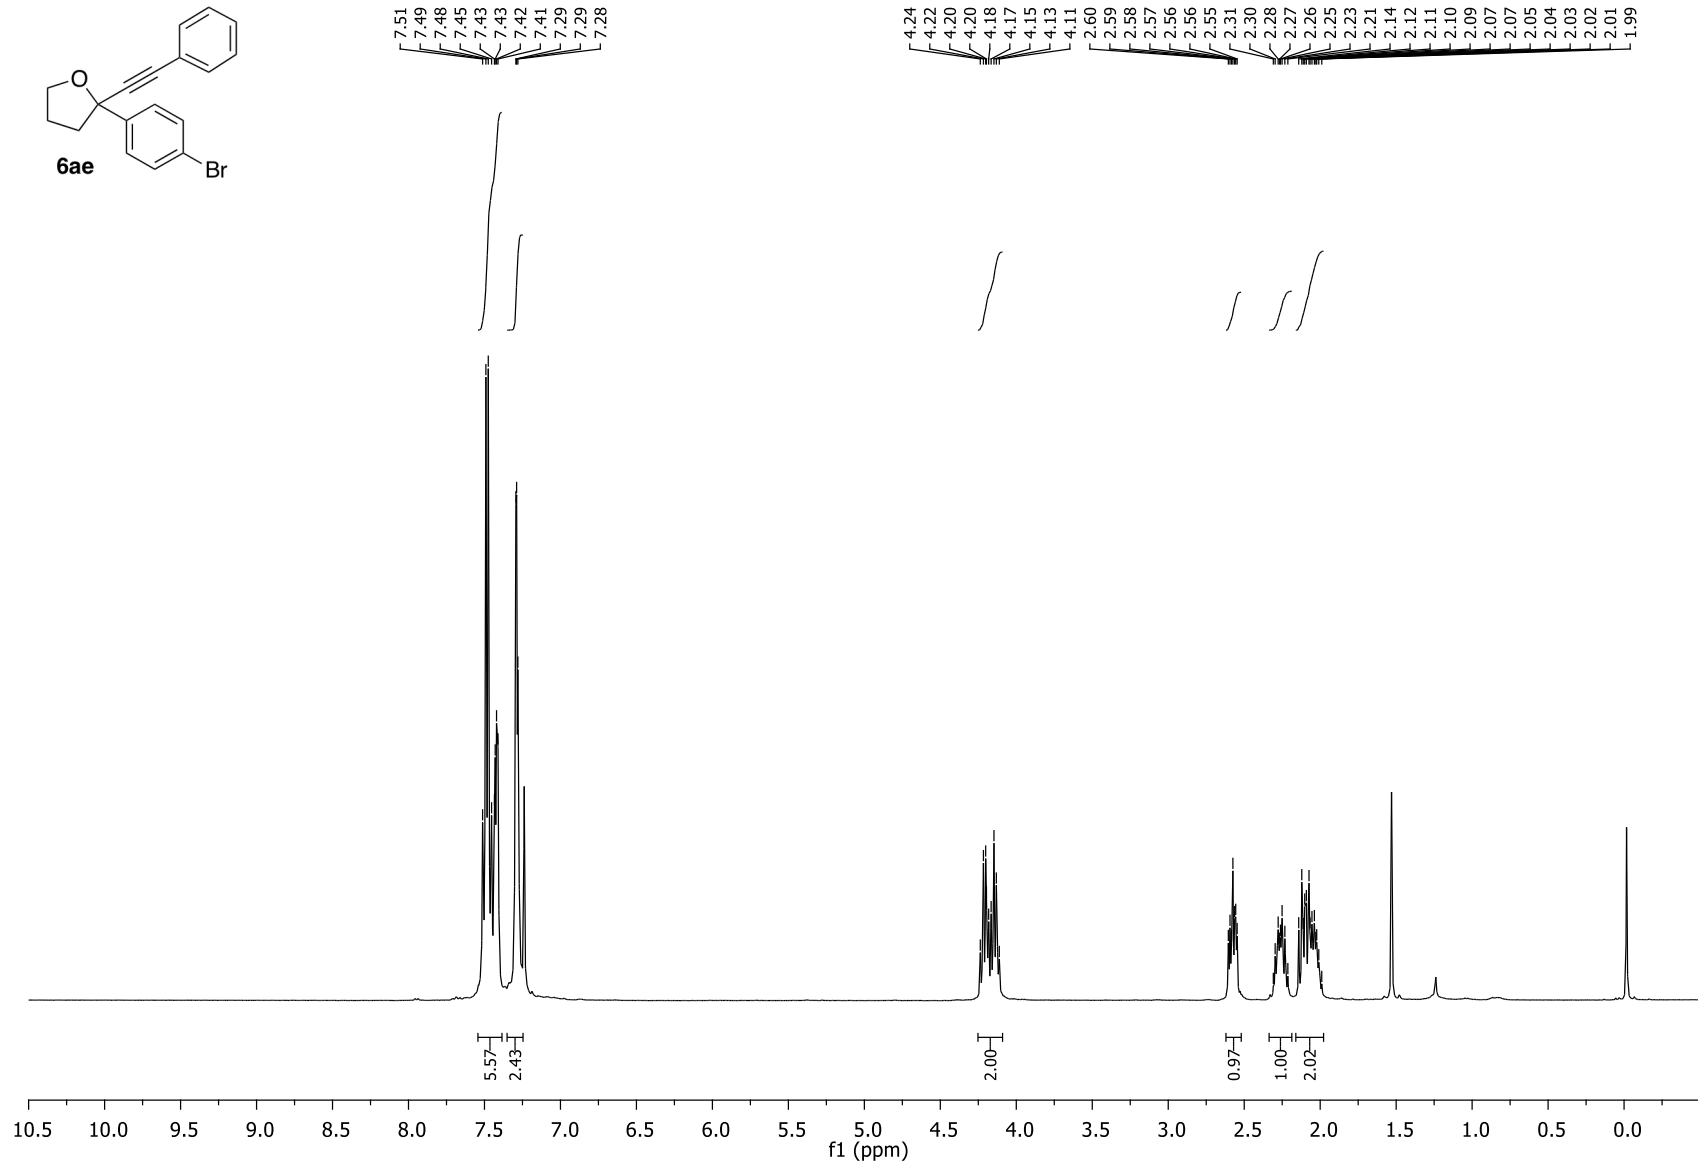

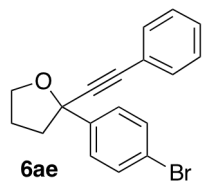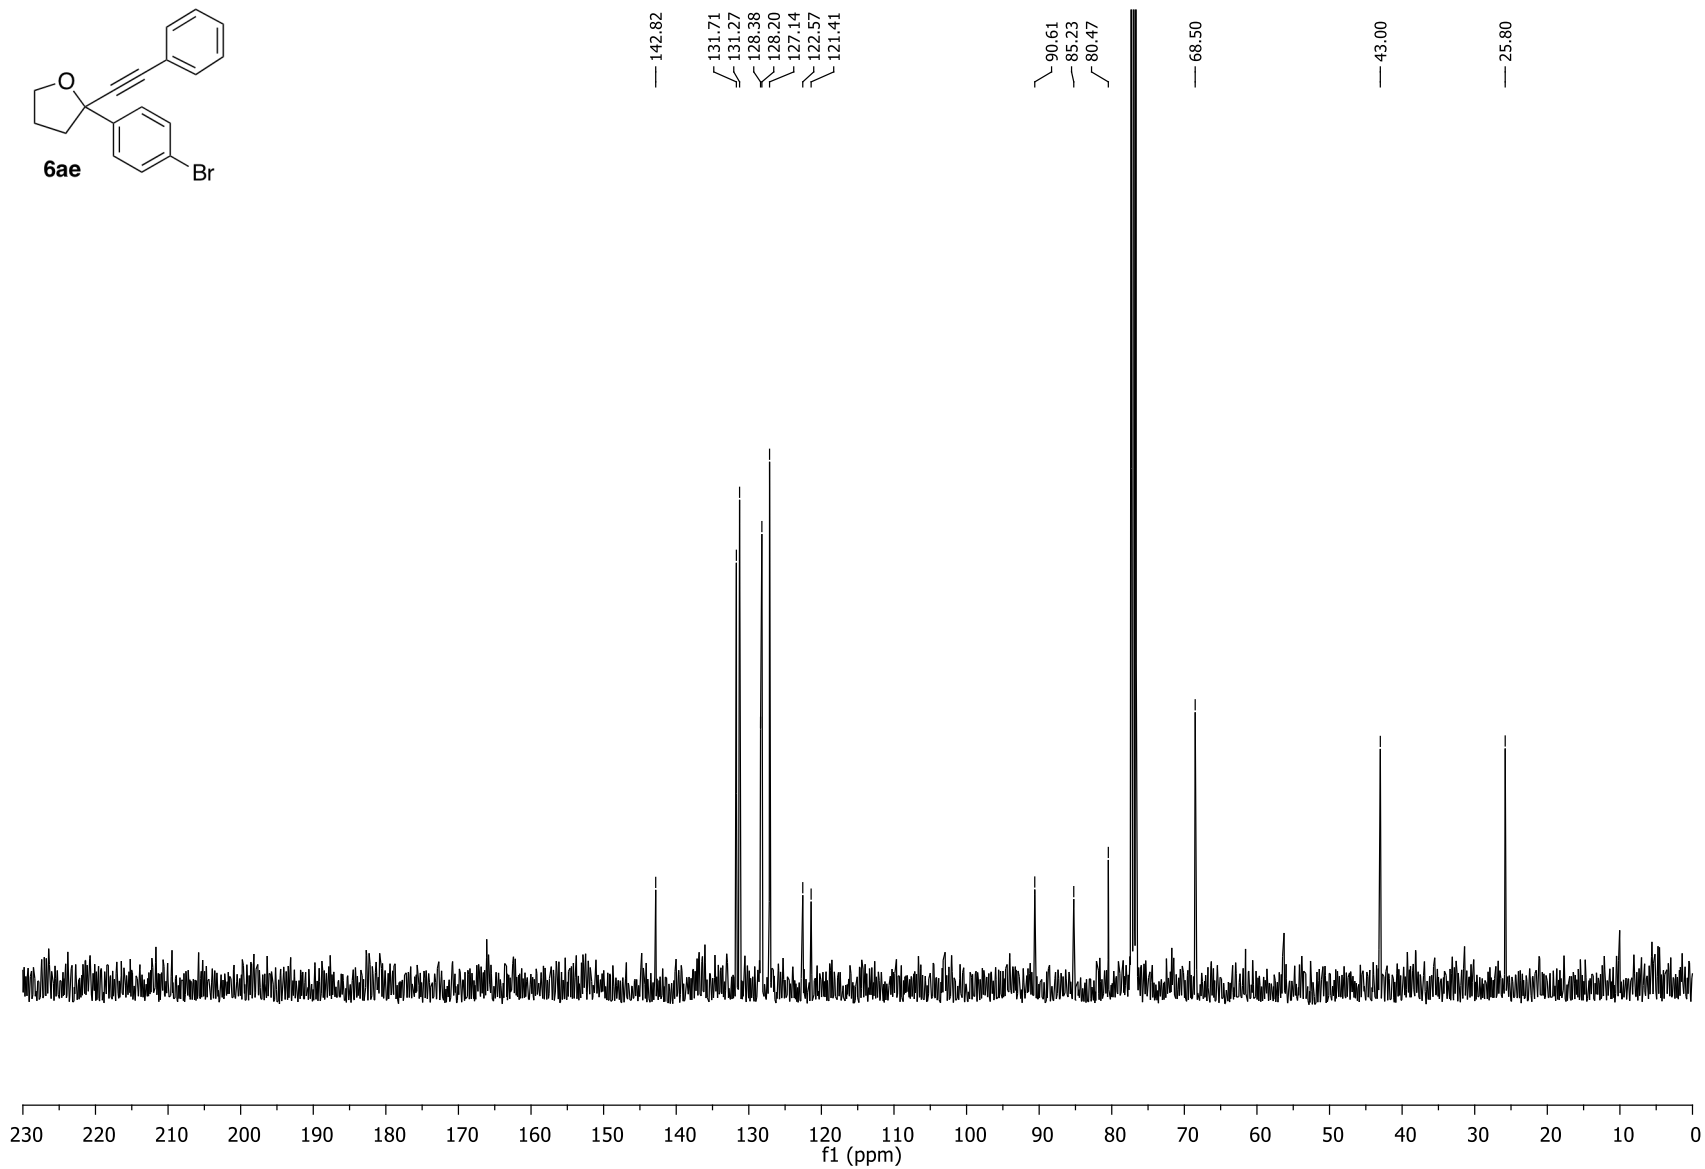

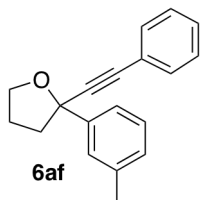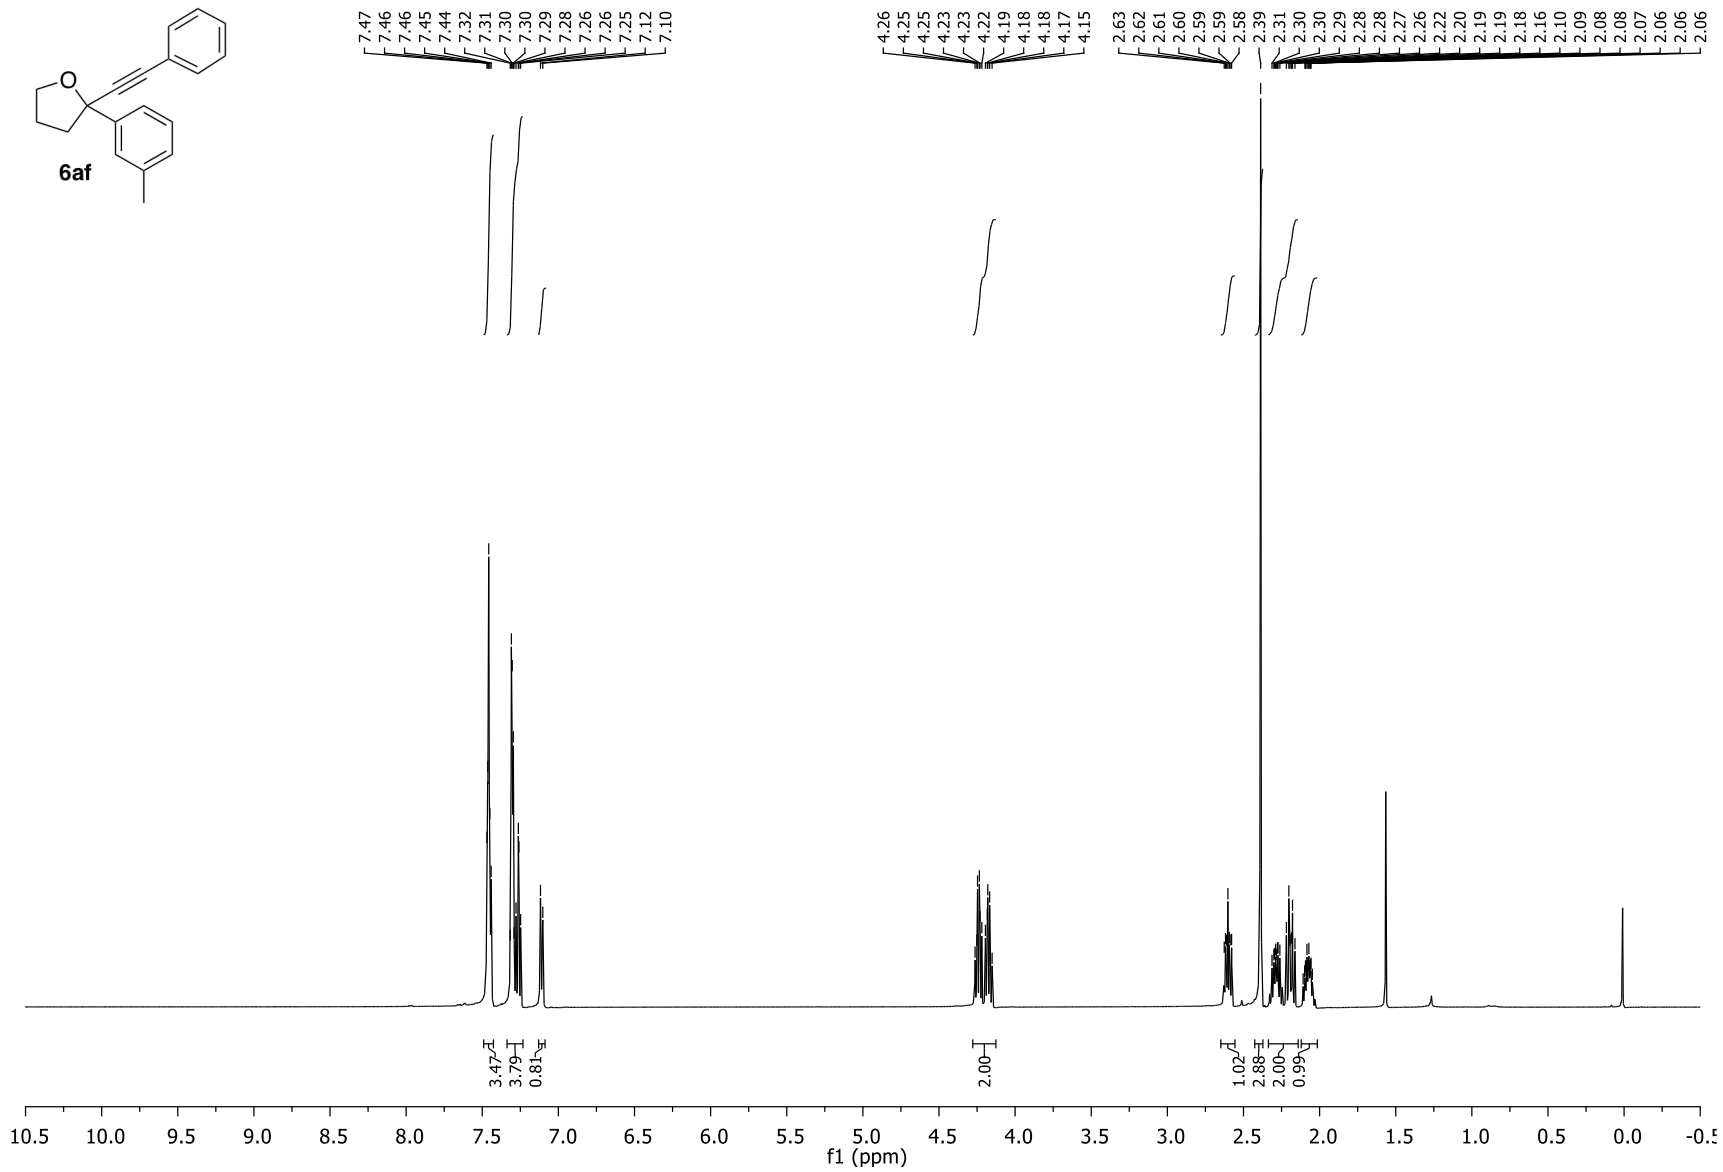

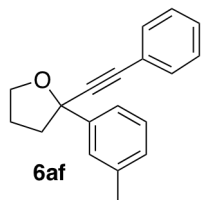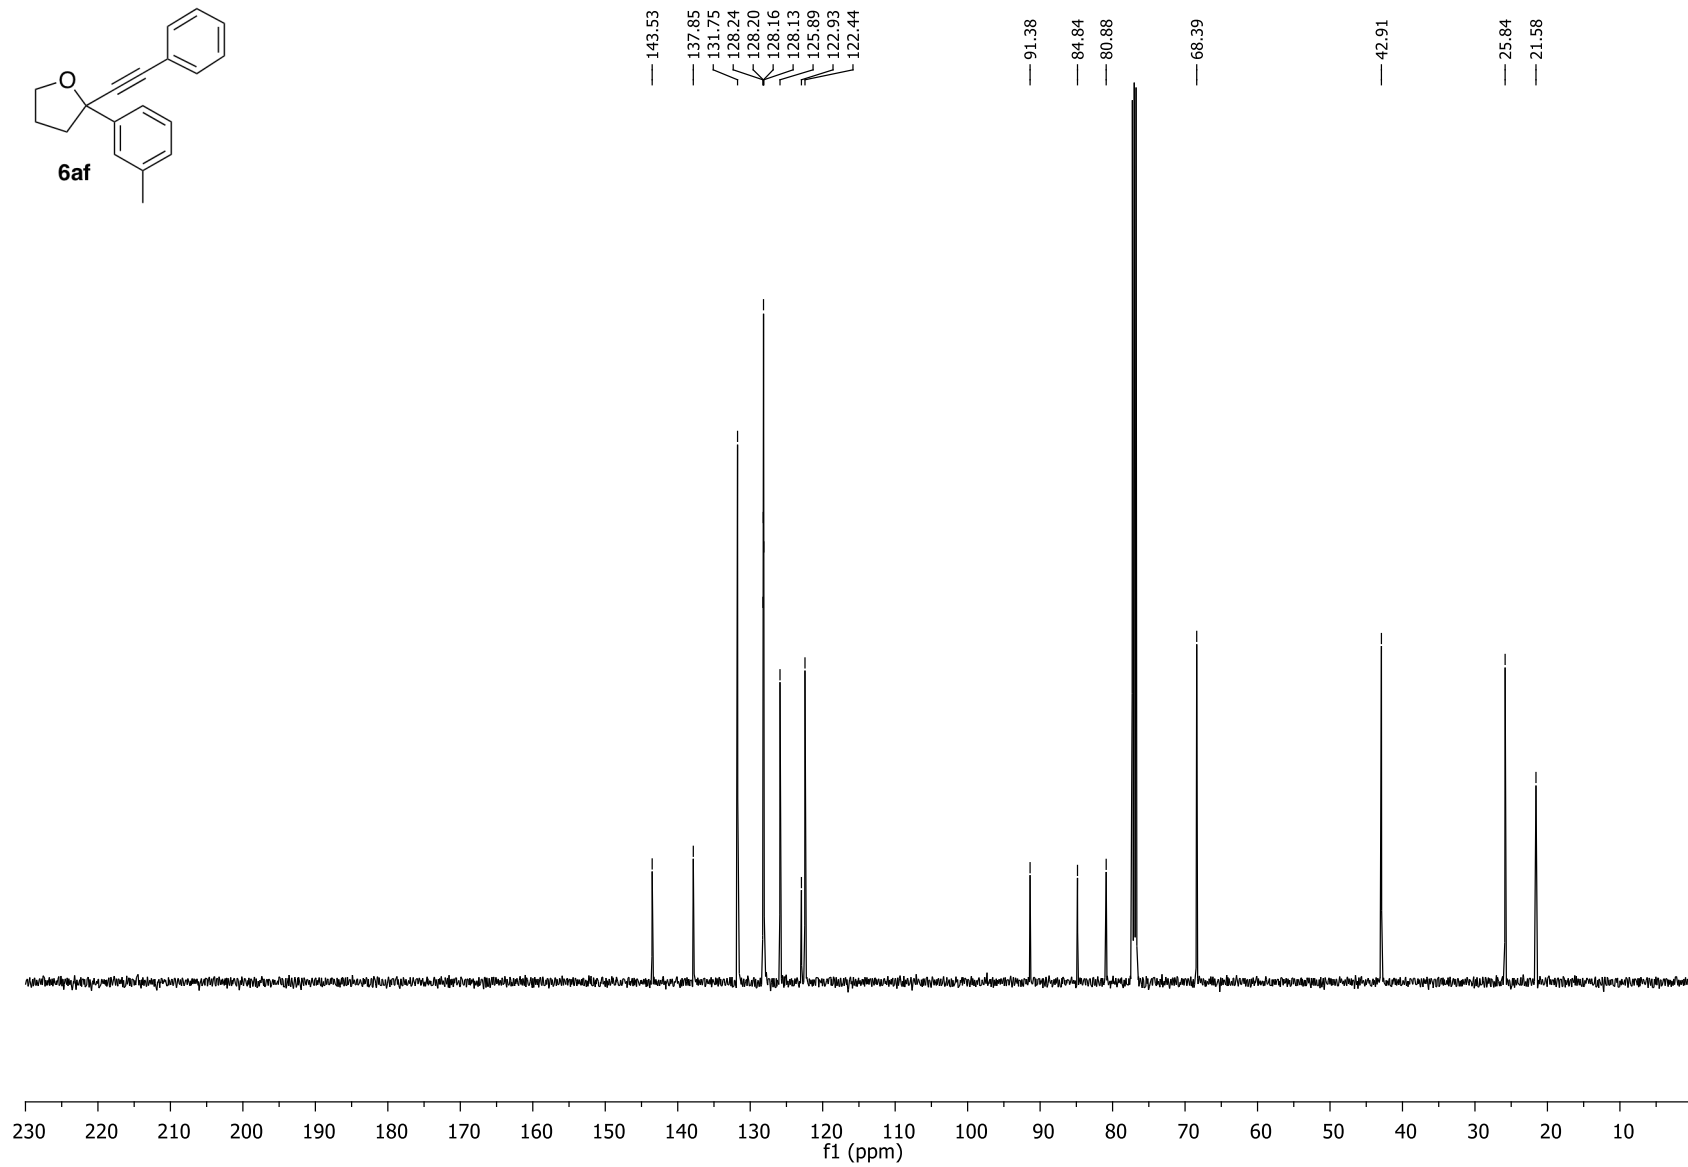

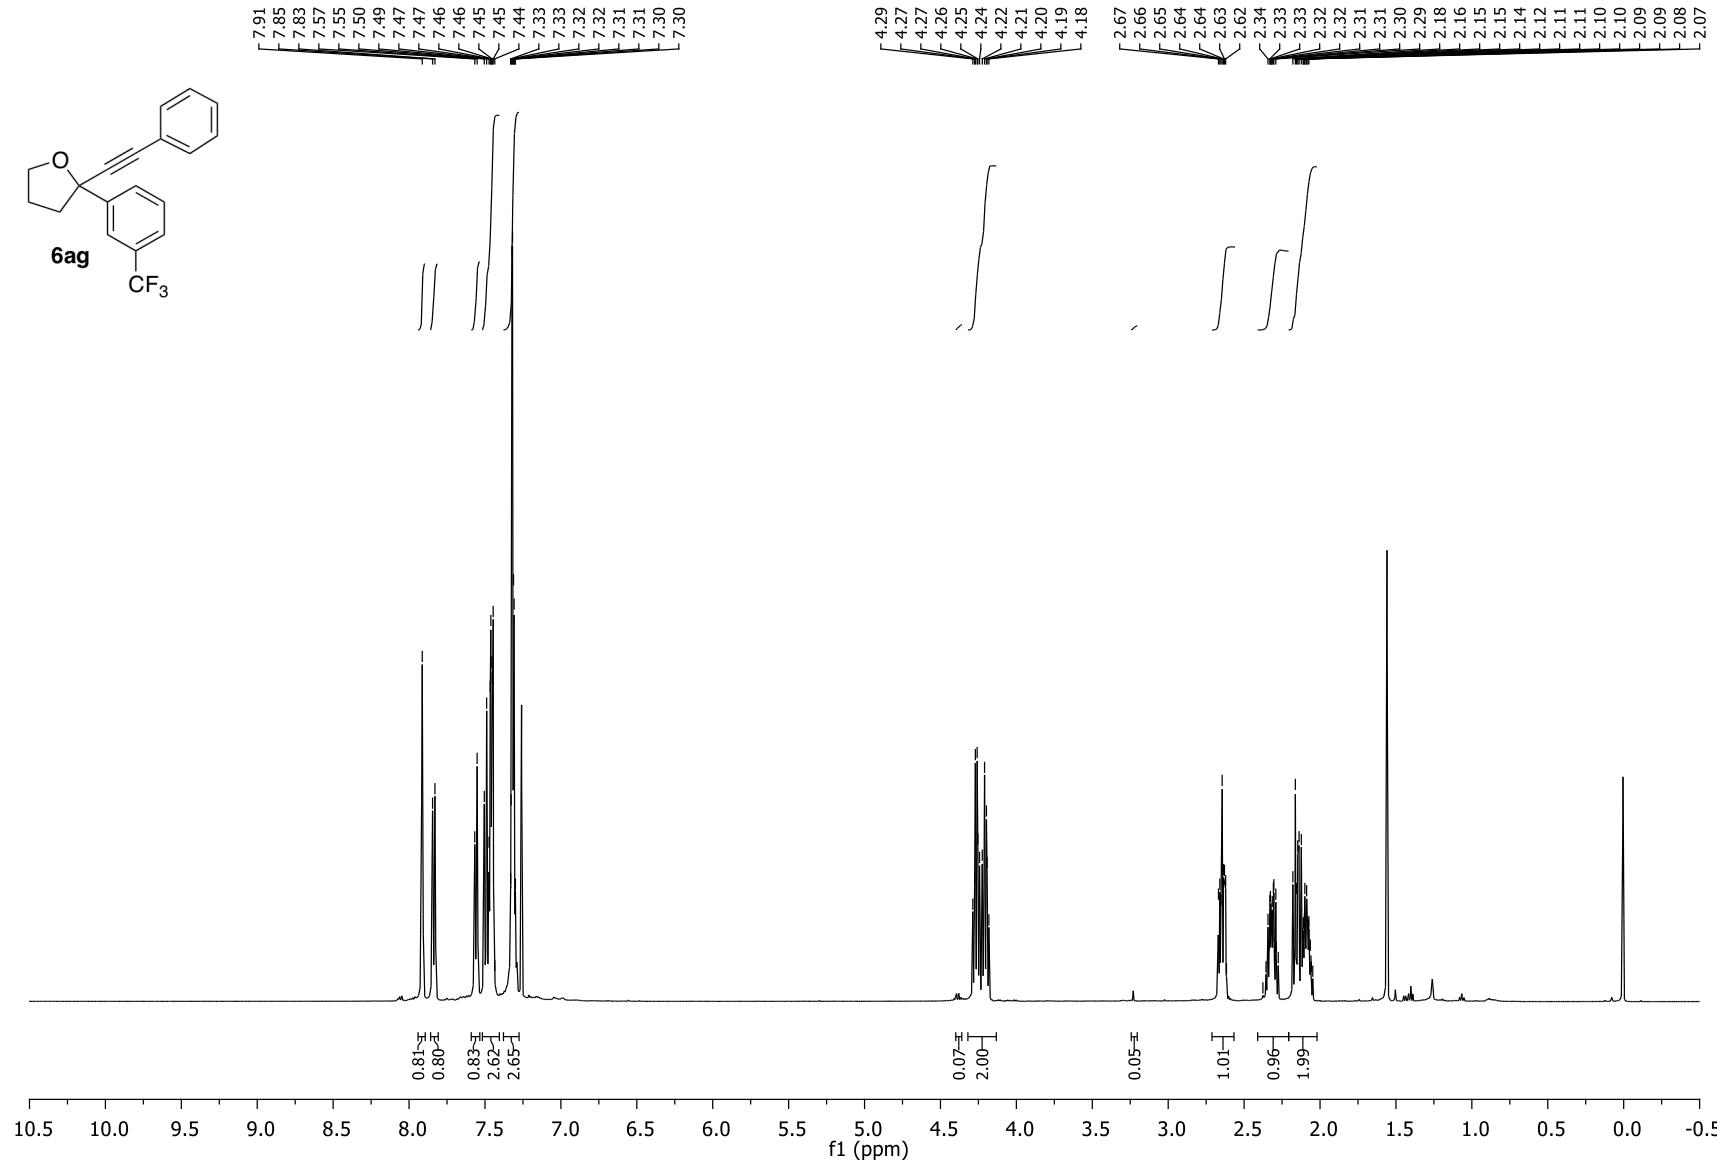

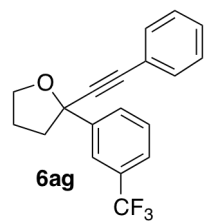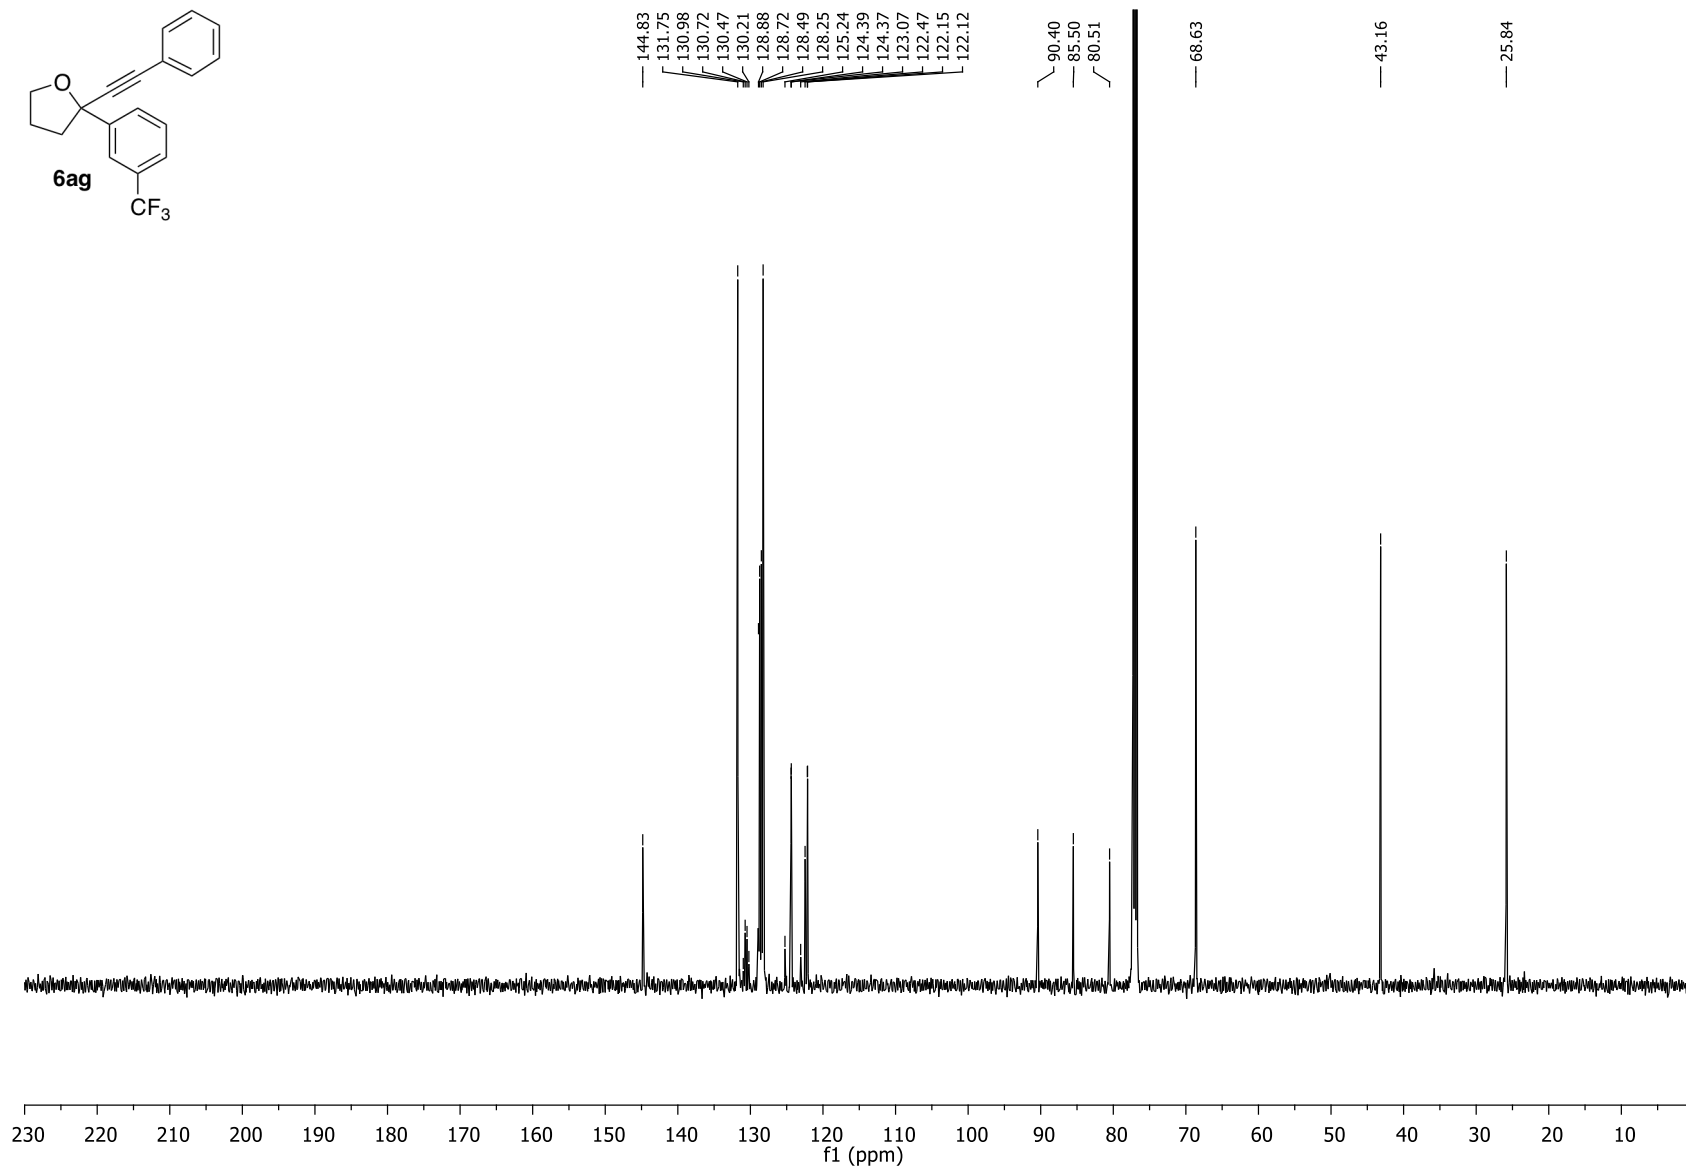



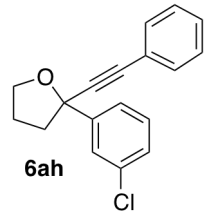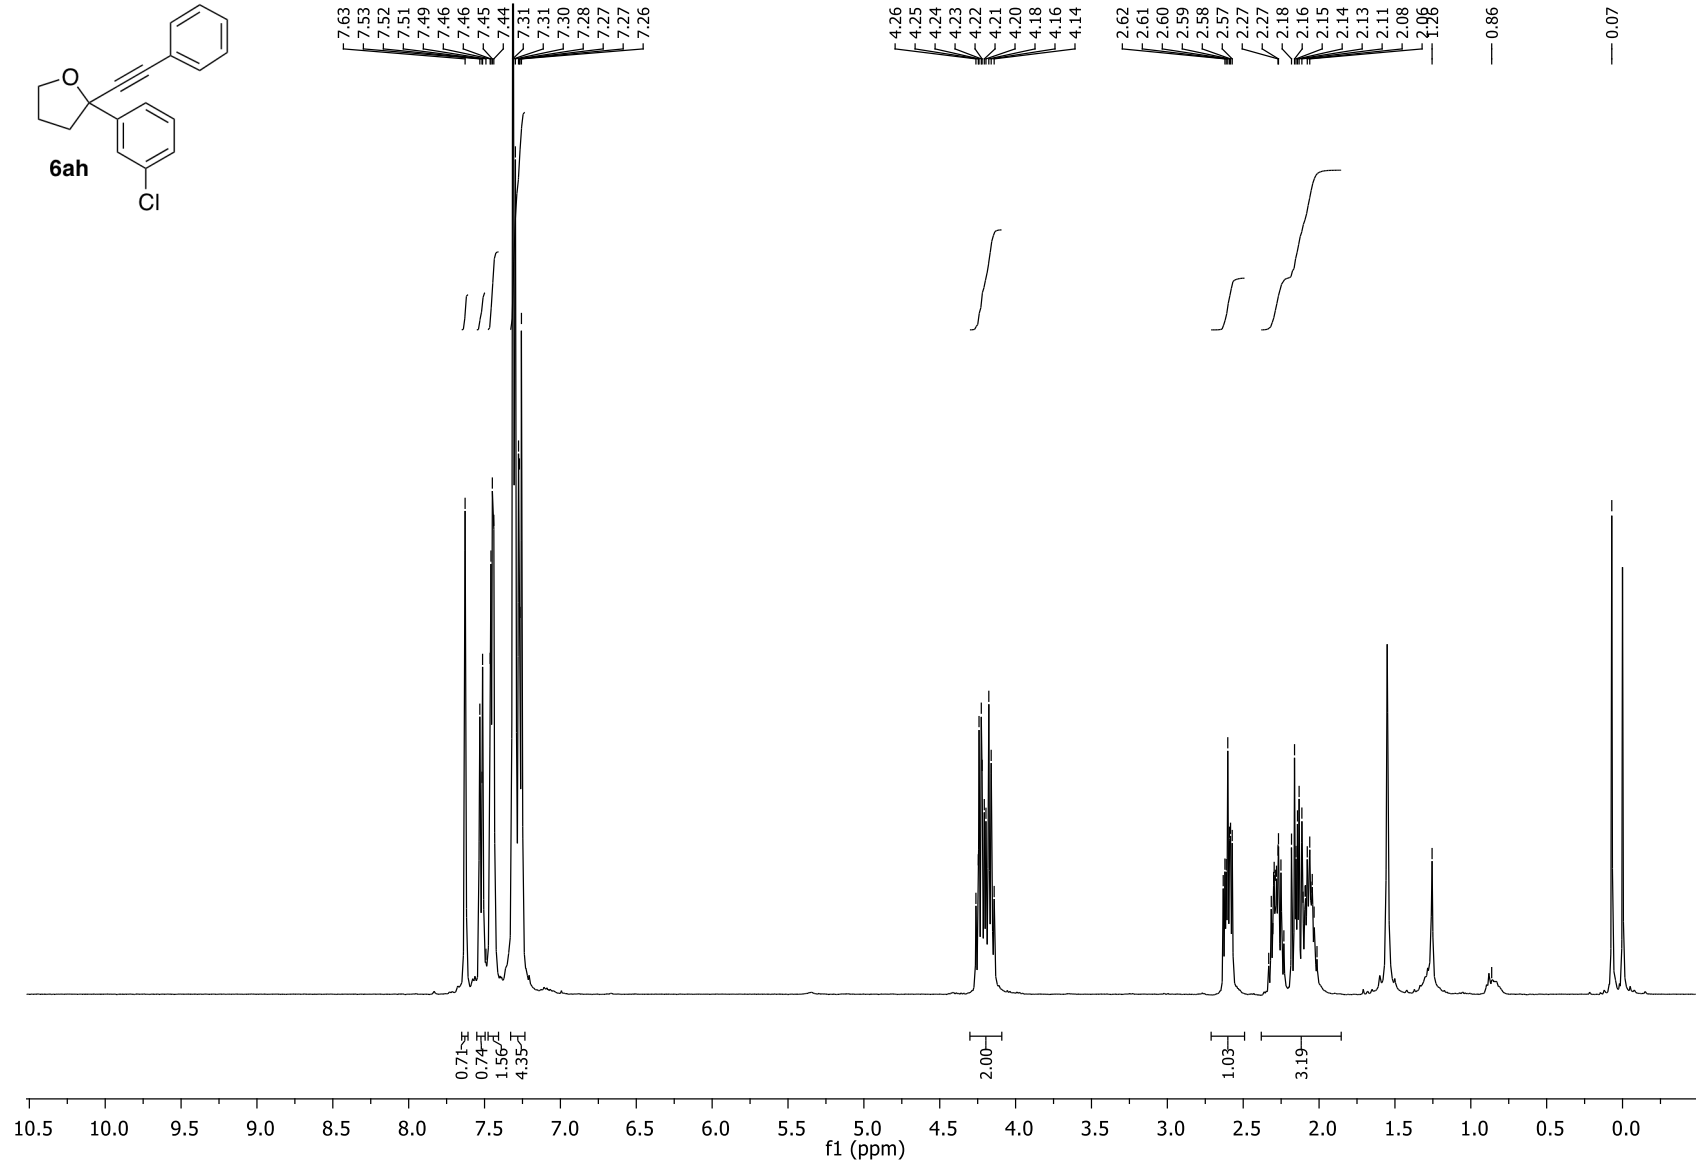

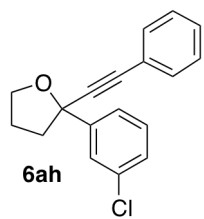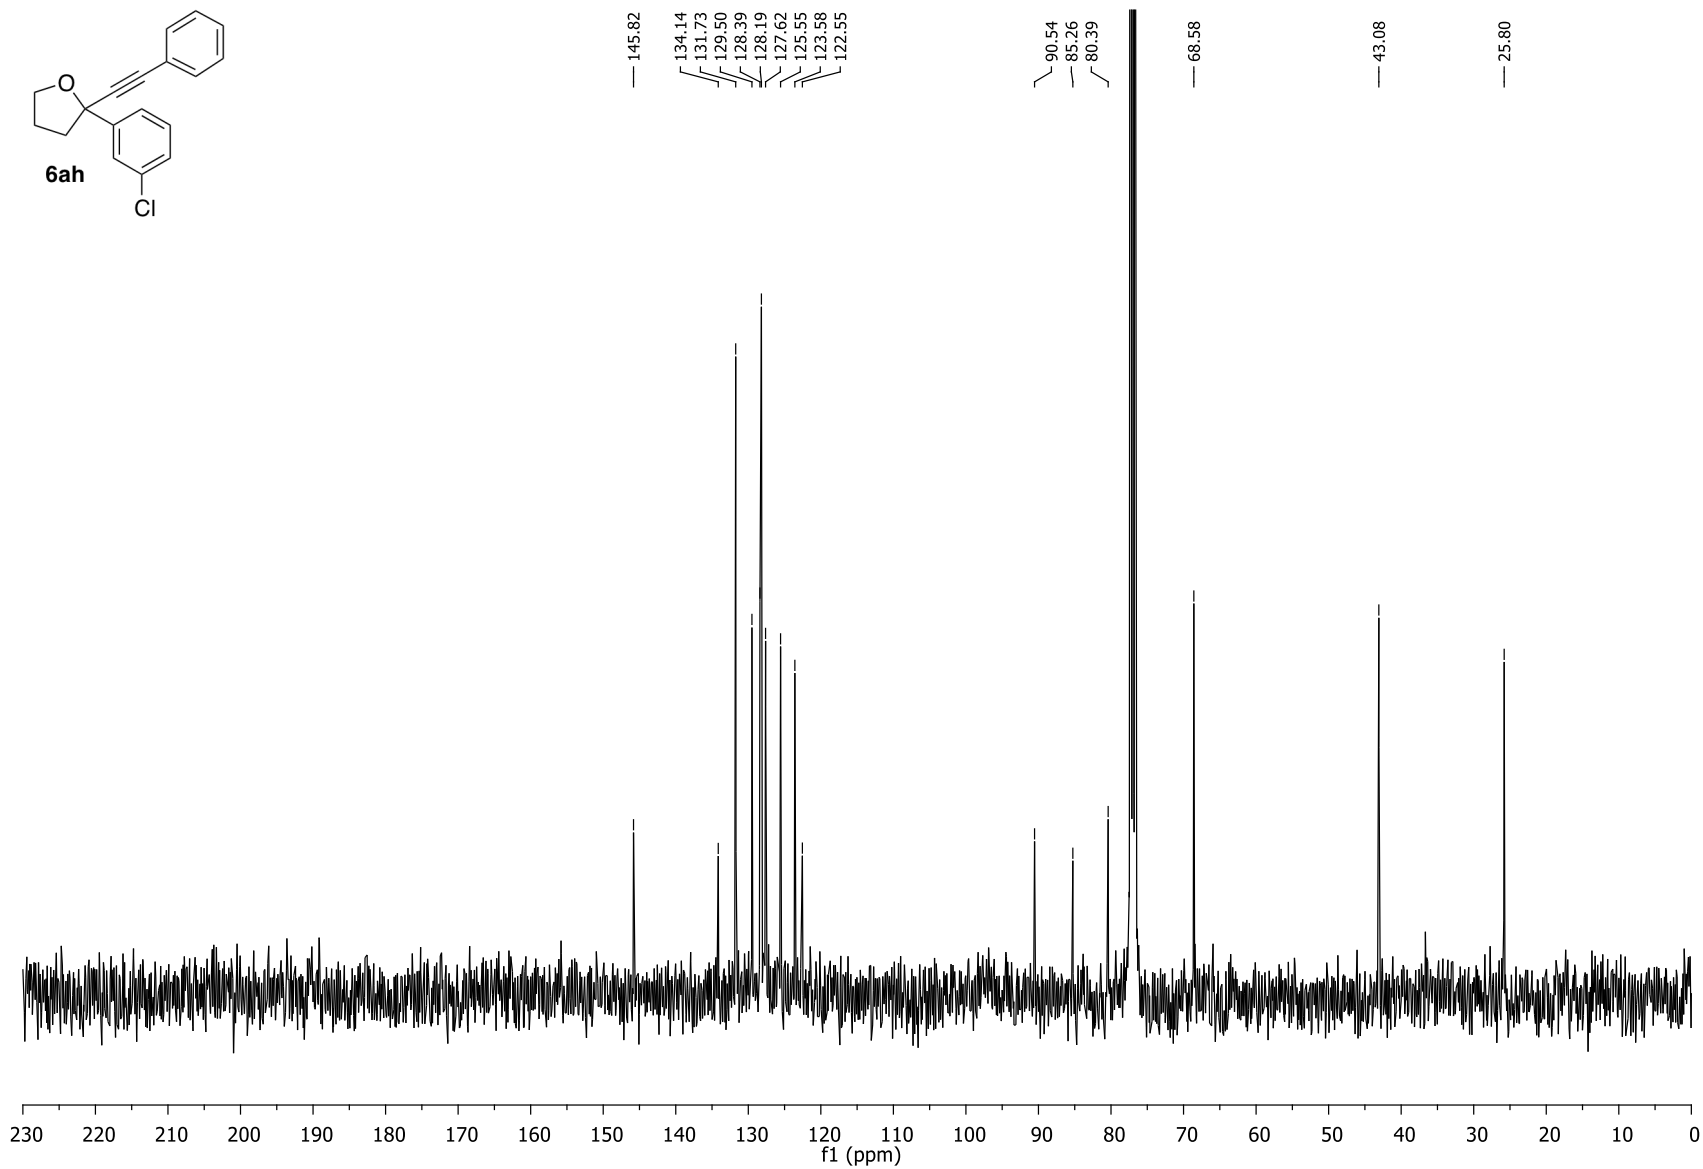

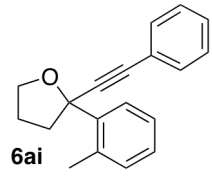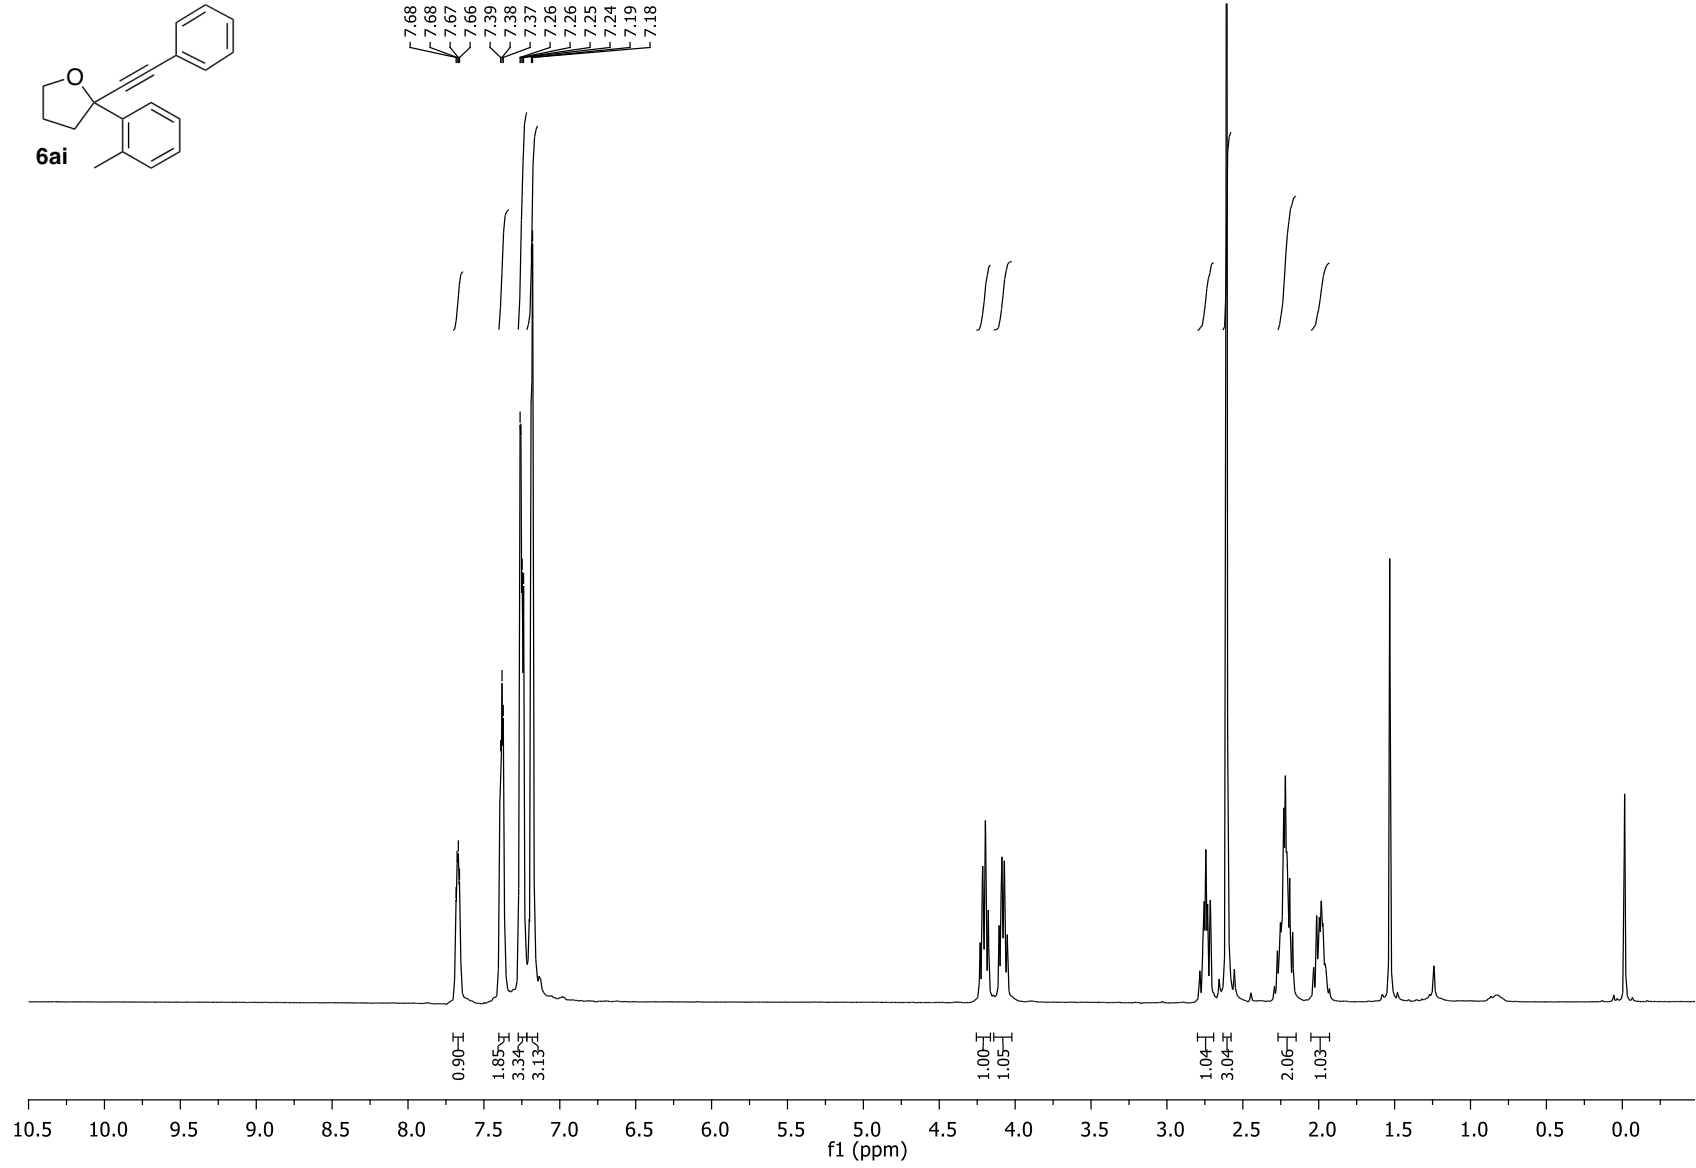

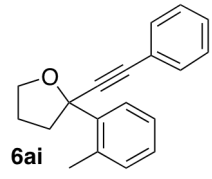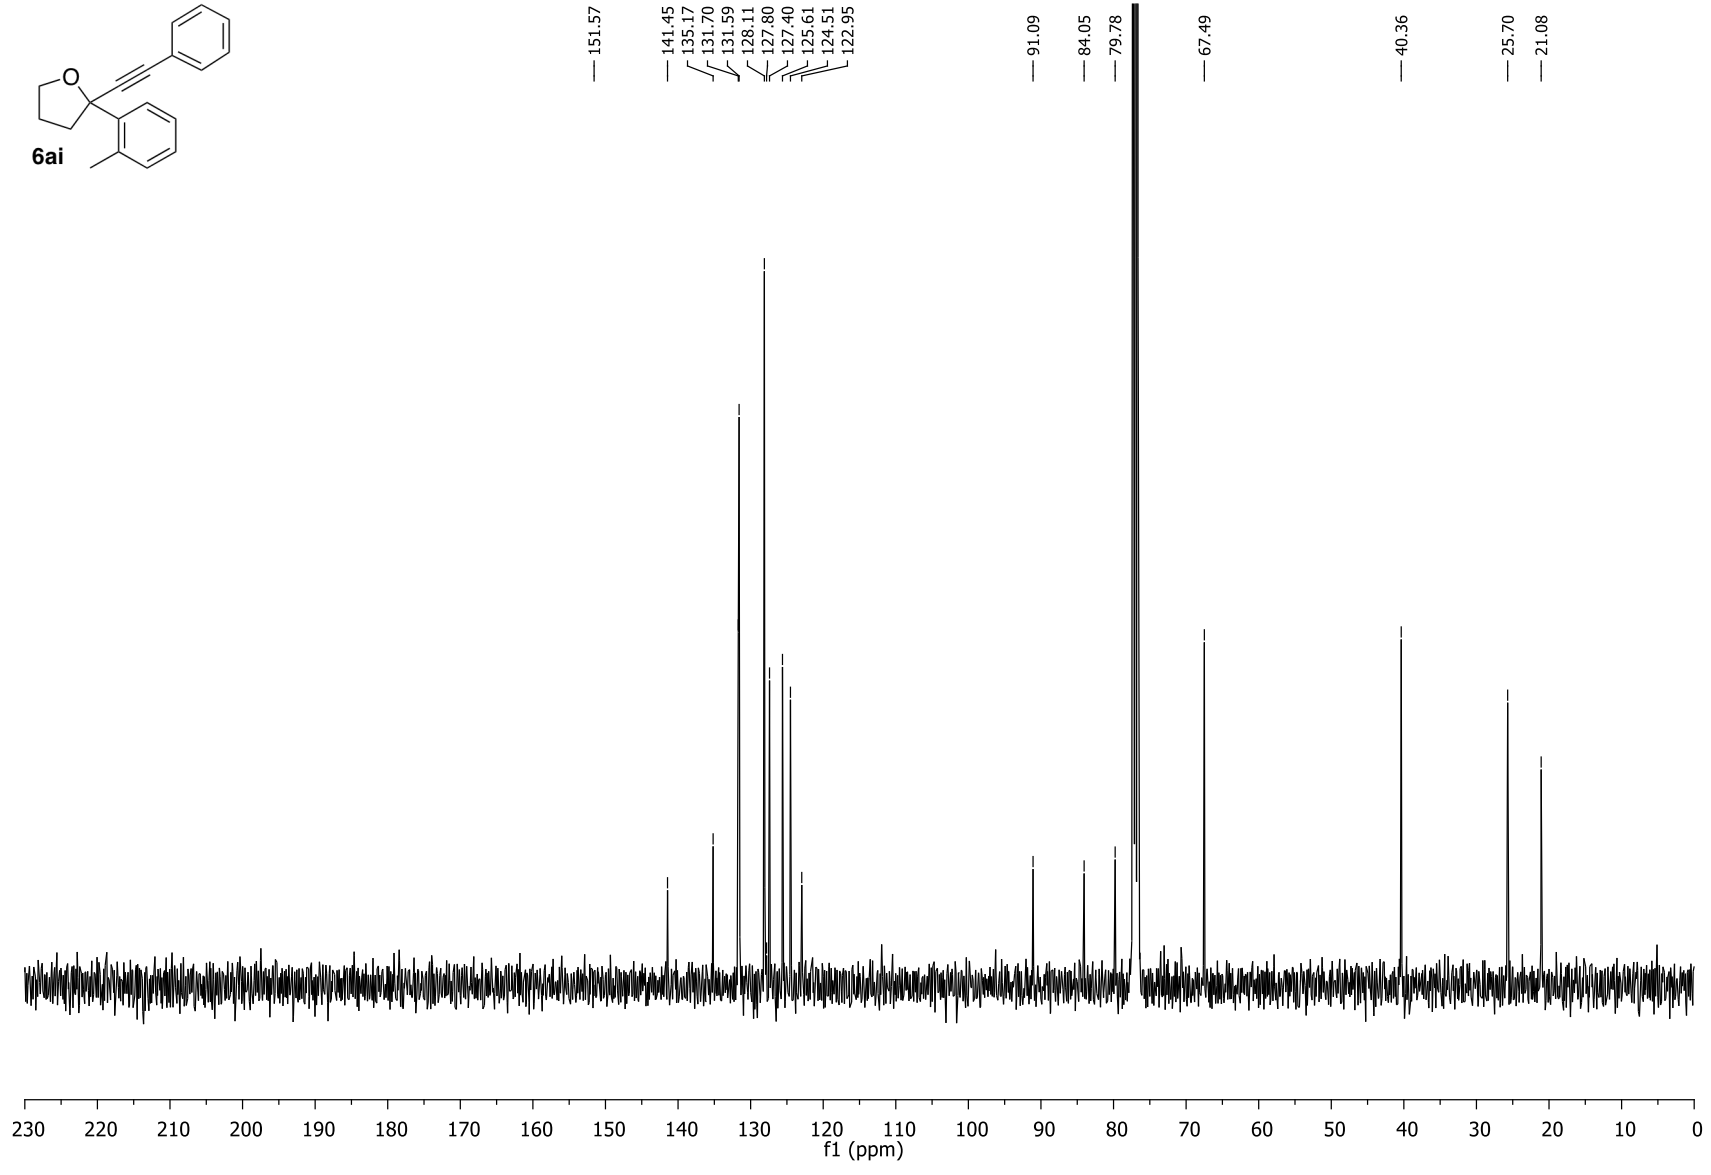

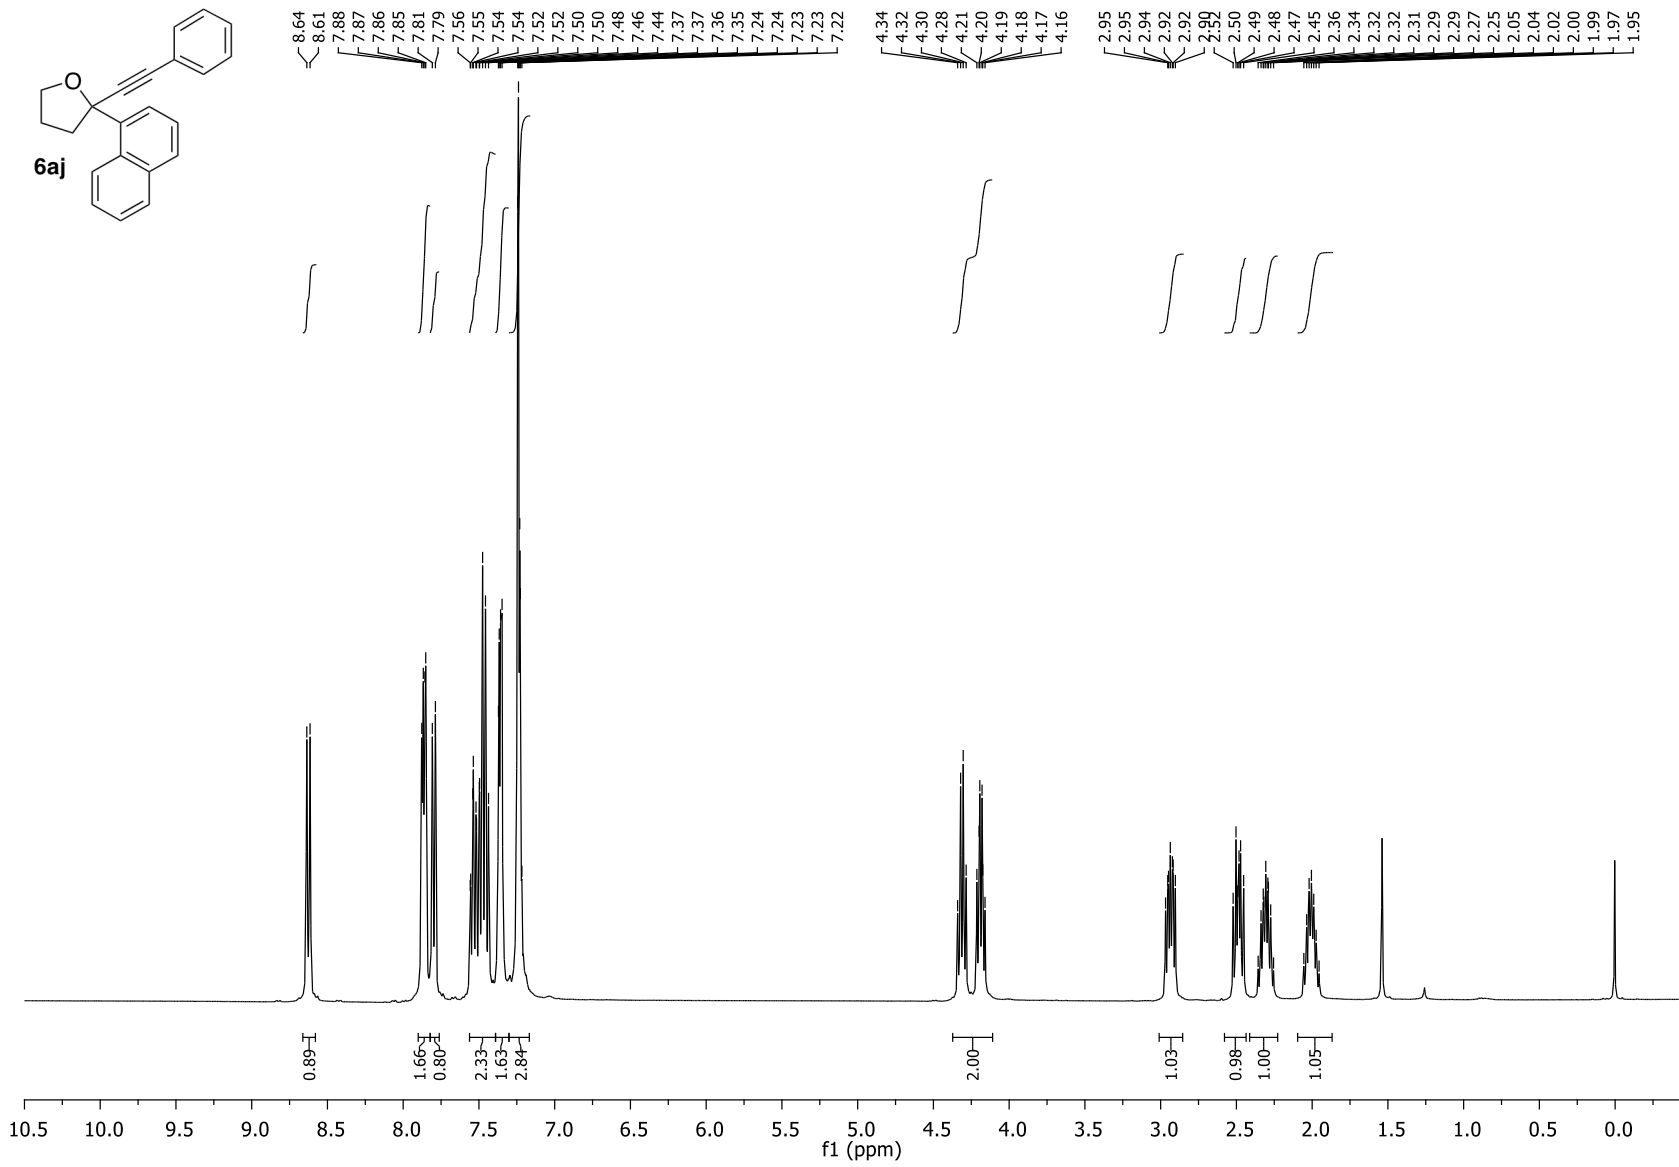

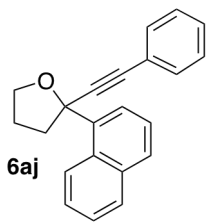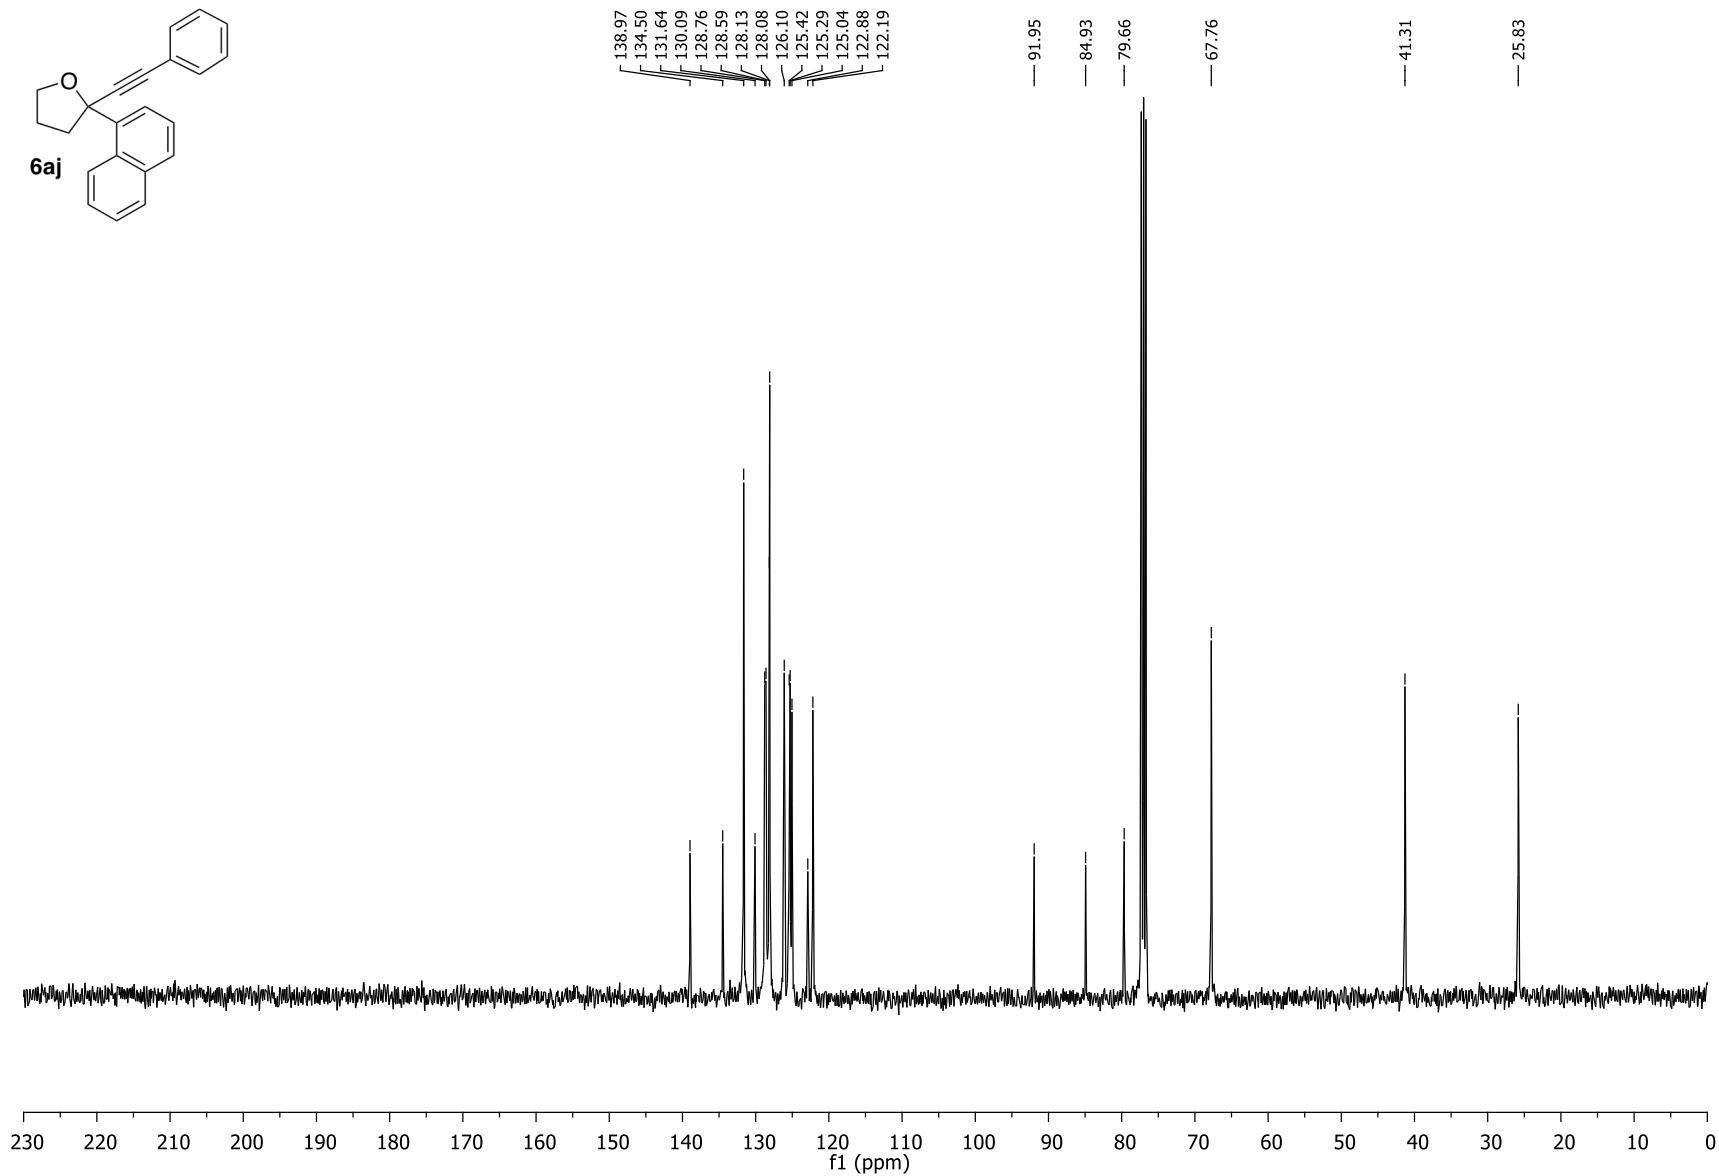

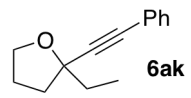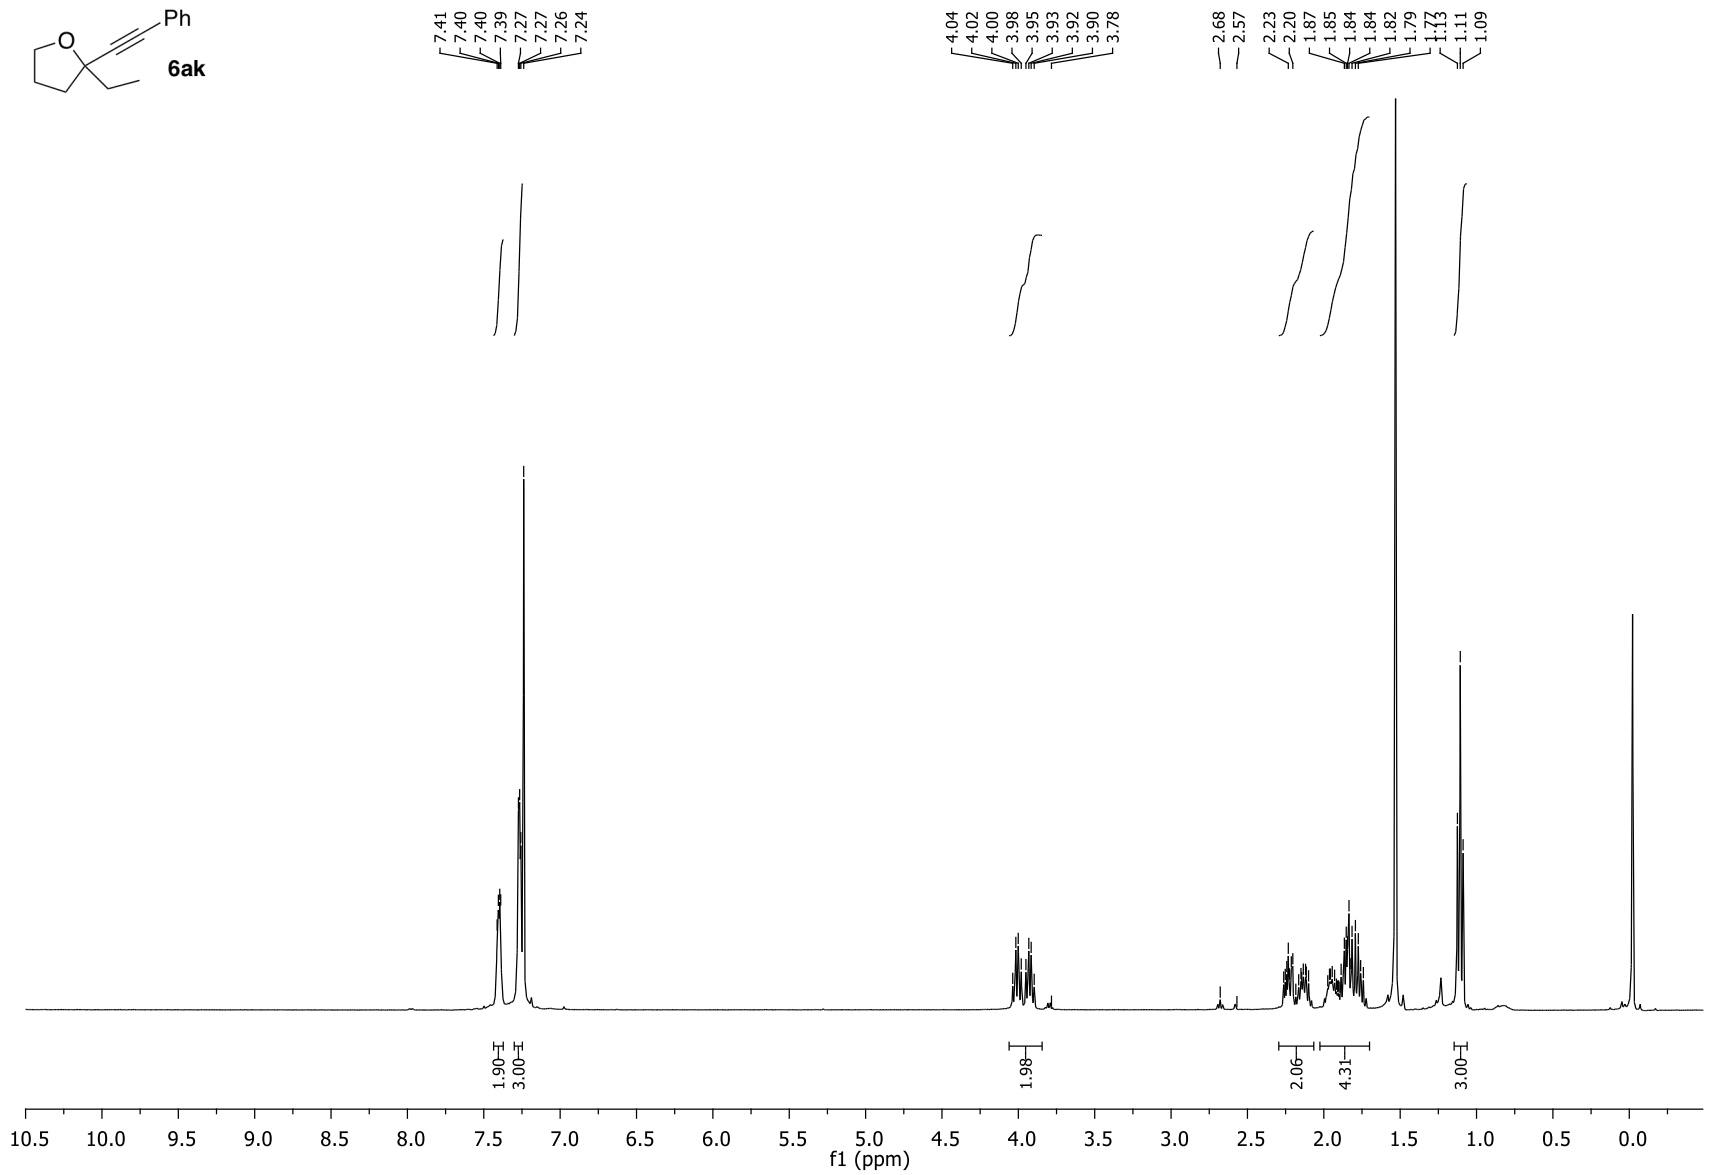

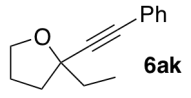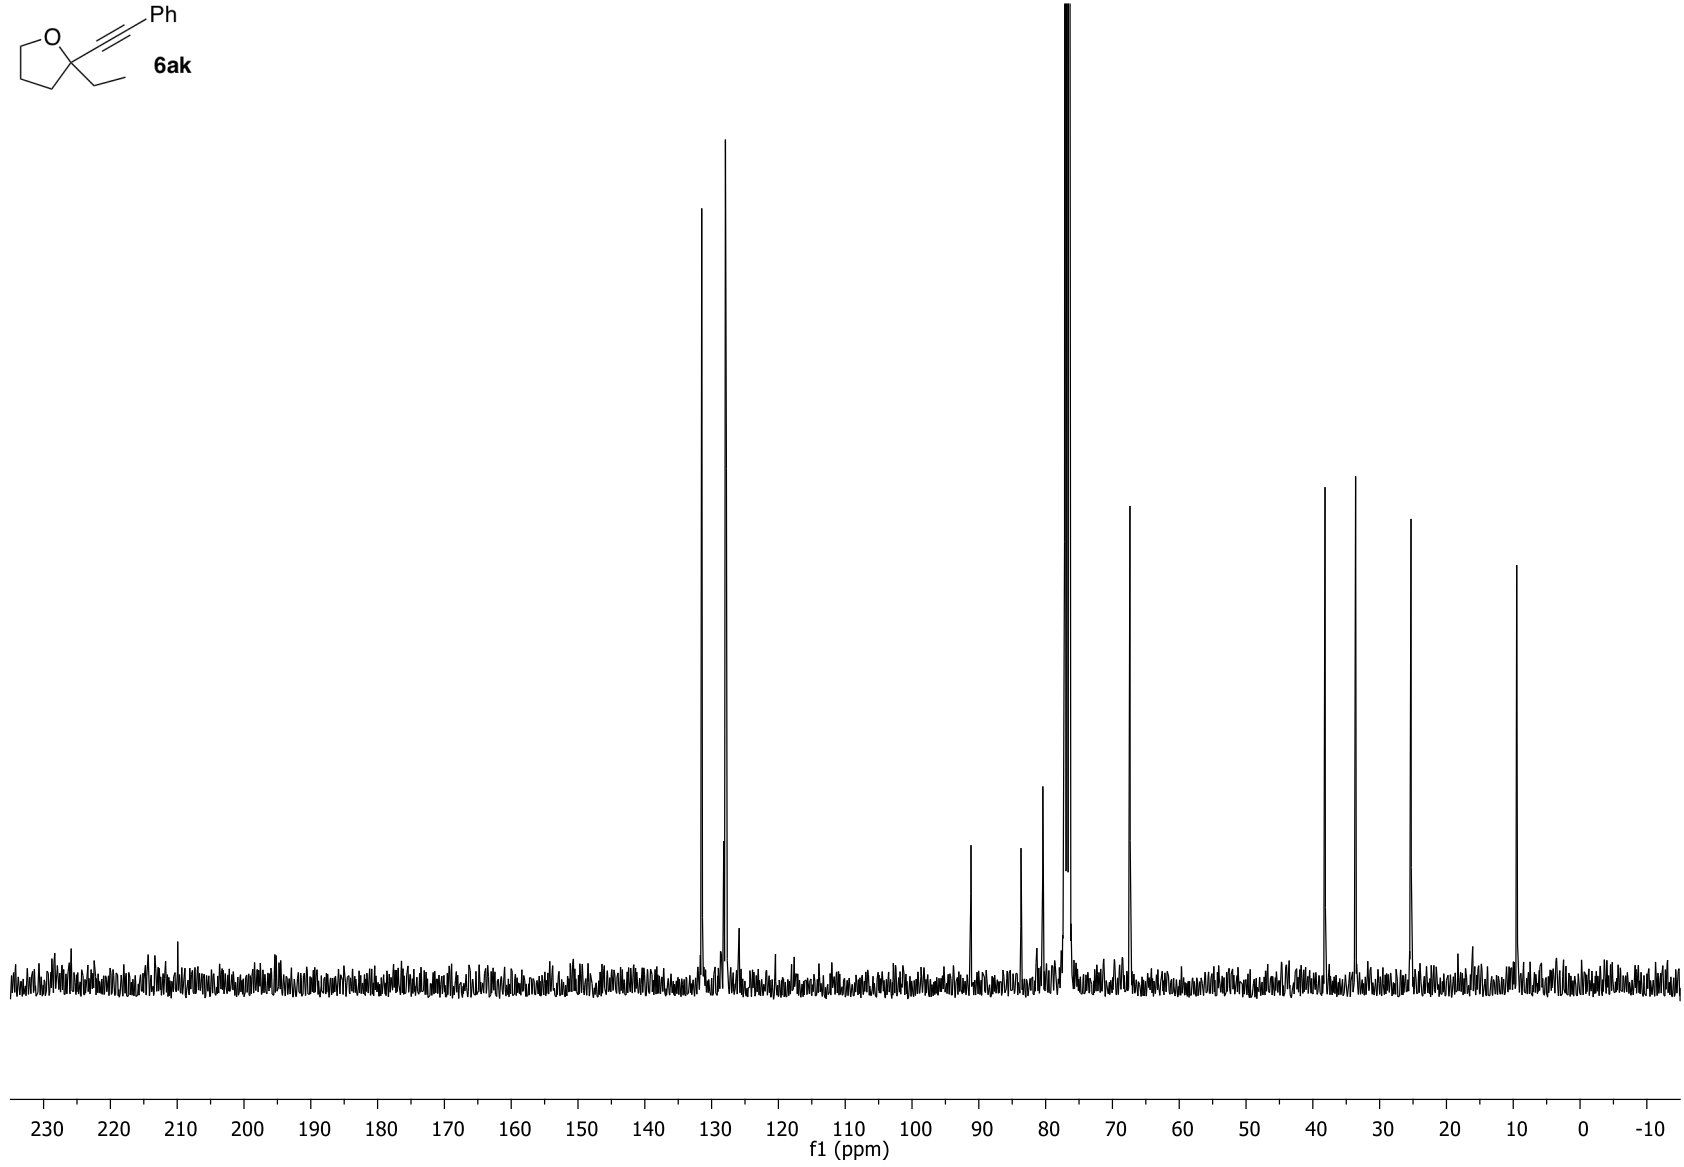



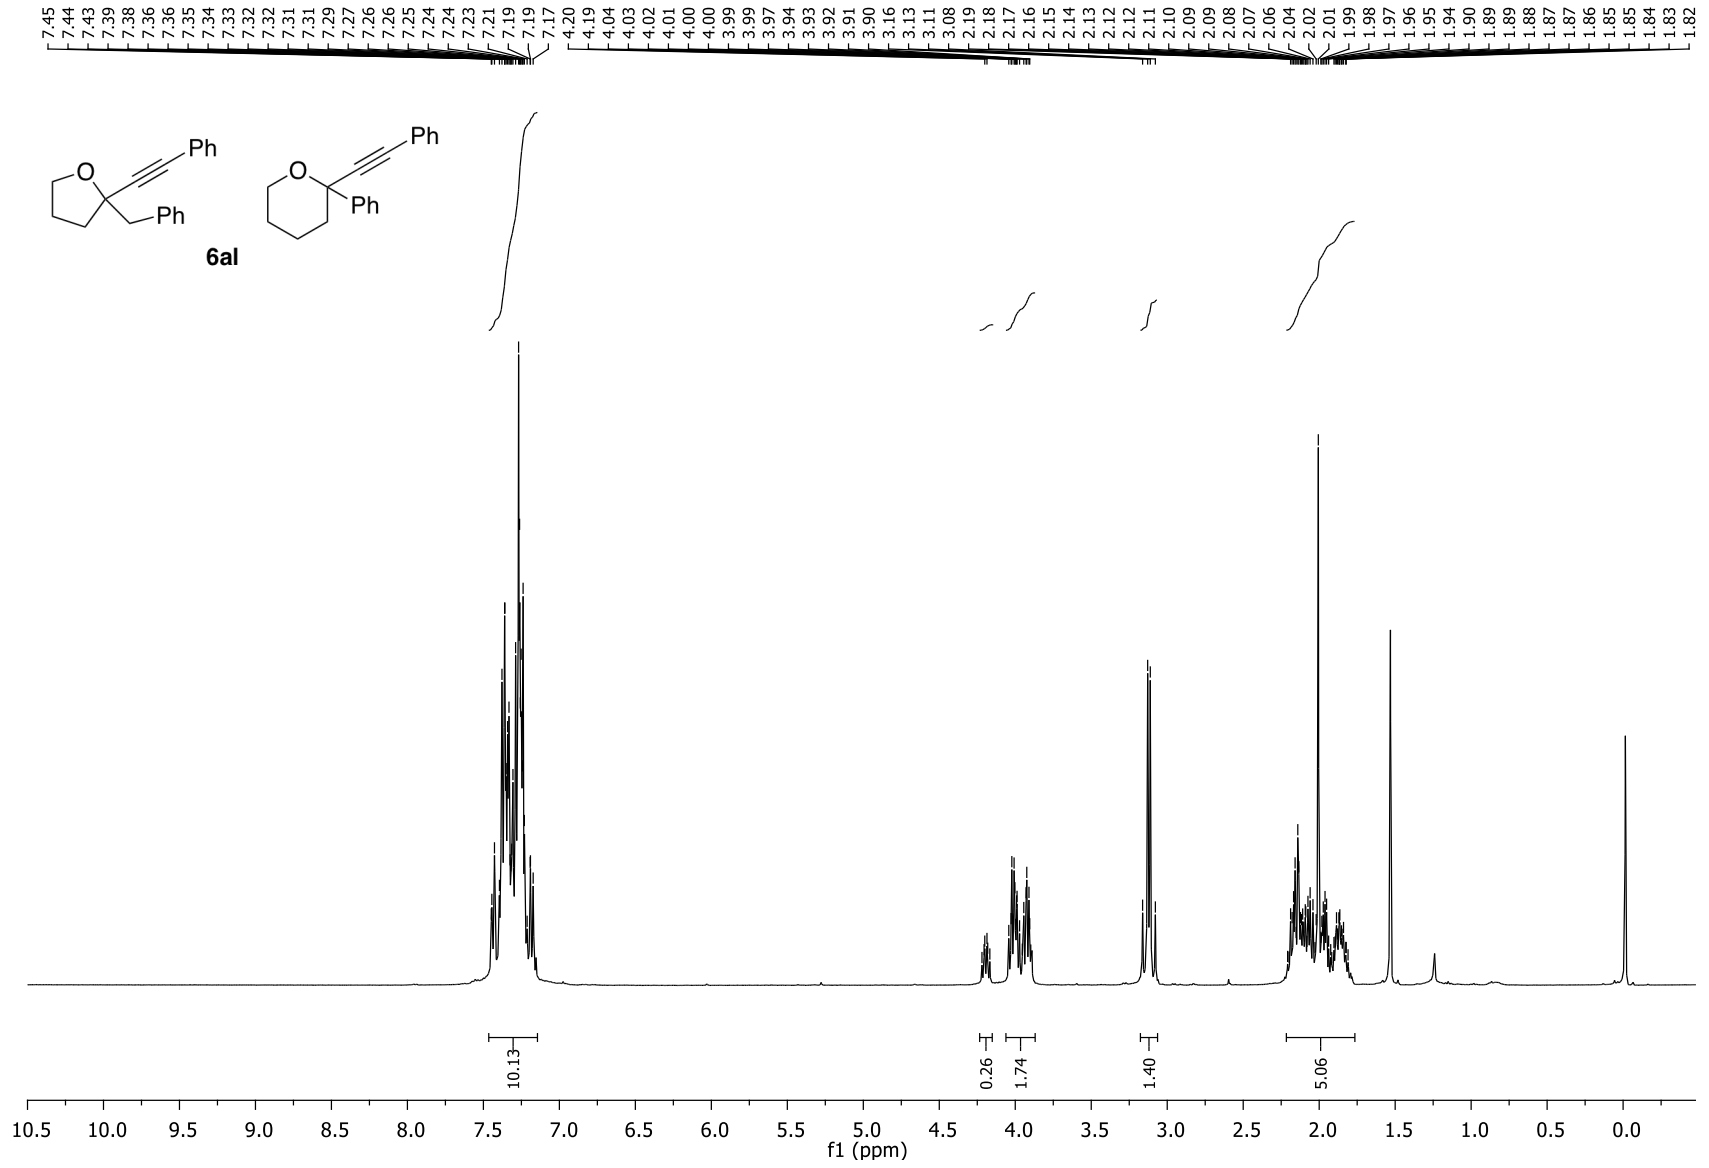

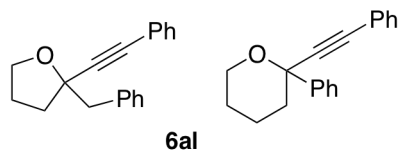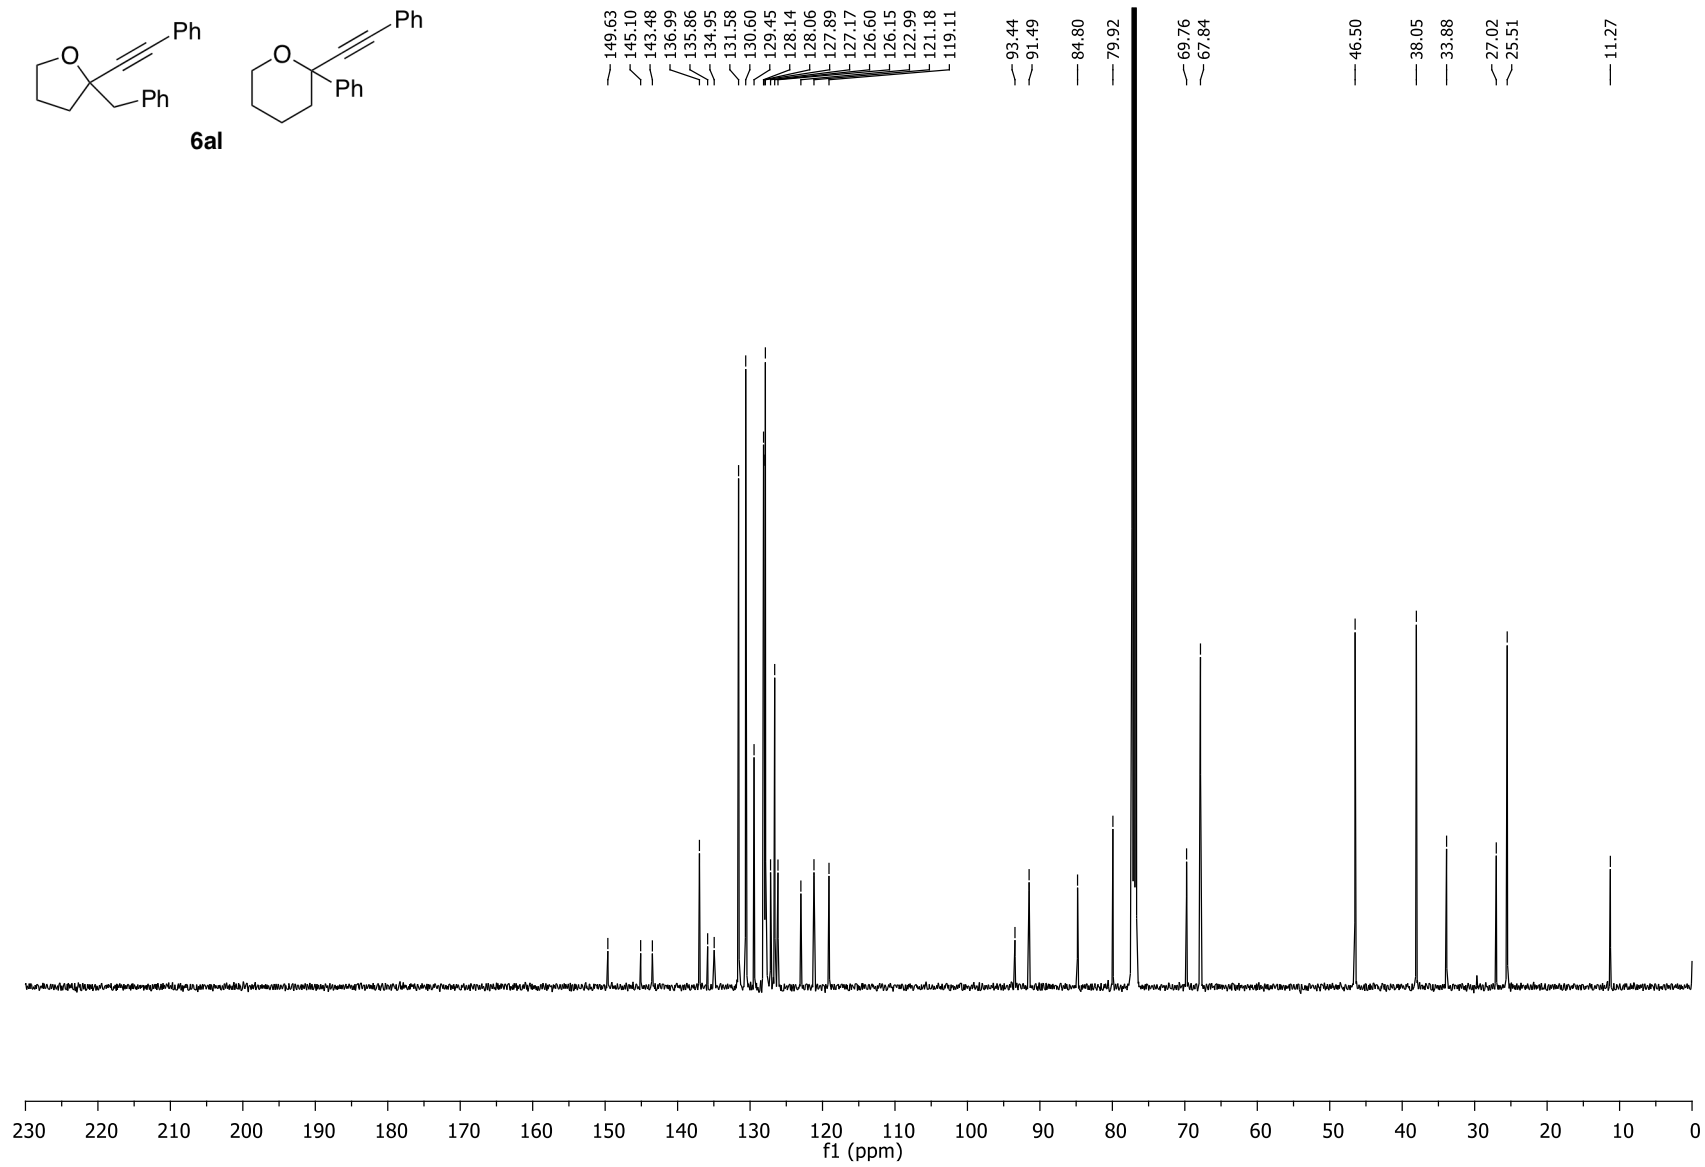

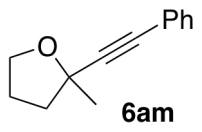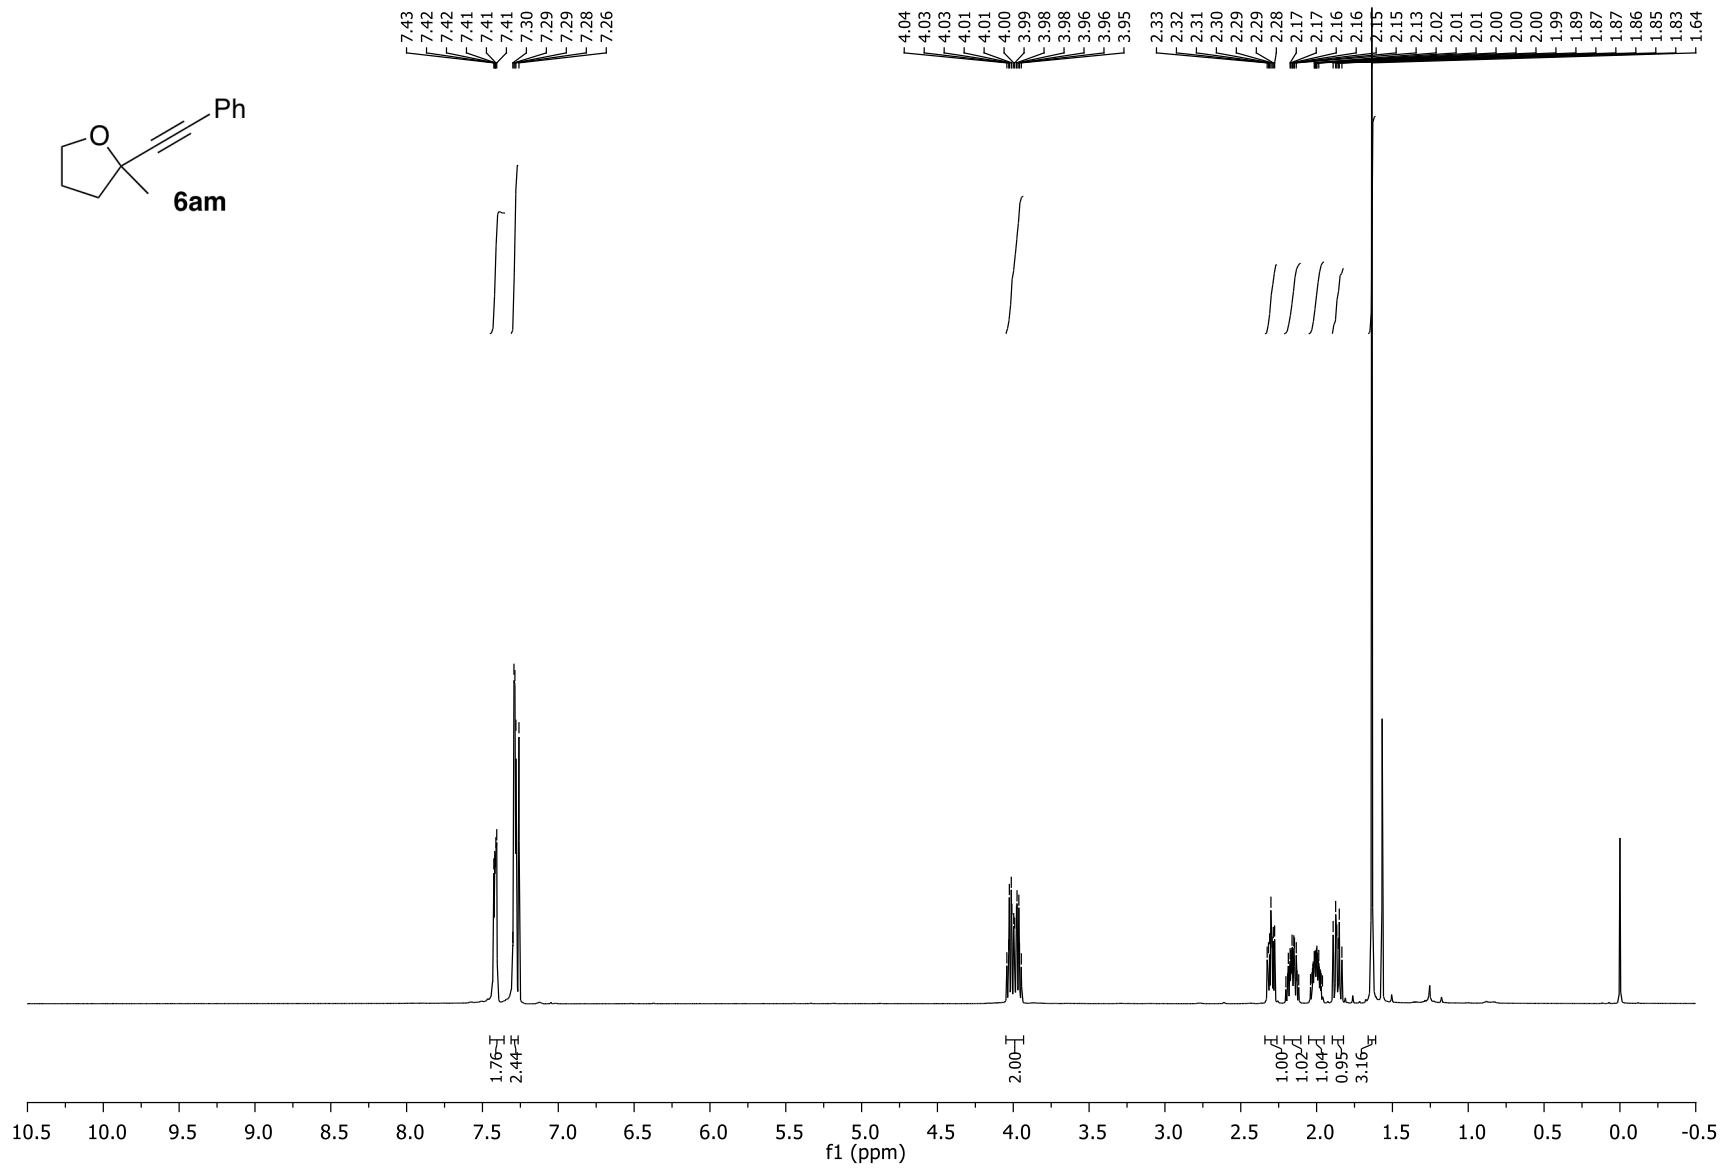

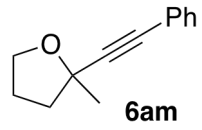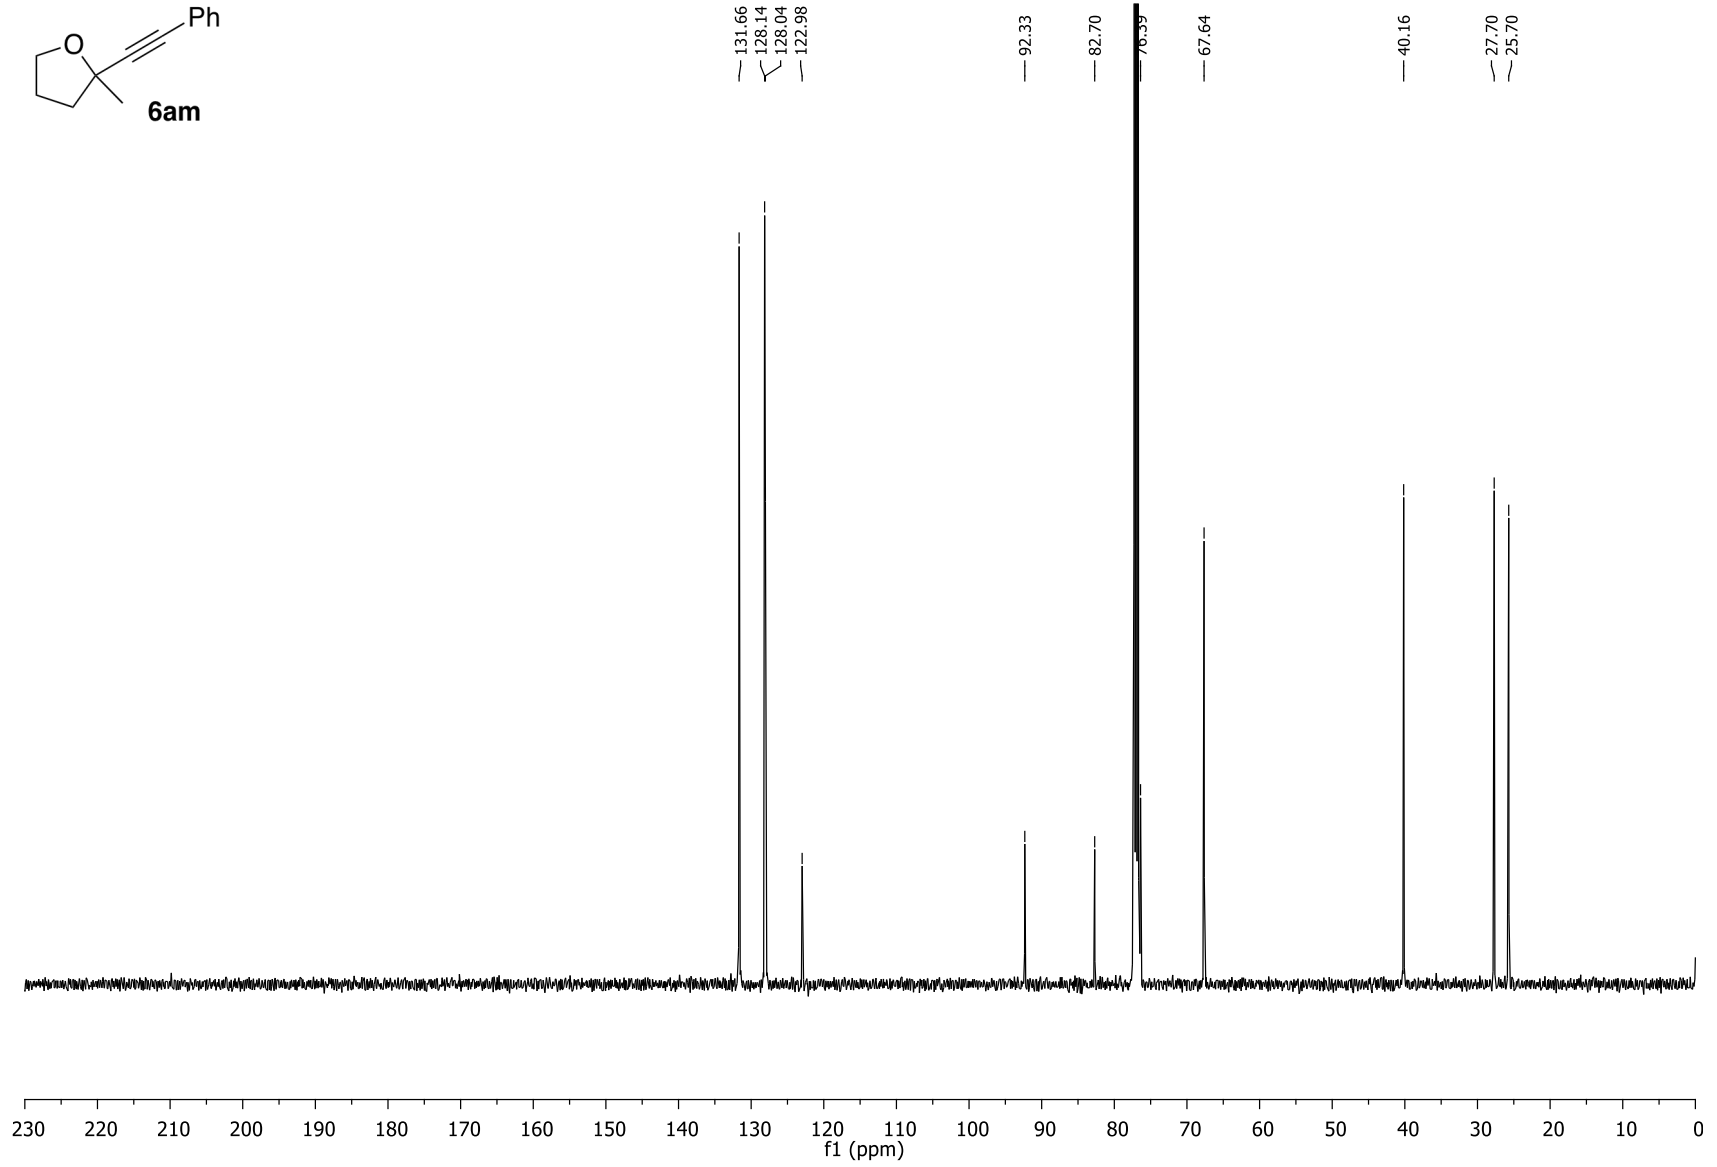

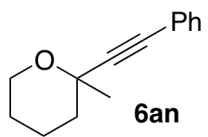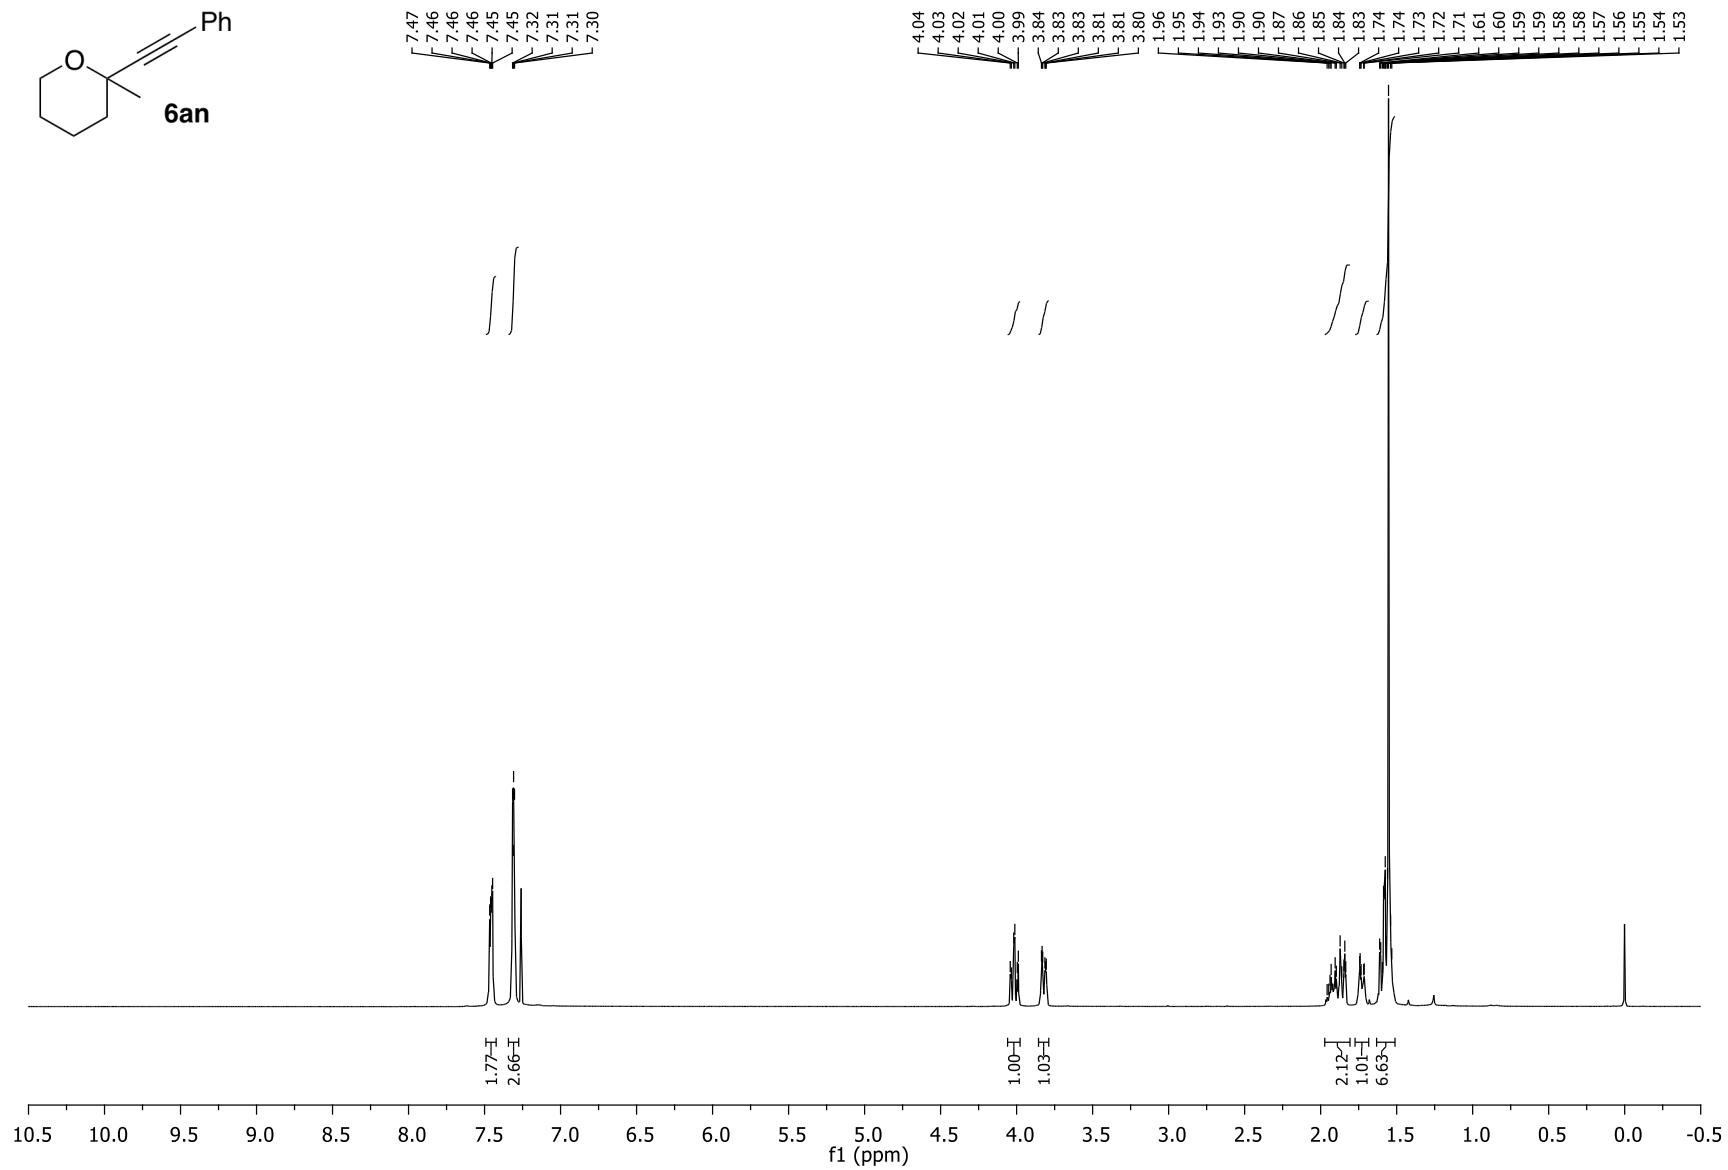

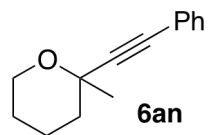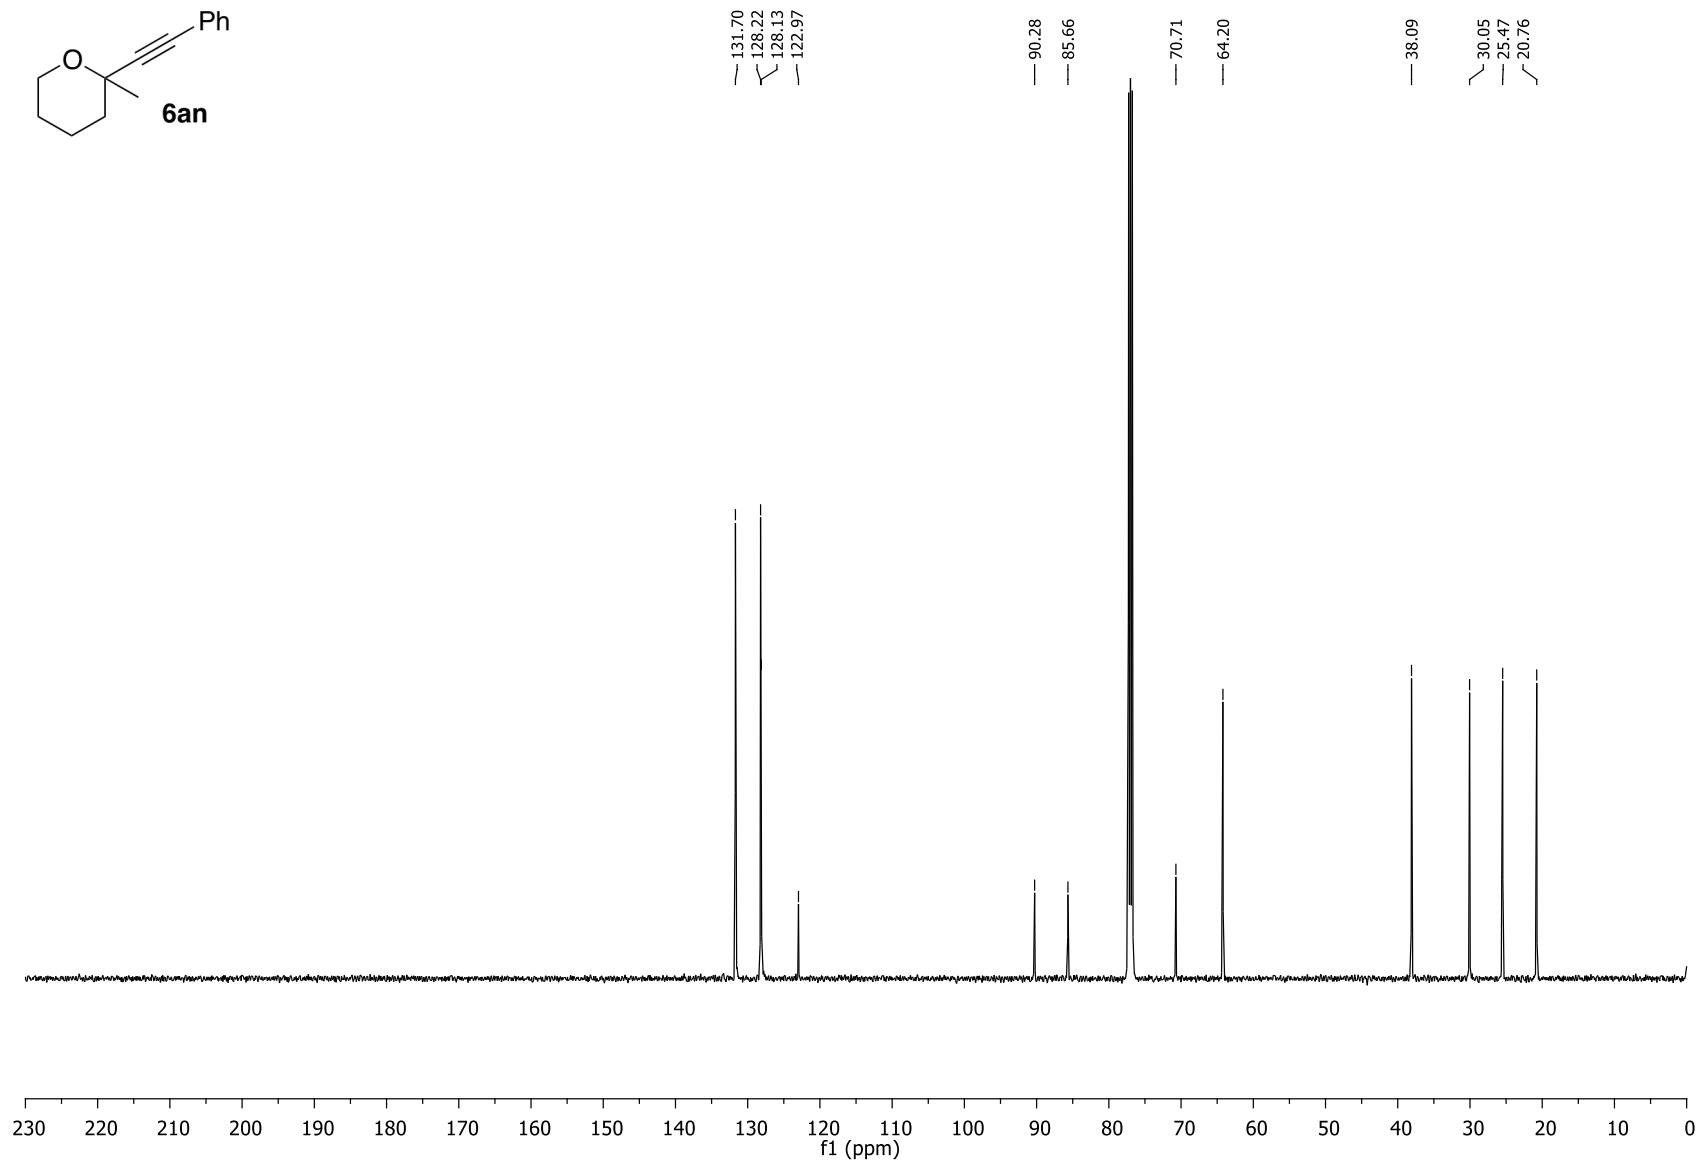

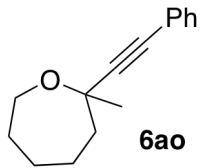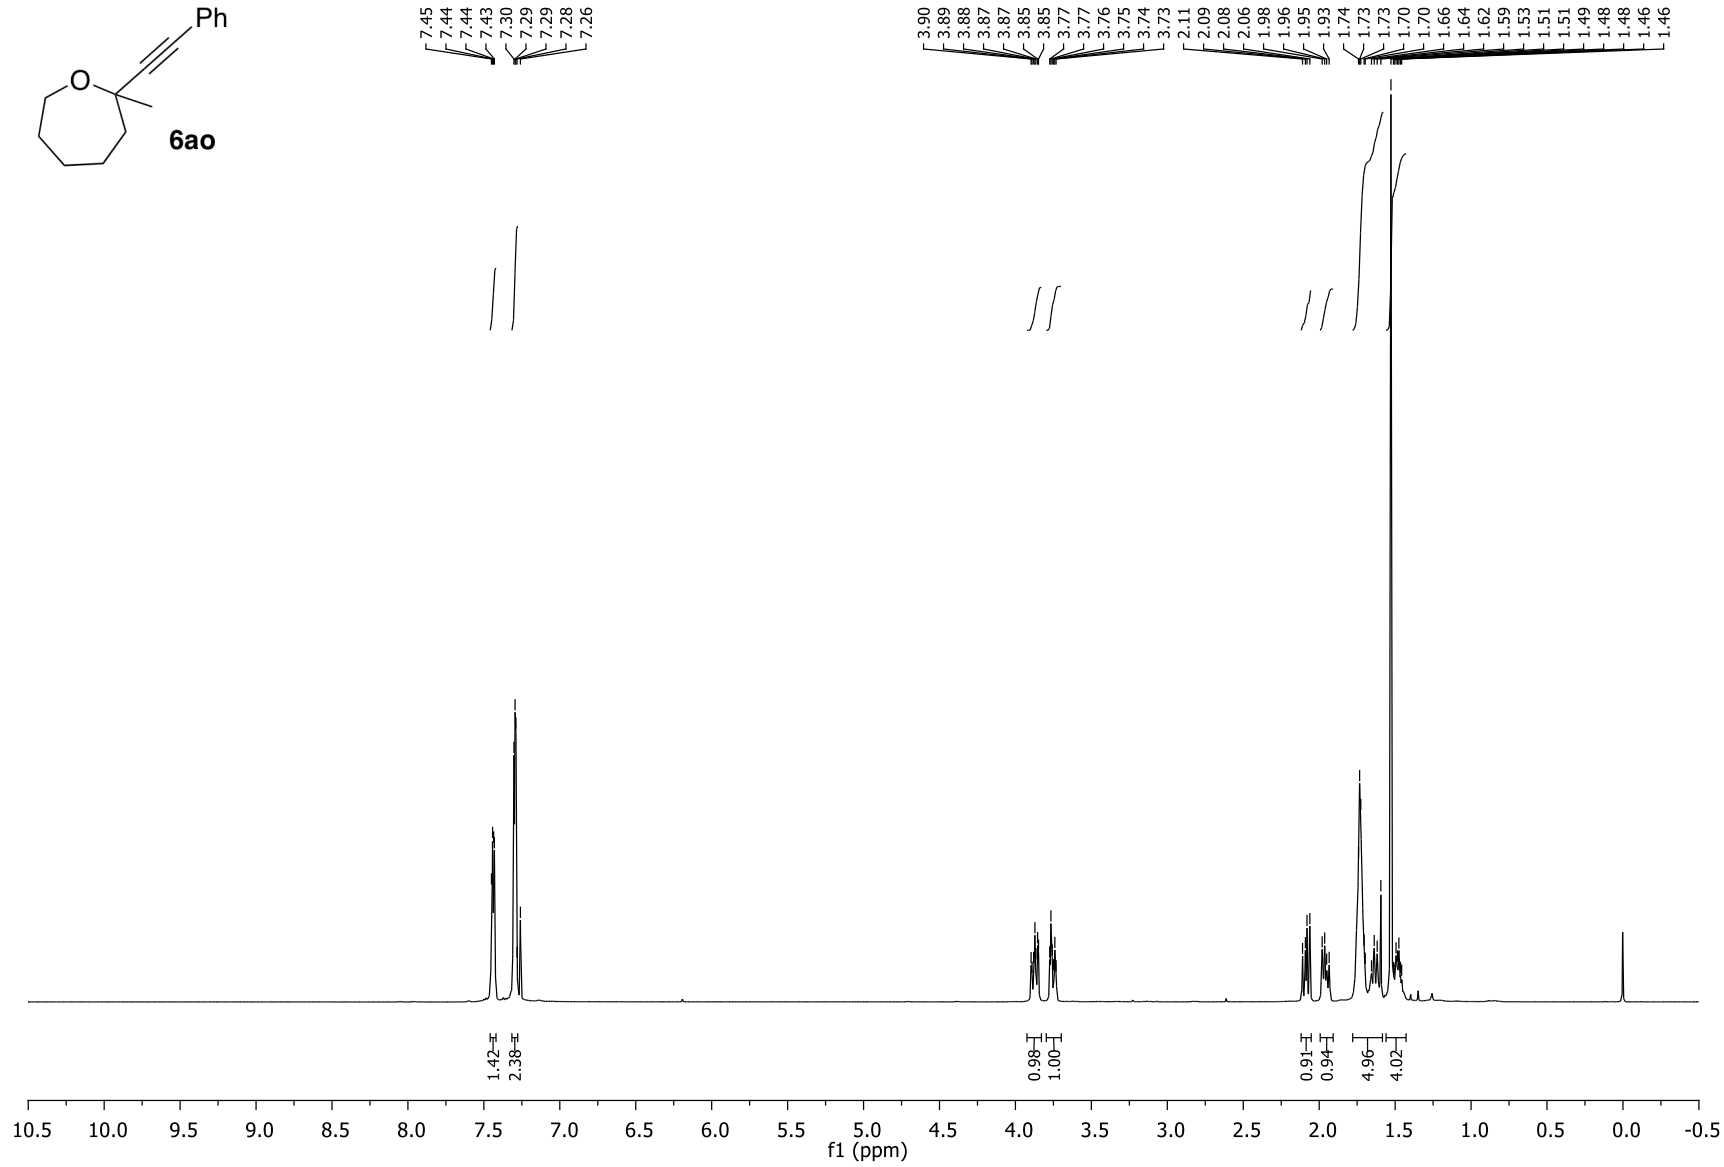

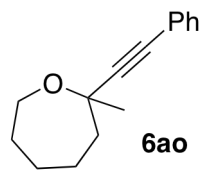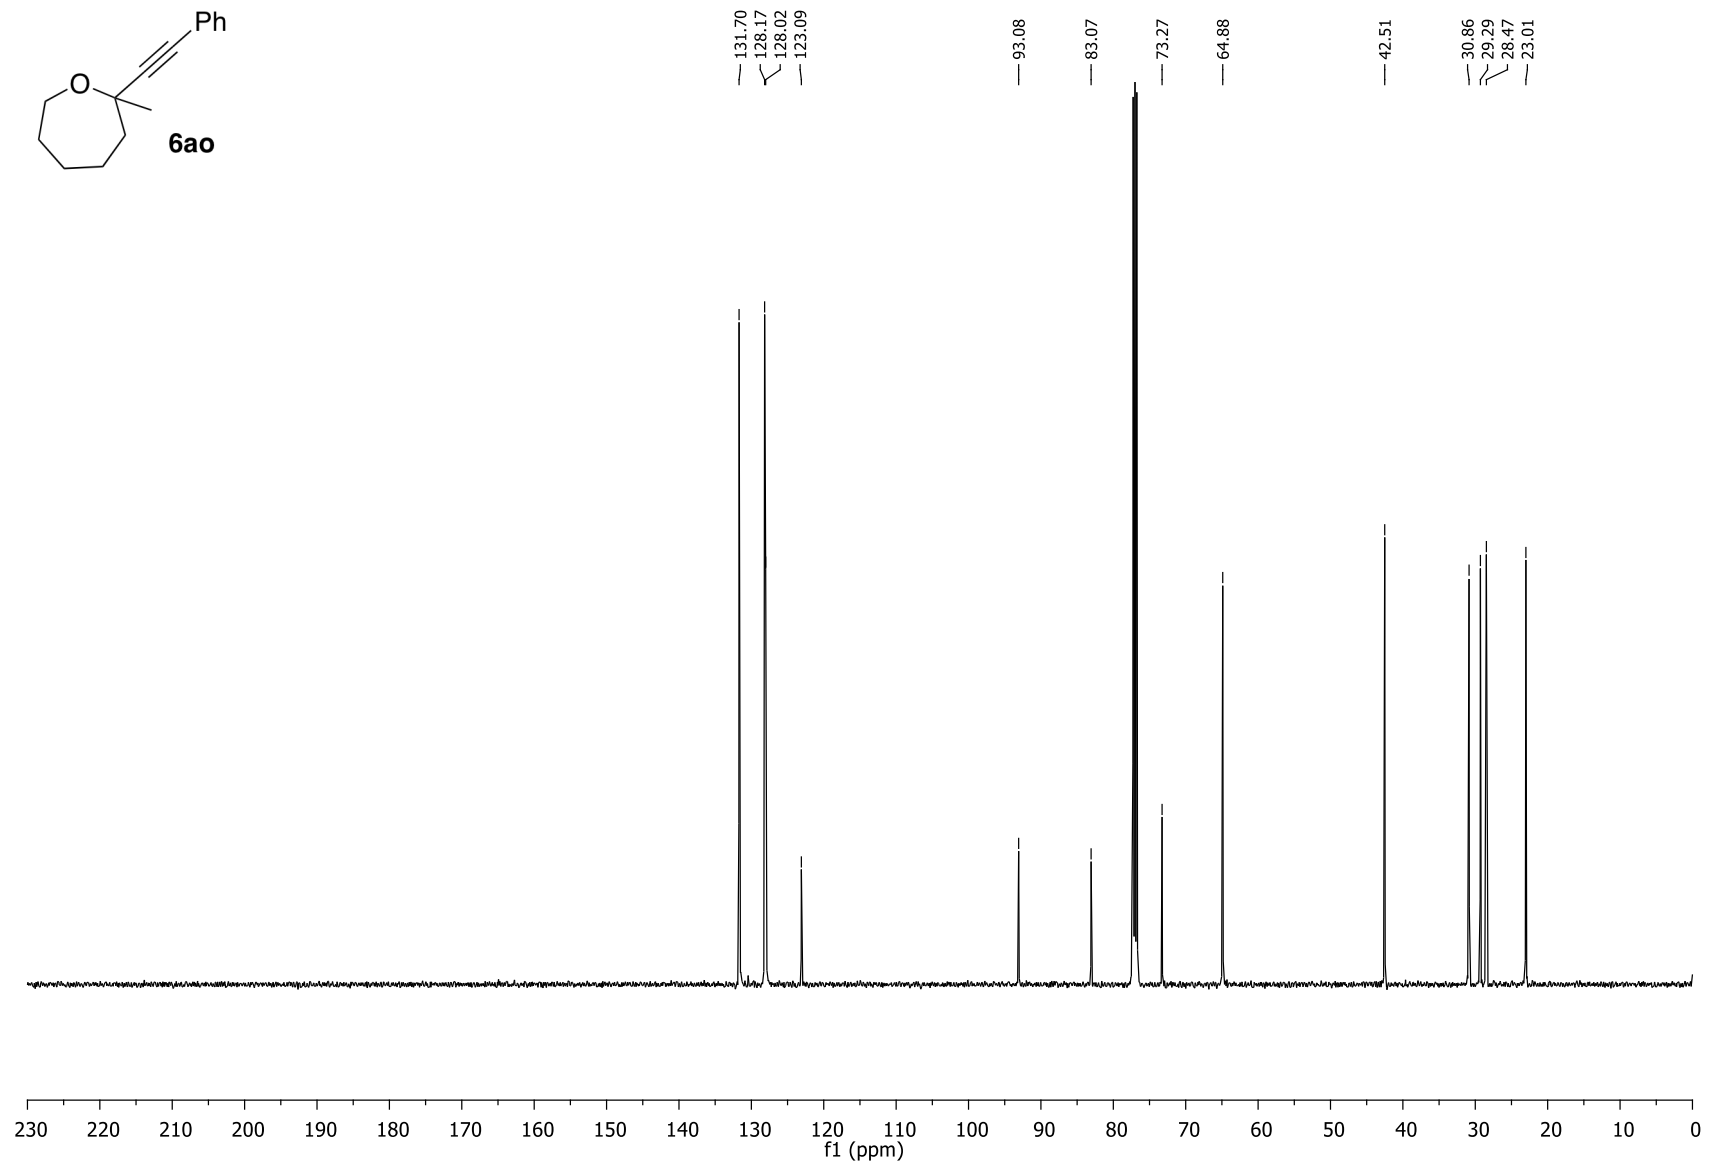



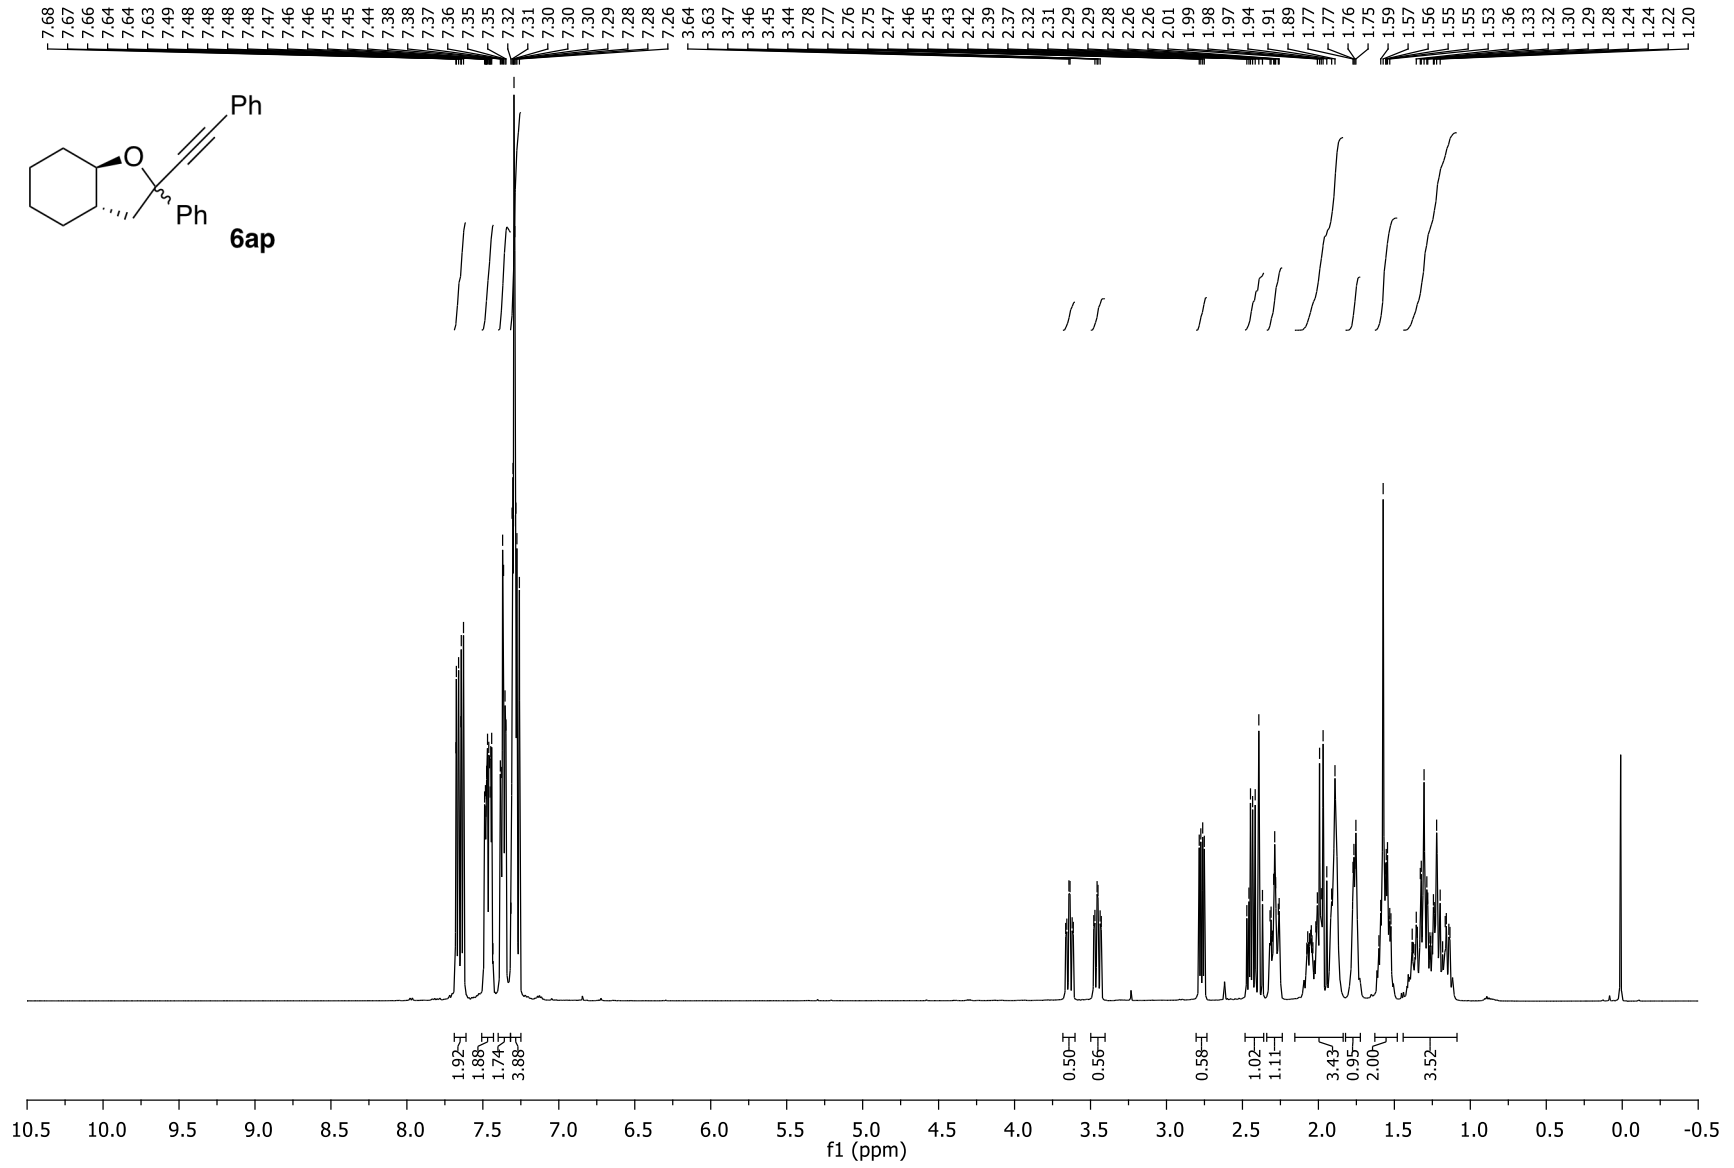

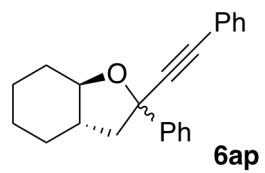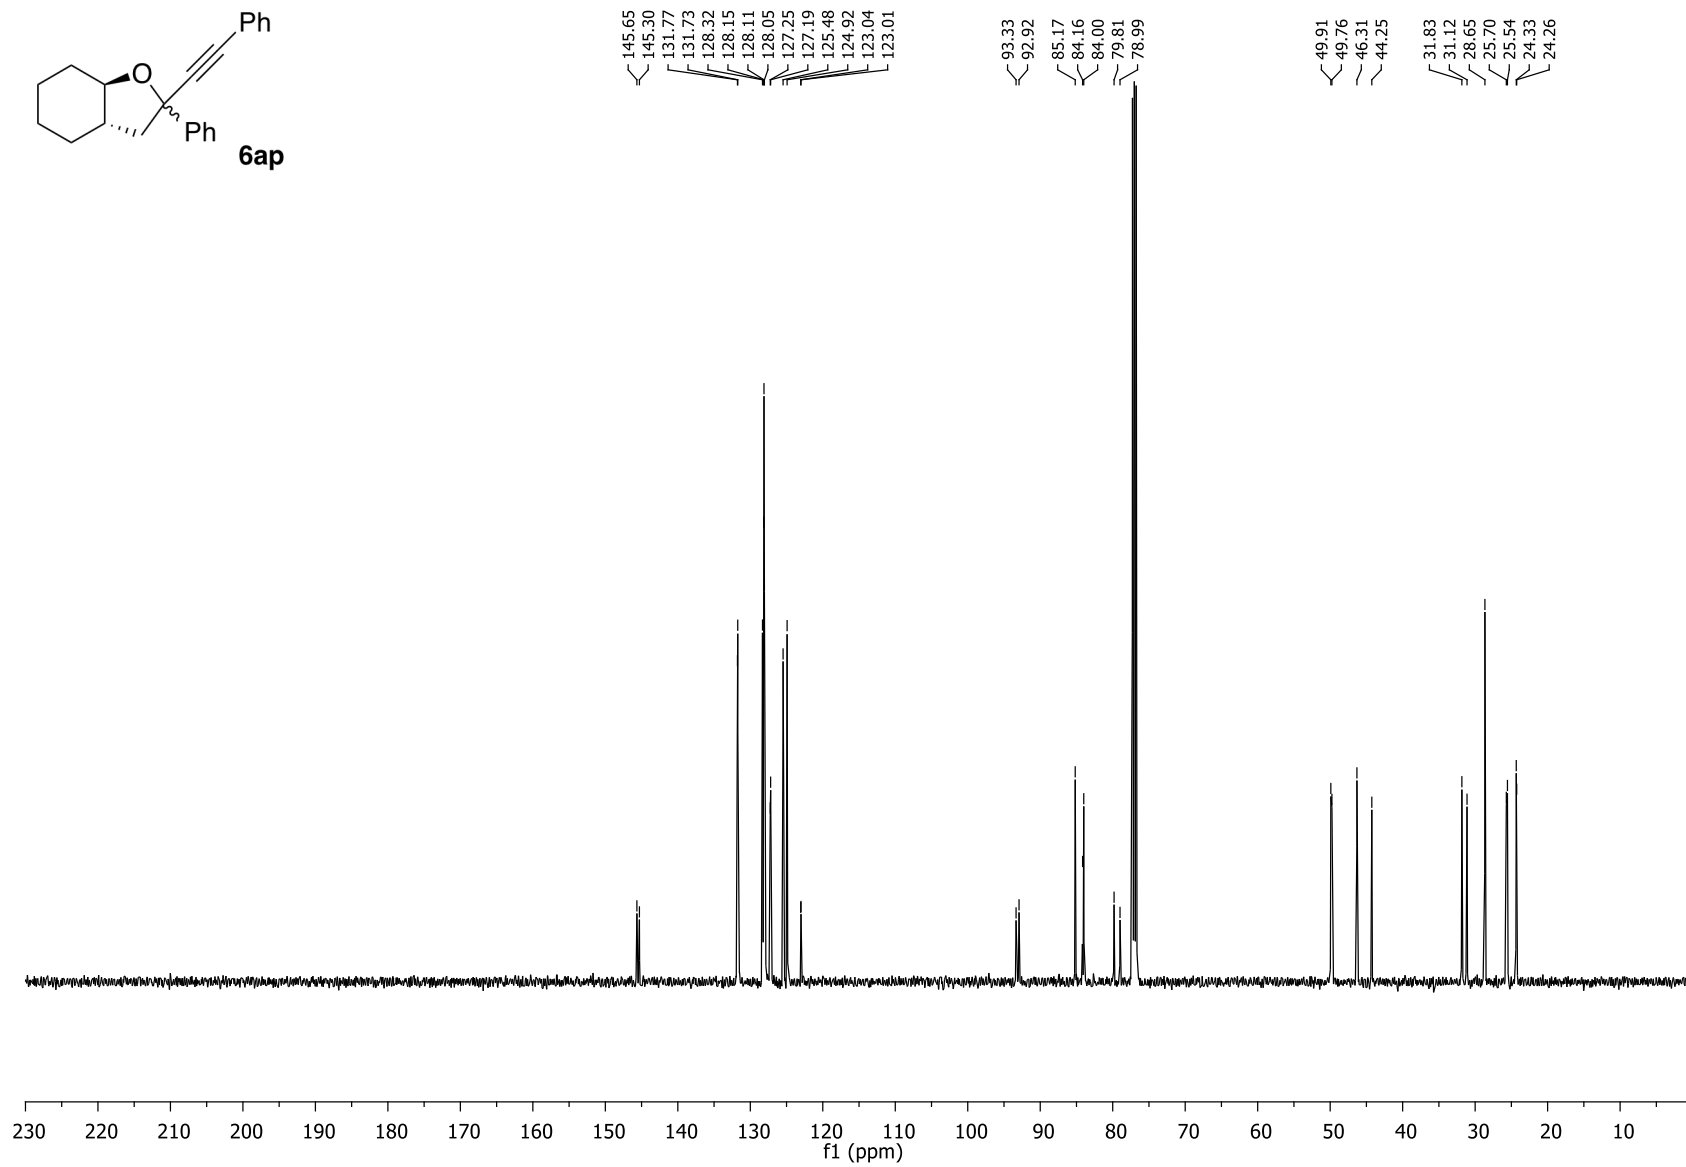

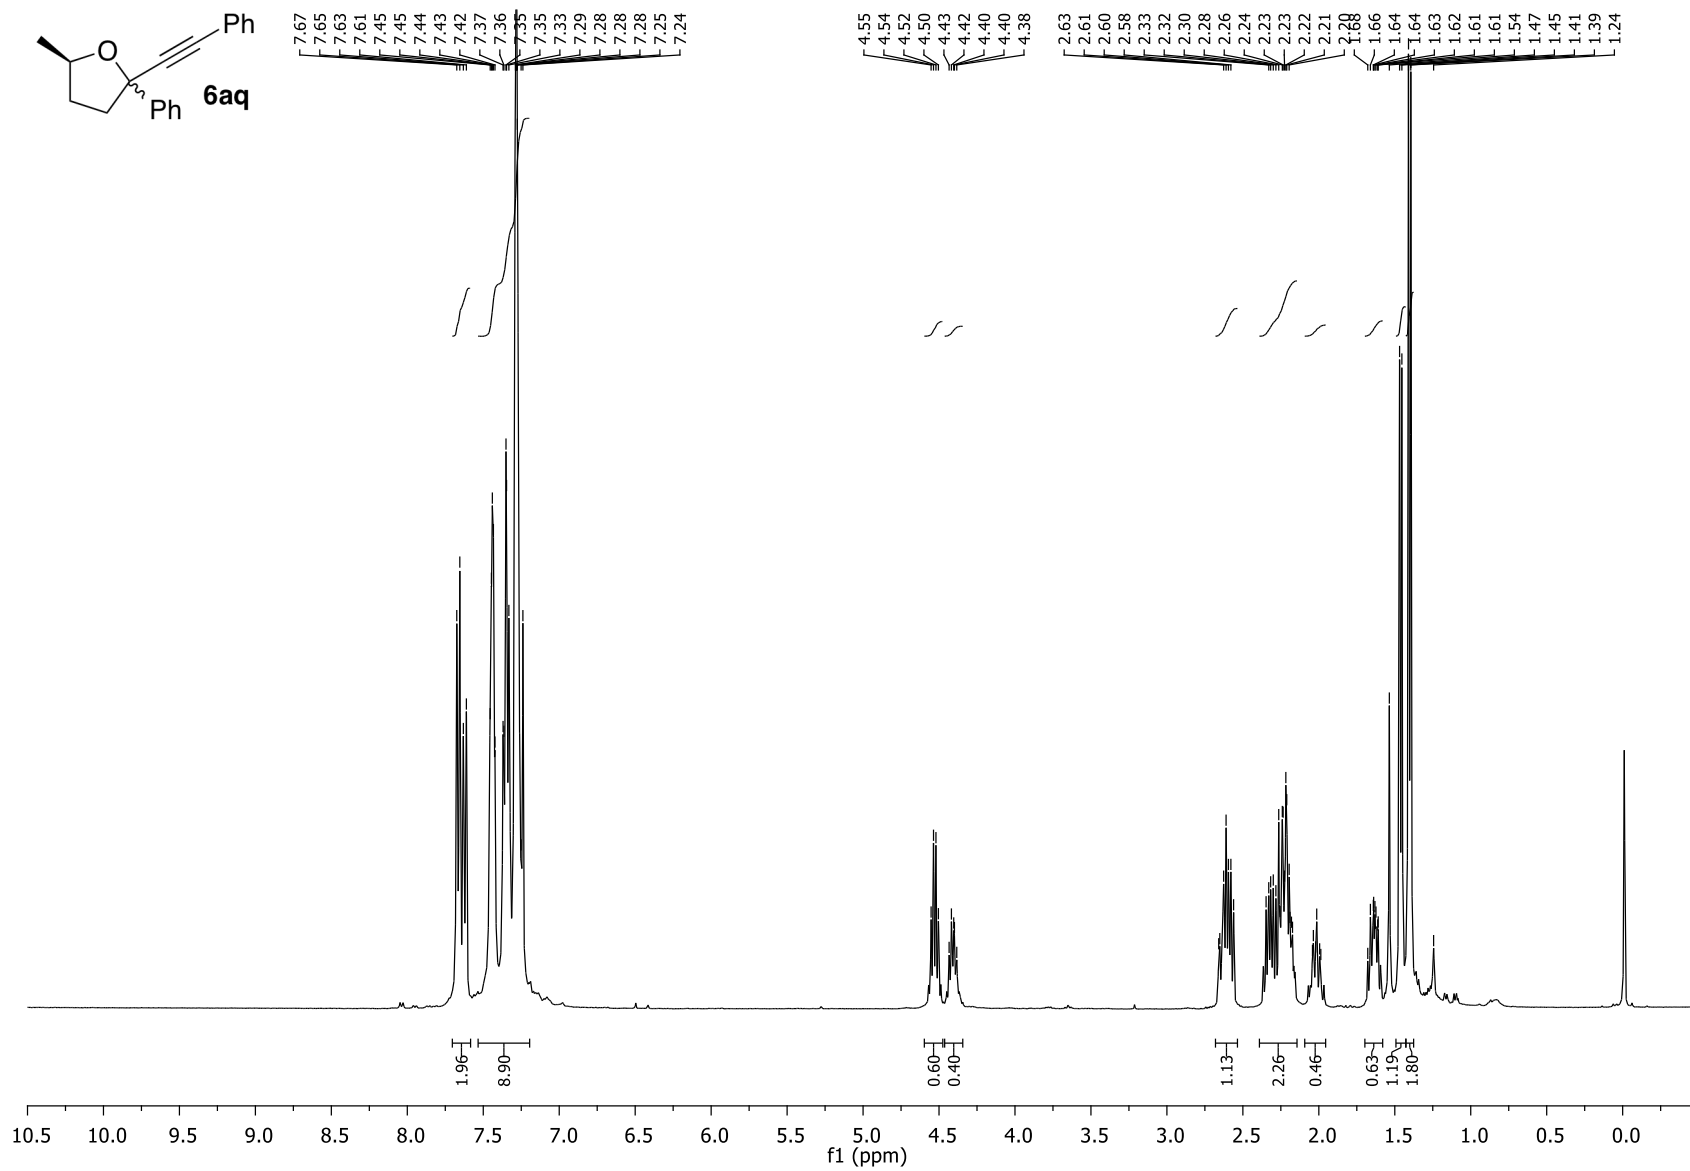

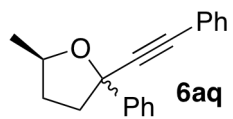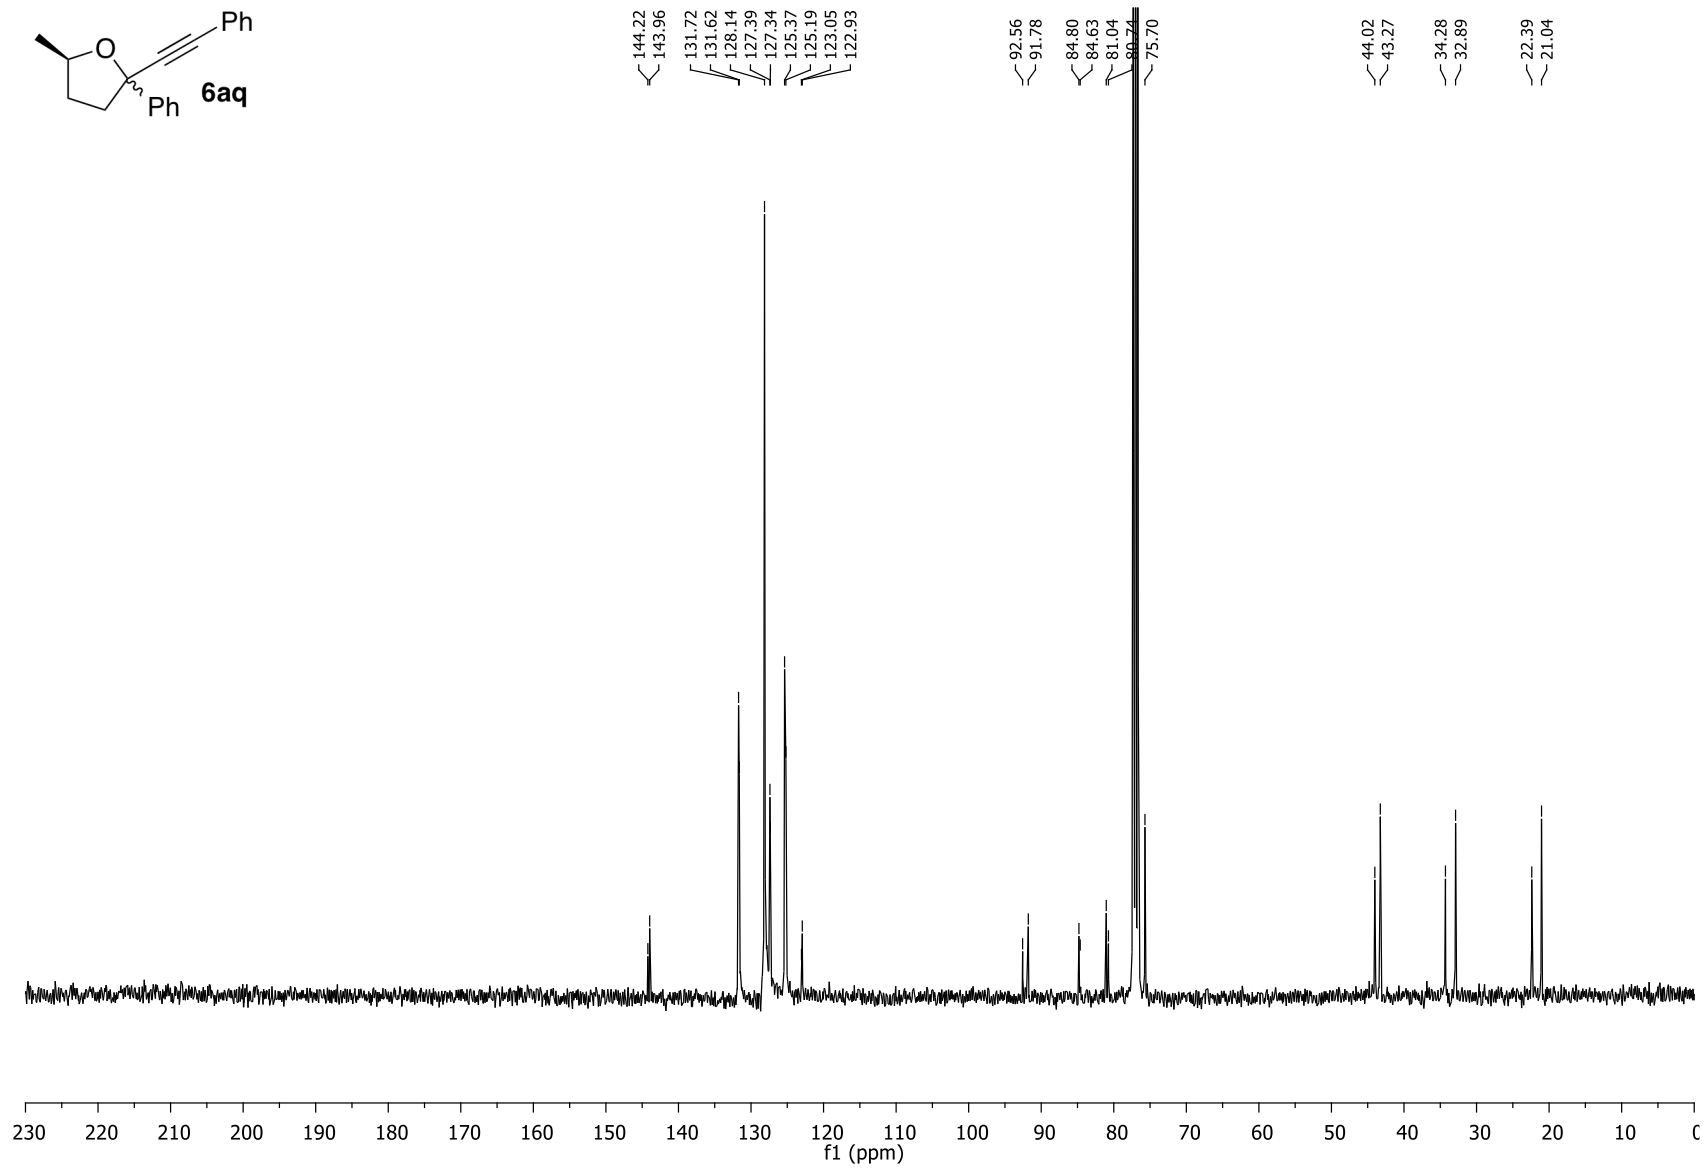

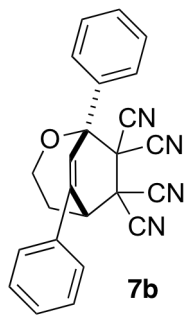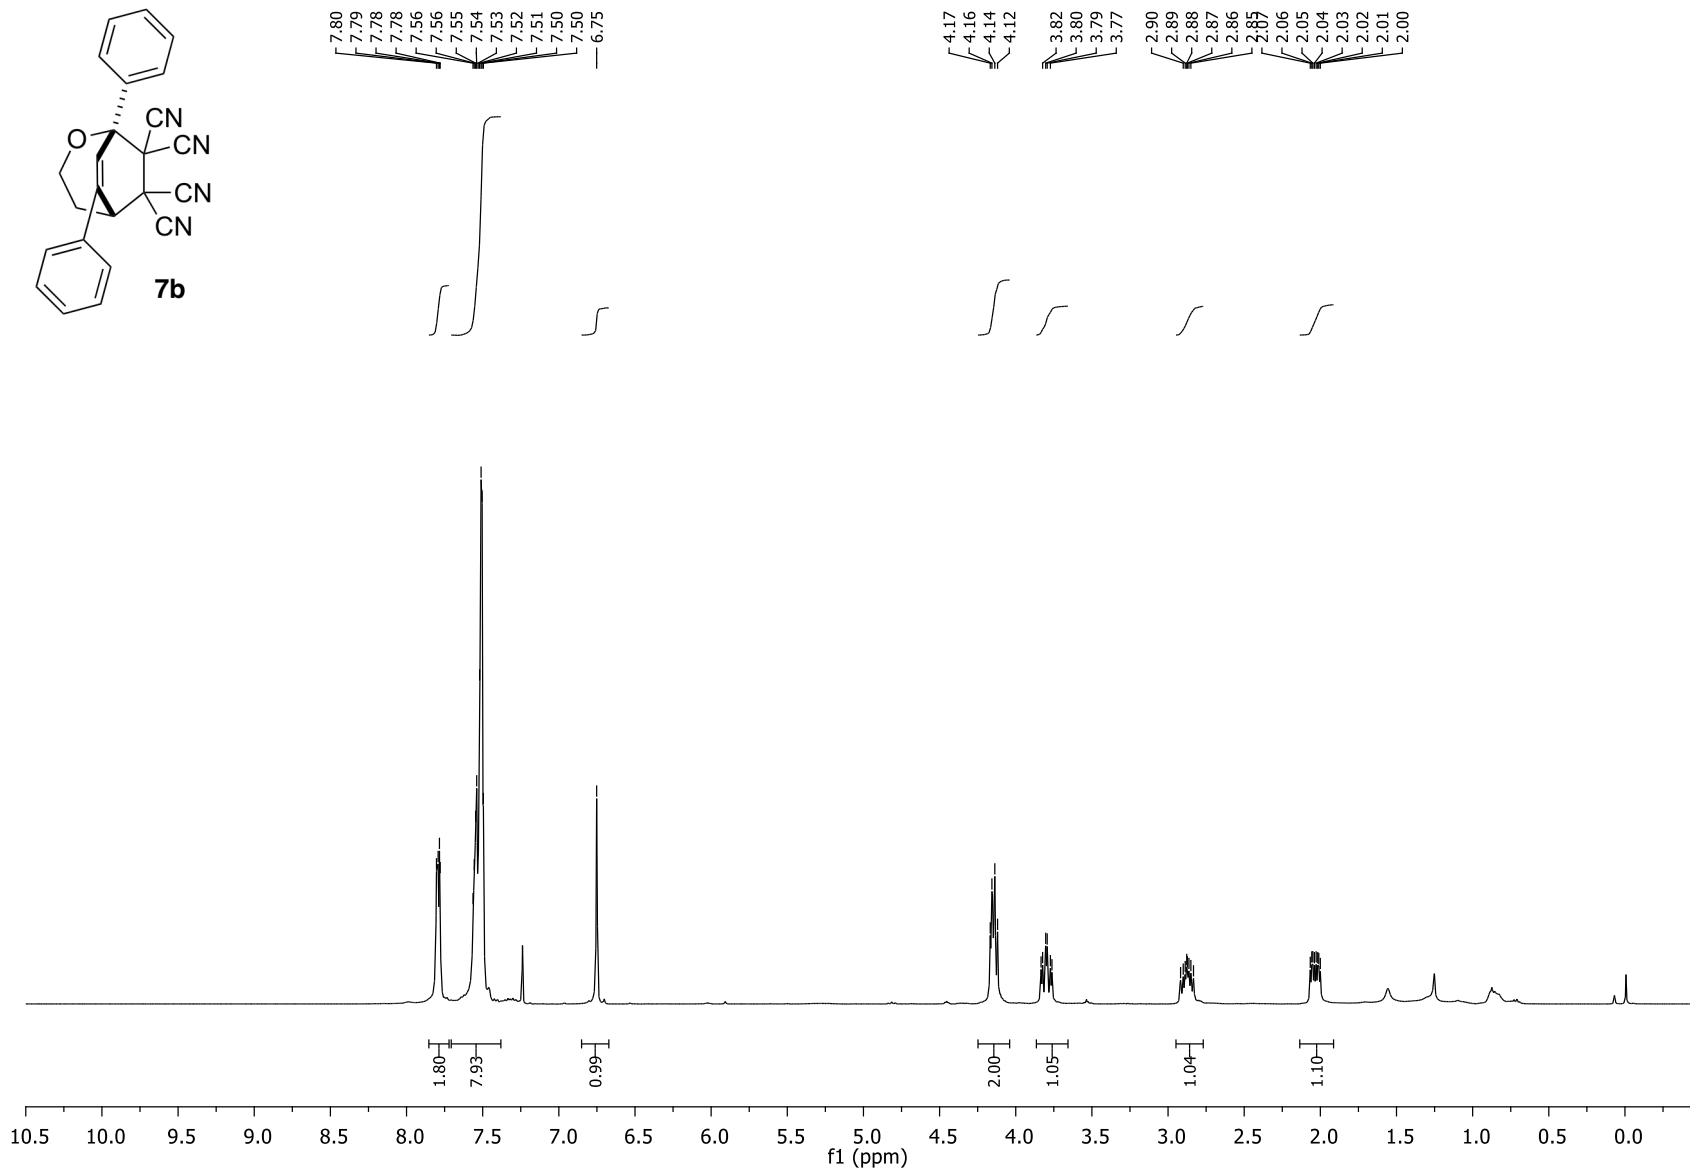

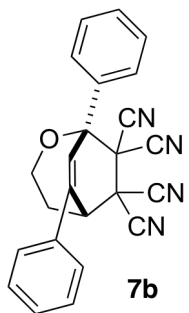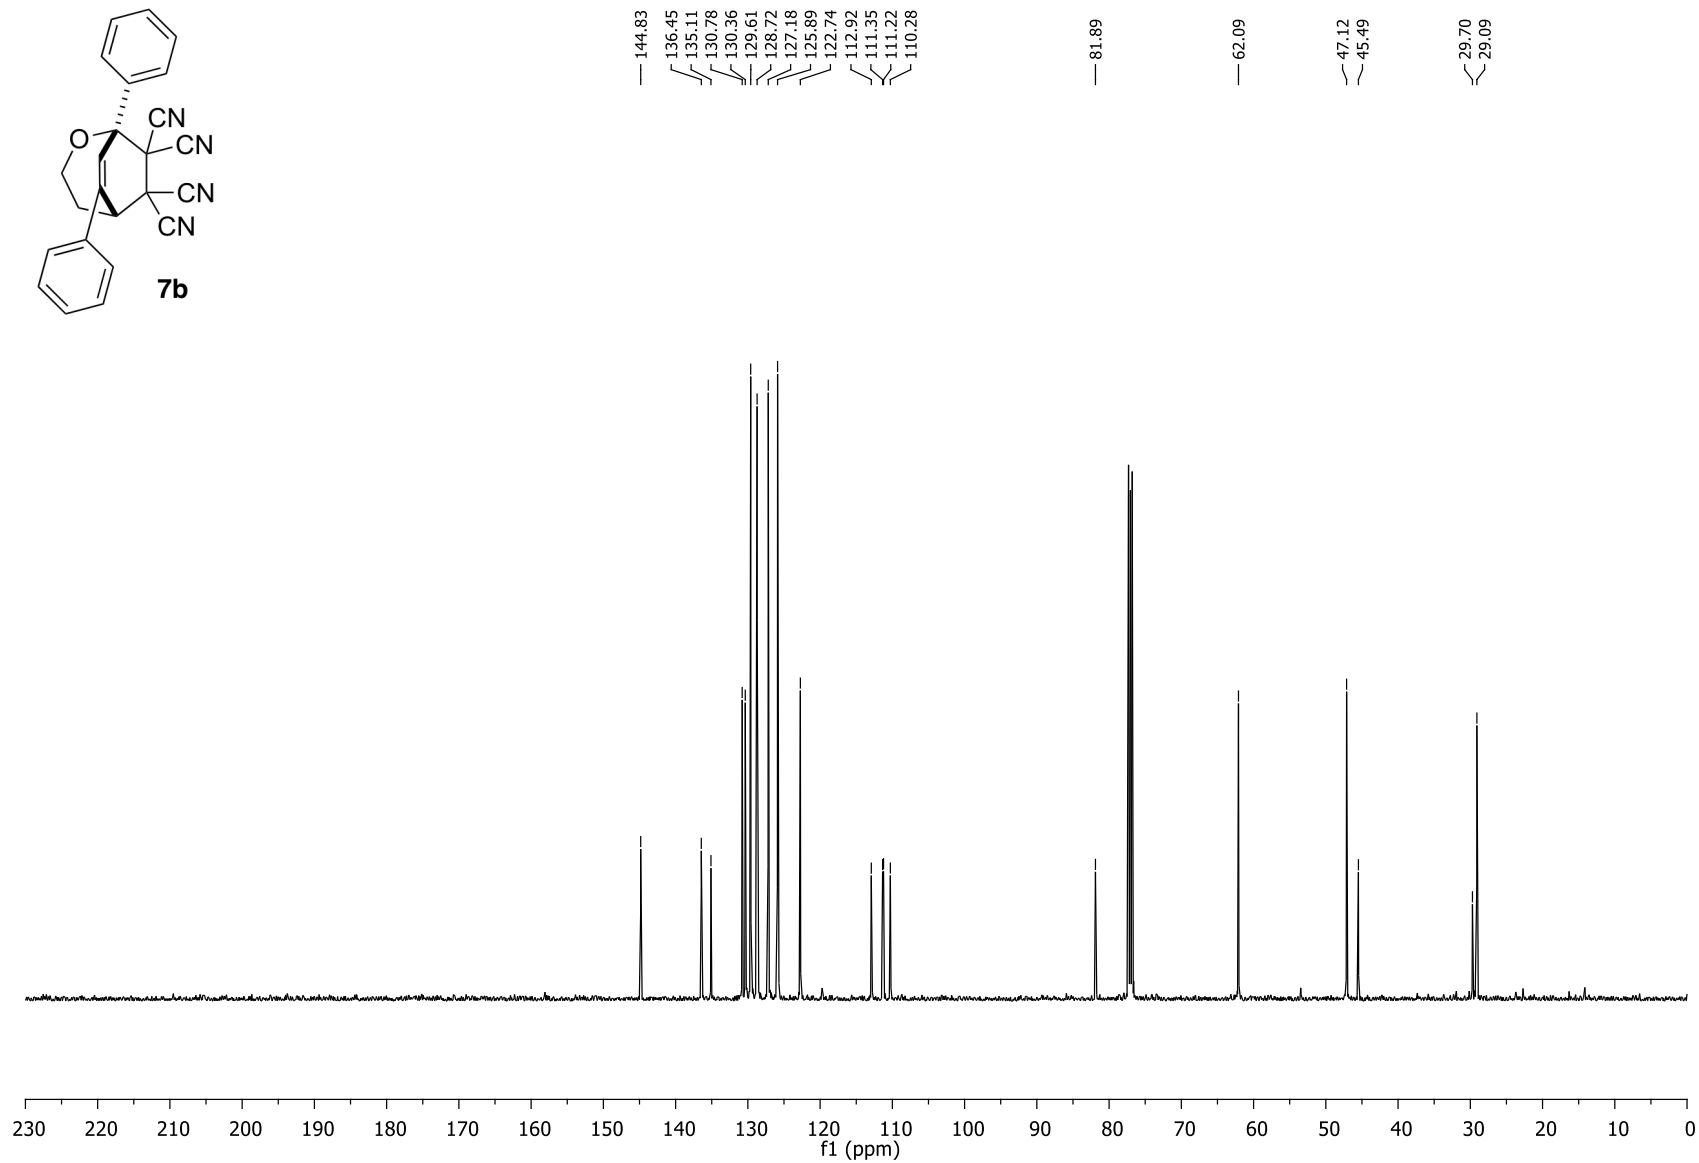

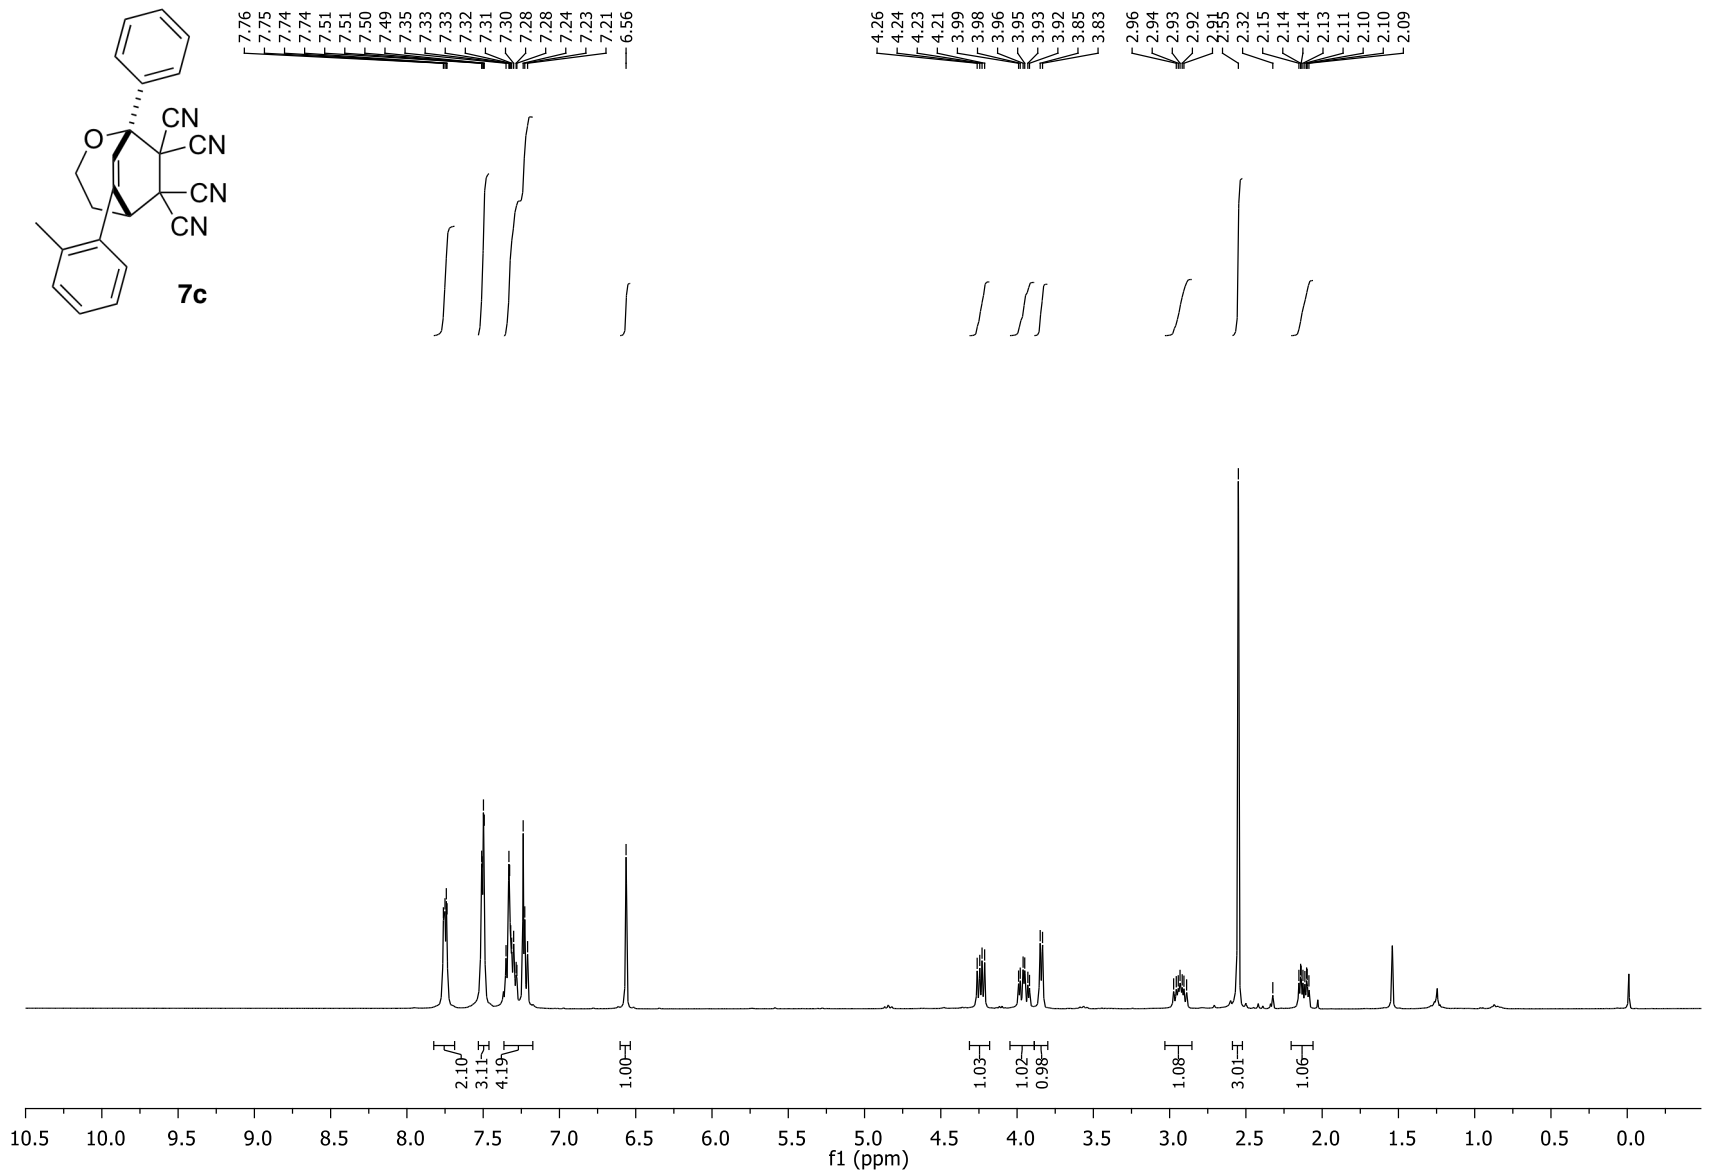

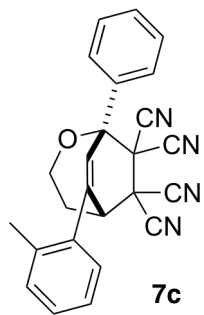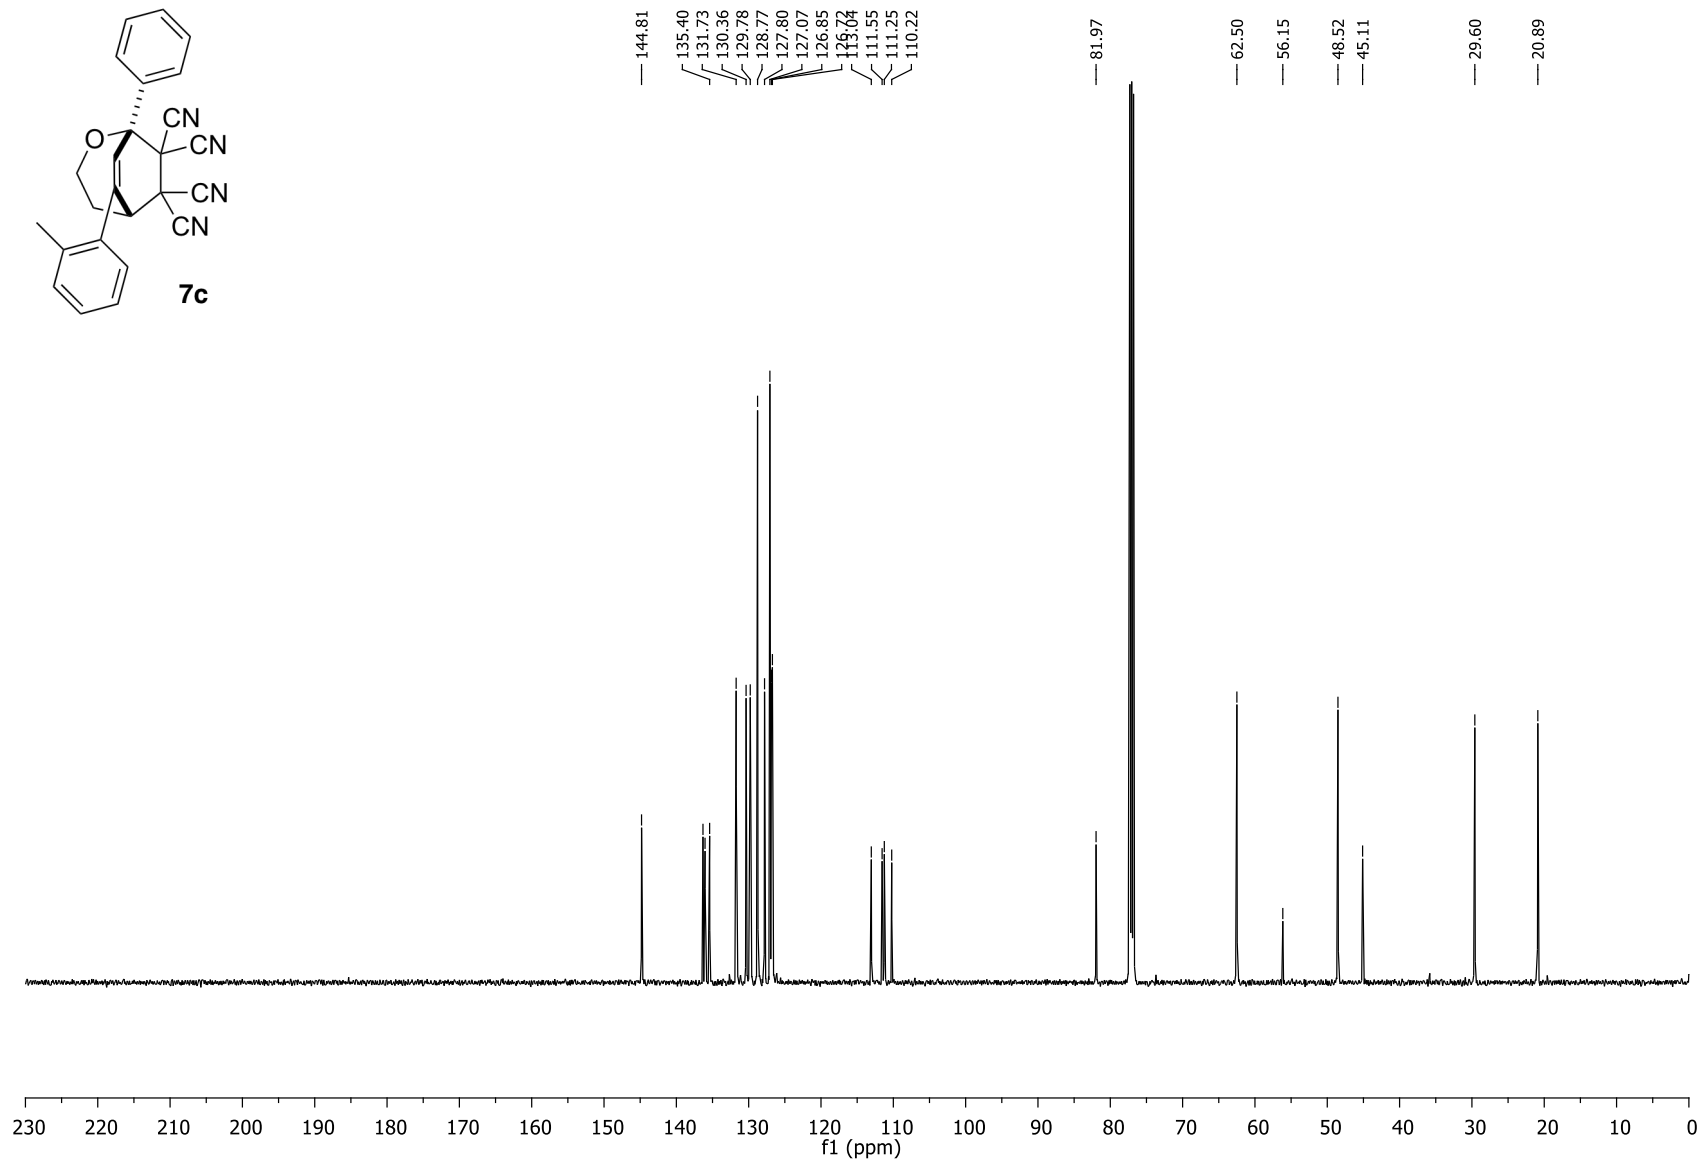



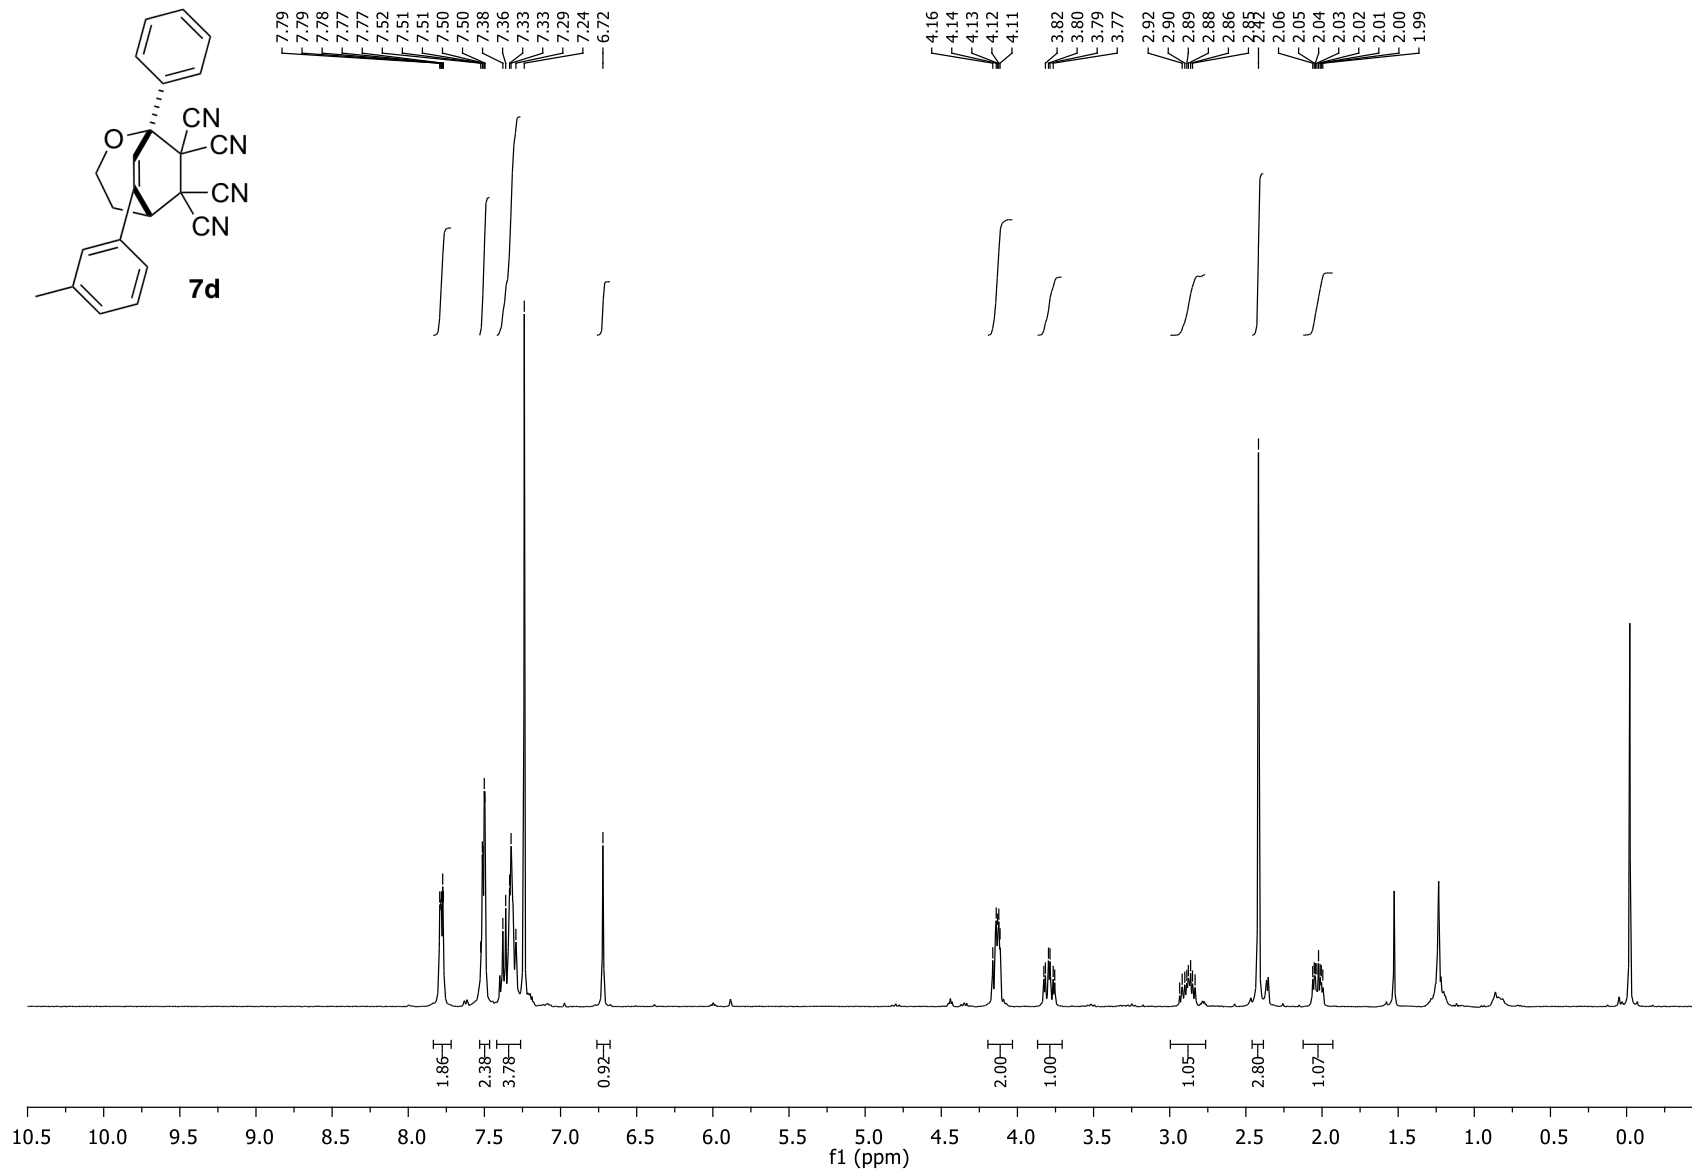

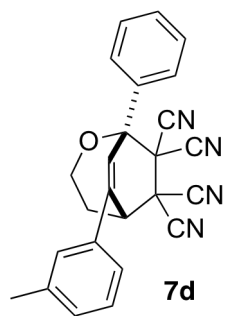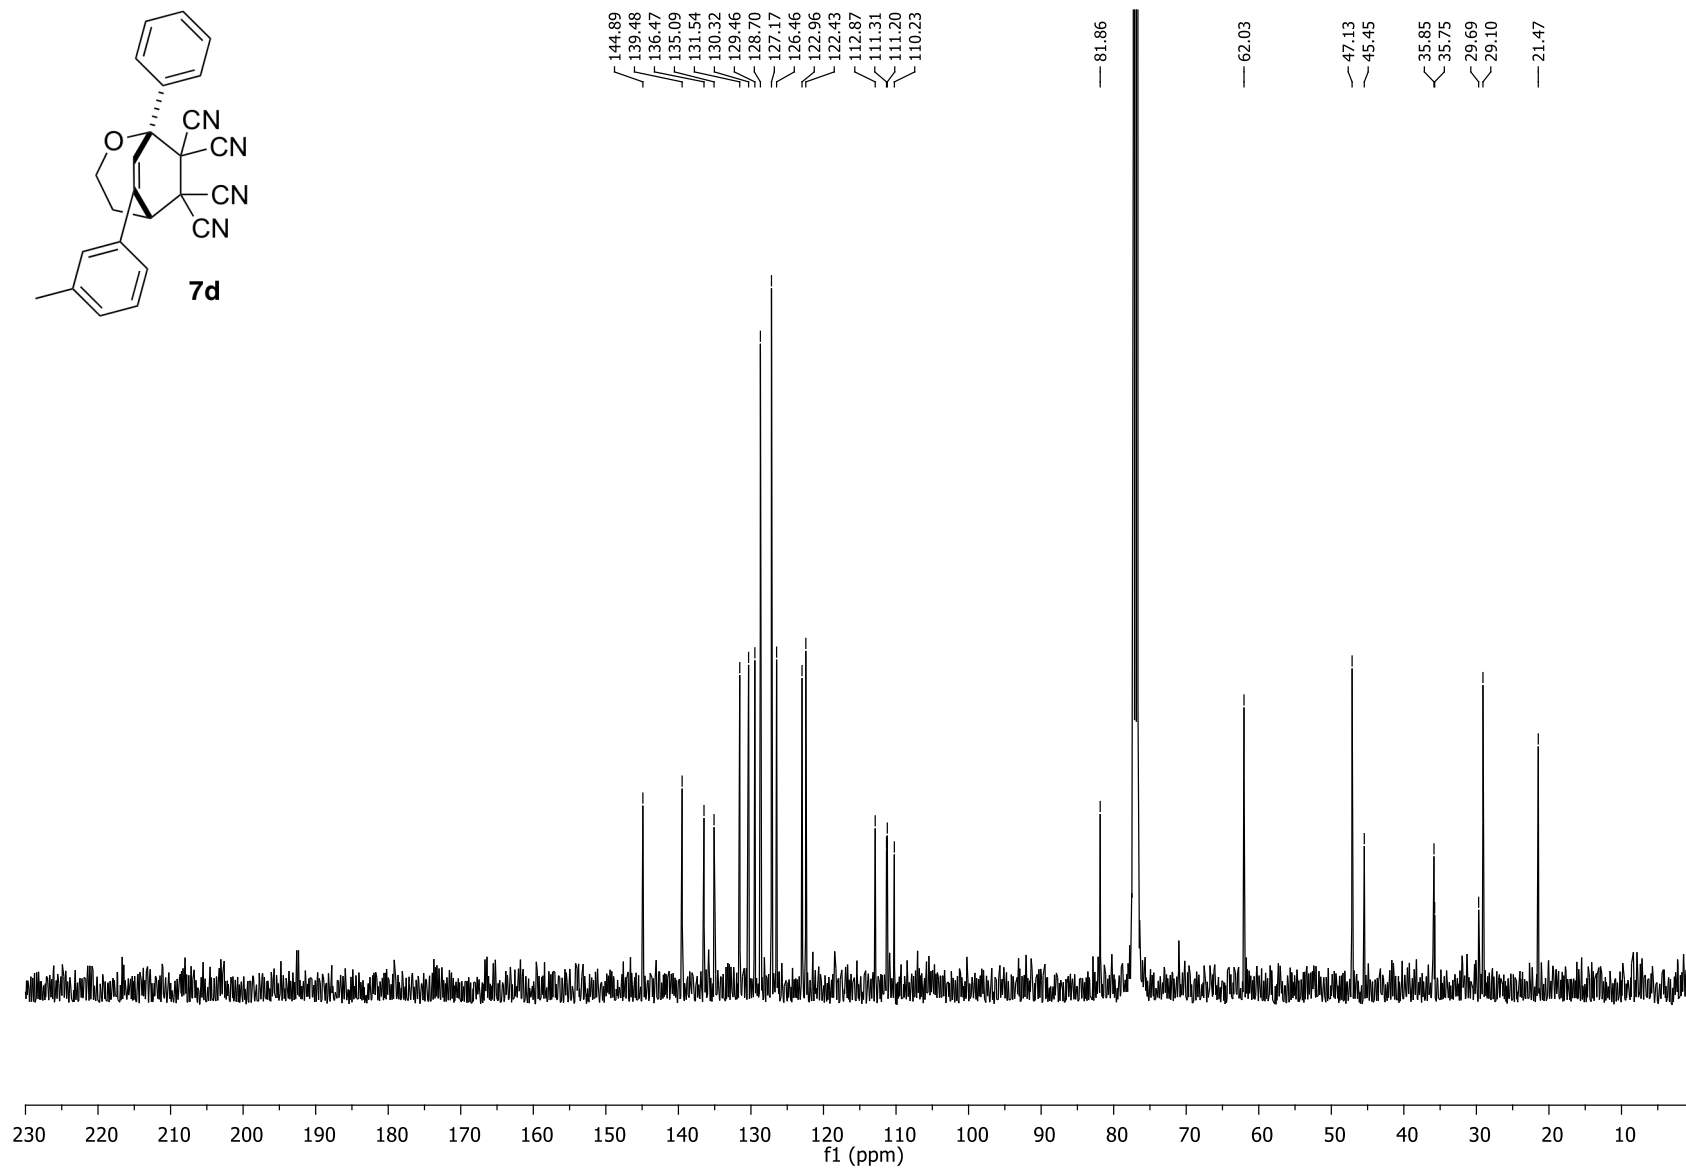

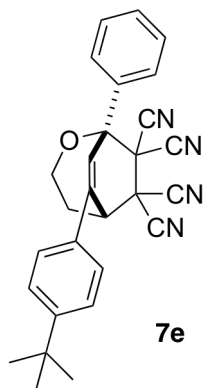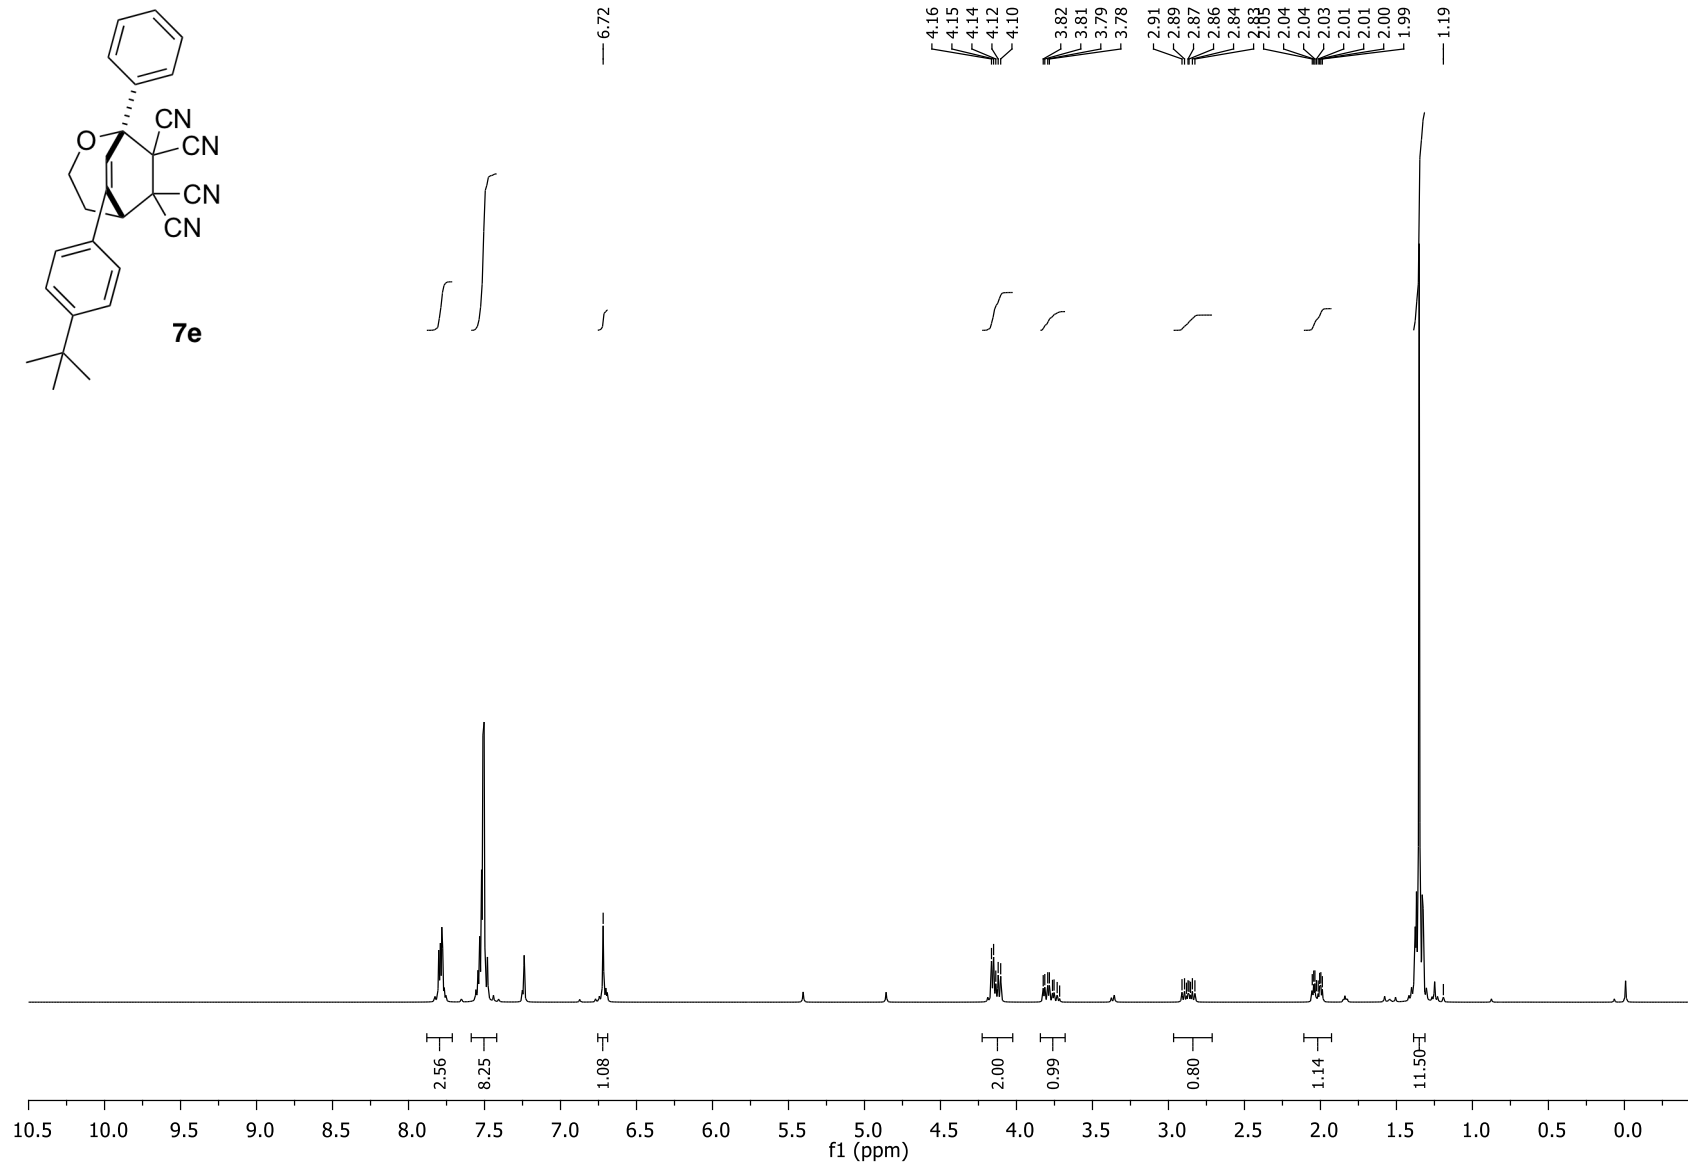

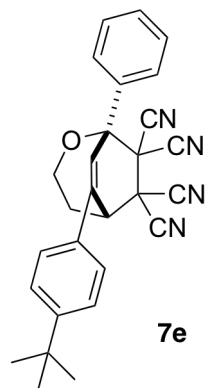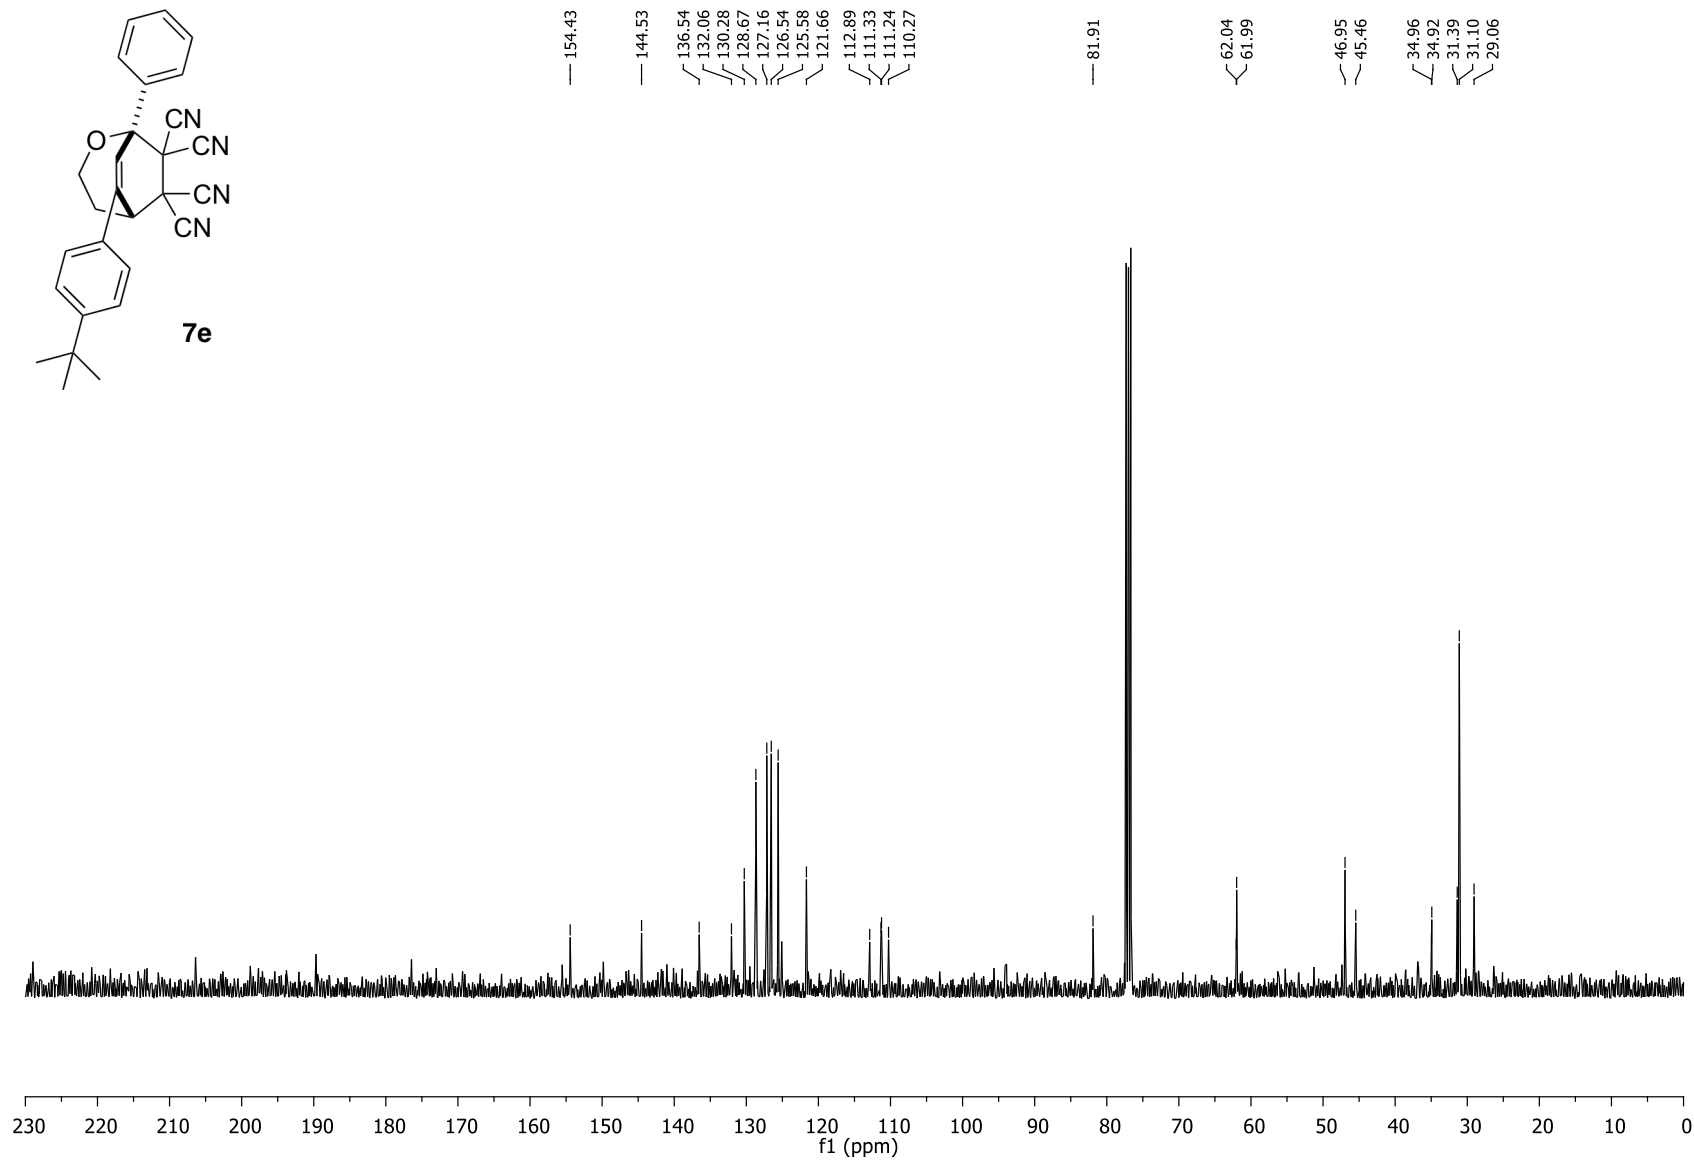

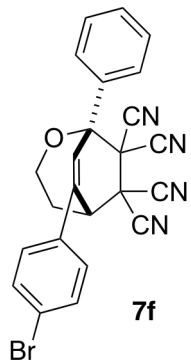

7.80  
7.79  
7.78  
7.66  
7.64  
7.54  
7.52  
7.44  
7.42  
— 6.78

4.18  
4.17  
4.16  
4.15  
4.12  
4.11

3.80  
3.78  
3.77  
3.76

2.91  
2.90  
2.89  
2.87  
2.86  
2.85  
2.86  
2.05  
2.04  
2.03  
2.02  
2.01  
2.00

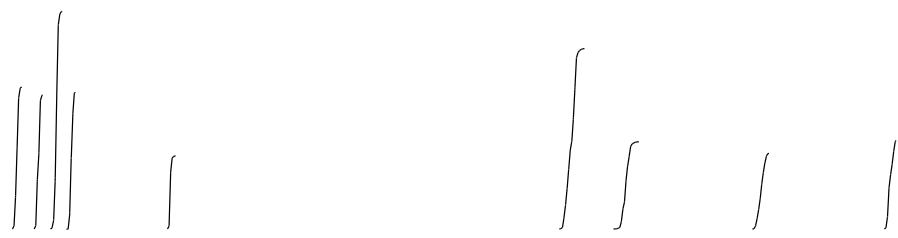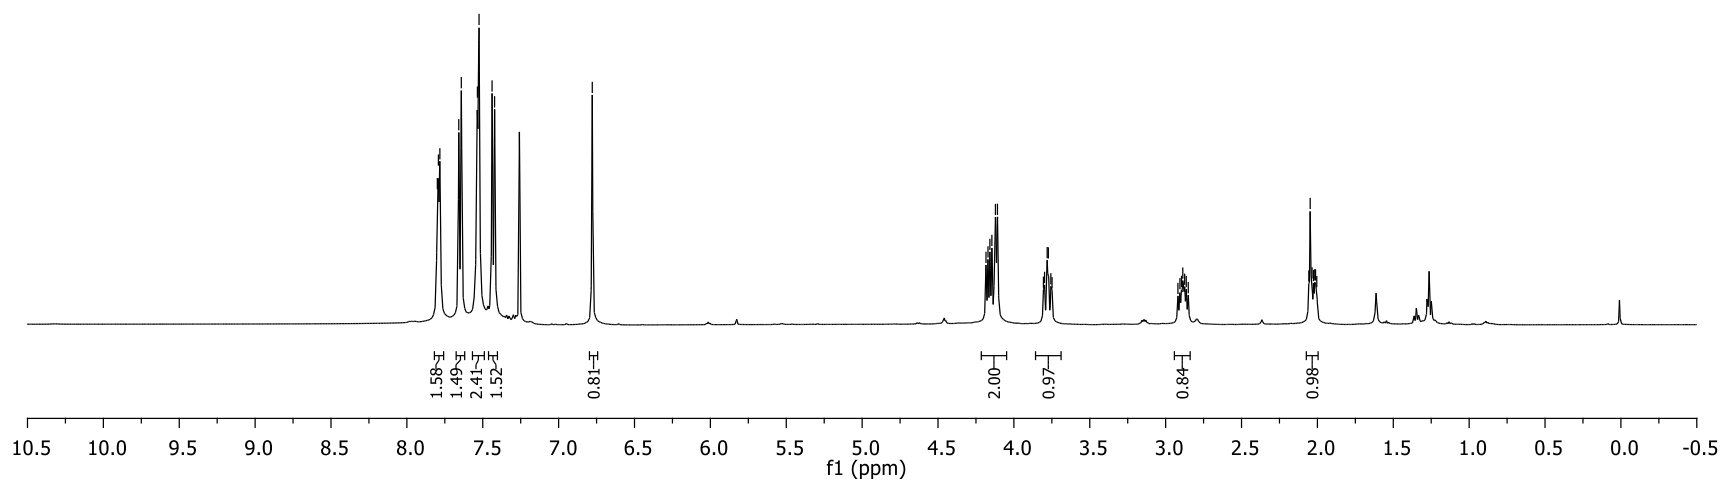

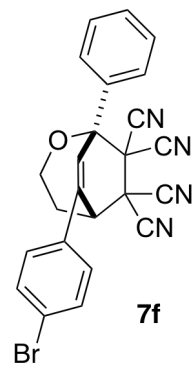

143.83  
136.24  
133.94  
132.85  
130.45  
128.77  
127.40  
127.13  
125.32  
123.32  
112.87  
111.28  
111.07  
110.15

81.85  
77.32  
77.07  
76.82

62.09  
56.23

46.98  
45.47

29.03

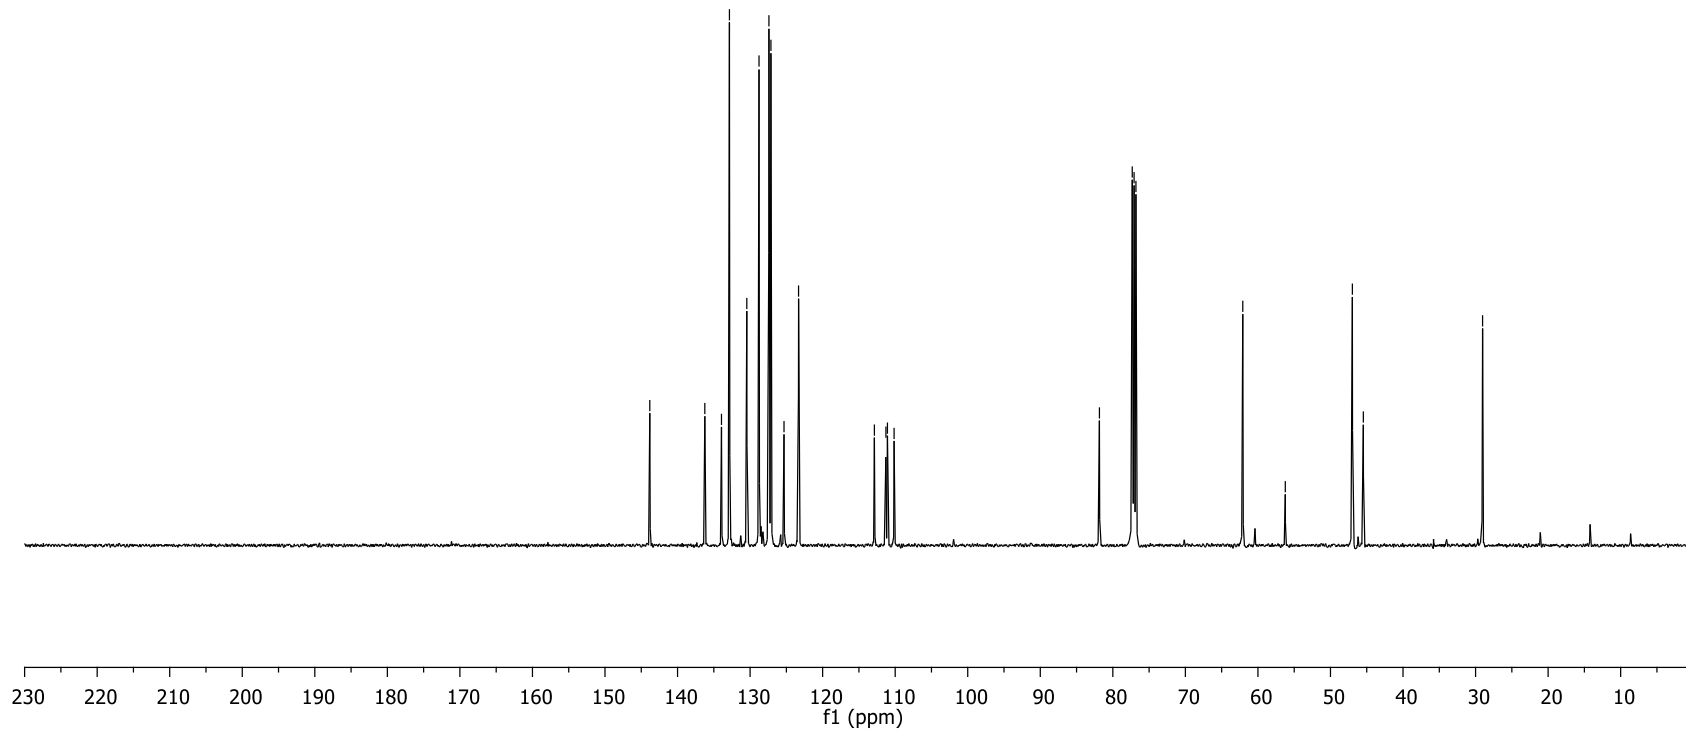

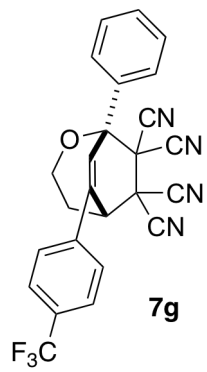

7.78  
7.76  
7.67  
7.65  
7.53  
7.52  
7.51  
7.24  
— 6.84

4.21  
4.19  
4.18  
4.16  
4.14  
4.12  
3.81  
3.79  
3.78  
3.76  
2.94  
2.93  
2.92  
2.90  
2.89  
2.87  
2.87  
2.06  
2.06  
2.04  
2.03  
2.02  
2.02  
2.01

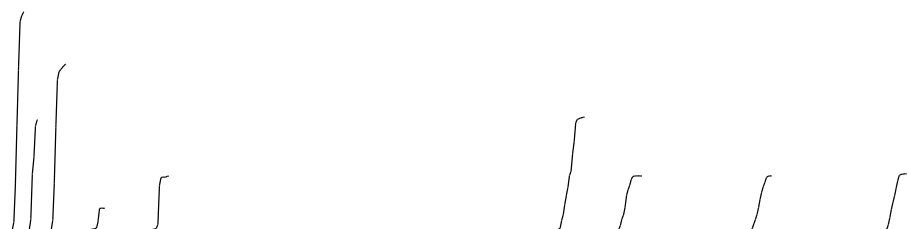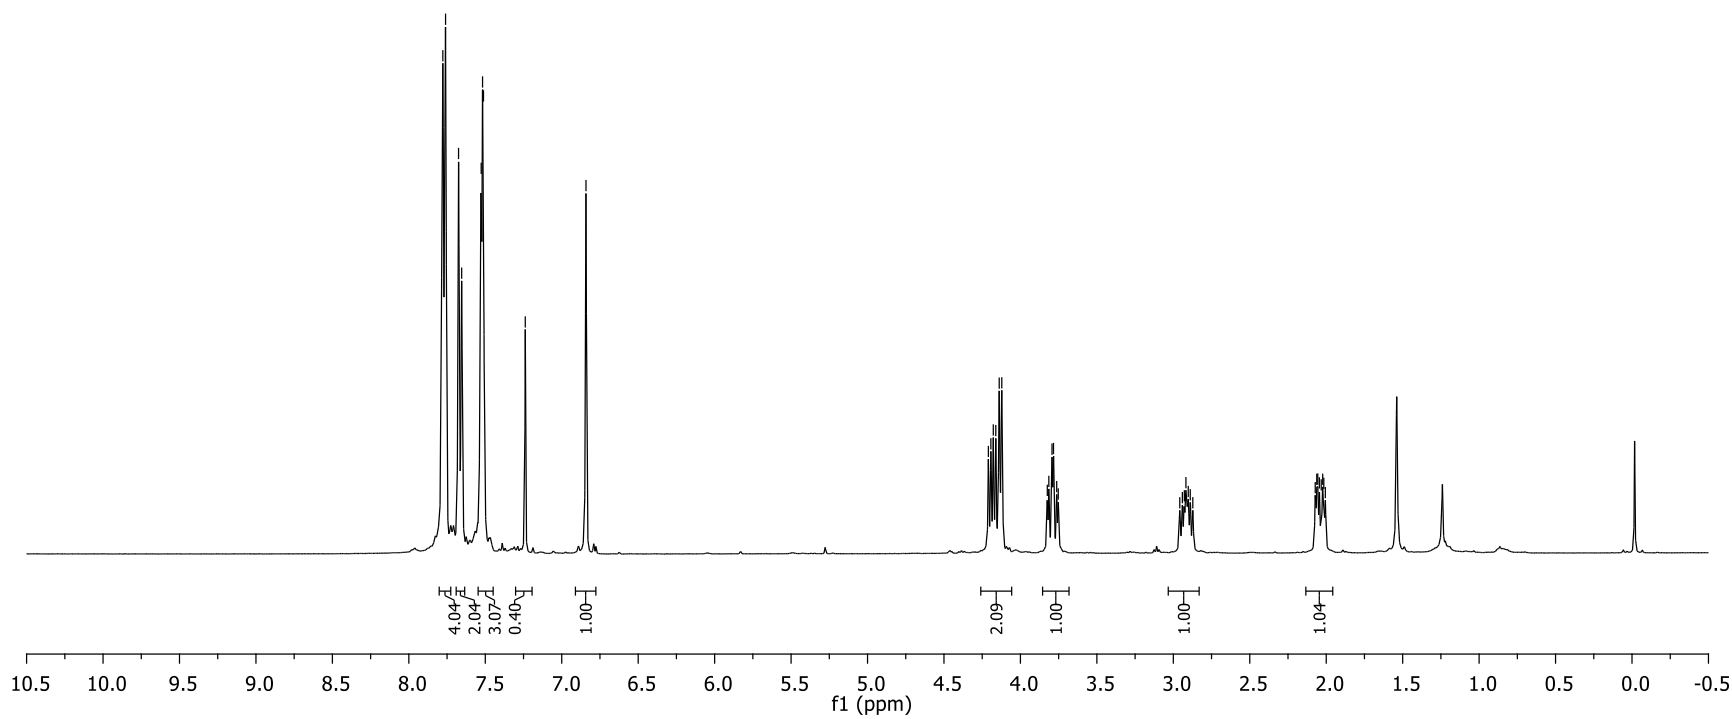

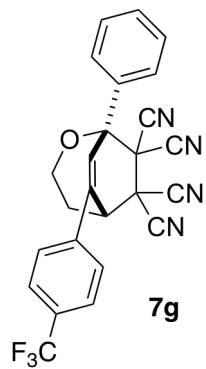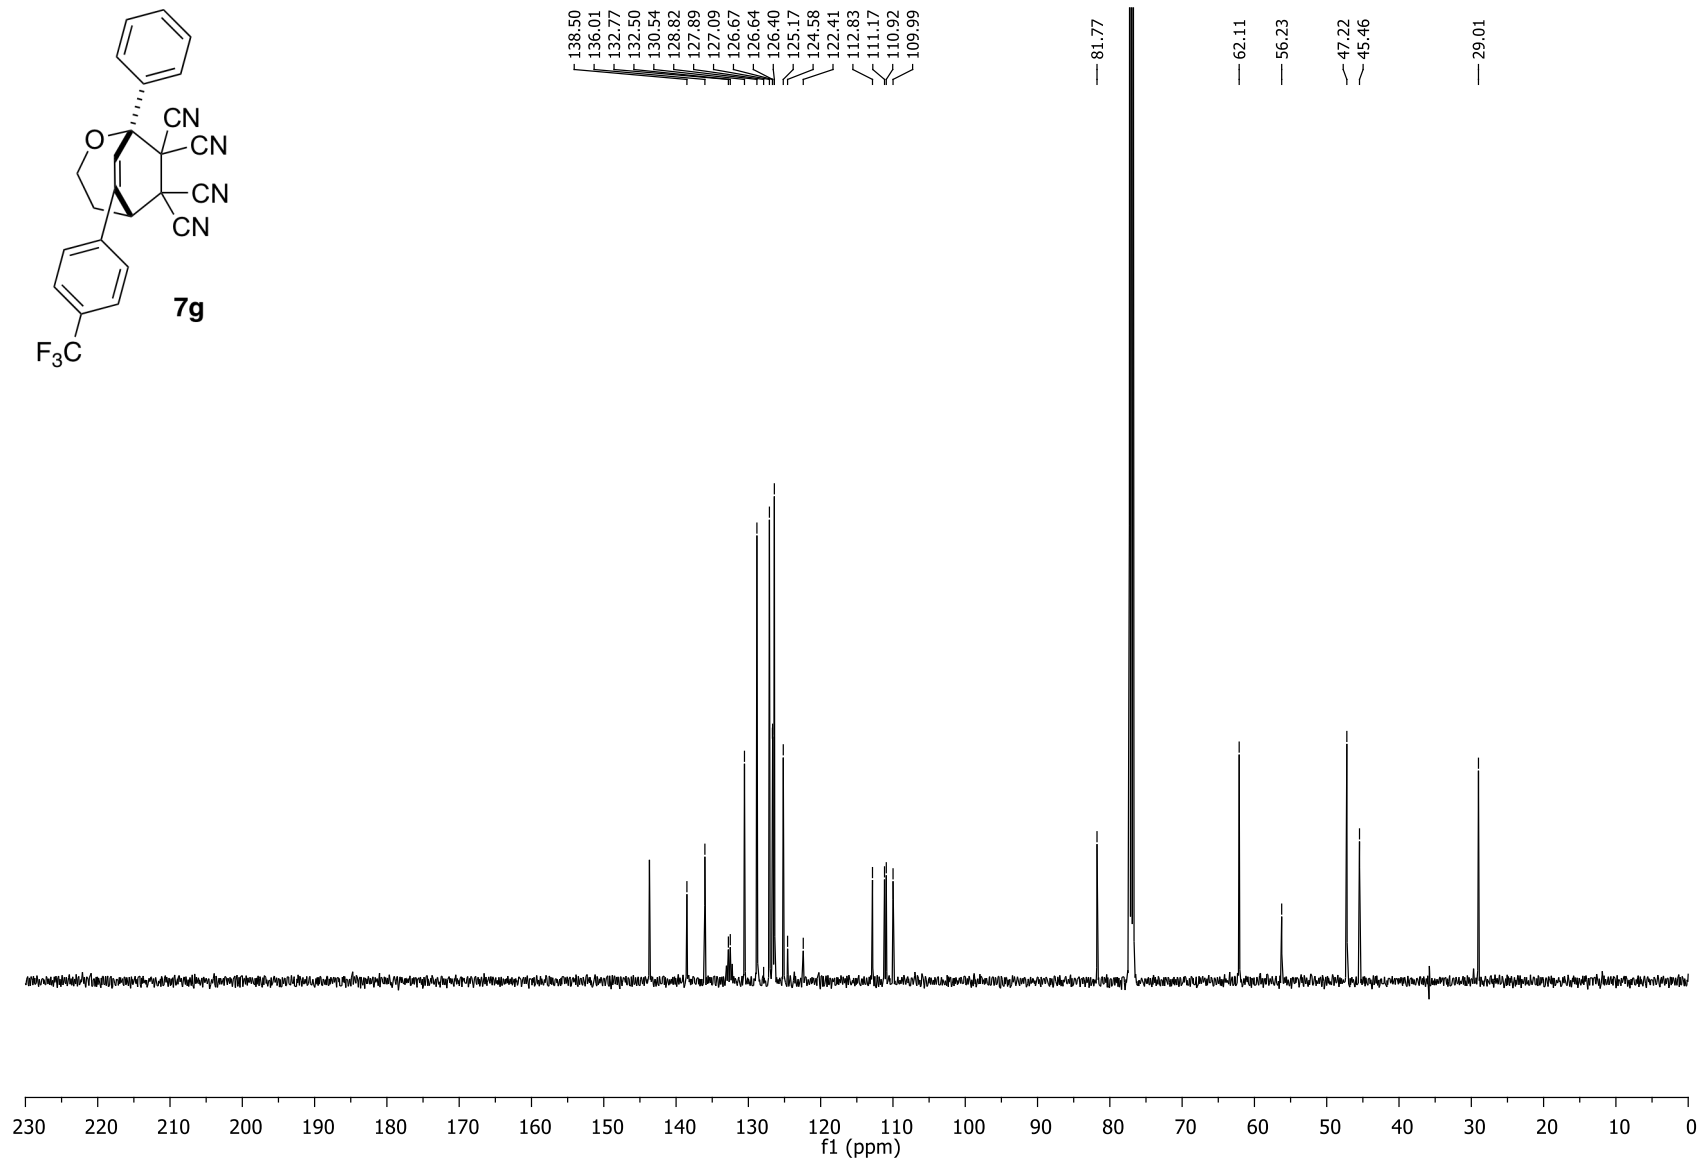



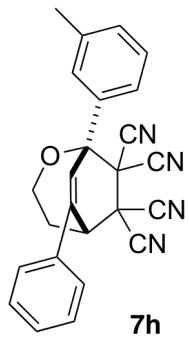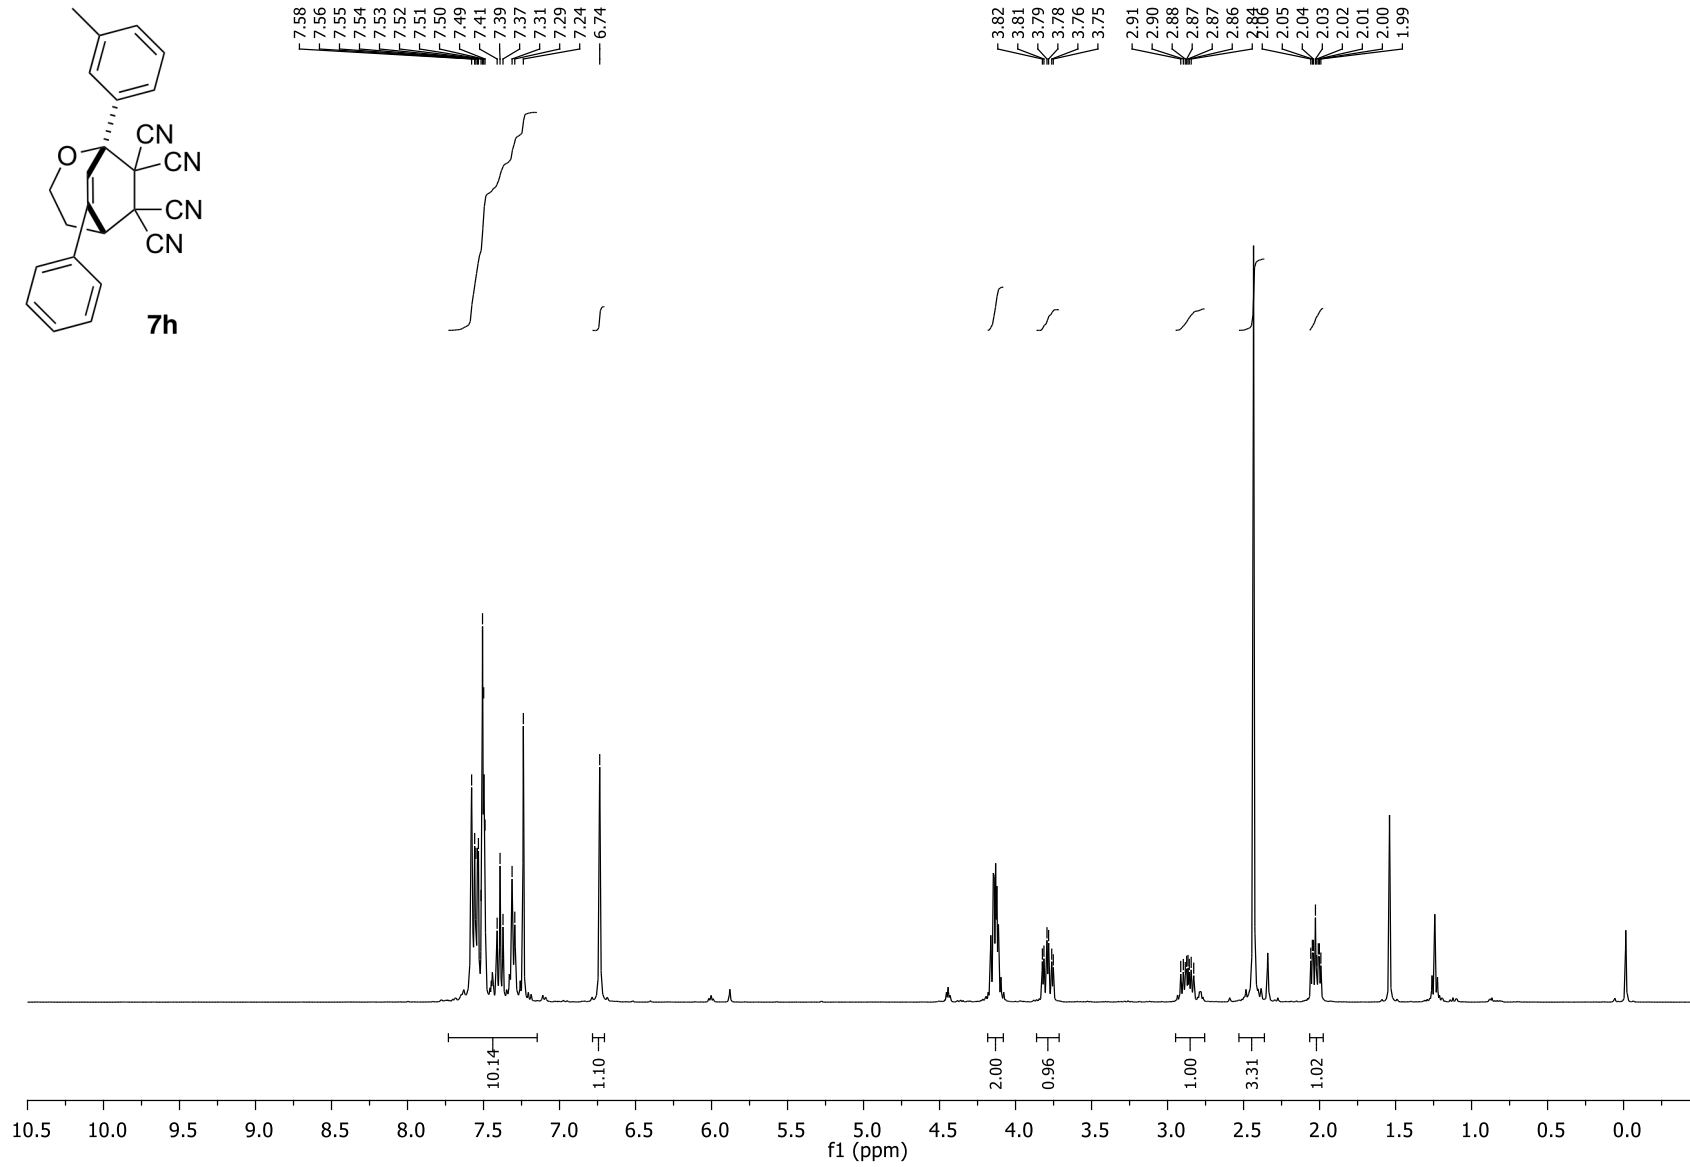

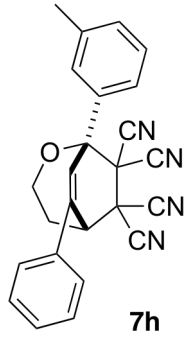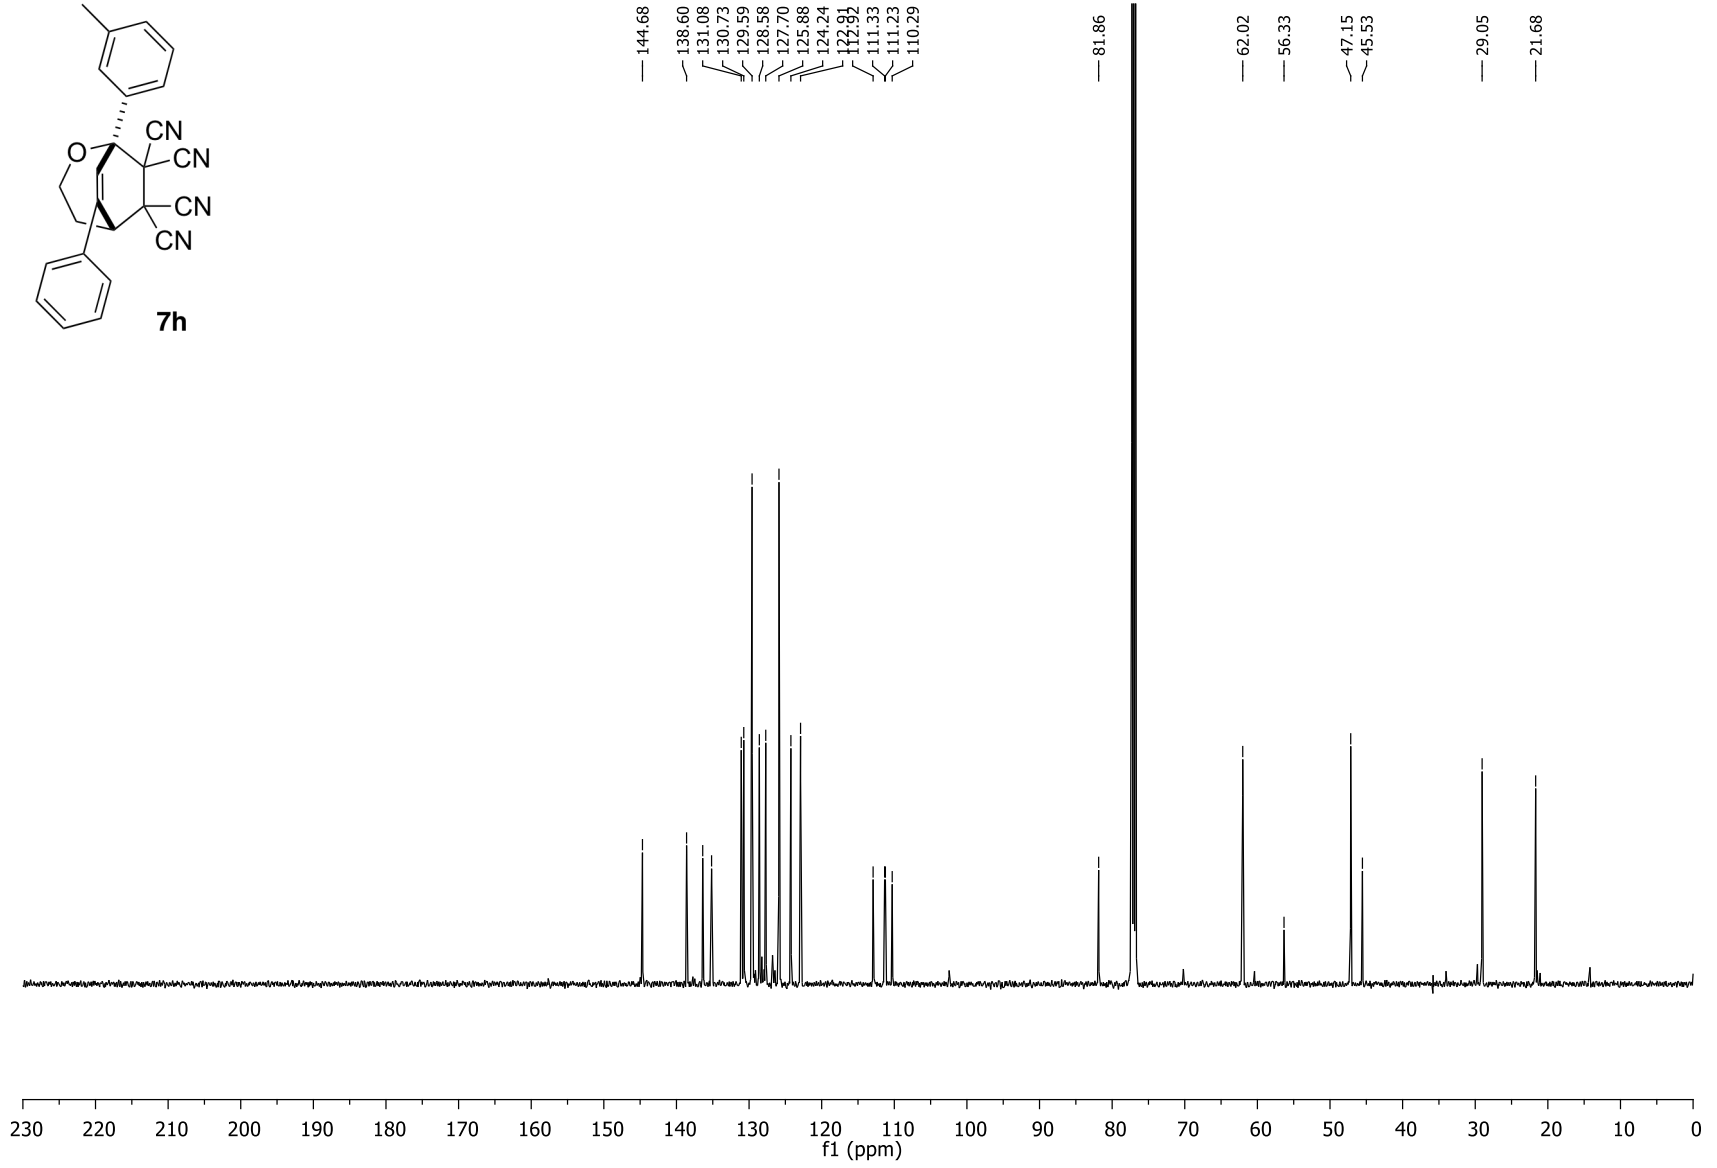

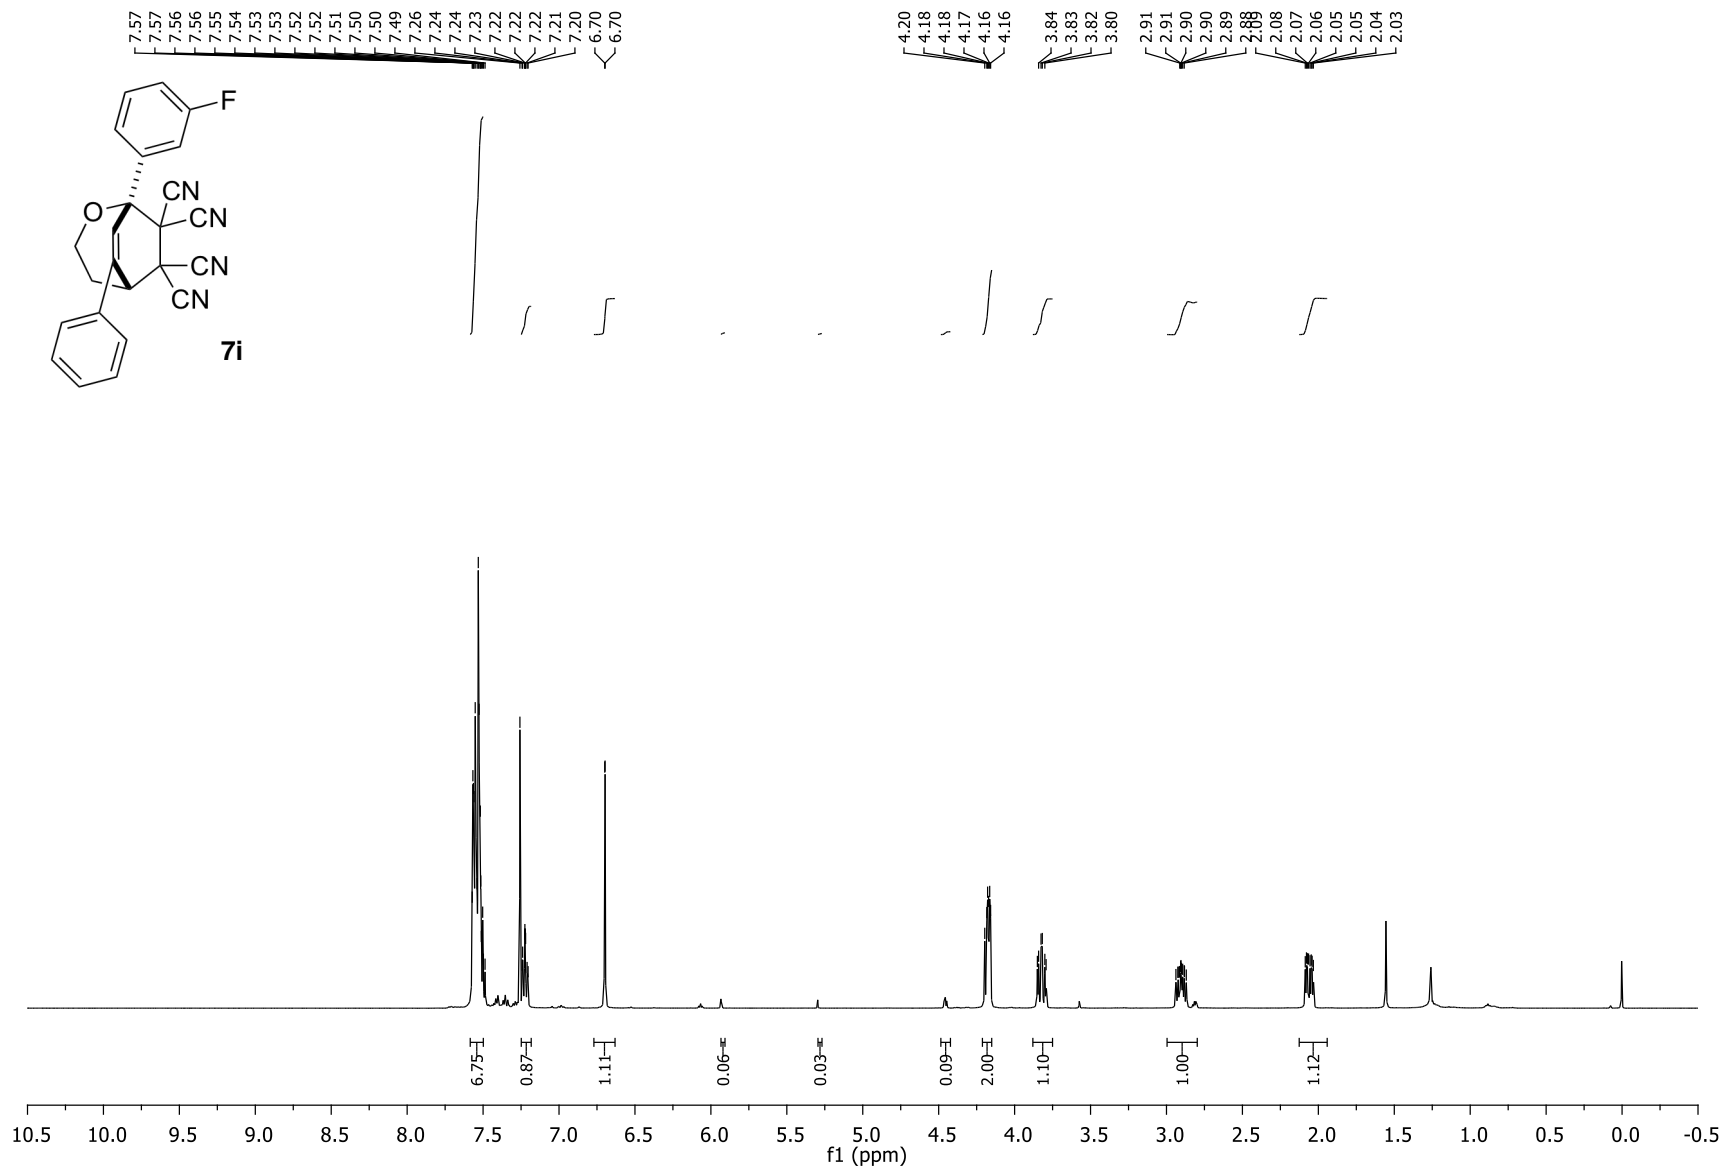

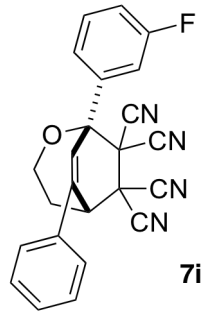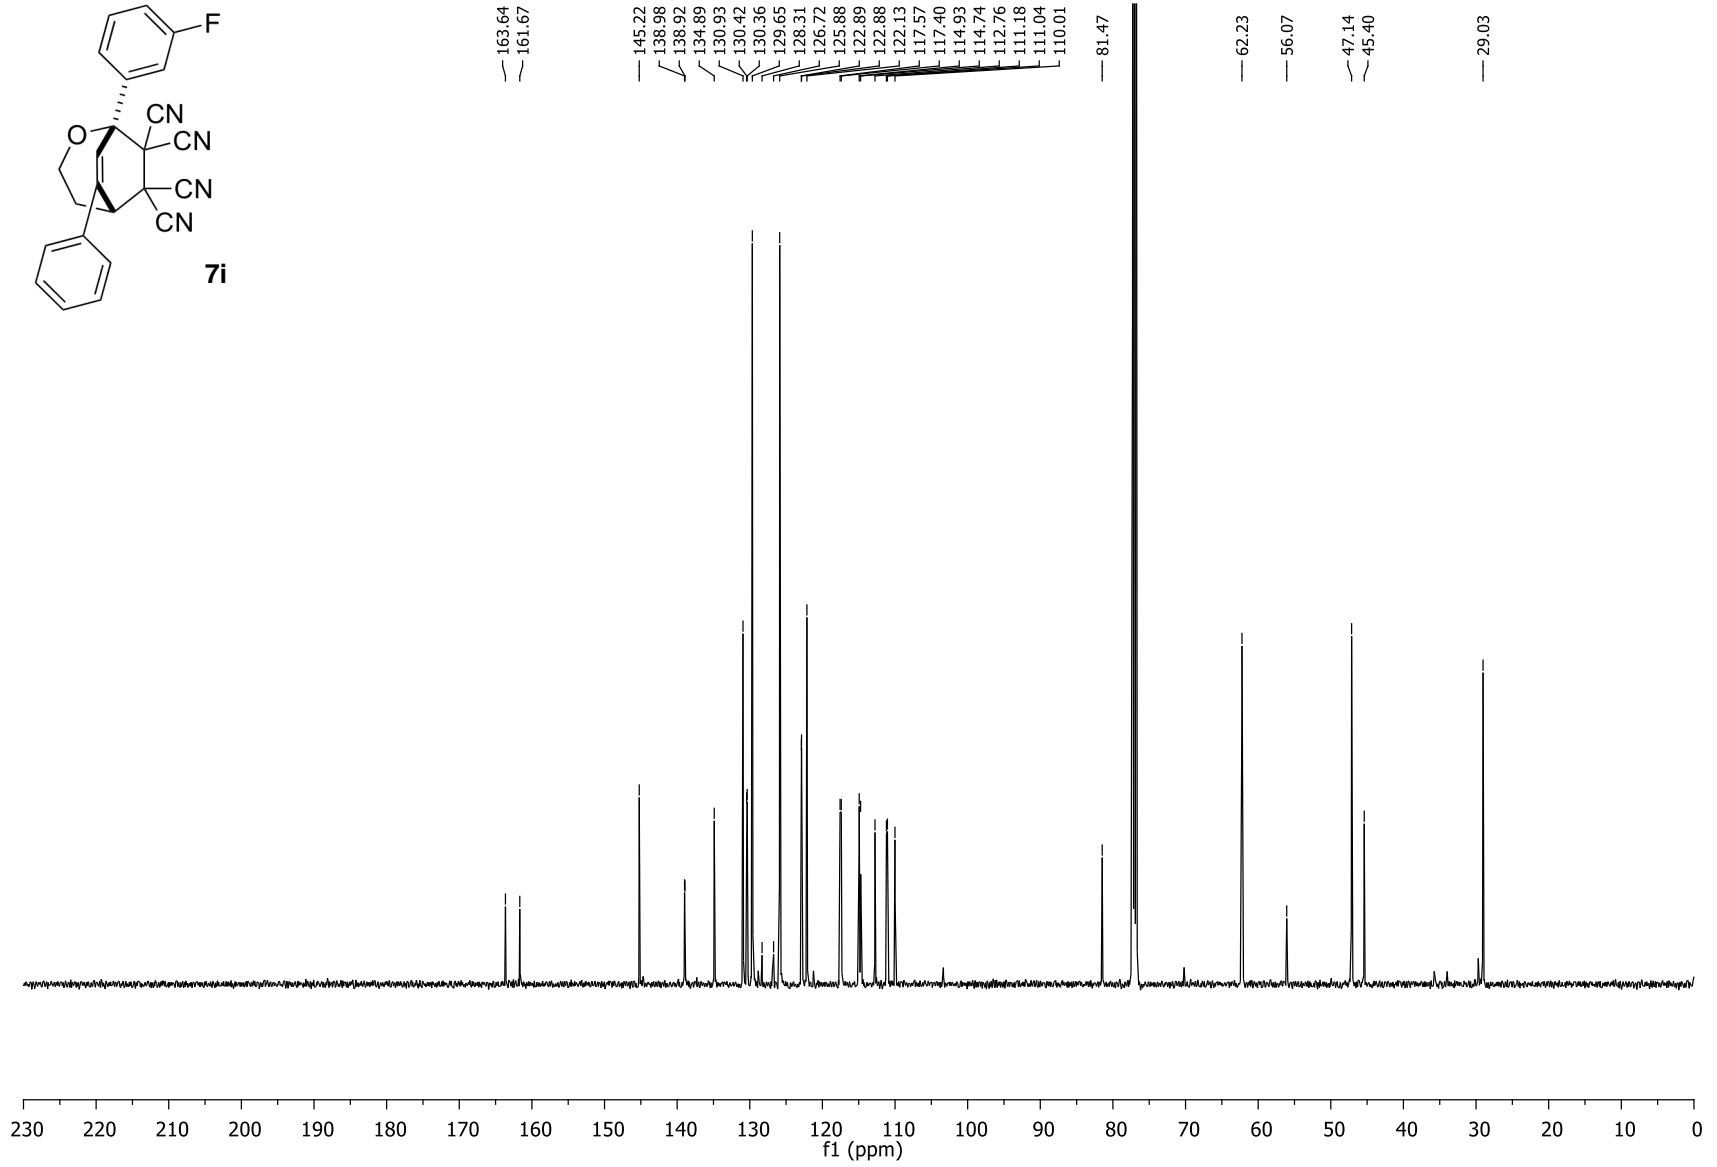

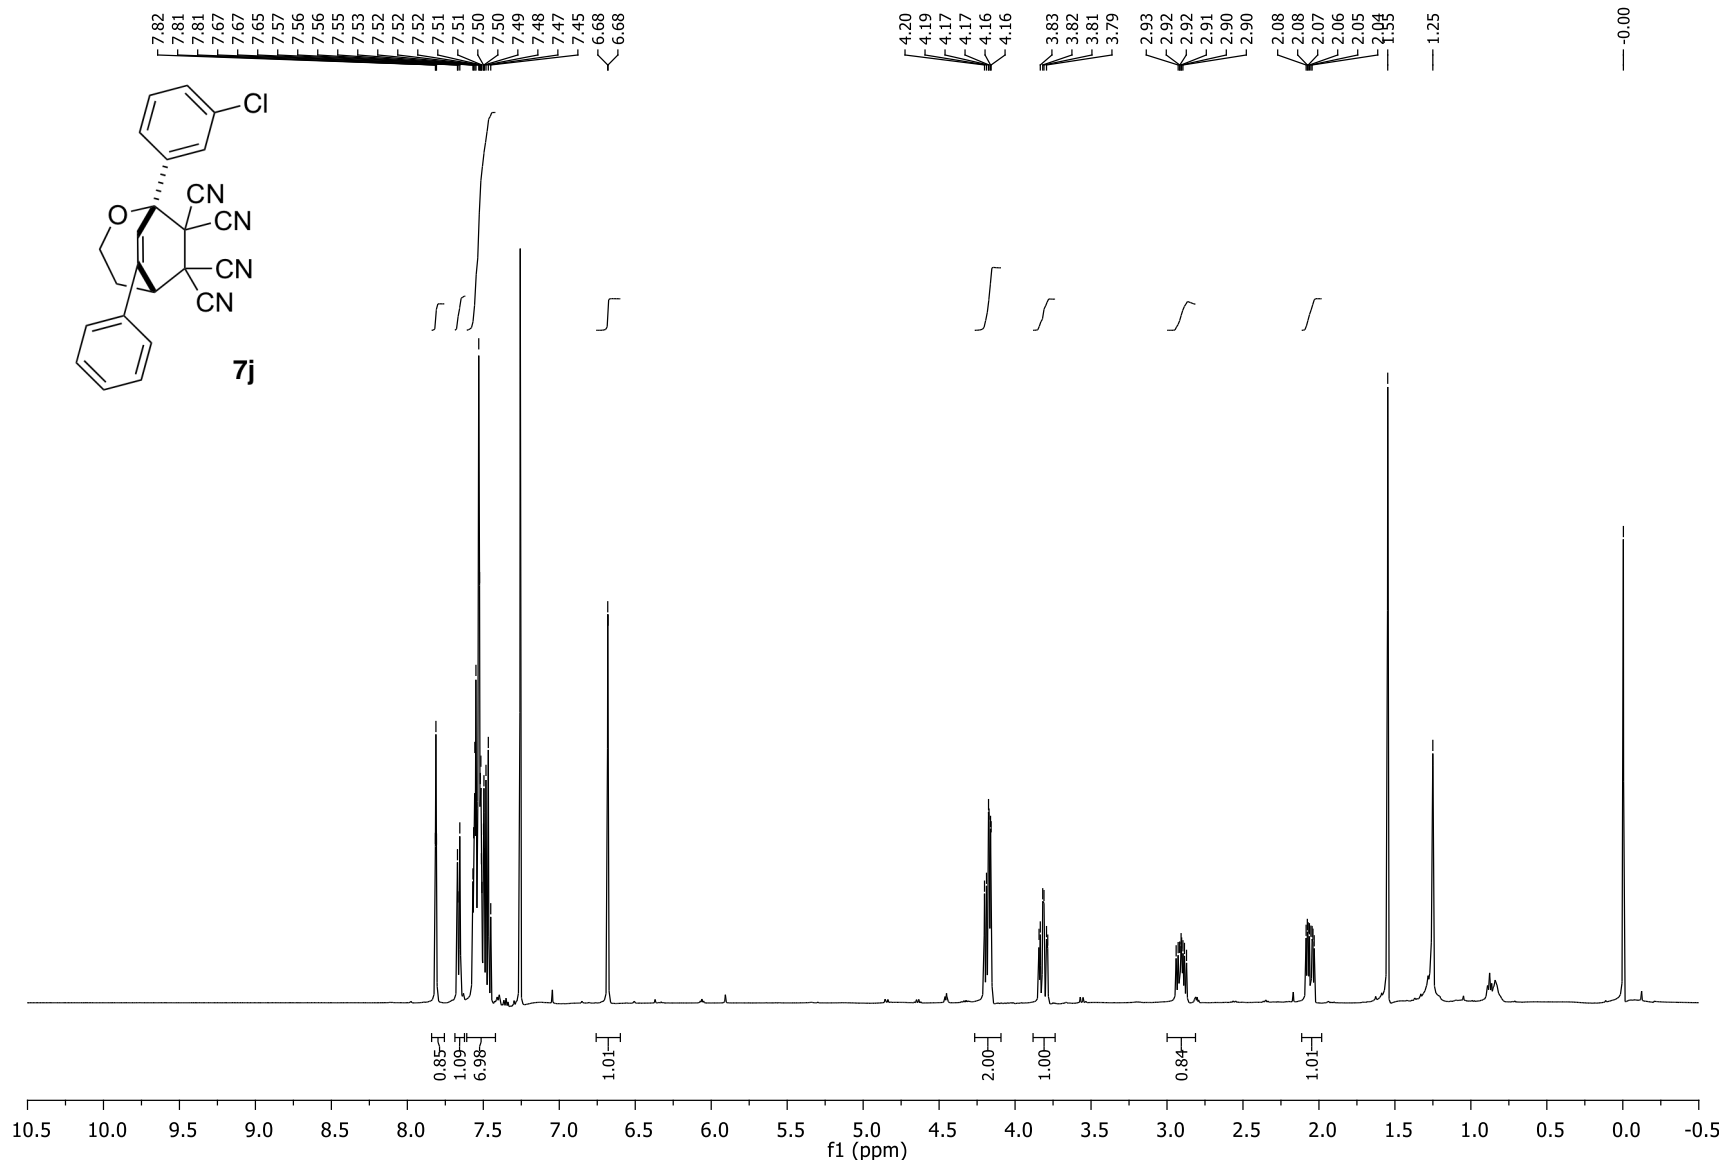

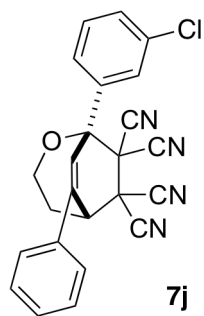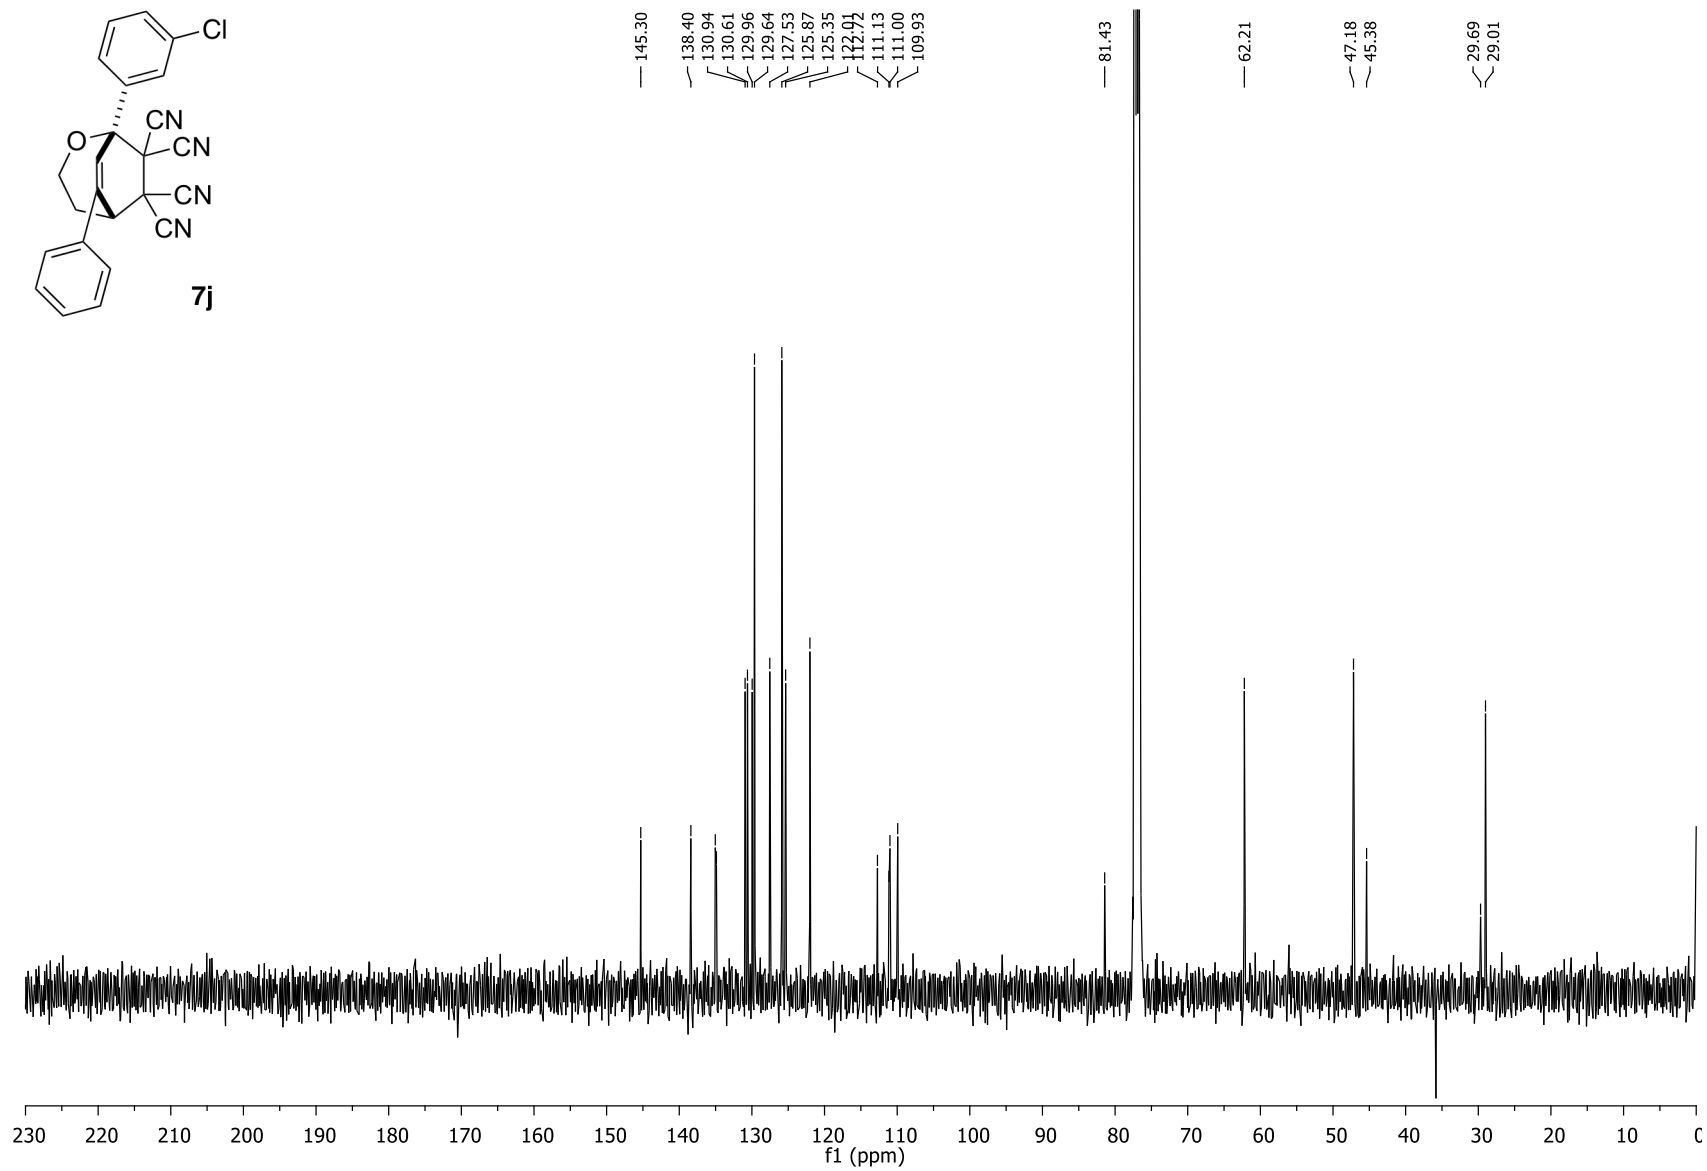

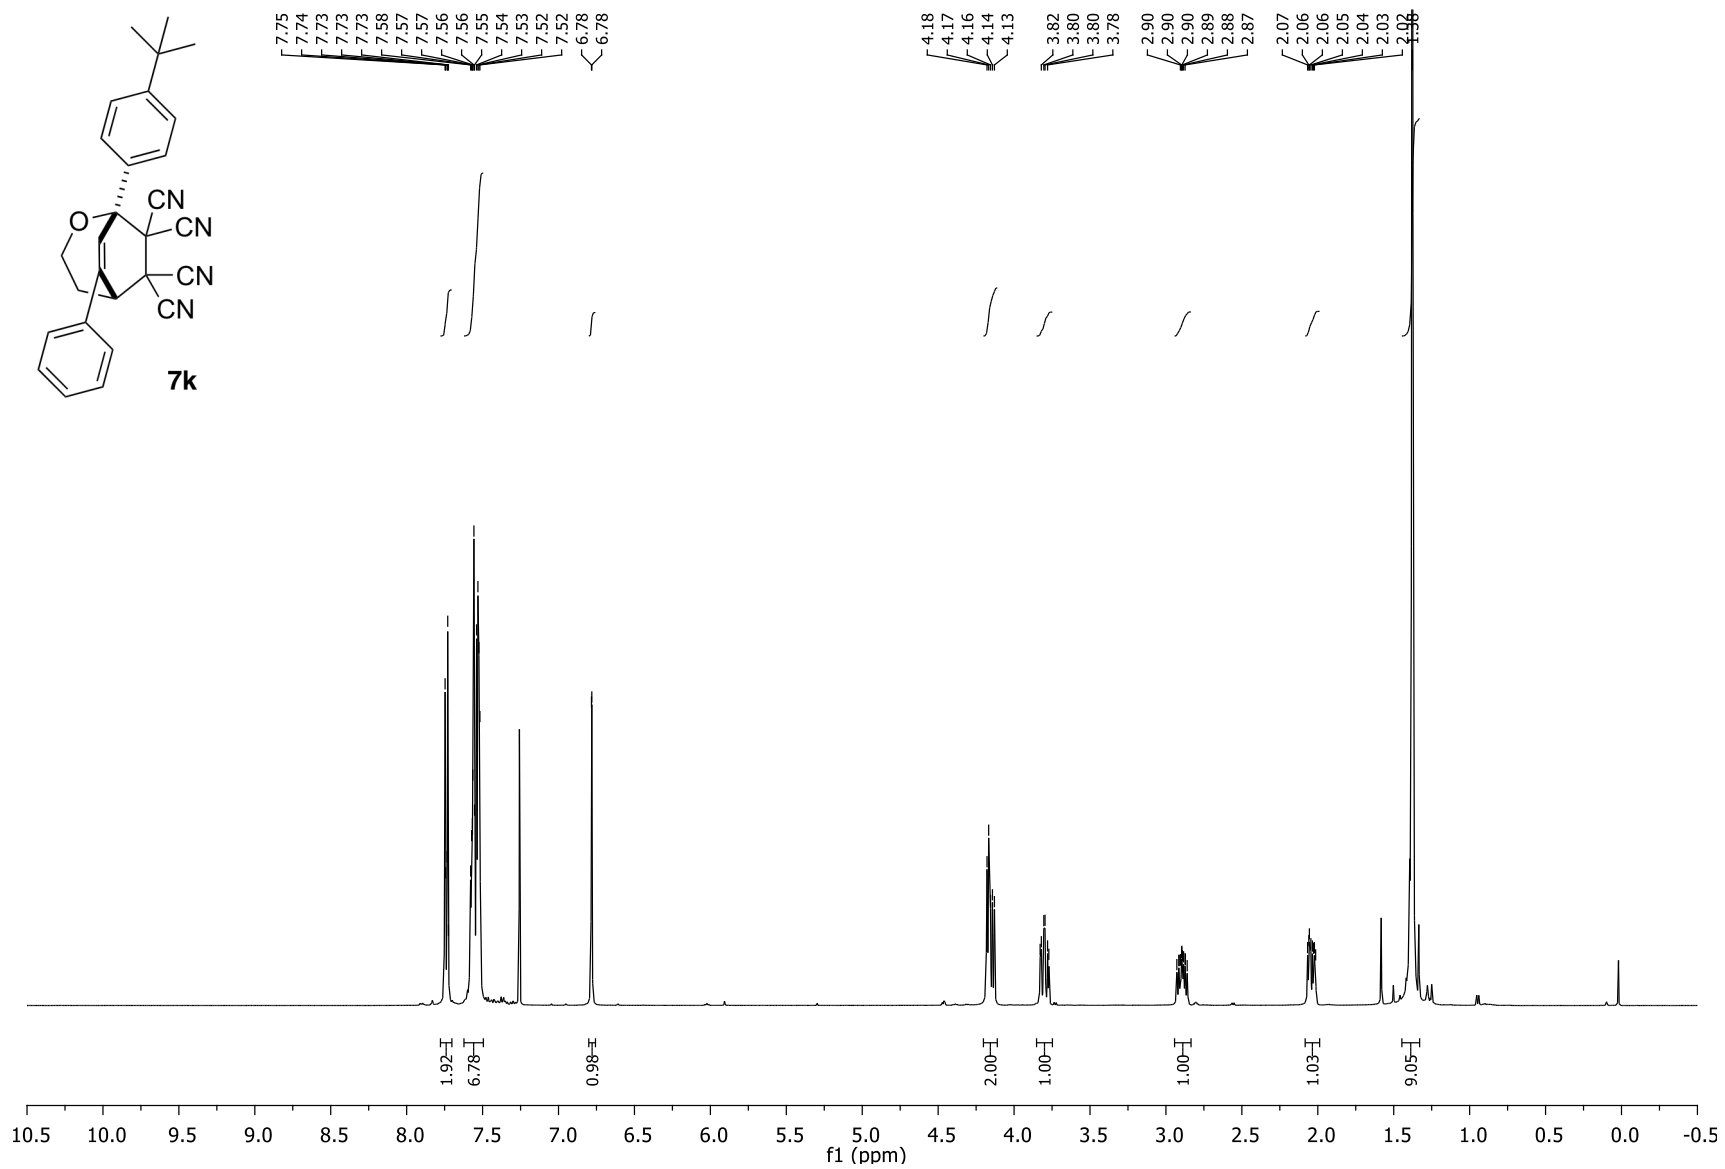

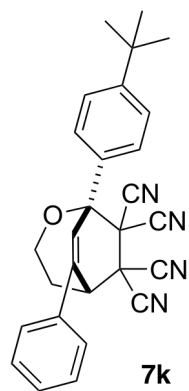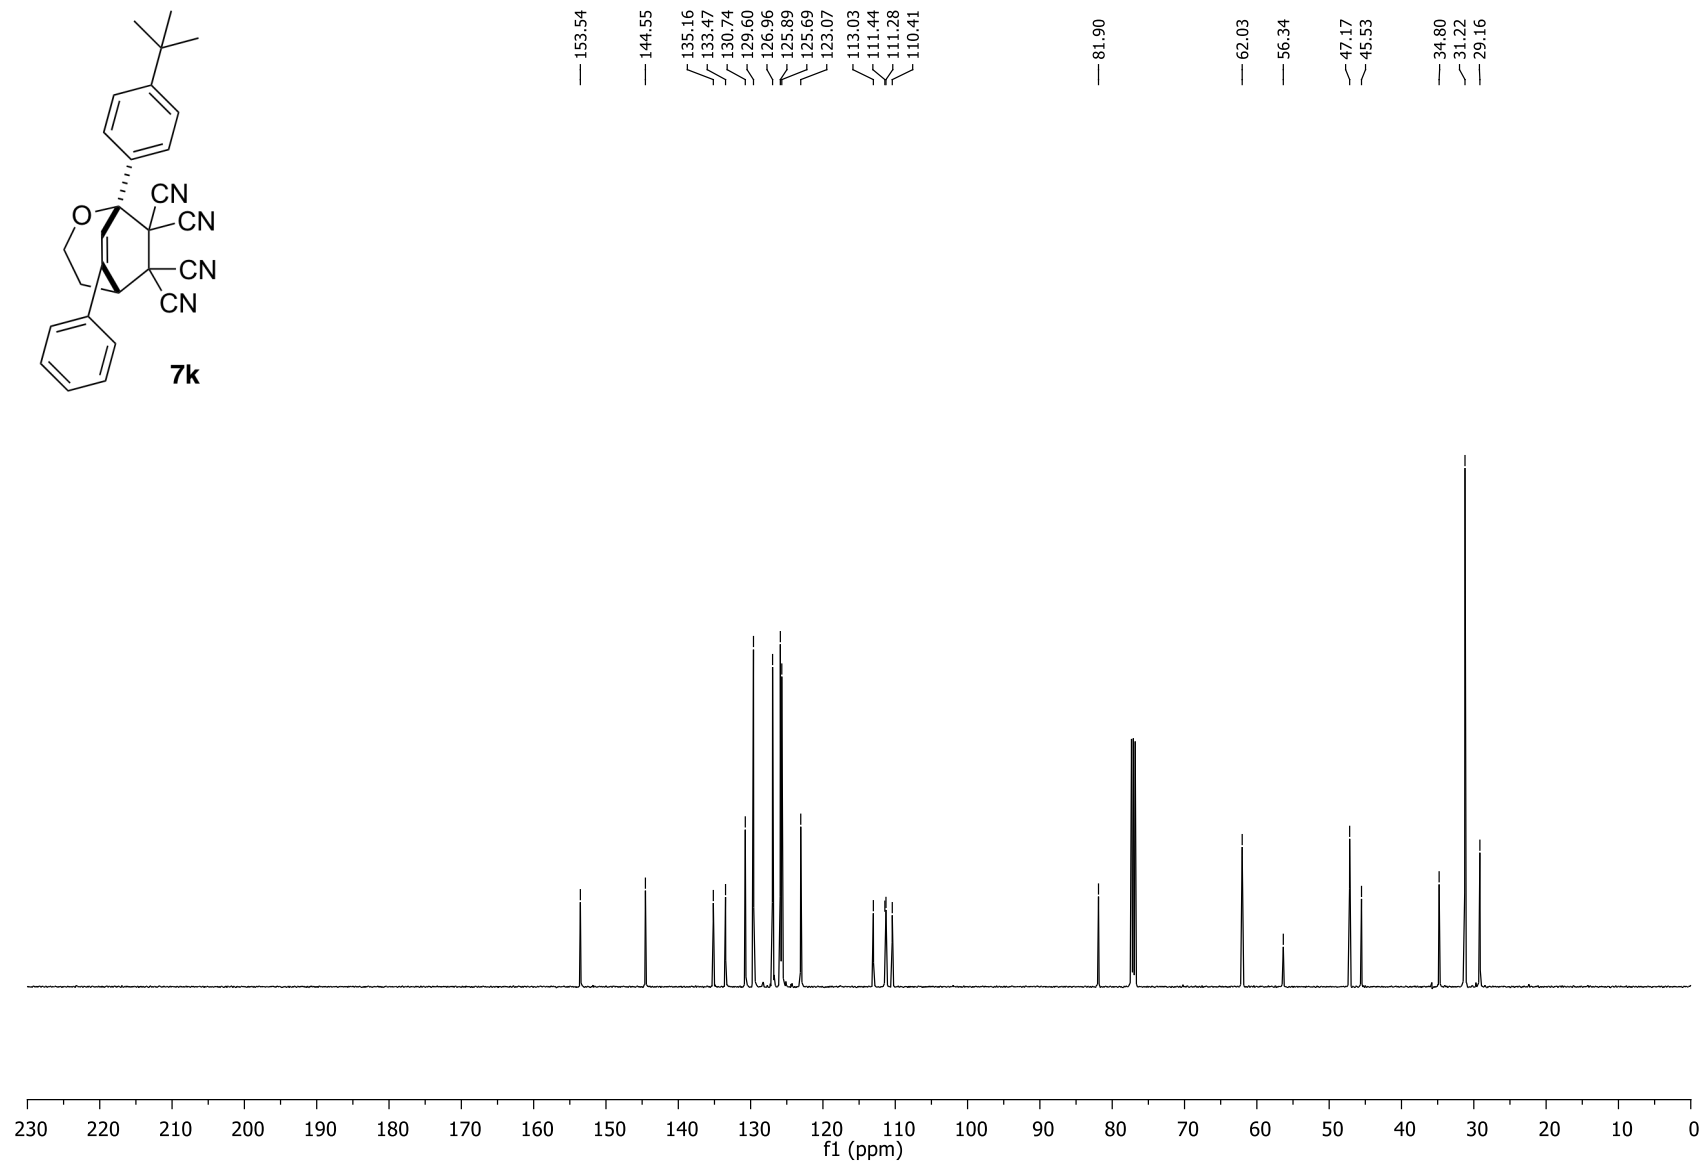



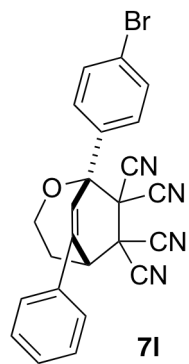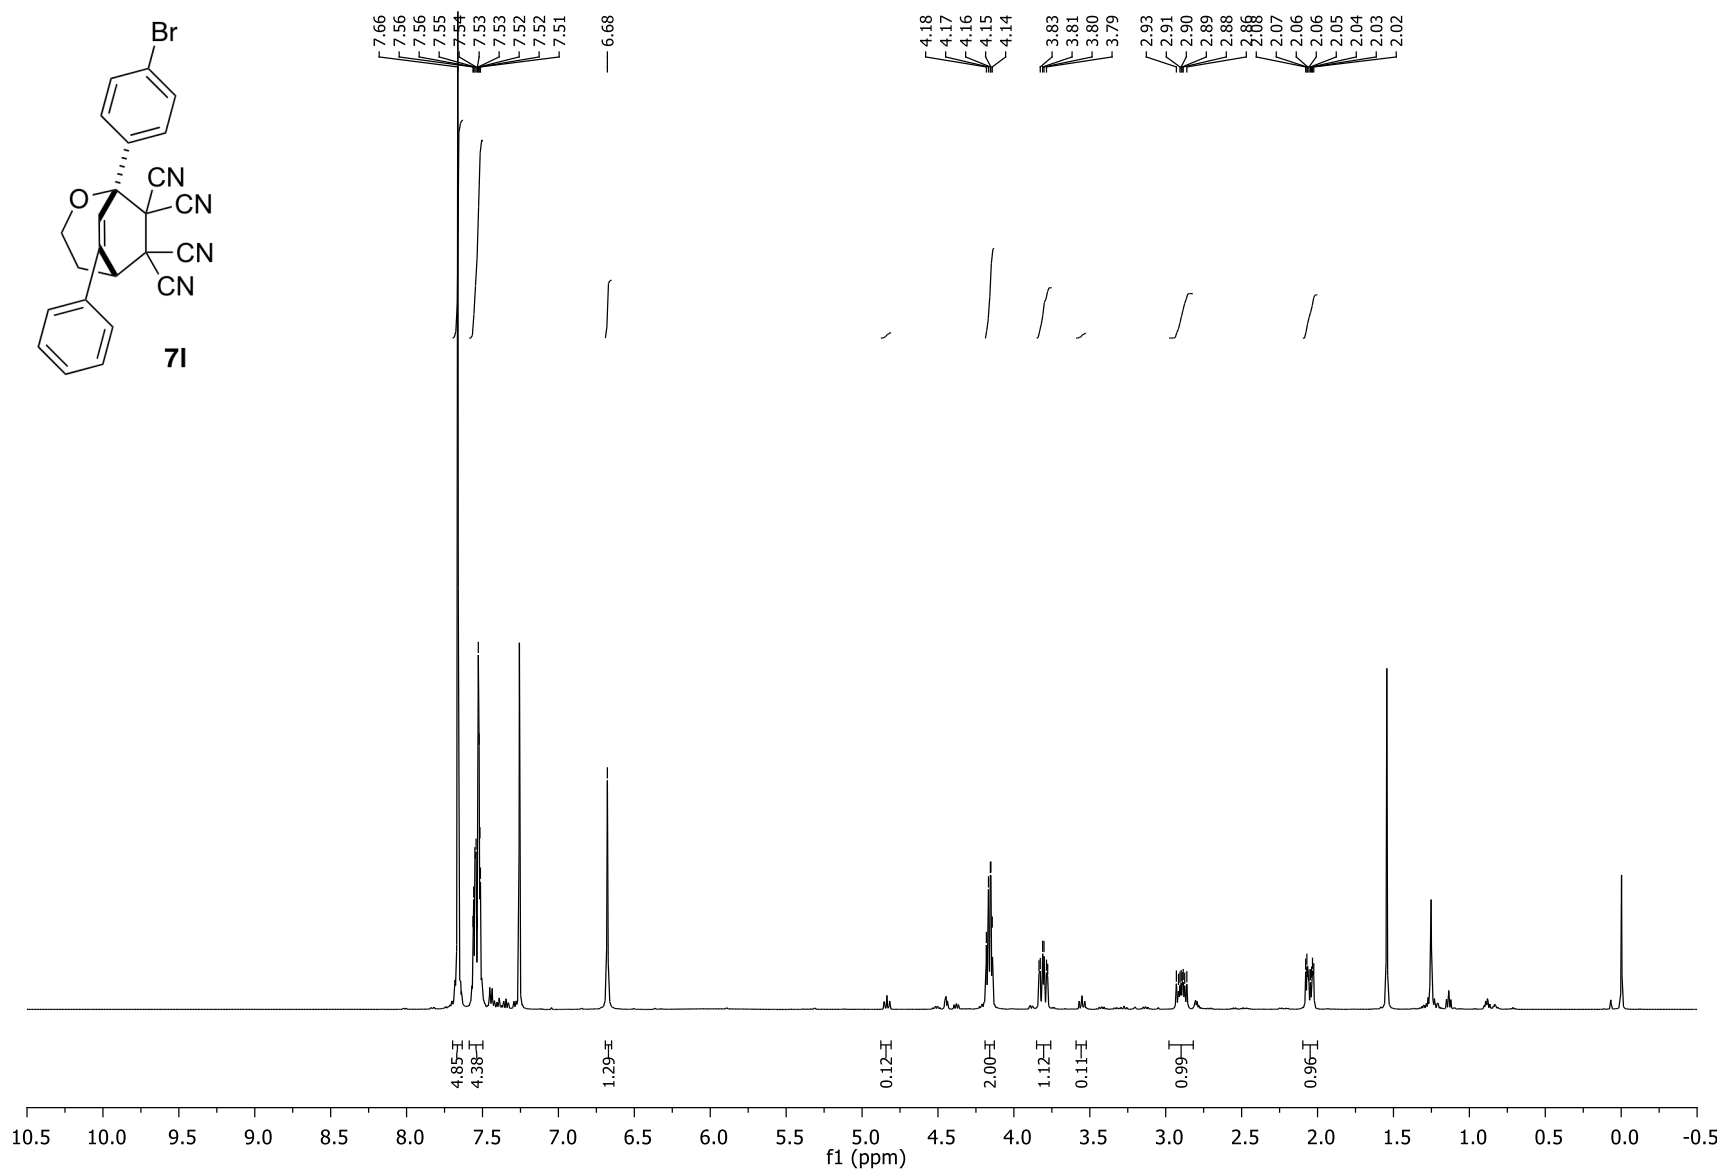

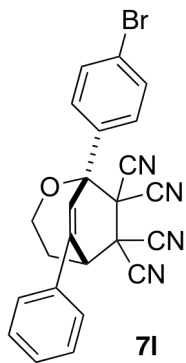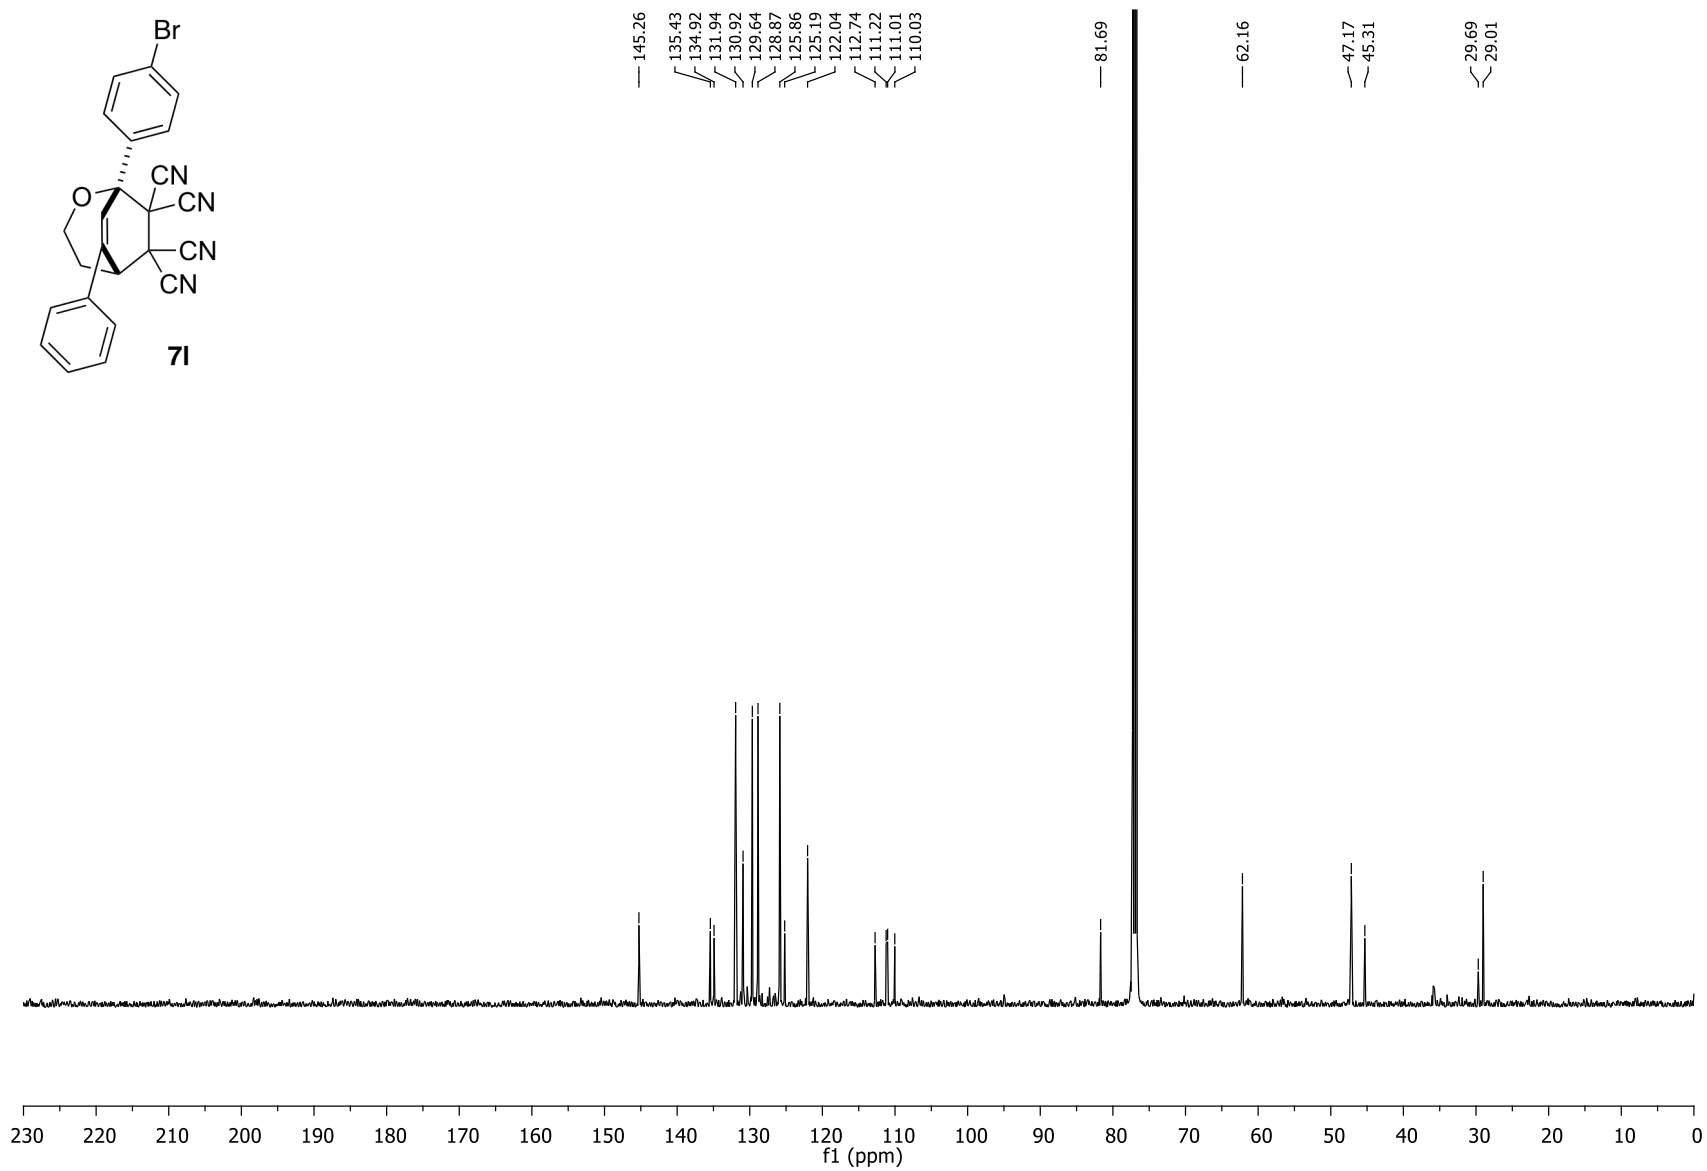

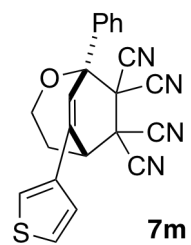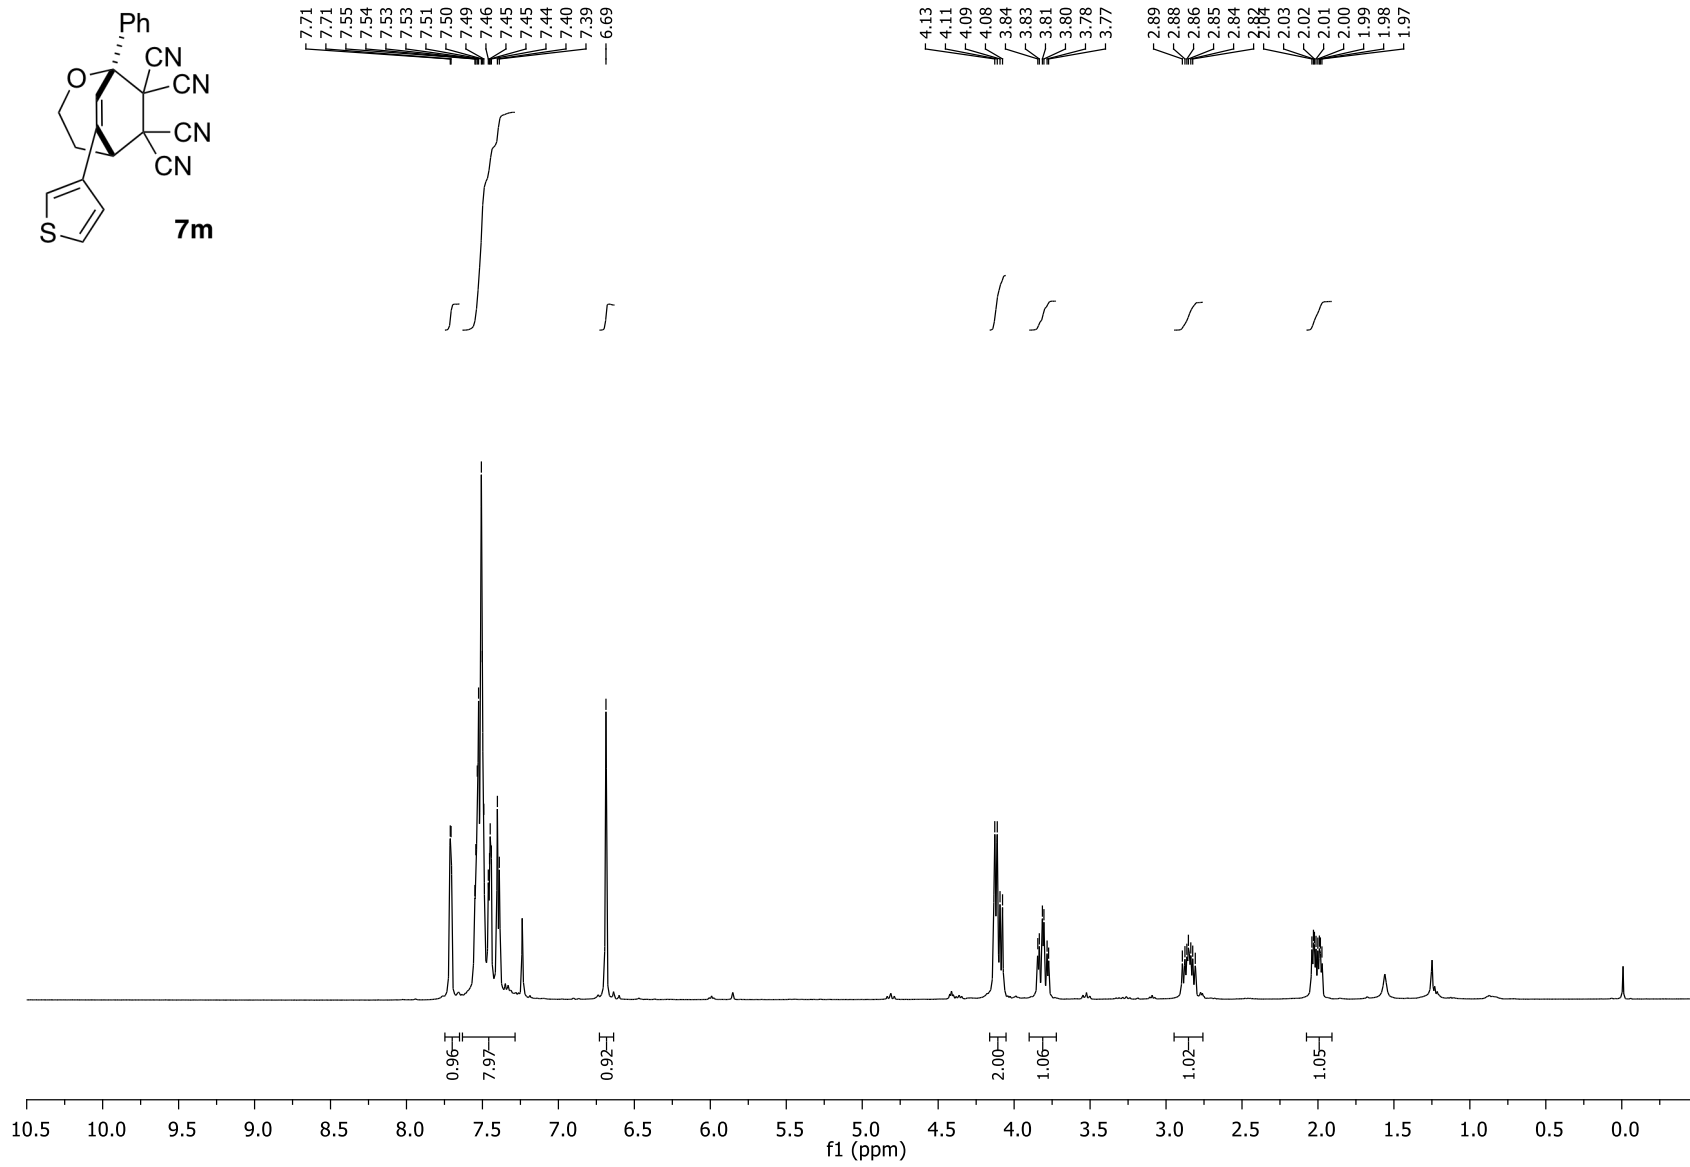

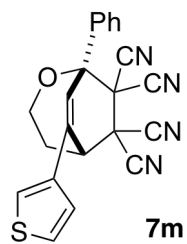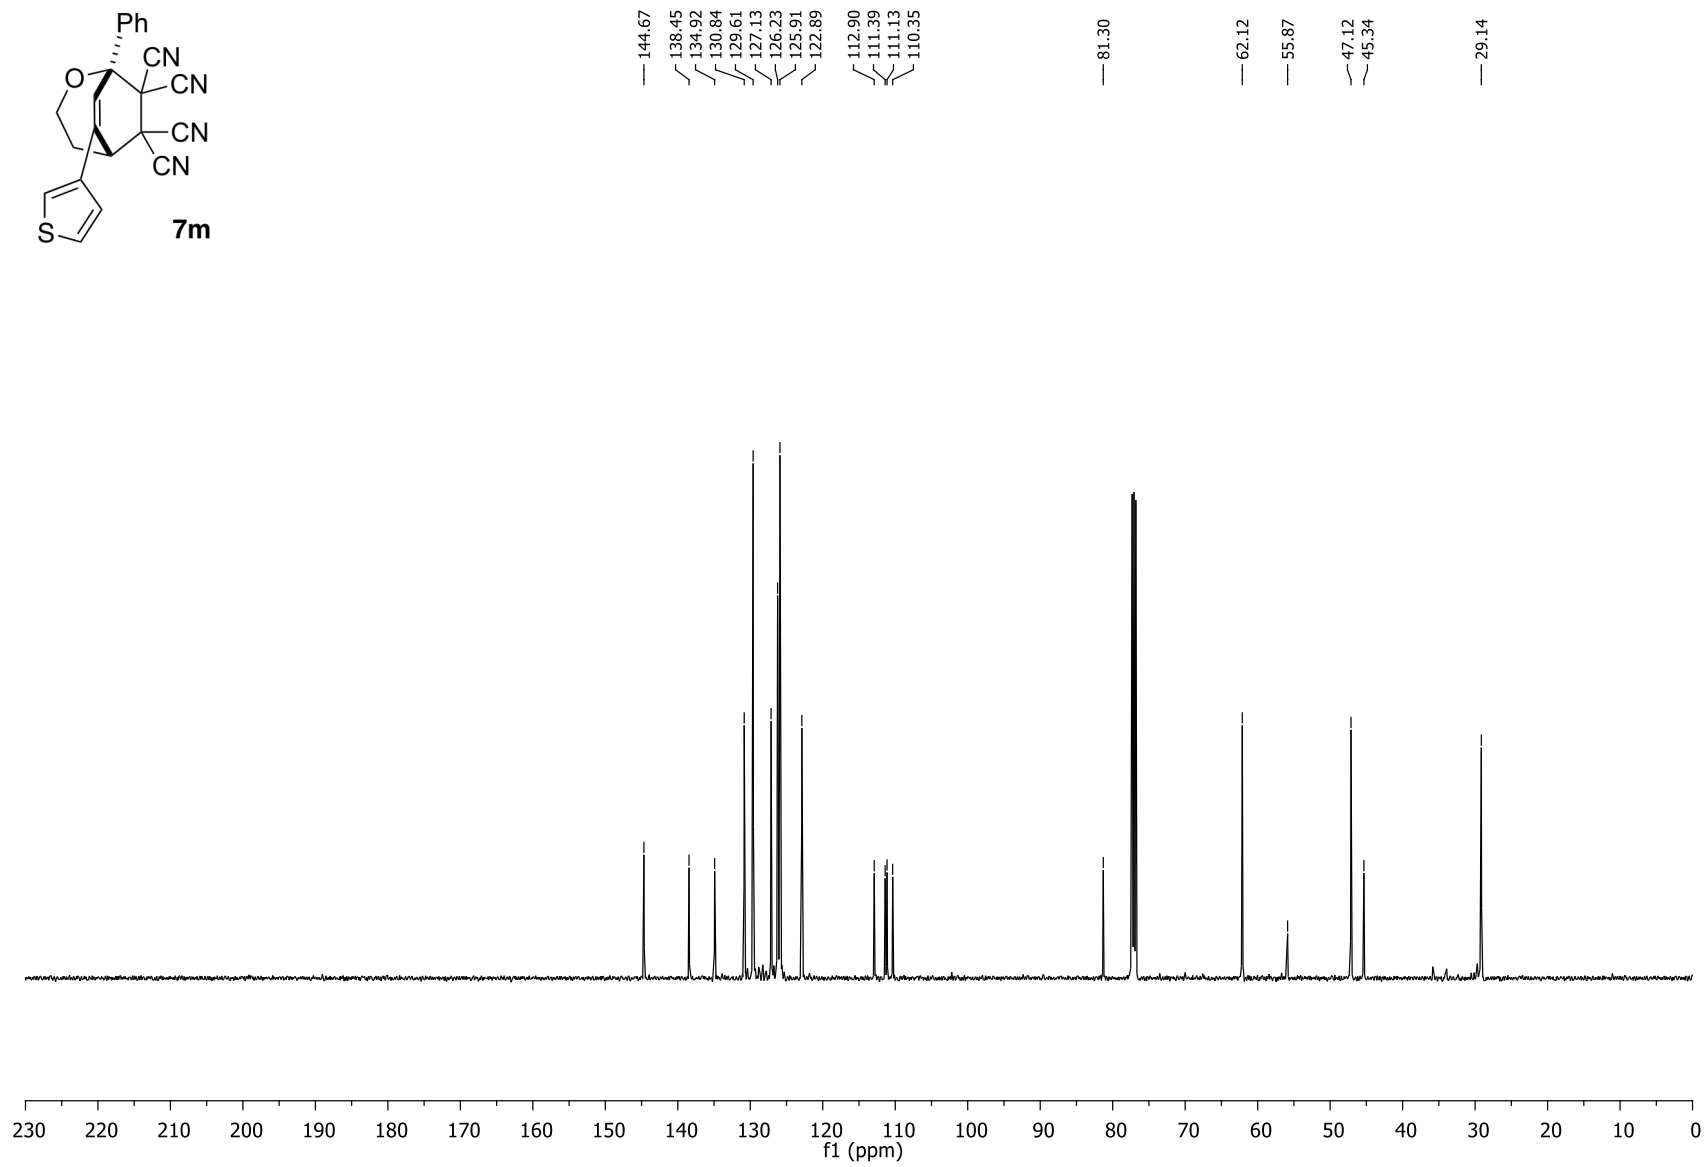

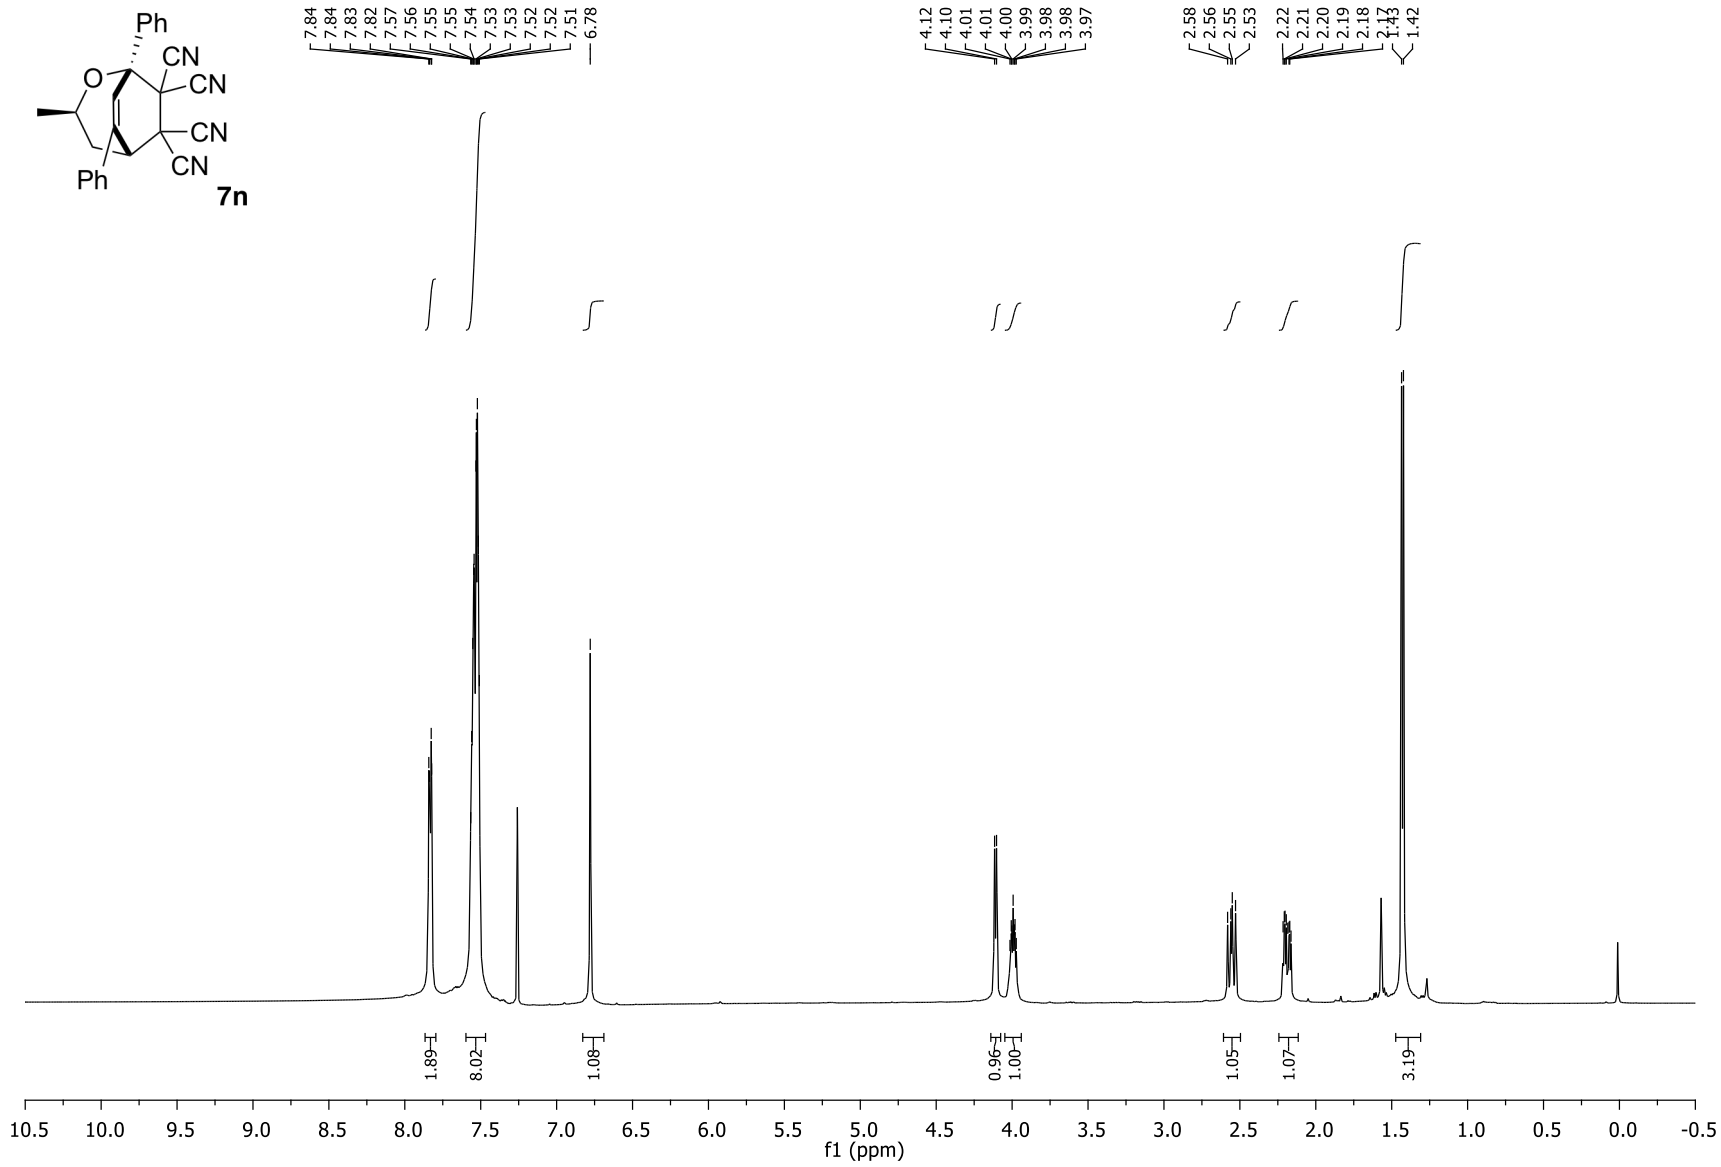

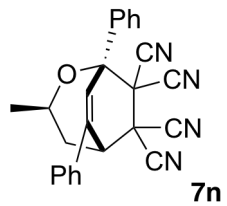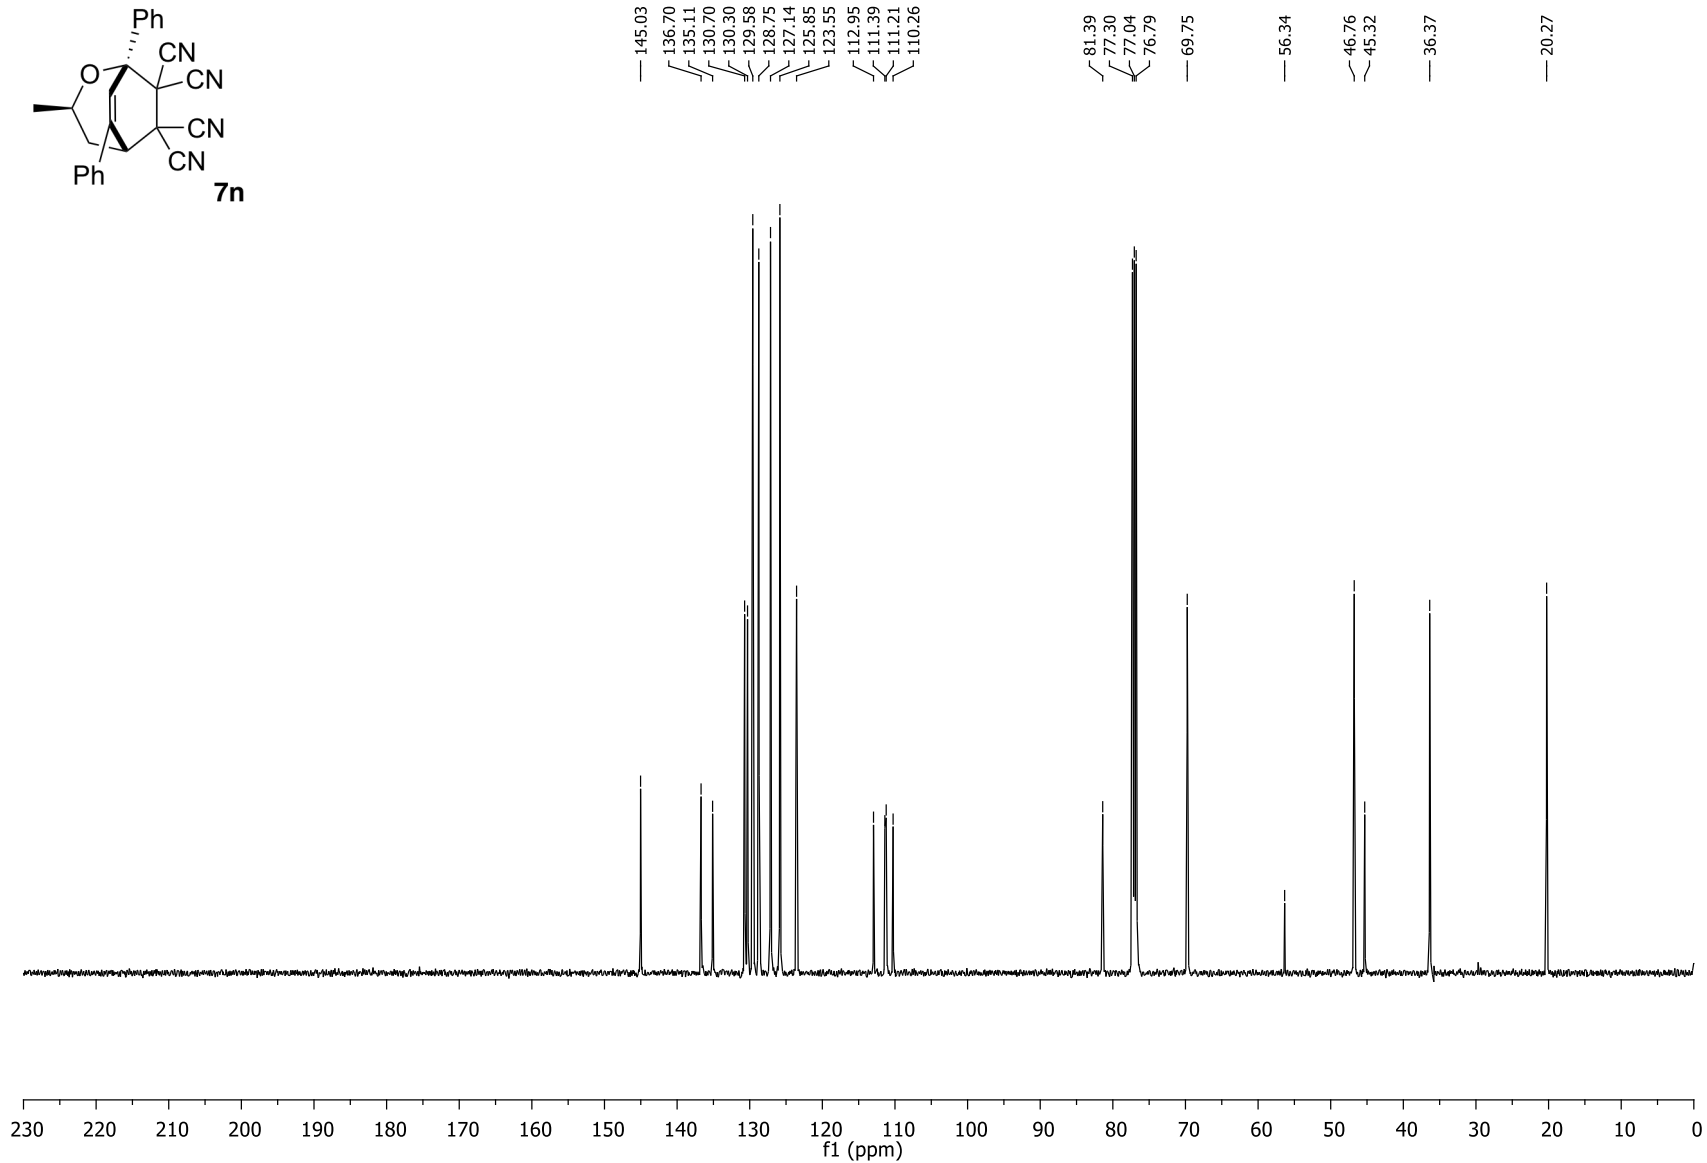

Supplement: NIHMS843588-supplement-ESI.pdf [file NIHMS843588-supplement-ESI.pdf]
